# Supplementary material for: Facile access to chiral chromanone-2-carboxylic acids enabled by rhodium-catalyzed chemo- and enantioselective hydrogenation
Source: Royal Society of Chemistry journal article supplement (doi:10.1039/d2cc00589a), 2022-01-01
Supplement: d2cc00589a1.pdf [file d2cc00589a1.pdf]

## Supporting Information

### **Facile access to chiral chromanone-2-carboxylic acids enabled by Rhodium-catalyzed chemo- and enantioselective hydrogenation**

Zhuang Nie,<sup>a,b, ‡</sup> Song Liu,<sup>c, ‡</sup> Tonglin Wang,<sup>b</sup> Zhanhong Shen,<sup>b</sup> Huifang Nie,<sup>b</sup> Jiayue Xi,<sup>b</sup> Dongxu Zhang,<sup>b</sup> Xiaohui Zheng,<sup>\*, a</sup> Shengyong Zhang<sup>\*, b</sup> and Lin Yao<sup>\*, b</sup>

<sup>a</sup> Key Laboratory of Resource Biology and Biotechnology in Western China, Ministry of Education, The College of Life Science, Northwest University, Xi'an 710069, PR China.

<sup>b</sup> Department of Medicinal Chemistry and Pharmaceutical Analysis, School of Pharmacy, Fourth Military Medical University, Xi'an, 710032, PR China.

<sup>c</sup> Chongqing Key Laboratory of Environmental Materials and Remediation Technologies, Chongqing University of Arts and Sciences, Chongqing, 402160, PR China

E-mail: [zhengxh@nwu.edu.cn](mailto:zhengxh@nwu.edu.cn); [syzhang@fmmu.edu.cn](mailto:syzhang@fmmu.edu.cn); [yaolinlin@fmmu.edu.cn](mailto:yaolinlin@fmmu.edu.cn)

## Table of Contents

|                                                                 |      |
|-----------------------------------------------------------------|------|
| 1. General Information.....                                     | S3   |
| 2. Preparation and Characterization of Substrates.....          | S3   |
| 3. Asymmetric Hydrogenation of Chromone-2-carboxylic acids..... | S11  |
| 3.1 General Procedure of Asymmetric Hydrogenation.....          | S11  |
| 3.2 Ligands Screening in Asymmetric Hydrogenation.....          | S11  |
| 4. Analytical Data of Hydrogenation Products.....               | S13  |
| 5. Scale-up Synthesis and Transformations.....                  | S21  |
| 6. X-ray Analysis.....                                          | S23  |
| 7. Computational Details.....                                   | S25  |
| 8. NMR Spectra.....                                             | S57  |
| 9. HPLC Spectra.....                                            | S114 |
| 10. Reference.....                                              | S142 |

## 1. General information

Unless otherwise noted, all experiments dealing with air- or moisture-sensitive compounds were carried out in the argon-filled glove box or using standard Schlenk techniques and oil bath were utilized as the heat source. All commercially available chemicals including solvents were used without further purification.  $^1\text{H}$  NMR,  $^{13}\text{C}$  NMR were recorded on a Bruker ADVANCE III (400 MHz) spectrometer with  $\text{CDCl}_3$ ,  $\text{CD}_3\text{OD}$ ,  $\text{DMSO-d}$  as the solvent and tetramethylsilane (TMS) as the internal standard. Enantiomeric excesses were determined by Daicel chiral column on an Agilent 1260 Series HPLC instrument. Optical rotations were measured on a PERKIN ELMER polarimeter 343 instruments. High-Resolution Mass Spectroscopy (HRMS) was carried out on a VARIA FT-ICR MS. The absolute configuration of the hydrogenation products was determined by comparison of analytical data with the literature.

## 2. Preparation and characterization of substrates

The 4-oxo-4H-chromene-2-carboxylic acids were prepared according to literature procedure.<sup>1</sup>

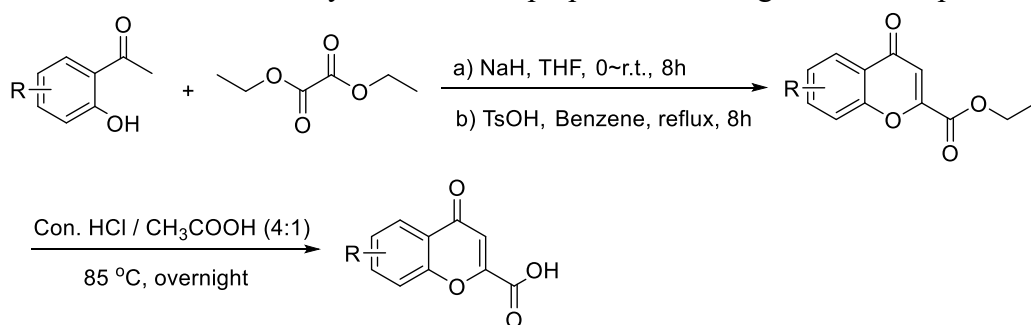

Sodium hydride (60% dispersion in mineral oil, 2.07 g, 86.2 mmol) was rinsed three times with hexanes, then suspended in THF (40 mL). A mixture of 2'-hydroxyacetophenone (22.0 mmol) and diethyl oxalate (55.1 mmol) in THF (2.5 mL) was added dropwise to the above suspension at 0°C. After complete addition, the reaction mixture was stirred for a further 8h at r.t., then quenched by pouring onto ice and further acidified to pH 6 with 6 M aq HCl. The solution was extracted with ethyl acetate and the combined organic layers were washed with brine and dried over magnesium sulfate. The solvent was evaporated to yield the crude 1, 3-dione. Without further purification, a solution of the crude 1, 3-dione product (14.0 mmol) was dissolved in benzene (40 mL) and was treated by 277.5 mg TsOH, and the mixture allowed to reflux for 8 h. After completion of the reaction, the mixture was washed with saturated aq.  $\text{NaHCO}_3$  and was extracted by EtOAc for three times, the combined organics were purified by column chromatography to afford the pure chromone-2-carboxylate.

2g of the chromone-2-carboxylate was added in a 250 mL round-bottom flask, and treated with 20 mL concentrated HCl and 80 mL glacial acetic acid. The mixture was stirred under 85°C overnight, and then was cooled to room temperature, the corresponding chromone-2-carboxylic acid was precipitated and was filtered under reduced pressure.

The 4-oxo-4H-thiochromene-2-carboxylic acids were prepared according to literature procedure.<sup>2</sup>

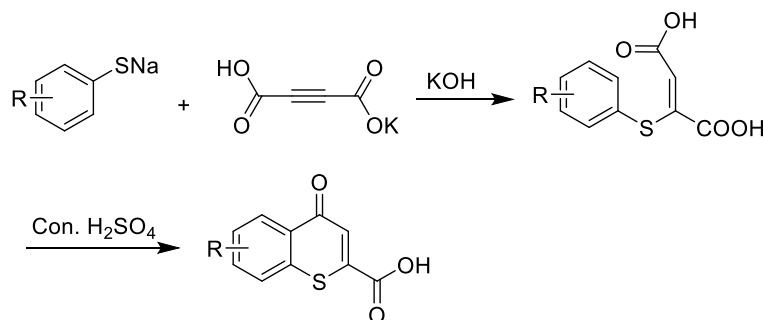

Sodium benzenethiolate (15 mmol) was dissolved in water (30 mL) containing KOH (45 mmol, 2.52g). Solid acetylene dicarboxylic acid mono potassium salt (15 mmol, 2.28g) was then added and the mixture was heated at 50°C for one hour. The cool solution was poured into water and the aqueous solution was washed with dichloromethane, adjusted to pH 2~3 with 3M HCl. The titled product was precipitated and filtered under reduce pressure, used directly in the next step.

To 8 mL of concentrated sulphuric acid was slowly the above obtained 2-(phenylthio) fumaric acid with stirring. After standing for 1 hour, the solution was poured onto cold ice and the precipitated greenish sold was filtered off, washed with water until acid-free and dried. The crude solid was crystallized from ethanol to give the 4-oxo-4H-thiochromene-2-carboxylic acid.

The alkyne functionalized substrate **1u** was prepared according to literature procedure.<sup>3</sup>

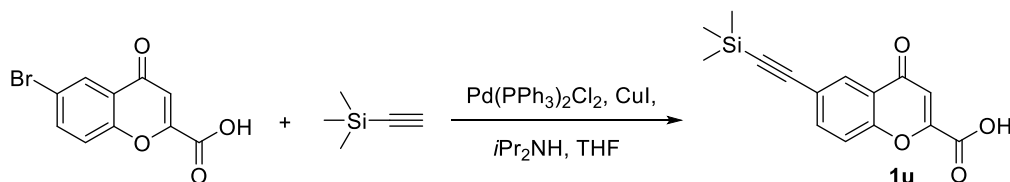

In a 50 mL sealed tube, a solution of 6-bromo-4-oxo-4H-chromene-2-carboxylic acid **1m** (269 mg, 1 mmol), Pd(PPh<sub>3</sub>)<sub>2</sub>Cl<sub>2</sub> (28 mg, 0.04 mmol) and CuI (3.8 mg, 0.02 mmol) in dry THF (10 mL) was degassed and *i*Pr<sub>2</sub>NH (0.28 mL, 2 mmol) was added. After 10 min, trimethylsilylacetylene (0.21 mL, 1.5 mmol) was added slowly and mixture was left to stir at 45°C. After completion of reaction (monitored by TLC), the reaction mixture was filtered through acelite pad. The organic layer was evaporated under reduced pressure and the resulting crude mixture was purified by silica gel column chromatography to afford the pure product as a light yellow solid.

6-acetyl-4-oxo-4H-chromene-2-carboxylic acid **1v** was prepared following literature procedure.<sup>3</sup>

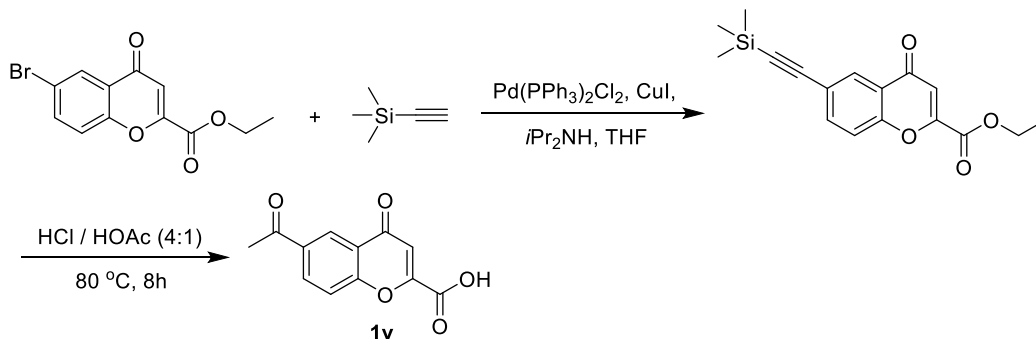

In a 250 mL sealed tube, a solution of ethyl 6-bromo-4-oxo-4H-chromene-2-carboxylate (2 g, 7 mmol), Pd(PPh<sub>3</sub>)<sub>2</sub>Cl<sub>2</sub> (196.5 mg, 0.28 mmol) and CuI (26.6 mg, 0.14 mmol) in dry THF (80 mL) was degassed and *i*Pr<sub>2</sub>NH (1.96 mL, 14mmol) was added. After 10 min, trimethylsilylacetylene (1.48 mL, 10.5 mmol) was added slowly and mixture was left to stir at 45°C. After completion of reaction (monitored by TLC), the reaction mixture was filtered through acelite pad. The organic layer was evaporated under reduced pressure and used directly in the next step.

The aboved-obtained crude product was dissolved in a solution of concentrated hydrochloric acid and glacial acetic acid (4:1) and stirred at 80°C overnight. After completion of reaction, extracted with ethyl acetate for three times. The organic layers were collected and evaporated under reduced pressure. The obtained crude product was purified by silica gel column chromatography to afford the pure product as a white solid.

Characterization data of all the unsaturated acids was showed as followings:

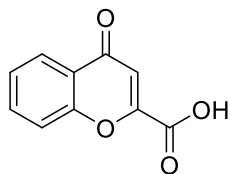

**4-oxo-4H-chromene-2-carboxylic acid (1a):** 89% yield, white solid. Mp:216-217°C. <sup>1</sup>H NMR (400 MHz, DMSO-d<sub>6</sub>) δ 8.06 (d, *J*=7.3 Hz, 1H), 7.89 (t, *J*=7.2 Hz, 1H), 7.75 (d, *J*=8.5 Hz, 1H), 7.55 (t, *J*=7.5 Hz, 1H), 6.92 (s, 1H). <sup>13</sup>C NMR (100 MHz, DMSO-d<sub>6</sub>) δ 177.59, 161.41, 155.44, 153.27, 135.18, 126.06, 124.91, 123.72, 118.88, 113.47. HRMS (ESI): *m/z* for C<sub>10</sub>H<sub>6</sub>O<sub>4</sub> [M+H]<sup>+</sup> calcd 191.0266, found 191.0326.

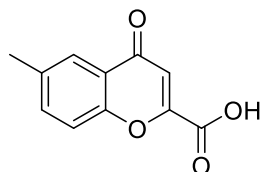

**6-methyl-4-oxo-4H-chromene-2-carboxylic acid (1b):** 87% yield, white solid. Mp:232-233°C. <sup>1</sup>H NMR (400 MHz, DMSO-d<sub>6</sub>) δ 8.16 (s, 1H), 7.90 (d, *J*= 8.3 Hz, 1H), 7.66 (d, *J*= 8.2 Hz, 1H), 7.47 (s, 1H), 2.47 (s, 3H). <sup>13</sup>C NMR (100 MHz, DMSO-d<sub>6</sub>) δ 177.50, 161.45, 153.72, 153.10, 136.23, 135.76, 124.11, 123.44, 118.65, 113.29, 20.39. HRMS (ESI): *m/z* for C<sub>11</sub>H<sub>8</sub>O<sub>4</sub> [M+H]<sup>+</sup> calcd 205.0423, found 205.0478.

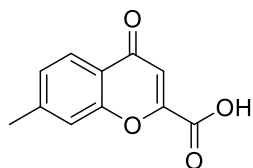

**7-methyl-4-oxo-4H-chromene-2-carboxylic acid (1c):** 89% yield, white solid. Mp:213-214°C. <sup>1</sup>H NMR (400 MHz, DMSO-d<sub>6</sub>) δ 7.93 (d, *J*= 8.1 Hz, 1H), 7.53 (s, 1H), 7.35 (d, *J*= 8.1 Hz, 1H), 6.87 (s, 1H), 2.48 (s, 3H). <sup>13</sup>C NMR (100 MHz, DMSO-d<sub>6</sub>) δ 177.26, 161.43, 155.50, 152.99, 146.26, 127.38, 124.63, 121.51, 118.29, 113.44, 21.21. HRMS (ESI): *m/z* for C<sub>11</sub>H<sub>8</sub>O<sub>4</sub> [M+H]<sup>+</sup> calcd 205.0423, found 205.0481.

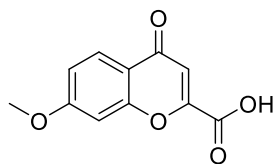

**7-methoxy-4-oxo-4H-chromene-2-carboxylic acid (1d):** 87% yield, white solid. Mp:215-217°C. <sup>1</sup>H NMR (400 MHz, DMSO-d<sub>6</sub>) δ 7.96 (d, *J* = 8.9 Hz, 1H), 7.24 (d, *J* = 2.2 Hz, 1H), 7.12 (dd, *J* = 8.9, 2.3 Hz, 1H), 6.86 (s, 1H), 3.93 (s, 3H). <sup>13</sup>C NMR (100 MHz, DMSO-d<sub>6</sub>) δ 176.59, 164.51, 161.39, 157.38, 152.90, 126.31, 117.60, 115.52, 113.64, 100.96, 56.24. HRMS (ESI): *m/z* for C<sub>11</sub>H<sub>8</sub>O<sub>5</sub> [M+H]<sup>+</sup> calcd 221.0372, found 221.0430.

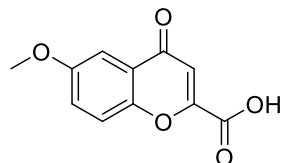

**6-methoxy-4-oxo-4H-chromene-2-carboxylic acid (1e):** 88% yield, white solid. Mp:212-213°C. <sup>1</sup>H NMR (400 MHz, DMSO-d<sub>6</sub>) δ 7.72 (d, *J* = 9.2 Hz, 1H), 7.48 (dd, *J* = 9.2, 3.1 Hz, 1H), 7.42 (d, *J* = 3.0 Hz, 1H), 6.90 (s, 1H), 3.88 (s, 3H). <sup>13</sup>C NMR (100 MHz, DMSO-d<sub>6</sub>) δ 177.25, 161.44, 156.97, 152.97, 150.15, 124.38, 120.52, 112.52, 104.51, 55.79. HRMS (ESI): *m/z* for C<sub>11</sub>H<sub>8</sub>O<sub>5</sub> [M+H]<sup>+</sup> calcd 221.0372, found 221.0428.

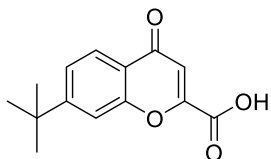

**7-(tert-butyl)-4-oxo-4H-chromene-2-carboxylic acid (1f):** 86% yield, white solid. Mp:204-205°C. <sup>1</sup>H NMR (400 MHz, DMSO-d<sub>6</sub>) δ 7.98 (d, *J* = 8.2 Hz, 1H), 7.62 (d, *J* = 9.0 Hz, 2H), 6.89 (s, 1H), 1.36 (s, 9H). <sup>13</sup>C NMR (100 MHz, DMSO-d<sub>6</sub>) δ 177.21, 161.44, 158.89, 155.48, 153.12, 124.57, 123.78, 121.48, 114.86, 113.50, 35.22, 30.52. HRMS (ESI): *m/z* for C<sub>14</sub>H<sub>14</sub>O<sub>4</sub> [M+H]<sup>+</sup> calcd 247.0892, found 247.0949.

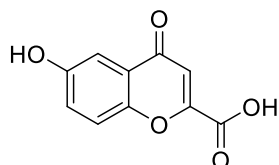

**6-hydroxy-4-oxo-4H-chromene-2-carboxylic acid (1g):** 75% yield, white solid. Mp:275-276°C. <sup>1</sup>H NMR (400 MHz, DMSO-d<sub>6</sub>) δ 10.18 (s, 1H), 7.67-7.57 (m, 1H), 7.30 (d, *J* = 2.7 Hz, 2H), 6.84 (s, 1H). <sup>13</sup>C NMR (100 MHz, DMSO-d<sub>6</sub>) δ 177.36, 161.54, 155.32, 152.81, 149.10, 124.70, 124.14, 120.27, 112.22, 107.28. HRMS (ESI): *m/z* for C<sub>10</sub>H<sub>6</sub>O<sub>5</sub> [M+H]<sup>+</sup> calcd 207.0215, found 207.0275.

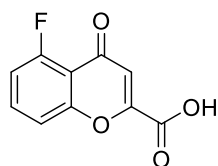

**5-fluoro-4-oxo-4H-chromene-2-carboxylic acid (1h):** 90% yield, white solid. Mp:207-208°C. <sup>1</sup>H NMR (400 MHz, DMSO-d<sub>6</sub>) δ 7.85 (dd, *J* = 14.2, 8.3 Hz, 1H), 7.55 (d, *J* = 8.5 Hz, 1H), 7.30 (dd, *J* = 10.3, 8.9 Hz, 1H), 6.82 (s, 1H). <sup>13</sup>C NMR (100 MHz, DMSO-d<sub>6</sub>) δ 181.07, 166.37, 165.97, 163.36, 161.57, 157.47, 140.59, 120.10, 119.76, 119.29, 117.76, 117.56. <sup>19</sup>F NMR (100 MHz, DMSO-d<sub>6</sub>) -112.82. HRMS (ESI): *m/z* for C<sub>10</sub>H<sub>5</sub>FO<sub>4</sub> [M+H]<sup>+</sup> calcd 209.0172, found 209.0230.

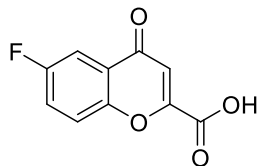

**6-fluoro-4-oxo-4H-chromene-2-carboxylic acid (1i):** 89% yield, white solid. Mp:196-197°C. <sup>1</sup>H NMR (400 MHz, DMSO-d<sub>6</sub>) δ 7.87 (dd, *J* = 9.2, 4.3 Hz, 1H), 7.82-7.76 (m, 1H), 7.74 (dd, *J* = 8.3, 3.0 Hz, 1H), 6.93 (s, 1H). <sup>13</sup>C NMR (100 MHz, DMSO-d<sub>6</sub>) δ 177.02, 161.25, 160.43, 158.00, 153.52, 151.90, 124.91, 123.44, 123.19, 121.78, 112.61, 109.63, 109.40. <sup>19</sup>F NMR (100 MHz, DMSO-d<sub>6</sub>) δ -114.53. HRMS (ESI): *m/z* for C<sub>10</sub>H<sub>5</sub>FO<sub>4</sub> [M+H]<sup>+</sup> calcd 209.0172, found 209.0230.

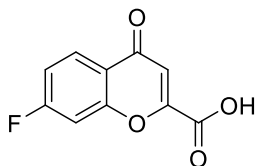

**7-fluoro-4-oxo-4H-chromene-2-carboxylic acid (1j):** 86% yield, white solid. Mp:205-206°C. <sup>1</sup>H NMR (400 MHz, DMSO-d<sub>6</sub>) δ 8.12 (dd, *J* = 8.7, 6.5 Hz, 1H), 7.74 (dd, *J* = 9.6, 2.0 Hz, 1H), 7.43 (td, *J* = 8.7, 2.1 Hz, 1H), 6.92 (s, 1H). <sup>13</sup>C NMR (100 MHz, DMSO-d<sub>6</sub>) δ 176.66, 166.71, 164.19, 161.14, 156.55, 153.53, 127.79, 120.89, 114.81, 114.58, 113.65, 105.74, 105.48. <sup>19</sup>F NMR (100 MHz, DMSO-d<sub>6</sub>) δ -101.99. HRMS (ESI): *m/z* for C<sub>10</sub>H<sub>5</sub>FO<sub>4</sub> [M+H]<sup>+</sup> calcd 209.0172, found 209.0231.

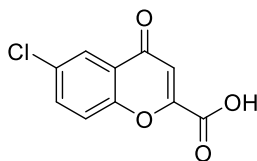

**6-chloro-4-oxo-4H-chromene-2-carboxylic acid (1k):** 85% yield, white solid. Mp:217-218°C. <sup>1</sup>H NMR (400 MHz, DMSO-d<sub>6</sub>) δ 7.99 (d, *J* = 2.2 Hz, 1H), 7.92 (dd, *J* = 9.0, 2.5 Hz, 1H), 7.82 (d, *J* = 9.0 Hz, 1H), 6.95 (s, 1H). <sup>13</sup>C NMR (100 MHz, DMSO-d<sub>6</sub>) δ 176.58, 161.17, 154.03, 153.54, 135.00, 130.51, 124.82, 123.88, 121.41, 113.35. HRMS (ESI): *m/z* for C<sub>10</sub>H<sub>5</sub>ClO<sub>4</sub> [M+H]<sup>+</sup> calcd 224.9876, found 224.9933.

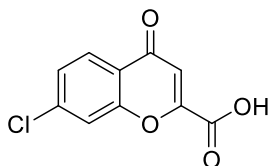

**7-chloro-4-oxo-4H-chromene-2-carboxylic acid (1l):** 87% yield, white solid. Mp:209-211°C. <sup>1</sup>H NMR (400 MHz, DMSO-d<sub>6</sub>) δ 8.05 (d, *J* = 8.6 Hz, 1H), 7.96 (d, *J* = 1.6 Hz, 1H), 7.59 (dd, *J* = 8.6, 1.7 Hz, 1H), 6.93 (s, 1H). <sup>13</sup>C NMR (100 MHz, DMSO-d<sub>6</sub>) δ 176.89, 161.14, 155.68, 153.45, 139.43, 126.66, 122.56,

118.75, 113.75. HRMS (ESI):  $m/z$  for  $C_{10}H_5ClO_4$   $[M+H]^+$  calcd 224.9876, found 224.9932.

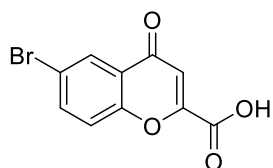

**6-bromo-4-oxo-4H-chromene-2-carboxylic acid (1m):** 83% yield, white solid. Mp:209-211°C.  $^1H$  NMR (400 MHz, DMSO- $d_6$ )  $\delta$  8.11 (d,  $J = 2.4$  Hz, 1H), 8.02 (dd,  $J = 8.9, 2.5$  Hz, 1H), 7.73 (d,  $J = 8.9$  Hz, 1H), 6.95 (s, 1H).  $^{13}C$  NMR (100 MHz, DMSO- $d_6$ )  $\delta$  176.46, 171.96, 161.17, 154.43, 153.55, 137.73, 127.01, 125.21, 121.59, 118.49, 113.47, 21.02. HRMS (ESI):  $m/z$  for  $C_{10}H_5BrO_4$   $[M+H]^+$  calcd 268.9371, found 268.9430.

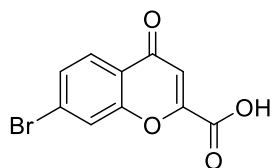

**7-bromo-4-oxo-4H-chromene-2-carboxylic acid (1n):** 82% yield, white solid. Mp:198-199°C.  $^1H$  NMR (400 MHz, DMSO- $d_6$ )  $\delta$  8.08 (d,  $J = 1.6$  Hz, 1H), 7.96 (d,  $J = 8.5$  Hz, 1H), 7.72 (dd,  $J = 8.5, 1.7$  Hz, 1H), 6.93 (s, 1H).  $^{13}C$  NMR (100 MHz, DMSO- $d_6$ )  $\delta$  177.01, 161.13, 155.59, 153.31, 129.34, 128.21, 126.72, 122.83, 121.65, 113.77. HRMS (ESI):  $m/z$  for  $C_{10}H_5BrO_4$   $[M+H]^+$  calcd 268.9371, found 268.9428.

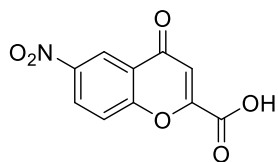

**6-nitro-4-oxo-4H-chromene-2-carboxylic acid (1o):** 85% yield, white solid. Mp:236-237°C.  $^1H$  NMR (400 MHz, DMSO- $d_6$ )  $\delta$  8.70 (d,  $J = 2.8$  Hz, 1H), 8.60 (dd,  $J = 9.2, 2.8$  Hz, 1H), 7.99 (d,  $J = 9.2$  Hz, 1H), 7.01 (s, 1H).  $^{13}C$  NMR (100 MHz, DMSO- $d_6$ )  $\delta$  176.85, 160.95, 158.45, 153.93, 144.63, 129.14, 123.71, 121.20, 120.90, 113.71. HRMS (ESI):  $m/z$  for  $C_{10}H_5NO_6$   $[M+H]^+$  calcd 236.0117, found 236.0183.

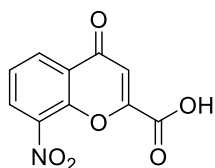

**8-nitro-4-oxo-4H-chromene-2-carboxylic acid (1p):** 78% yield, white solid. Mp:203-204°C.  $^1H$  NMR (400 MHz, DMSO- $d_6$ )  $\delta$  8.54 (dd,  $J = 7.9, 1.5$  Hz, 1H), 8.36 (dd,  $J = 8.0, 1.5$  Hz, 1H), 7.70 (t,  $J = 8.0$  Hz, 1H), 7.03 (s, 1H).  $^{13}C$  NMR (100 MHz, DMSO- $d_6$ )  $\delta$  176.20, 160.77, 153.28, 147.48, 139.11, 130.60, 125.49, 125.27, 114.18. HRMS (ESI):  $m/z$  for  $C_{10}H_5NO_6$   $[M+H]^+$  calcd 236.0117, found 236.0171.

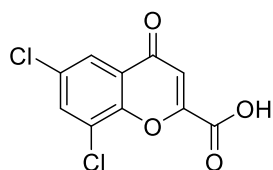



**6,8-dichloro-4-oxo-4H-chromene-2-carboxylic acid (1q):** 73% yield, white solid. Mp:202-203°C. <sup>1</sup>H NMR (400 MHz, DMSO-d<sub>6</sub>) δ 8.26 (d, *J* = 2.0 Hz, 1H), 7.94 (d, *J* = 2.0 Hz, 1H), 6.99 (s, 1H). <sup>13</sup>C NMR (100 MHz, DMSO-d<sub>6</sub>) δ 176.22, 160.89, 153.58, 150.19, 134.49, 130.22, 125.81, 124.35, 123.09, 113.62. HRMS (ESI): *m/z* for C<sub>10</sub>H<sub>4</sub>Cl<sub>2</sub>O<sub>4</sub> [M+H]<sup>+</sup> calcd 258.9487, found 258.9536.

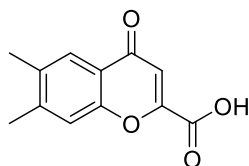

**6,7-dimethyl-4-oxo-4H-chromene-2-carboxylic acid (1r):** 87% yield, white solid. Mp:210-211°C. <sup>1</sup>H NMR (400 MHz, DMSO-d<sub>6</sub>) δ 7.79 (s, 1H), 7.54 (s, 1H), 6.85 (s, 1H), 2.39 (s, 3H), 2.34 (s, 3H). <sup>13</sup>C NMR (100 MHz, DMSO-d<sub>6</sub>) δ 177.27, 161.51, 153.98, 152.96, 145.60, 135.27, 124.29, 121.63, 118.64, 113.32, 19.86, 18.86. HRMS (ESI): *m/z* for C<sub>12</sub>H<sub>10</sub>O<sub>4</sub> [M+H]<sup>+</sup> calcd 219.0579, found 219.0635.

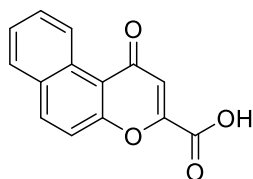

**1-oxo-1H-benzo[f]chromene-3-carboxylic acid (1s):** 84% yield, white solid. Mp:220-221°C. <sup>1</sup>H NMR (400 MHz, DMSO-d<sub>6</sub>) δ 9.87 (d, *J* = 8.5 Hz, 1H), 8.40 (d, *J* = 9.2 Hz, 1H), 8.14 (d, *J* = 7.9 Hz, 1H), 7.81 (dd, *J* = 17.0, 8.7 Hz, 2H), 7.72 (t, *J* = 7.5 Hz, 1H), 7.06 (s, 1H). <sup>13</sup>C NMR (100 MHz, DMSO-d<sub>6</sub>) δ 179.27, 161.28, 157.01, 150.99, 136.72, 130.35, 129.37, 128.67, 127.00, 125.79, 118.04, 117.00, 116.49. HRMS (ESI): *m/z* for C<sub>14</sub>H<sub>8</sub>O<sub>4</sub> [M+H]<sup>+</sup> calcd 241.0423, found 241.0480.

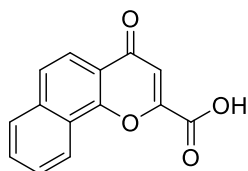

**4-oxo-4H-benzo[h]chromene-2-carboxylic acid (1t):** 86% yield, white solid. Mp:256-257°C. <sup>1</sup>H NMR (400 MHz, DMSO-d<sub>6</sub>) δ 8.52-8.50 (m, 1H), 8.14 (dd, *J* = 6.1, 2.0 Hz, 1H), 7.98 (s, 2H), 7.92-7.78 (m, 2H), 7.07 (s, 1H). <sup>13</sup>C NMR (100 MHz, DMSO-d<sub>6</sub>) δ 177.16, 161.37, 152.69, 135.59, 130.00, 128.27, 127.90, 125.98, 123.34, 122.03, 120.25, 119.71, 114.78. HRMS (ESI): *m/z* for C<sub>14</sub>H<sub>8</sub>O<sub>4</sub> [M+H]<sup>+</sup> calcd 241.0423, found 241.0477.

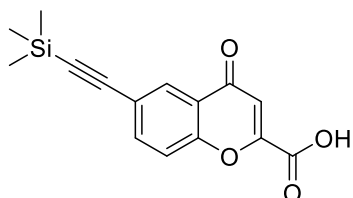

**4-oxo-6-((trimethylsilyl)ethynyl)-4H-chromene-2-carboxylic acid (1u):** 40% yield, light yellow solid.

Mp: 217-218°C.  $^1\text{H}$  NMR (400 MHz, DMSO- $d_6$ )  $\delta$  8.01 (d,  $J = 1.6$  Hz, 1H), 7.89 (dd,  $J = 8.7, 1.8$  Hz, 1H), 7.74 (d,  $J = 8.7$  Hz, 1H), 6.93 (s, 1H), 0.26 (s, 9H).  $^{13}\text{C}$  NMR (100 MHz, DMSO- $d_6$ )  $\delta$  177.03, 161.45, 155.41, 153.74, 137.70, 128.39, 124.02, 120.11, 113.83, 103.42, 96.17, 0.00. HRMS (ESI):  $m/z$  for  $\text{C}_{15}\text{H}_{14}\text{O}_4\text{Si}$   $[\text{M}+\text{H}]^+$  calcd 287.0661, found 287.0715.

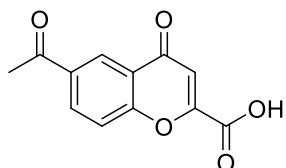

**6-acetyl-4-oxo-4H-chromene-2-carboxylic acid (1v):** 87% yield, white solid. Mp: 255-256°C.  $^1\text{H}$  NMR (400 MHz, DMSO- $d_6$ )  $\delta$  8.57 (d,  $J = 1.6$  Hz, 1H), 8.35 (dd,  $J = 8.8, 1.8$  Hz, 1H), 7.86 (d,  $J = 8.8$  Hz, 1H), 6.98 (s, 1H), 2.69 (s, 3H).  $^{13}\text{C}$  NMR (100 MHz, DMSO- $d_6$ )  $\delta$  196.49, 177.48, 161.18, 157.89, 153.59, 133.93, 125.81, 123.39, 119.65, 113.78, 26.81. HRMS (ESI):  $m/z$  for  $\text{C}_{12}\text{H}_8\text{O}_5$   $[\text{M}-\text{H}]^-$  calcd 231.0372, found 231.0308.

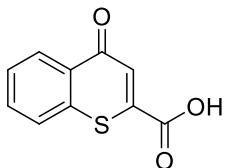

**4-oxo-4H-thiochromene-2-carboxylic acid (1w):** 68% yield, light yellow solid. Mp: 225-227°C.  $^1\text{H}$  NMR (400 MHz, DMSO- $d_6$ )  $\delta$  8.34 (dd,  $J = 8.1, 1.1$  Hz, 1H), 8.00 (d,  $J = 8.1$  Hz, 1H), 7.84-7.80 (m, 1H), 7.70-7.66 (m, 1H), 7.49 (s, 1H).  $^{13}\text{C}$  NMR (100 MHz, DMSO- $d_6$ )  $\delta$  180.19, 163.82, 143.30, 136.95, 132.71, 130.51, 128.55, 127.93, 127.66. HRMS (ESI):  $m/z$  for  $\text{C}_{10}\text{H}_6\text{O}_3\text{S}$   $[\text{M}-\text{H}]^-$  calcd 205.0038, found 204.9982.

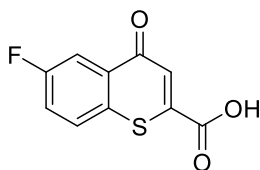

**7-fluoro-4-oxo-4H-thiochromene-2-carboxylic acid (1x):** 78% yield, light yellow solid. Mp: 228-230°C.  $^1\text{H}$  NMR (400 MHz, DMSO- $d_6$ )  $\delta$  8.15 (dd,  $J = 8.9, 5.0$  Hz, 1H), 8.02 (dd,  $J = 9.5, 2.7$  Hz, 1H), 7.79 (td,  $J = 8.6, 2.8$  Hz, 1H), 7.50 (s, 1H).  $^{13}\text{C}$  NMR (100 MHz, DMSO- $d_6$ )  $\delta$  179.46, 163.68, 163.02, 160.55, 143.94, 132.93, 132.53, 130.98, 126.78, 121.60, 121.36, 112.86, 112.63. HRMS (ESI):  $m/z$  for  $\text{C}_{10}\text{H}_5\text{FO}_3\text{S}$   $[\text{M}+\text{H}]^+$  calcd 224.9943, found 224.9994.

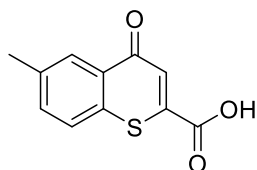

**7-methyl-4-oxo-4H-thiochromene-2-carboxylic acid (1y):** 78% yield, light yellow solid. Mp: 244-246°C.  $^1\text{H}$  NMR (400 MHz, DMSO- $d_6$ )  $\delta$  8.15 (s, 1H), 7.89 (d,  $J = 8.3$  Hz, 1H), 7.65 (d,  $J = 7.2$  Hz, 1H),

7.47 (s, 1H), 2.47 (s, 3H). <sup>13</sup>C NMR (100 MHz, DMSO-d<sub>6</sub>) δ 180.02, 163.85, 143.09, 138.51, 133.94, 130.37, 127.73, 127.21, 20.78. HRMS (ESI): *m/z* for C<sub>11</sub>H<sub>8</sub>O<sub>3</sub>S [M+H]<sup>+</sup> calcd 221.0194, found 221.0249.

### 3. Asymmetric hydrogenation of chromone-2-carboxylic acids

#### 3.1 General procedure of asymmetric hydrogenation

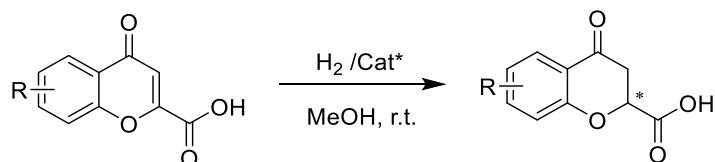

A solution of SL-J216-1 (1.41mg, 0.0022 mmol) and Rh(nbd)<sub>2</sub>BF<sub>4</sub> (0.46 mg, 0.002 mmol) in MeOH (1 mL) was stirred under nitrogen atmosphere. After 30 min, the clear yellow solution was transferred into a hydrogenation tube equipped with a stir bar, and the 4-oxo-4*H*-chromene-2-carboxylic acids was added. The hydrogenation tube was then put into an autoclave. The air in the autoclave was replaced with hydrogen for three times. The autoclave was then charged with hydrogen to 20 atm, and the reaction mixture was stirred at room temperature for 20 h. After releasing the hydrogen, the reaction mixture was concentrated on a rotary evaporator. The conversion of substrate was determined by <sup>1</sup>H NMR analysis. The crude product was purified by flash chromatography on silica gel column to give the pure product. The product was reacted with trimethylsilyl diazomethane (1.1 eq) in THF to afford the corresponding methyl ester. After a flash chromatography on neutral Al<sub>2</sub>O<sub>3</sub> column, the desired methyl ester was obtained and the *ee* values of the products were determined by chiral HPLC.

#### 3.2 Ligands screening in asymmetric hydrogenation

**Table S1** Screening of ligands and metal precursors in asymmetric hydrogenation<sup>a</sup>

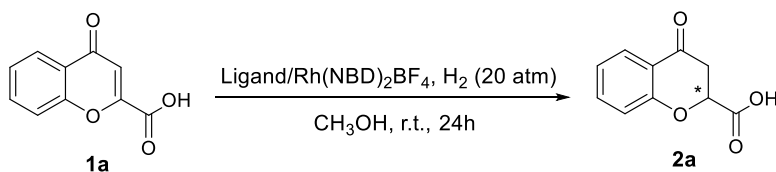

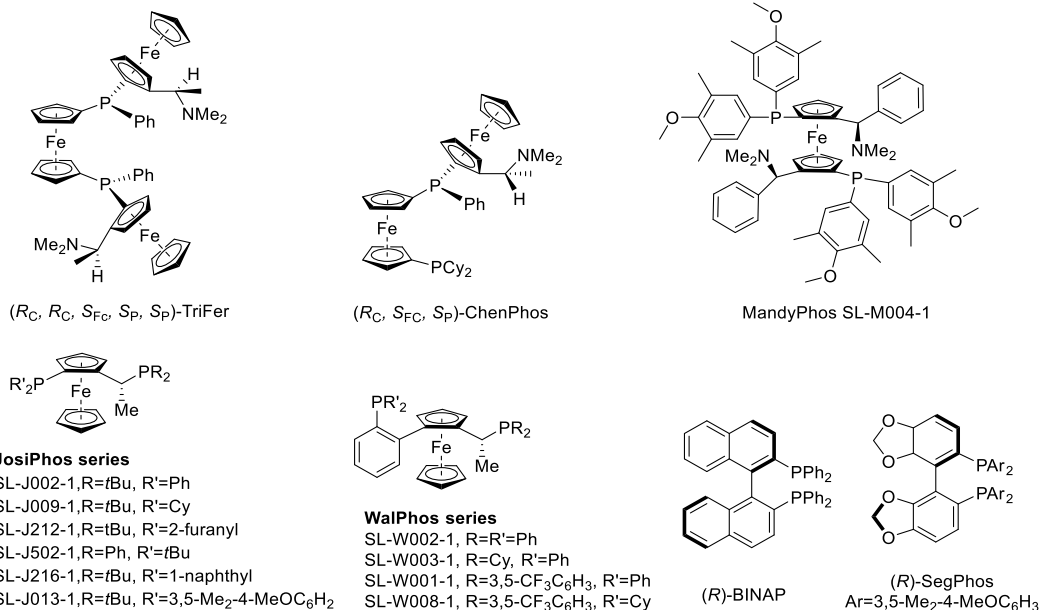

| entry    | ligand               | metal precursor                            | yield (%) <sup>b</sup> | ee (%) <sup>c</sup> |
|----------|----------------------|--------------------------------------------|------------------------|---------------------|
| 1        | ChenPhos             | [Rh(NBD) <sub>2</sub> ]BF <sub>4</sub>     | 63                     | 62                  |
| 2        | TriFer               | [Rh(NBD) <sub>2</sub> ]BF <sub>4</sub>     | 80                     | 85                  |
| 3        | SL-M004-1            | [Rh(NBD) <sub>2</sub> ]BF <sub>4</sub>     | 75                     | 50                  |
| 4        | SL-J002-1            | [Rh(NBD) <sub>2</sub> ]BF <sub>4</sub>     | 92                     | 71                  |
| 5        | SL-J009-1            | [Rh(NBD) <sub>2</sub> ]BF <sub>4</sub>     | 20                     | 84                  |
| 6        | SL-J212-1            | [Rh(NBD) <sub>2</sub> ]BF <sub>4</sub>     | 92                     | 85                  |
| 7        | SL-J502-1            | [Rh(NBD) <sub>2</sub> ]BF <sub>4</sub>     | 86                     | 66                  |
| <b>8</b> | <b>SL-J216-1</b>     | <b>[Rh(NBD)<sub>2</sub>]BF<sub>4</sub></b> | <b>97</b>              | <b>99</b>           |
| 9        | SL-J013-1            | [Rh(NBD) <sub>2</sub> ]BF <sub>4</sub>     | 95                     | 63                  |
| 10       | SL-W008-1            | [Rh(NBD) <sub>2</sub> ]BF <sub>4</sub>     | 90                     | 80                  |
| 11       | SL-W002-1            | [Rh(NBD) <sub>2</sub> ]BF <sub>4</sub>     | 93                     | 53                  |
| 12       | SL-W003-1            | [Rh(NBD) <sub>2</sub> ]BF <sub>4</sub>     | 92                     | 33                  |
| 13       | SL-W001-1            | [Rh(NBD) <sub>2</sub> ]BF <sub>4</sub>     | 83                     | 55                  |
| 14       | ( <i>R</i> )-BINAP   | [Rh(NBD) <sub>2</sub> ]BF <sub>4</sub>     | 15                     | 19                  |
| 15       | ( <i>R</i> )-SegPhos | [Rh(NBD) <sub>2</sub> ]BF <sub>4</sub>     | 20                     | 15                  |
| 16       | SL-J216-1            | [Rh(COD)Cl] <sub>2</sub>                   | 50                     | 99                  |
| 17       | SL-J216-1            | [Rh(NBD)Cl] <sub>2</sub>                   | 75                     | 99                  |
| 18       | SL-J216-1            | [Ir(COD)Cl] <sub>2</sub>                   | NR <sup>d</sup>        |                     |
| 19       | SL-J216-1            | Ru(PPh <sub>3</sub> ) <sub>4</sub> Cl      | Trace                  | ND <sup>e</sup>     |

<sup>a</sup> Reaction conditions: 0.2 mmol scale, [substrate]=0.1 mol L<sup>-1</sup>, solvent=2 mL, 1.0 mol% of catalyst (M/L=1:1.1). <sup>b</sup> Obtained after flash column chromatography. <sup>c</sup> Determined by chiral HPLC analysis on a chiral stationary phase. <sup>d</sup> No reaction. <sup>e</sup> Not determined.

#### 4. Analytical Data of Hydrogenation Products

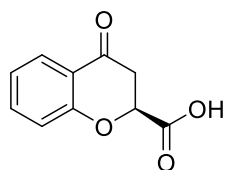

**(S)-4-oxochromane-2-carboxylic acid (2a):** White solid, 97% yield, 99% *ee*. Mp:154-156°C.  $[\alpha]_D^{20} = +72.1$  (*c* 0.21, CH<sub>2</sub>Cl<sub>2</sub>). <sup>1</sup>H NMR (400 MHz, DMSO-*d*<sub>6</sub>)  $\delta$  13.45 (s, 1H), 7.74 (dd, *J* = 7.8, 1.4 Hz, 1H), 7.67-7.56 (m, 1H), 7.21-6.99 (m, 2H), 5.34 (dd, *J* = 7.4, 5.3 Hz, 1H), 3.12 (dd, *J* = 17.0, 5.2 Hz, 1H), 2.98 (dd, *J* = 17.0, 7.5 Hz, 1H). <sup>13</sup>C NMR (100 MHz, DMSO-*d*<sub>6</sub>)  $\delta$  189.84, 170.37, 160.00, 136.36, 126.09, 121.57, 120.65, 117.95, 74.50. HRMS (ESI): *m/z* for C<sub>10</sub>H<sub>8</sub>O<sub>4</sub> [M+H]<sup>+</sup> calcd 193.0423, found 193.0493. HPLC condition: Chiralcel OD-H column (25 cm × 0.46 cm ID), hexane/2-propanol=90:10, flow rate=1.0 mL/min, 254 nm UV detector, *t*<sub>R</sub>=14.80 min for major isomer, and *t*<sub>R</sub>=21.58 min for minor isomer.

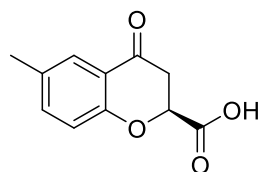

**(S)-6-methyl-4-oxochromane-2-carboxylic acid (2b):** White solid, 92% yield, 98% *ee*. Mp:158-160°C.  $[\alpha]_D^{20} = +59.5$  (*c*=0.13 in MeOH). <sup>1</sup>H NMR (400 MHz, DMSO-*d*<sub>6</sub>)  $\delta$  13.38 (s, 1H), 7.52 (s, 1H), 7.41 (d, *J* = 8.4 Hz, 1H), 7.00 (d, *J* = 8.4 Hz, 1H), 5.27 (dd, *J* = 7.3, 5.4 Hz, 1H), 3.07 (dd, *J* = 17.0, 5.2 Hz, 1H), 2.94 (dd, *J* = 17.0, 7.5 Hz, 1H), 2.27 (s, 3H). <sup>13</sup>C NMR (100 MHz, DMSO-*d*<sub>6</sub>)  $\delta$  189.89, 170.43, 158.07, 137.20, 130.60, 125.61, 120.27, 117.78, 74.47, 19.88. HRMS (ESI): *m/z* for C<sub>11</sub>H<sub>10</sub>O<sub>4</sub> [M+H]<sup>+</sup> calcd 207.0579, found 207.0641. HPLC condition: Chiralcel AS-H column (25 cm × 0.46 cm ID), hexane/2-propanol=90:10, flow rate=1.0 mL/min, 254 nm UV detector, *t*<sub>R</sub>=13.58 min for major isomer, and *t*<sub>R</sub>=20.40 min for minor isomer.

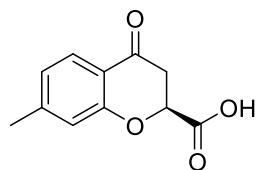

**(S)-7-methyl-4-oxochromane-2-carboxylic acid (2c):** White solid, 93% yield, 98% *ee*. Mp:169-170°C.  $[\alpha]_D^{20} = +37.3$  (*c*=0.13 in MeOH). <sup>1</sup>H NMR (400 MHz, DMSO-*d*<sub>6</sub>)  $\delta$  13.41 (s, 1H), 7.62 (d, *J* = 7.8 Hz, 1H), 6.93-6.90 (m, 2H), 5.30 (d, *J* = 4.8 Hz, 1H), 3.10-3.06 (m, 1H), 2.92 (dd, *J* = 17.0, 7.1 Hz, 1H), 2.34 (s, 3H). <sup>13</sup>C NMR (100 MHz, DMSO-*d*<sub>6</sub>)  $\delta$  189.35, 170.47, 160.02, 147.47, 126.00, 122.80, 118.44, 117.81, 74.48, 21.34. HRMS (ESI): *m/z* for C<sub>11</sub>H<sub>10</sub>O<sub>4</sub> [M+H]<sup>+</sup> calcd 207.0579, found 207.0643. HPLC condition: Chiralcel OD-H column (25 cm × 0.46 cm ID), hexane/2-propanol=90:10, flow rate=1.0 mL/min, 254 nm UV detector, *t*<sub>R</sub>=13.18 min for major isomer, and *t*<sub>R</sub>=18.00 min for minor isomer.

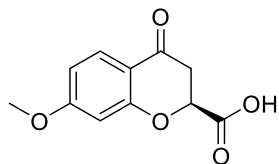

**(S)-7-methoxy-4-oxochromane-2-carboxylic acid (2d):** Brown solid, 93% yield, 99% *ee*. Mp:169-171°C.  $[\alpha]_D^{20} = -0.7$  ( $c=0.13$  in MeOH).  $^1\text{H NMR}$  (400 MHz, DMSO- $d_6$ )  $\delta$  13.37 (s, 1H), 7.66 (d,  $J = 8.6$  Hz, 1H), 6.66-6.62 (m, 2H), 5.30-5.27 (m, 1H), 3.83 (s, 3H), 3.01 (dd,  $J = 17.0, 5.0$  Hz, 1H), 2.89 (dd,  $J = 16.9, 7.4$  Hz, 1H).  $^{13}\text{C NMR}$  (100 MHz, DMSO- $d_6$ )  $\delta$  188.23, 170.40, 165.71, 162.05, 127.88, 114.44, 109.97, 101.04, 74.78, 55.84. HRMS (ESI):  $m/z$  for  $\text{C}_{11}\text{H}_{10}\text{O}_5$   $[\text{M}+\text{H}]^+$  calcd 223.0528, found 223.0586. HPLC condition: Chiralcel OD-H column (25 cm  $\times$  0.46 cm ID), hexane/2-propanol=90:10, flow rate=1.0 mL/min, 254 nm UV detector,  $t_R=22.93$  min for major isomer, and  $t_R=30.06$  min for minor isomer.

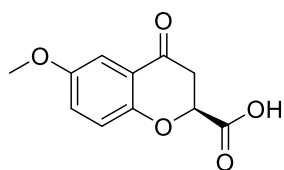

**(S)-6-methoxy-4-oxochromane-2-carboxylic acid (2e):** White solid, 92% yield, 97% *ee*. Mp:150-152°C.  $[\alpha]_D^{20} = +37.2$  ( $c=0.17$  in MeOH).  $^1\text{H NMR}$  (400 MHz, DMSO- $d_6$ )  $\delta$  13.40 (s, 1H), 7.28-7.11 (m, 2H), 7.06 (d,  $J = 8.9$  Hz, 1H), 5.27-5.24 (m, 1H), 3.75 (s, 3H), 3.07 (dd,  $J = 17.1, 4.9$  Hz, 1H), 2.96 (dd,  $J = 17.0, 7.6$  Hz, 1H).  $^{13}\text{C NMR}$  (100 MHz, DMSO- $d_6$ )  $\delta$  189.81, 170.46, 154.47, 153.70, 124.62, 120.57, 119.34, 107.16, 74.55. HRMS (ESI):  $m/z$  for  $\text{C}_{11}\text{H}_{10}\text{O}_5$   $[\text{M}+\text{H}]^+$  calcd 223.0528, found 223.0590. HPLC condition: Chiralcel OD-H column (25 cm  $\times$  0.46 cm ID), hexane/2-propanol=90:10, flow rate=1.0 mL/min, 254 nm UV detector,  $t_R=15.70$  min for major isomer, and  $t_R=19.40$  min for minor isomer.

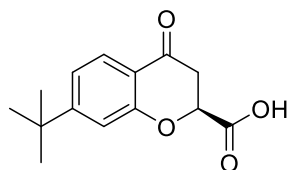

**(S)-7-(tert-butyl)-4-oxochromane-2-carboxylic acid (2f):** White solid, 92% yield, 98% *ee*. Mp:131-133°C.  $[\alpha]_D^{20} = +16.1$  ( $c=0.11$  in MeOH).  $^1\text{H NMR}$  (400 MHz, DMSO- $d_6$ )  $\delta$  13.41 (s, 1H), 7.66 (d,  $J = 8.3$  Hz, 1H), 7.14 (d,  $J = 8.3$  Hz, 1H), 7.05 (d,  $J = 1.2$  Hz, 1H), 5.29 (dd,  $J = 7.8, 5.2$  Hz, 1H), 3.03 (dd,  $J = 16.9, 5.1$  Hz, 1H), 2.93 (dd,  $J = 16.9, 8.0$  Hz, 1H), 1.28 (s, 9H).  $^{13}\text{C NMR}$  (100 MHz, DMSO- $d_6$ )  $\delta$  189.43, 170.37, 160.16, 159.94, 125.86, 119.16, 118.33, 114.22, 74.52, 35.06, 30.53. HRMS (ESI):  $m/z$  for  $\text{C}_{14}\text{H}_{16}\text{O}_4$   $[\text{M}+\text{H}]^+$  calcd 249.1049, found 249.1117. HPLC condition: Chiralcel OD-H column (25 cm  $\times$  0.46 cm ID), hexane/2-propanol=92:8, flow rate=0.8 mL/min, 254 nm UV detector,  $t_R=51.76$  min for major isomer, and  $t_R=57.27$  min for minor isomer.

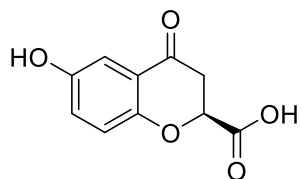

**(S)-6-hydroxy-4-oxochromane-2-carboxylic acid (2g):** Light brown solid, 90% yield, 98% *ee*. Mp:234-236°C.  $[\alpha]_D^{20} = +67.8$  ( $c=0.11$  in MeOH).  $^1\text{H NMR}$  (400 MHz, DMSO- $d_6$ )  $\delta$  13.26 (s, 1H), 9.45 (s, 1H), 7.03 (d,  $J = 11.2$  Hz, 2H), 6.95 (d,  $J = 8.6$  Hz, 1H), 5.2-5.18 (m, 1H), 3.01 (dd,  $J = 17.0, 4.7$  Hz, 1H), 2.91 (dd,  $J = 17.0, 7.9$  Hz, 1H).  $^{13}\text{C NMR}$  (100 MHz, DMSO- $d_6$ )  $\delta$  190.05, 170.55, 153.21, 151.66, 124.57, 120.80, 118.95, 109.72, 74.46. HRMS (ESI):  $m/z$  for  $\text{C}_{10}\text{H}_8\text{O}_5$   $[\text{M}+\text{H}]^+$  calcd 209.0372, found 209.0442. HPLC condition: Chiralcel OD-H column (25 cm  $\times$  0.46 cm ID), hexane/2-propanol=92:8, flow rate=0.8 mL/min, 254 nm UV detector,  $t_R=32.39$  min for minor isomer, and  $t_R=37.42$  min for major isomer.

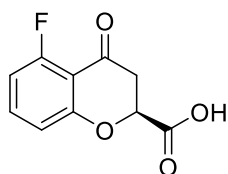

**(S)-5-fluoro-4-oxochromane-2-carboxylic acid (2h):** White solid, 93% yield, 98% *ee*. Mp:156-157°C.  $[\alpha]_D^{20} = +54.0$  ( $c=0.15$  in MeOH).  $^1\text{H NMR}$  (400 MHz, DMSO- $d_6$ )  $\delta$  13.49 (s, 1H), 7.59 (dt,  $J = 14.5, 7.3$  Hz, 1H), 6.96 (d,  $J = 8.3$  Hz, 1H), 6.87 (t,  $J = 9.6$  Hz, 1H), 5.36 (t,  $J = 6.2$  Hz, 1H), 3.11 (dd,  $J = 16.7, 5.1$  Hz, 1H), 2.94 (dd,  $J = 16.8, 7.4$  Hz, 1H).  $^{13}\text{C NMR}$  (100 MHz, DMSO- $d_6$ )  $\delta$  187.52, 170.08, 161.77, 160.84, 159.16, 136.60, 113.91, 110.67, 108.96, 108.76, 74.43. HRMS (ESI):  $m/z$  for  $\text{C}_{10}\text{H}_7\text{FO}_4$   $[\text{M}+\text{H}]^+$  calcd 211.0328, found 211.0401. HPLC condition: Chiralcel OD-H column (25 cm  $\times$  0.46 cm ID), hexane/2-propanol=90:10, flow rate=1.0 mL/min, 254 nm UV detector,  $t_R=20.86$  min for major isomer, and  $t_R=22.63$  min for minor isomer.

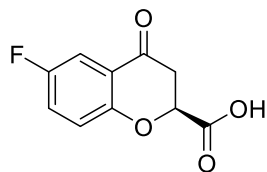

**(S)-6-fluoro-4-oxochromane-2-carboxylic acid (2i):** White solid, 95% yield, 99% *ee*. Mp:161-163°C.  $[\alpha]_D^{20} = +62.2$  ( $c=0.16$  in MeOH).  $^1\text{H NMR}$  (400 MHz, DMSO- $d_6$ )  $\delta$  13.50 (s, 1H), 7.49 (td,  $J = 8.6, 3.2$  Hz, 1H), 7.43 (dd,  $J = 8.4, 3.1$  Hz, 1H), 7.19 (dd,  $J = 9.0, 4.3$  Hz, 1H), 5.34 (dd,  $J = 7.4, 5.3$  Hz, 1H), 3.13 (dd,  $J = 17.1, 5.2$  Hz, 1H), 2.99 (dd,  $J = 17.1, 7.5$  Hz, 1H);  $^{13}\text{C NMR}$  (100 MHz, DMSO- $d_6$ )  $\delta$  189.31, 170.22, 157.79, 156.42, 155.41, 123.91, 123.66, 121.11, 120.17, 110.99, 110.76, 74.67.  $^{19}\text{F NMR}$  (100 MHz, DMSO- $d_6$ )  $\delta$  -121.35. HRMS (ESI):  $m/z$  for  $\text{C}_{10}\text{H}_7\text{FO}_4$   $[\text{M}+\text{H}]^+$  calcd 211.0328, found 211.0404. HPLC condition: Chiralcel AS-H column (25 cm  $\times$  0.46 cm ID), hexane/2-propanol=90:10, flow rate=1.0 mL/min, 254 nm UV detector,  $t_R=14.38$  min for major isomer, and  $t_R=17.74$  min for minor isomer.

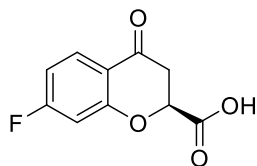

**(S)-7-fluoro-4-oxochromane-2-carboxylic acid (2j):** White solid, 95% yield, 99% *ee*. Mp:148-149°C.  $[\alpha]_D^{20} = +50.9$  ( $c=0.10$  in MeOH).  $^1\text{H NMR}$  (400 MHz, DMSO- $d_6$ )  $\delta$  13.55 (s, 1H), 7.81 (dd,  $J = 8.5, 7.0$  Hz, 1H), 7.04 (dd,  $J = 10.3, 2.2$  Hz, 1H), 6.95 (td,  $J = 8.6, 2.3$  Hz, 1H), 5.39 (t,  $J = 6.2$  Hz, 1H), 3.13 (dd,  $J = 17.1, 5.3$  Hz, 1H), 2.97 (dd,  $J = 17.1, 7.2$  Hz, 1H);  $^{13}\text{C NMR}$  (100 MHz, DMSO- $d_6$ )  $\delta$  188.53, 170.13, 167.97, 165.45, 161.76, 129.00, 117.95, 109.87, 109.64, 104.86, 104.61, 75.04.  $^{19}\text{F NMR}$  (100 MHz, DMSO- $d_6$ )  $\delta$  -101.18. HRMS (ESI):  $m/z$  for  $\text{C}_{10}\text{H}_7\text{FO}_4$   $[\text{M}+\text{H}]^+$  calcd 211.0328, found 211.0404. HPLC condition: Chiralcel AS-H column (25 cm  $\times$  0.46 cm ID), hexane/2-propanol=90:10, flow rate=1.0 mL/min, 254 nm UV detector,  $t_R=15.83$  min for minor isomer, and  $t_R=17.17$  min for major isomer.

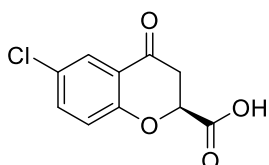

**(S)-6-chloro-4-oxochromane-2-carboxylic acid (2k):** White solid, 93% yield, 99% *ee*. Mp:159-160°C.  $[\alpha]_D^{20} = +71.6$  ( $c=0.10$  in MeOH).  $^1\text{H NMR}$  (400 MHz, DMSO- $d_6$ )  $\delta$  13.53 (s, 1H), 7.64 (d,  $J = 12.3$  Hz, 2H), 7.18 (d,  $J = 8.0$  Hz, 1H), 5.37 (s, 1H), 3.15 (d,  $J = 14.3$  Hz, 1H), 3.00 (dd,  $J = 16.7, 6.4$  Hz, 1H).  $^{13}\text{C NMR}$  (100 MHz, DMSO- $d_6$ )  $\delta$  188.95, 170.13, 158.71, 135.91, 125.75, 125.00, 121.65, 120.35, 74.70. HRMS (ESI):  $m/z$  for  $\text{C}_{10}\text{H}_7\text{ClO}_4$   $[\text{M}+\text{H}]^+$  calcd 227.0033, found 227.0107. HPLC condition: Chiralcel AS-H column (25 cm  $\times$  0.46 cm ID), hexane/2-propanol=90:10, flow rate=1.0 mL/min, 254 nm UV detector,  $t_R=14.86$  min for major isomer, and  $t_R=20.03$  min for minor isomer.

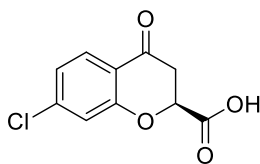

**(S)-7-chloro-4-oxochromane-2-carboxylic acid (2l):** White solid, 92% yield, 98% *ee*. Mp:141-142°C.  $[\alpha]_D^{20} = +25.0$  ( $c=0.10$  in MeOH).  $^1\text{H NMR}$  (400 MHz, DMSO- $d_6$ )  $\delta$  13.56 (s, 1H), 7.74 (d,  $J = 8.4$  Hz, 1H), 7.28 (s, 1H), 7.15 (d,  $J = 8.4$  Hz, 1H), 5.40 (t,  $J = 5.9$  Hz, 1H), 3.16 (dd,  $J = 17.1, 5.2$  Hz, 1H), 2.98 (dd,  $J = 17.1, 6.8$  Hz, 1H).  $^{13}\text{C NMR}$  (100 MHz, DMSO- $d_6$ )  $\delta$  188.93, 170.14, 160.54, 140.51, 127.87, 122.08, 119.62, 117.80, 74.92. HRMS (ESI):  $m/z$  for  $\text{C}_{10}\text{H}_7\text{ClO}_4$   $[\text{M}+\text{H}]^+$  calcd 227.0033, found 227.0106. HPLC condition: Chiralcel AS-H column (25 cm  $\times$  0.46 cm ID), hexane/2-propanol=90:10, flow rate=1.0 mL/min, 254 nm UV detector,  $t_R=13.79$  min for minor isomer, and  $t_R=15.63$  min for major isomer.

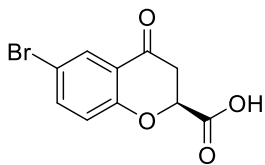



**(S)-6-bromo-4-oxochromane-2-carboxylic acid (2m):** Light yellow solid, 95% yield, 99% *ee*. Mp:167-168°C.  $[\alpha]_D^{20} = +59.0$  ( $c=0.10$  in MeOH).  $^1\text{H NMR}$  (400 MHz, DMSO- $d_6$ )  $\delta$  13.59 (s, 1H), 7.78-7.74 (m, 2H), 7.12 (d,  $J = 8.7$  Hz, 1H), 5.37 (t,  $J = 6.1$  Hz, 1H), 3.15 (dd,  $J = 17.0, 5.1$  Hz, 1H), 2.99 (dd,  $J = 17.1, 7.2$  Hz, 1H).  $^{13}\text{C NMR}$  (100 MHz, DMSO- $d_6$ )  $\delta$  188.85, 170.12, 159.12, 138.65, 128.03, 122.15, 120.67, 113.29, 74.69. HRMS (ESI):  $m/z$  for  $\text{C}_{10}\text{H}_7\text{BrO}_4$   $[\text{M}+\text{H}]^+$  calcd 270.9528, found 270.9602. HPLC condition: Chiralcel AS-H column (25 cm  $\times$  0.46 cm ID), hexane/2-propanol=90:10, flow rate=1.0 mL/min, 254 nm UV detector,  $t_R=15.40$  min for major isomer, and  $t_R=20.18$  min for minor isomer.

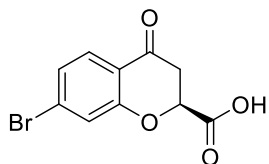

**(S)-7-bromo-4-oxochromane-2-carboxylic acid (2n):** White solid, 93% yield, 98% *ee*. Mp:172-173°C.  $[\alpha]_D^{20} = +10.4$  ( $c=0.11$  in MeOH).  $^1\text{H NMR}$  (400 MHz, DMSO- $d_6$ )  $\delta$  13.57 (s, 1H), 7.65 (d,  $J = 8.4$  Hz, 1H), 7.41 (s, 1H), 7.28 (dd,  $J = 8.4, 0.6$  Hz, 1H), 5.39 (t,  $J = 6.1$  Hz, 1H), 3.16 (dd,  $J = 16.9, 5.6$  Hz, 1H), 2.97 (dd,  $J = 17.1, 6.9$  Hz, 1H).  $^{13}\text{C NMR}$  (100 MHz, DMSO- $d_6$ )  $\delta$  189.12, 170.14, 160.42, 129.52, 127.84, 124.91, 120.73, 119.88, 74.90. HRMS (ESI):  $m/z$  for  $\text{C}_{10}\text{H}_7\text{BrO}_4$   $[\text{M}+\text{H}]^+$  calcd 270.9528, found 270.9600. HPLC condition: Chiralcel AS-H column (25 cm  $\times$  0.46 cm ID), hexane/2-propanol=90:10, flow rate=1.0 mL/min, 254 nm UV detector,  $t_R=14.33$  min for minor isomer, and  $t_R=16.47$  min for major isomer.

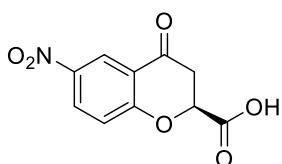

**(S)-6-nitro-4-oxochromane-2-carboxylic acid (2o):** Yellow solid, 87% yield, 83% *ee*. Mp:179-180°C.  $[\alpha]_D^{20} = +56.5$  ( $c=0.10$  in MeOH).  $^1\text{H NMR}$  (400 MHz, DMSO- $d_6$ )  $\delta$  13.72 (s, 1H), 8.46-8.40 (m, 2H), 7.38 (d,  $J = 9.1$  Hz, 1H), 5.56 (t,  $J = 6.1$  Hz, 1H), 3.29 (dd,  $J = 17.1, 5.5$  Hz, 1H), 3.09 (dd,  $J = 17.1, 6.8$  Hz, 1H).  $^{13}\text{C NMR}$  (100 MHz, DMSO- $d_6$ )  $\delta$  187.70, 168.88, 163.31, 140.69, 129.74, 121.00, 119.43, 118.82, 74.42. HRMS (ESI):  $m/z$  for  $\text{C}_{10}\text{H}_7\text{NO}_6$   $[\text{M}-\text{H}]^-$  calcd 236.0273, found 236.0198. HPLC condition: Chiralcel OD-H column (25 cm  $\times$  0.46 cm ID), hexane/2-propanol=90:10, flow rate=1.0 mL/min, 254 nm UV detector,  $t_R=58.00$  min for major isomer, and  $t_R=67.67$  min for minor isomer.

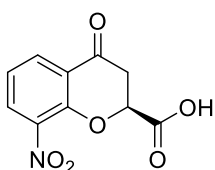

**(S)-8-nitro-4-oxochromane-2-carboxylic acid (2p):** Yellow solid, 89% yield, 87% *ee*. Mp:180-181°C.  $[\alpha]_D^{20} = -106.2$  ( $c=0.13$  in MeOH).  $^1\text{H NMR}$  (400 MHz, DMSO- $d_6$ )  $\delta$  13.73 (s, 1H), 8.24 (d,  $J = 7.9$  Hz, 1H), 8.05 (d,  $J = 7.6$  Hz, 1H), 7.27 (t,  $J = 7.9$  Hz, 1H), 5.60 (t,  $J = 5.7$  Hz, 1H), 3.36 (dd,  $J = 17.2, 5.7$  Hz, 1H), 3.07 (dd,  $J = 17.2, 5.8$  Hz, 1H).  $^{13}\text{C NMR}$  (100 MHz, DMSO- $d_6$ )  $\delta$  188.18, 169.69, 152.67, 139.40,

131.19, 122.88, 121.15, 75.72. HRMS (ESI):  $m/z$  for  $C_{10}H_7NO_6$   $[M-H]^-$  calcd 236.0273, found 236.0191. HPLC condition: Chiralcel OD-H column (25 cm  $\times$  0.46 cm ID), hexane/2-propanol=90:10, flow rate=1.0 mL/min, 254 nm UV detector,  $t_R$ =38.69 min for major isomer, and  $t_R$ =49.17 min for minor isomer.

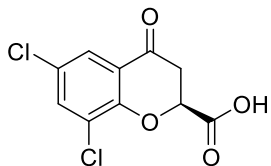

**(S)-6,8-dichloro-4-oxochromane-2-carboxylic acid (2q):** Light brown solid, 90% yield, 98% *ee*. Mp:174-175°C.  $[\alpha]_D^{20} = +17.6$  ( $c=0.11$  in MeOH).  $^1H$  NMR (400 MHz, DMSO- $d_6$ )  $\delta$  13.70 (s, 1H), 7.96 (d,  $J = 1.9$  Hz, 1H), 7.65 (d,  $J = 1.9$  Hz, 1H), 5.54 (t,  $J = 5.7$  Hz, 1H), 3.26 (dd,  $J = 17.2, 5.4$  Hz, 1H), 3.04 (dd,  $J = 17.1, 6.3$  Hz, 1H).  $^{13}C$  NMR (100 MHz, DMSO- $d_6$ )  $\delta$  188.25, 169.78, 154.56, 135.23, 125.50, 124.13, 123.23, 122.61, 75.28. HRMS (ESI):  $m/z$  for  $C_{10}H_6Cl_2O_4$   $[M-H]^-$  calcd 258.9643, found 258.9572. HPLC condition: Chiralcel OD-H column (25 cm  $\times$  0.46 cm ID), hexane/2-propanol=92:8, flow rate=0.8 mL/min, 254 nm UV detector,  $t_R$ =14.83 min for major isomer, and  $t_R$ =17.08 min for minor isomer.

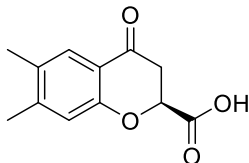

**(S)-6,7-dimethyl-4-oxochromane-2-carboxylic acid (2r):** White solid, 92% yield, 99% *ee*. Mp:181-182°C.  $[\alpha]_D^{20} = +31.8$  ( $c=0.11$  in MeOH).  $^1H$  NMR (400 MHz, DMSO- $d_6$ )  $\delta$  13.34 (s, 1H), 7.46 (s, 1H), 6.91 (s, 1H), 5.23 (t,  $J = 6.1$  Hz, 1H), 3.03 (dd,  $J = 17.0, 5.2$  Hz, 1H), 2.89 (dd,  $J = 17.0, 7.2$  Hz, 1H), 2.25 (s, 3H), 2.18 (s, 3H).  $^{13}C$  NMR (100 MHz, DMSO- $d_6$ )  $\delta$  189.45, 170.57, 158.31, 146.51, 129.90, 125.92, 118.34, 74.45, 19.91, 18.31. HRMS (ESI):  $m/z$  for  $C_{12}H_{12}O_4$   $[M+H]^+$  calcd 221.0736, found 221.0802. HPLC condition: Chiralcel OD-H column (25 cm  $\times$  0.46 cm ID), hexane/2-propanol=90:10, flow rate=1.0 mL/min, 254 nm UV detector,  $t_R$ =11.74 min for major isomer, and  $t_R$ =14.56 min for minor isomer.

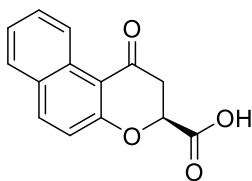

**(S)-1-oxo-2,3-dihydro-1H-benzo[f]chromene-3-carboxylic acid (2s):** Light yellow solid, 94% yield, 98% *ee*. Mp:158-159°C.  $[\alpha]_D^{20} = +106.2$  ( $c=0.13$  in MeOH).  $^1H$  NMR (400 MHz, DMSO- $d_6$ )  $\delta$  13.48 (s, 1H), 9.32 (d,  $J = 8.6$  Hz, 1H), 8.17 (d,  $J = 9.0$  Hz, 1H), 7.93 (d,  $J = 7.9$  Hz, 1H), 7.66 (t,  $J = 7.5$  Hz, 1H), 7.48 (t,  $J = 7.4$  Hz, 1H), 7.29 (d,  $J = 9.0$  Hz, 1H), 5.44 (dd,  $J = 7.3, 5.7$  Hz, 1H), 3.22 (dd,  $J = 16.7, 5.5$  Hz, 1H), 3.06 (dd,  $J = 16.7, 7.6$  Hz, 1H).  $^{13}C$  NMR (100 MHz, DMSO- $d_6$ )  $\delta$  191.11, 170.30, 162.24, 137.77, 130.62, 129.57, 128.76, 124.87, 118.88, 111.92, 74.53. HRMS (ESI):  $m/z$  for  $C_{14}H_{10}O_4$   $[M+H]^+$  calcd 243.0579, found 243.0650. HPLC condition: Chiralcel AS-H column (25 cm  $\times$  0.46 cm ID), hexane/2-

propanol=90:10, flow rate=1.0 mL/min, 254 nm UV detector,  $t_R$ =16.22 min for major isomer, and  $t_R$ =20.78 min for minor isomer.

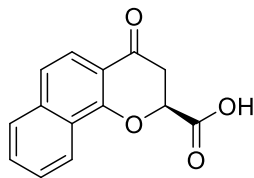

**(S)-4-oxo-3,4-dihydro-2H-benzo[h]chromene-2-carboxylic acid (2t):** Light yellow solid, 95% yield, 99% *ee*. Mp: 189-190°C.  $[\alpha]_D^{20} = +104.5$  ( $c=0.13$  in MeOH).  $^1\text{H NMR}$  (400 MHz, DMSO- $d_6$ )  $\delta$  13.56 (s, 1H), 8.31 (d,  $J = 8.2$  Hz, 1H), 7.95 (d,  $J = 8.0$  Hz, 1H), 7.73 (t,  $J = 7.5$  Hz, 2H), 7.65 (t,  $J = 7.5$  Hz, 1H), 7.55 (d,  $J = 8.7$  Hz, 1H), 5.61 (t,  $J = 6.2$  Hz, 1H), 3.25 (dd,  $J = 17.0, 5.5$  Hz, 1H), 3.08 (dd,  $J = 17.0, 7.0$  Hz, 1H).  $^{13}\text{C NMR}$  (100 MHz, DMSO- $d_6$ )  $\delta$  189.39, 170.40, 158.08, 136.93, 129.90, 127.91, 126.71, 124.16, 123.11, 121.00, 115.21, 75.34. HRMS (ESI):  $m/z$  for  $\text{C}_{14}\text{H}_{10}\text{O}_4$   $[\text{M}+\text{H}]^+$  calcd 243.0579, found 243.0651. HPLC condition: Chiralcel OD-H column (25 cm  $\times$  0.46 cm ID), hexane/2-propanol=90:10, flow rate=1.0 mL/min, 254 nm UV detector,  $t_R$ =15.08 min for major isomer, and  $t_R$ =19.60 min for minor isomer.

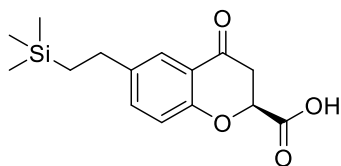

**(S)-4-oxo-6-(2-(trimethylsilyl)ethyl)chromane-2-carboxylic acid (2u):** White solid, 96% yield, 92% *ee*. Mp: 96-97°C.  $[\alpha]_D^{20} = +59.9$  ( $c=0.10$  in MeOH).  $^1\text{H NMR}$  (400 MHz,  $\text{CDCl}_3$ )  $\delta$  7.70 (d,  $J = 2.0$  Hz, 1H), 7.37 (dd,  $J = 8.5, 2.2$  Hz, 1H), 7.00 (d,  $J = 8.5$  Hz, 1H), 5.10 (dd,  $J = 9.4, 5.1$  Hz, 1H), 3.14-3.01 (m, 2H), 2.60-2.56 (m, 2H), 0.85-0.81 (m, 2H), -0.02 (s, 9H).  $^{13}\text{C NMR}$  (100 MHz,  $\text{CDCl}_3$ )  $\delta$  191.72, 175.02, 159.90, 141.34, 138.50, 127.17, 122.25, 119.67, 76.47, 41.13, 30.90, 20.33, 0.00. HRMS (ESI):  $m/z$  for  $\text{C}_{15}\text{H}_{20}\text{O}_4\text{Si}$   $[\text{M}+\text{H}]^+$  calcd 293.1131, found 293.1165. HPLC condition: Double Chiralcel AD-H column (25 cm  $\times$  0.46 cm ID), hexane/2-propanol=98:1, flow rate=1.0 mL/min, 254 nm UV detector,  $t_R$ =18.25 min for major isomer, and  $t_R$ =20.27 min for minor isomer.

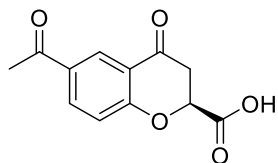

**(S)-6-acetyl-4-oxochromane-2-carboxylic acid (2v):** White solid, 88% yield, 98% *ee*. Mp: 204-205°C.  $[\alpha]_D^{20} = +56.9$  ( $c=0.10$  in MeOH).  $^1\text{H NMR}$  (400 MHz, DMSO- $d_6$ )  $\delta$  8.29 (d,  $J = 1.8$  Hz, 1H), 8.14 (dd,  $J = 8.7, 2.0$  Hz, 1H), 7.24 (d,  $J = 8.7$  Hz, 1H), 5.46 (t,  $J = 6.1$  Hz, 1H), 3.22 (dd,  $J = 17.0, 5.5$  Hz, 1H), 3.03 (dd,  $J = 17.1, 6.9$  Hz, 1H), 2.57 (s, 3H).  $^{13}\text{C NMR}$  (100 MHz, DMSO- $d_6$ )  $\delta$  196.06, 189.39, 170.08, 163.20, 135.50, 130.49, 126.95, 120.13, 118.49, 74.88, 26.49. HRMS (ESI):  $m/z$  for  $\text{C}_{12}\text{H}_{10}\text{O}_5$   $[\text{M}+\text{H}]^+$  calcd

235.0528, found 235.0594. HPLC condition: Double Chiralcel AD-H column (25 cm × 0.46 cm ID), hexane/2-propanol=97:3, flow rate=0.8 mL/min, 254 nm UV detector,  $t_R$ =53.96 min for major isomer, and  $t_R$ =58.48 min for minor isomer.

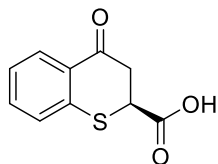

**(S)-4-oxothiochromane-2-carboxylic acid (2w):** Light brown solid, 75% yield, 90% *ee*. Mp:157-158°C.  $[\alpha]_D^{20} = +369.5$  ( $c=0.13$  in MeOH).  $^1\text{H NMR}$  (400 MHz, DMSO- $d_6$ )  $\delta$  13.17 (s, 1H), 7.95 (d,  $J = 7.7$  Hz, 1H), 7.49 (t,  $J = 7.1$  Hz, 1H), 7.35 (d,  $J = 7.8$  Hz, 1H), 7.25 (t,  $J = 7.4$  Hz, 1H), 4.46-4.35 (m, 1H), 3.09 (qd,  $J = 16.9, 5.2$  Hz, 2H).  $^{13}\text{C NMR}$  (100 MHz, DMSO- $d_6$ )  $\delta$  192.07, 171.58, 138.50, 133.72, 130.03, 127.87, 127.31, 125.42, 41.24, 40.79. HRMS (ESI):  $m/z$  for  $\text{C}_{10}\text{H}_8\text{O}_3\text{S}$   $[\text{M}+\text{H}]^+$  calcd 209.0194, found 209.0263. HPLC condition: Chiralcel OD-H column (25 cm × 0.46 cm ID), hexane/2-propanol=90:10, flow rate=1.0 mL/min, 254 nm UV detector,  $t_R$ =14.34 min for minor isomer, and  $t_R$ =16.27 min for major isomer.

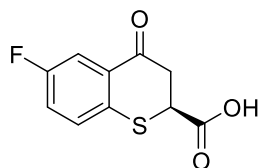

**(S)-7-fluoro-4-oxothiochromane-2-carboxylic acid (2x):** White solid, 82% yield, 94% *ee*. Mp:175-177°C.  $[\alpha]_D^{20} = +344.2$  ( $c=0.10$  in MeOH).  $^1\text{H NMR}$  (400 MHz, DMSO- $d_6$ )  $\delta$  13.22 (s, 1H), 7.76-7.60 (m, 1H), 7.52-7.31 (m, 2H), 4.41 (t,  $J = 5.1$  Hz, 1H), 3.22-2.97 (m, 2H).  $^{13}\text{C NMR}$  (100 MHz, DMSO- $d_6$ )  $\delta$  191.36, 171.51, 161.19, 158.77, 134.05, 131.55, 129.72, 121.51, 121.28, 113.73, 113.50, 41.18, 40.46.  $^{19}\text{F NMR}$  (100 MHz, DMSO- $d_6$ )  $\delta$  -116.24. HRMS (ESI):  $m/z$  for  $\text{C}_{10}\text{H}_7\text{FO}_3\text{S}$   $[\text{M}+\text{H}]^+$  calcd 227.0100, found 227.0180. HPLC condition: Chiralcel OD-H column (25 cm × 0.46 cm ID), hexane/2-propanol=90:10, flow rate=1.0 mL/min, 254 nm UV detector,  $t_R$ =13.40 min for minor isomer, and  $t_R$ =16.39 min for major isomer.

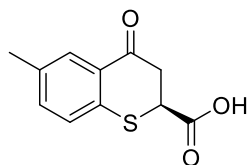

**(S)-7-methyl-4-oxothiochromane-2-carboxylic acid (2y):** White solid, 68% yield, 90% *ee*. Mp:184-186°C.  $[\alpha]_D^{20} = +10.8$  ( $c=0.49$  in  $\text{CH}_2\text{Cl}_2$ ).  $^1\text{H NMR}$  (400 MHz, DMSO- $d_6$ )  $\delta$  13.13 (s, 1H), 7.77 (s, 1H), 7.33 (d,  $J = 6.7$  Hz, 1H), 7.24 (d,  $J = 8.0$  Hz, 1H), 4.36 (dd,  $J = 5.9, 4.5$  Hz, 1H), 3.06 (qd,  $J = 16.9, 5.2$  Hz, 2H), 2.29 (s, 3H).  $^{13}\text{C NMR}$  (100 MHz, DMSO- $d_6$ )  $\delta$  192.20, 171.60, 135.06, 134.87, 134.58, 129.87, 128.00, 127.27, 41.25, 40.97, 20.30. HRMS (ESI):  $m/z$  for  $\text{C}_{11}\text{H}_{10}\text{O}_3\text{S}$   $[\text{M}-\text{H}]^-$  calcd 221.0351, found 221.0288. HPLC condition: Chiralcel OD-H column (25 cm × 0.46 cm ID), hexane/2-propanol=90:10,

flow rate=1.0 mL/min, 254 nm UV detector,  $t_R$ =12.33 min for minor isomer, and  $t_R$ =14.17 min for major isomer.

## 5. Scale-up Synthesis and Transformations

### 5.1 Scale-up synthesis of 2a

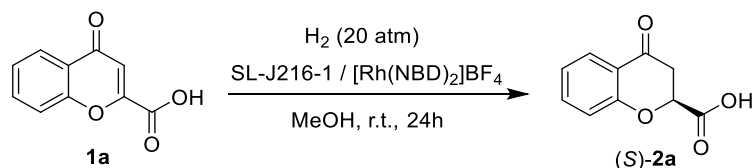

SL-J216-1 (0.70 mg, 0.0011 mmol) and Rh(NBD)<sub>2</sub>BF<sub>4</sub> (0.37 mg, 0.001 mmol) were dissolved in anhydrous MeOH (20 mL) under nitrogen. The mixture was stirred for 30 min at room temperature. The substrate **1a** (1.90g, 10 mmol) was placed in a 50 mL flame-dried round bottom flask equipped with a magnetic stirrer bar. This flask was put into an autoclave. The pre-prepared solution of catalyst was added under a nitrogen atmosphere. After purging with hydrogen for three times, the hydrogen pressure was finally pressurized to 20 bar. The reaction mixture was concentrated and purified via a silica gel column chromatography (PE/EtOAc/HCOOH=5/1/0.05) to provide (*S*)-4-oxochromane-2-carboxylic acid **2a** (1.82g, 95% yield, 97% *ee*).

### 5.2 Synthesis of (*S*)-chromane-2-carboxylic acid (**5**)

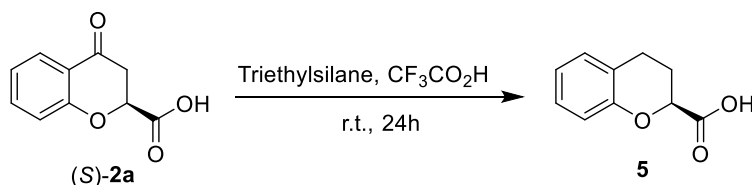

(*S*)-**2a** (500 mg, 2.60 mmol) was dissolved in 10 mL of trifluoroacetic acid. Triethyl silane (2 mL) was added slowly and the solution was stirred at room temperature. When the reaction was completed, the trifluoroacetic acid and excessive triethyl silane were removed under vacuum. To the residue, 10 mL of water and 20 mL of diethyl ether were added, the organic layer was separated and the aqueous layer was extracted with diethyl ether (2×10 mL). The combined organic layers were washed with a saturated aqueous solution of NaCl, dried over anhydrous Na<sub>2</sub>SO<sub>4</sub> and concentrated in vacuo, The residue was purified via silica gel column chromatography (PE/EtOAc/HCOOH=5/1/0.05) to provide (*S*)-chromane-2-carboxylic acid **5** as a white solid (430 mg, 93% yield, 96% *ee*). Mp: 76-77 °C.  $[\alpha]_D^{20} = -13.6$  (*c* 0.14, CH<sub>2</sub>Cl<sub>2</sub>). <sup>1</sup>H NMR (400 MHz, CDCl<sub>3</sub>)  $\delta$  7.16-7.12 (m, 1H), 7.06 (d, *J* = 7.3 Hz, 1H), 6.94-6.89 (m, 2H), 4.76 (dd, *J* = 8.3, 3.5 Hz, 1H), 2.94-2.78 (m, 2H), 2.40-2.34 (m, 1H), 2.24-2.15 (m, 1H). <sup>13</sup>C NMR (100 MHz, CDCl<sub>3</sub>)  $\delta$  174.44, 152.79, 129.58, 127.76, 121.32, 116.85, 73.37, 24.52, 23.48. HRMS (ESI): *m/z* for C<sub>10</sub>H<sub>10</sub>O<sub>3</sub> [M-H]<sup>-</sup> calcd 177.0630, found 177.0560. HPLC condition: Chiralcel AS-H column (25 cm × 0.46 cm ID), hexane/2-propanol=95:5, flow rate=0.8 mL/min, 254 nm UV detector,  $t_R$ =9.27 min for major isomer, and  $t_R$ =10.36 min for minor isomer.

### 5.3 Synthesis of (*S*)-2-(hydroxymethyl)chroman-4-one (**6**)

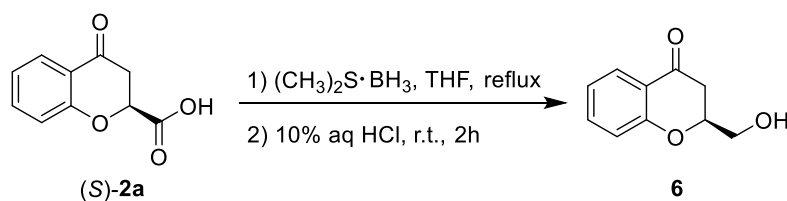

To a stirred solution of (*S*)-**2a** (384 mg, 2.0 mmol) in THF (10 mL) at 0 °C, borane-methyl sulfide complex (2.0 M in THF, 1.6 mL, 3.2 mmol) was added dropwise for about 15 minutes. The solution was warmed to room temperature and then heated at reflux for 4 hours. The solution was cooled to room temperature and 10% aqueous HCl (10 mL) was added over 15 minutes and the solution was stirred at room temperature for 2 hours. The solution was then poured into EtOAc (30 mL) and washed successively with water, saturated NaHCO<sub>3</sub> and saturated NH<sub>4</sub>Cl. The organic layer was separated and dried over anhydrous Na<sub>2</sub>SO<sub>4</sub>, and then concentrated and purified via silica gel column chromatography (PE/EtOAc=10/1) to provide (*S*)-2-(hydroxymethyl)chroman-4-one **6** as a light yellow viscous oil (310 mg, 87% yield, 96% *ee*).  $[\alpha]_{\text{D}}^{20} = +43.8$  (*c* 0.60, CH<sub>2</sub>Cl<sub>2</sub>). <sup>1</sup>H NMR (400 MHz, CDCl<sub>3</sub>)  $\delta$  7.90 (dd, *J* = 7.8, 1.5 Hz, 1H), 7.52-7.47 (m, 1H), 7.06-7.00 (m, 2H), 4.59 (ddt, *J* = 13.4, 5.6, 2.9 Hz, 1H), 4.00 (dd, *J* = 12.2, 3.0 Hz, 1H), 3.85 (dd, *J* = 12.2, 5.3 Hz, 1H), 2.95 (dd, *J* = 16.9, 13.5 Hz, 1H), 2.64 (dd, *J* = 16.9, 2.8 Hz, 1H). <sup>13</sup>C NMR (100 MHz, CDCl<sub>3</sub>)  $\delta$  191.91, 161.09, 136.16, 127.07, 121.68, 120.90, 117.85, 78.19, 64.56, 39.0. HRMS (ESI): *m/z* for C<sub>10</sub>H<sub>10</sub>O<sub>3</sub> [M+H]<sup>+</sup> calcd 179.0630, found 179.0700. HPLC condition: Chiralcel OD-H column (25 cm × 0.46 cm ID), hexane/2-propanol=90:10, flow rate=1.0 mL/min, 254 nm UV detector, *t<sub>R</sub>*=14.29 min for major isomer, and *t<sub>R</sub>*=16.44 min for minor isomer.

### 5.4 Synthesis of (2*S*,5*S*)-5H-2,5-methanobenzo[*e*][1,4]dioxepin-3(2H)-one (**8**)

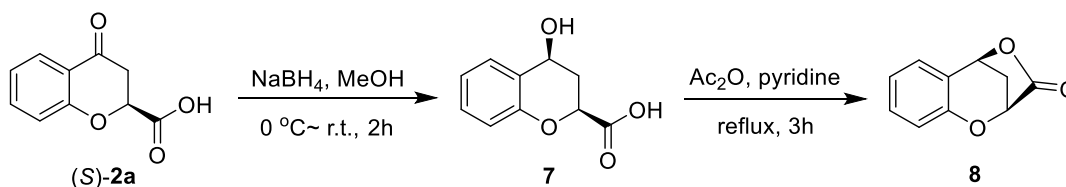

#### Step 1: Synthesis of (2*S*,4*S*)-4-hydroxychromane-2-carboxylic acid (**7**)

To a suspension of (*S*)-**2a** (500 mg, 2.60 mmol) in MeOH (10 mL) at 0 °C was added NaBH<sub>4</sub> (196.7 mg, 5.3 mmol) in portions and the mixture was stirred at room temperature for 2 hours. After the reaction was completed, the methanol was removed in vacuo and the residue was dissolved in EtOAc (20 mL). The resulting mixture was washed with water (50 mL × 2) and a saturated aqueous solution of NaCl (50 mL), dried over anhydrous Na<sub>2</sub>SO<sub>4</sub> and concentrated in vacuo. The residue was purified by column chromatography, eluted with PE/EtOAc (100/1 to 10/1) to afford (2*S*,4*S*)-4-hydroxychromane-2-carboxylic acid **7** as a white solid. (430 mg, 93% yield, 29:1 *dr*, >99% *ee*). Mp: 128-129 °C.  $[\alpha]_{\text{D}}^{20} = +119.3$  (*c* 0.13, MeOH). <sup>1</sup>H NMR (400 MHz, DMSO-*d*<sub>6</sub>)  $\delta$  12.91 (s, 1H), 7.34 (d, *J* = 7.3 Hz, 1H), 7.15 (dd, *J* = 11.2, 4.1 Hz, 1H), 6.90 (t, *J* = 7.3 Hz, 1H), 6.80 (d, *J* = 8.1 Hz, 1H), 5.44 (s, 1H), 4.82-4.75 (m,

2H), 2.35-2.30 (m, 1H), 2.04-1.96 (m, 1H).  $^{13}\text{C}$  NMR (100 MHz, DMSO- $d_6$ )  $\delta$  171.48, 152.85, 128.32, 126.28, 120.25, 115.85, 71.65, 62.15, 33.44. HRMS (ESI):  $m/z$  for  $\text{C}_{10}\text{H}_{10}\text{O}_4$   $[\text{M}-\text{H}]^-$  calcd 193.0579, found 193.0506. HPLC condition: Chiralcel OD-H column (25 cm  $\times$  0.46 cm ID), hexane/2-propanol=90:10, flow rate=1.0 mL/min, 254 nm UV detector,  $t_{\text{R}}$ =18.53 min for major isomer, and  $t_{\text{R}}$ =23.74 min for minor isomer. The absolute configuration of compound **6** was assigned according to the X-ray crystal structure.

## Step 2: Synthesis of (2*S*,5*S*)-5H-2,5-methanobenzo[e][1,4]dioxepin-3(2H)-one (**8**)

Mix the (2*S*,4*S*)-4-hydroxychromane-2-carboxylic acid **7** (300 mg, 1.5 mmol) with 5 mL of  $\text{Ac}_2\text{O}$  in 10 mL of pyridine. The solution was heated at 80°C for 3 hours. The reaction was concentrated under vacuum and the residue was dissolved in EtOAc (20 mL). The resulting mixture was washed with water (15 mL  $\times$  3), dried over anhydrous  $\text{Na}_2\text{SO}_4$  and concentrated in vacuo. The residue was purified by column chromatography (PE/EtOAc=10/1) to give (2*S*,5*S*)-5H-2,5-methanobenzo[e][1,4]dioxepin-3(2H)-one **8** as a white solid. (430 mg, 90% yield, >99:1 dr, 99% *ee*). Mp: 78-79 °C.  $[\alpha]_{\text{D}}^{20} = +92.7$  (*c* 0.15,  $\text{CH}_2\text{Cl}_2$ ).  $^1\text{H}$  NMR (400 MHz,  $\text{CDCl}_3$ )  $\delta$  7.31 (td,  $J = 8.2, 1.5$  Hz, 1H), 7.16 (dd,  $J = 7.4, 1.1$  Hz, 1H), 6.92 (dd,  $J = 14.3, 7.8$  Hz, 2H), 5.36 (d,  $J = 5.0$  Hz, 1H), 4.87 (d,  $J = 3.1$  Hz, 1H), 2.56 (ddd,  $J = 12.8, 5.0, 3.4$  Hz, 1H), 2.44 (d,  $J = 12.8$  Hz, 1H).  $^{13}\text{C}$  NMR (100 MHz,  $\text{CDCl}_3$ )  $\delta$  171.34, 152.55, 131.64, 127.36, 123.01, 121.19, 116.78, 76.10, 72.90, 31.84. HRMS (ESI):  $m/z$  for  $\text{C}_{10}\text{H}_8\text{O}_3$   $[\text{M}+\text{H}]^+$  calcd 177.0473, found 177.0550. HPLC condition: Chiralcel OD-H column (25 cm  $\times$  0.46 cm ID), hexane/2-propanol=90:10, flow rate=1.0 mL/min, 254 nm UV detector,  $t_{\text{R}}$ =16.14 min for major isomer, and  $t_{\text{R}}$ =18.49 min for minor isomer.

## 6. X-ray analysis

X-Ray Crystallography Data for **2m** (CCDC 2089780): A colorless crystal suitable for X-ray crystallography was obtained from *n*-hexane/DCM/THF solution at room temperature under air atmosphere.

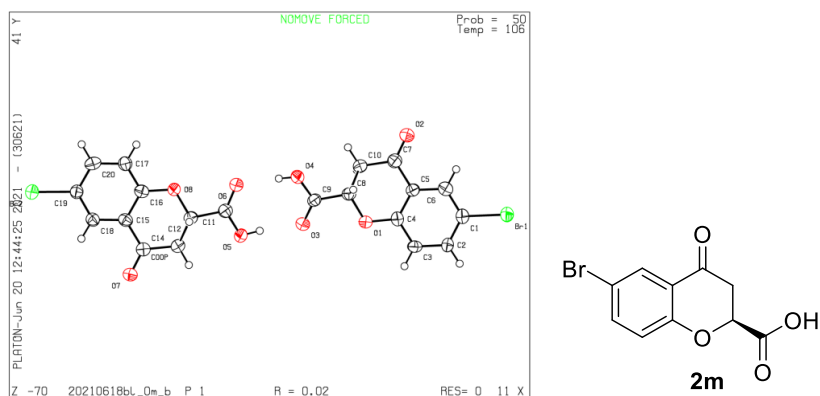

The ORTEP drawing (50% probability for thermal ellipsoids) of **2m**

## checkCIF/PLATON report

You have not supplied any structure factors. As a result the full set of tests cannot be run.

THIS REPORT IS FOR GUIDANCE ONLY. IF USED AS PART OF A REVIEW PROCEDURE FOR PUBLICATION, IT SHOULD NOT REPLACE THE EXPERTISE OF AN EXPERIENCED CRYSTALLOGRAPHIC REFEREE.

No syntax errors found. [CIF dictionary](#) [Interpreting this report](#)

### Datablock: 20210618bl\_0m\_b

---

|                 |                 |                    |                 |
|-----------------|-----------------|--------------------|-----------------|
| Bond precision: | C-C = 0.0070 Å  | Wavelength=1.34139 |                 |
| Cell:           | a=5.0850(3)     | b=10.2391(6)       | c=10.6291(6)    |
|                 | alpha=61.505(1) | beta=86.820(1)     | gamma=79.073(1) |
| Temperature:    | 106 K           |                    |                 |
|                 | Calculated      | Reported           |                 |
| Volume          | 477.16(5)       | 477.16(5)          |                 |
| Space group     | P 1             | P 1                |                 |
| Hall group      | P 1             | P 1                |                 |
| Moiety formula  | C10 H7 Br O4    | 2(C10 H7 Br O4)    |                 |
| Sum formula     | C10 H7 Br O4    | C20 H14 Br2 O8     |                 |
| Mr              | 271.06          | 542.13             |                 |
| Dx, g cm-3      | 1.887           | 1.887              |                 |
| Z               | 2               | 1                  |                 |
| Mu (mm-1)       | 3.851           | 4.003              |                 |
| F000            | 268.0           | 268.0              |                 |
| F000'           | 266.69          |                    |                 |
| h, k, lmax      | 6, 12, 12       | 6, 12, 12          |                 |
| Nref            | 3624[ 1812]     | 3534               |                 |
| Tmin, Tmax      | 0.487, 0.619    | 0.024, 0.091       |                 |
| Tmin'           | 0.428           |                    |                 |

Correction method= # Reported T Limits: Tmin=0.024 Tmax=0.091  
AbsCorr = MULTI-SCAN

Data completeness= 1.95/0.98      Theta(max)= 54.994

R(reflections)= 0.0224( 3525)      wR2(reflections)= 0.0572( 3534)

S = 1.056      Npar= 273

---

The following ALERTS were generated. Each ALERT has the format  
test-name\_ALERT\_alert-type\_alert-level.  
Click on the hyperlinks for more details of the test.

X-Ray Crystallography Data for **7** (CCDC 2122207): A colorless crystal suitable for X-ray crystallography was obtained from *n*-hexane/DCM/THF solution at room temperature under air atmosphere.

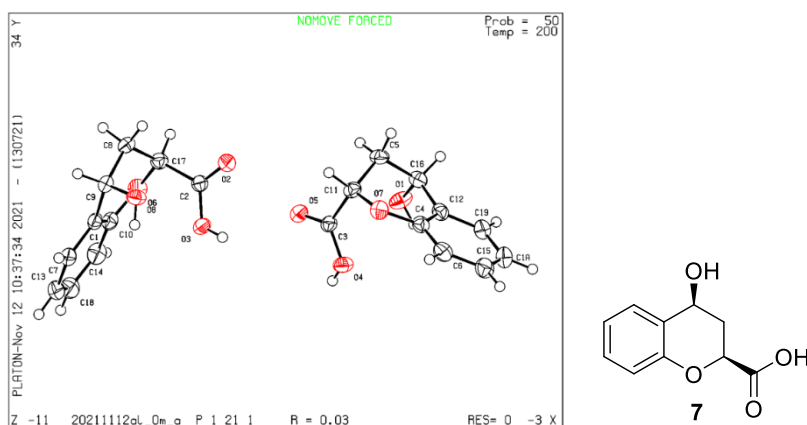

The ORTEP drawing (50% probability for thermal ellipsoids) of **7**





Martin, K. Morokuma, O. Farkas, J. B. Foresman, and D. J. Fox, Gaussian, Inc., Gaussian 16, Revision A.03; Wallingford CT, 2016.

## 7.2 Computational Methods

All density functional theory (DFT) calculations were conducted using the GAUSSIAN 16 series of programs. Density functional B3-LYP<sup>4</sup> with a standard 6-31G(d) basis set (LanL08<sup>5</sup> basis set for Rh and Fe) was used for geometry optimizations. Harmonic frequency calculations were performed for all stationary points to confirm them as local minima or transition structures, and to derive thermochemical corrections for the enthalpies and free energies. All minima had zero imaginary frequency and all transition states had only one imaginary frequency. The DFT method M06 functional<sup>6</sup> with larger basis set 6-311+G(d) (LanL08 basis set for Rh and Fe) was used to calculate single point energies with methanol as solvent with a continuum solvation model (SMD<sup>7</sup>). The energies reported in this study are M06-calculated Gibbs free energies in methanol solvent. In order to evaluate accurately the entropy of the multi-component system, the solution-translational entropy correction has been recalculated with THERMO program.<sup>8</sup> The optimized structures were displayed using CYLview.<sup>9</sup>

## 7.3 Calculated Gibbs energy profiles

The calculated Gibbs energy profiles for the enantioselective hydrogenation using JosiPhos SL-J216-1 as ligand were given in Figure S1, where the active catalyst Rh(I) species **CP1** was set as the relative zero point. As shown in Figure S1, the oxidation of H<sub>2</sub> onto the Rh(I) center in **CP1** occurred via transition state **TS1** to give Rh(III) hydride species **CP2**. The free energy barrier of **TS1** is only 6.2 kcal/mol. The coordination of the carboxylic acid anion, which is generated by ionization of chromone-2-carboxylic acid in MeOH, to the Rh(III) center in **CP2** generate the carboxyl-Rh(III) intermediate **CP3** with 3.5 kcal/mol exergonic. The subsequent protonation of carbonyl in intermediate **CP3** by the protonated methanol gives aromatic oxonium ion intermediate **CP4**. The following 1,4-migration of hydride from Rh(III) center to carbonyl cation with a *Re*-face occurs via transition state **TS2** with a free energy barrier of 5.2 kcal/mol to give the cationic Rh(III) intermediate **CP5**. In **TS2**, the MeOH has a secondary interaction with JosiPhos SL-J216-1, that is, a hydrogen-bonding interaction of MeOH with naphthalene unit. The O-H reductive elimination occurs via transition state **TS3** with an overall activation free energy of 24.1 kcal/mol, where the active catalyst Rh(I) **CP1** and enol intermediate **CP6** was generated. The isomerization of enol intermediate **CP6** would give the **2a** product with *S* configuration. As seen in Figure S1, the calculated results show that the 1,4-migration of hydride from Rh(III) center to carbonyl cation with a *Si*-face in **CP4'** occurs via transition state **TS2'** with a free energy barrier of 8.4 kcal/mol to give the cationic Rh(III) intermediate **CP5'**. The free energy of **TS2'** is 1.6 kcal/mol higher than that of **TS2**. The following O-H bond reductive elimination generates the enol intermediate **CP6'** with *R* configuration via transition state **TS3'**. The hydrogen-bonding interaction of MeOH with naphthalene unit leads to the relative free energy of **TS2** is 1.6 kcal/mol lower than that of **TS2'**. The free energy of **TS3'** is also 1.3

kcal/mol higher than that of **TS3**. The calculated results indicated that the generation of enantiomer (*R*)-**2a** is demonstrated to be kinetically unfavorable, which is consistent with the experiment observation.

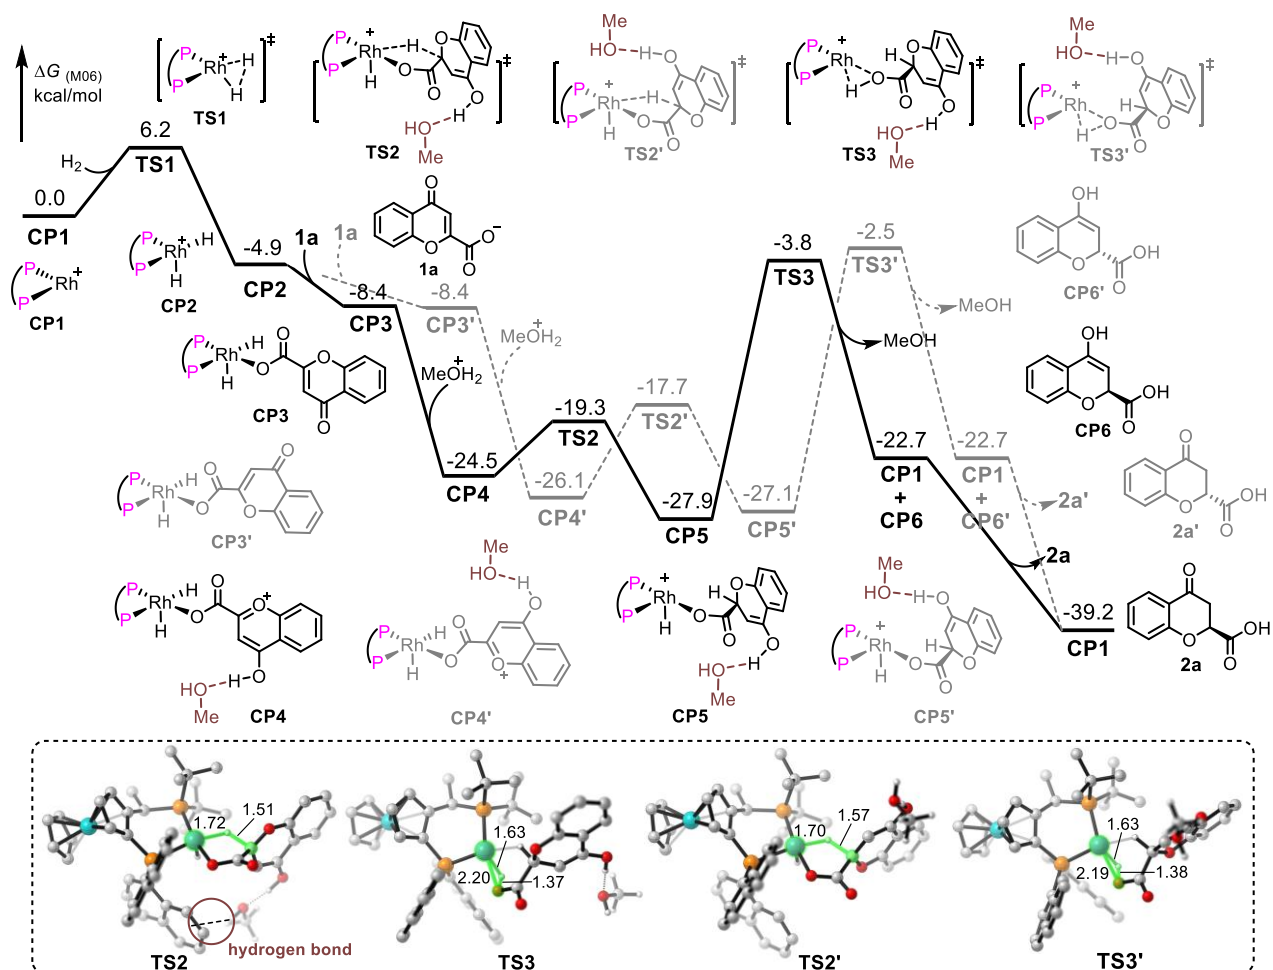

**Figure S1** Calculated Gibbs energy profiles for the highly chemo- and enantioselective hydrogenation of chromone-2-carboxylic acids.

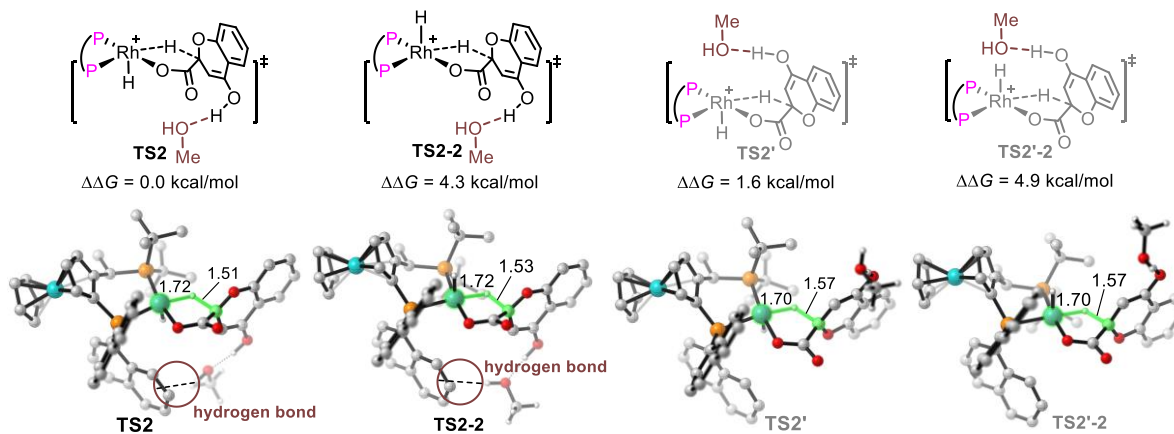

**Figure S2** Transition states **TS2** and **TS2'** with different configurations.

We also calculated the transition states for the axial H migrates to carbonyl cation in **CP4** and **CP4'**. The calculated results were shown in Figure S2. The free energy of **TS2-2** is 4.3 kcal/mol higher than that of **TS2**. The free energy of **TS2'-2** is 3.3 kcal/mol higher than that of **TS2'**. Thus, the calculated results indicated that the axial H migrates to carbonyl cation in **CP4** and **CP4'** are unfavorable.

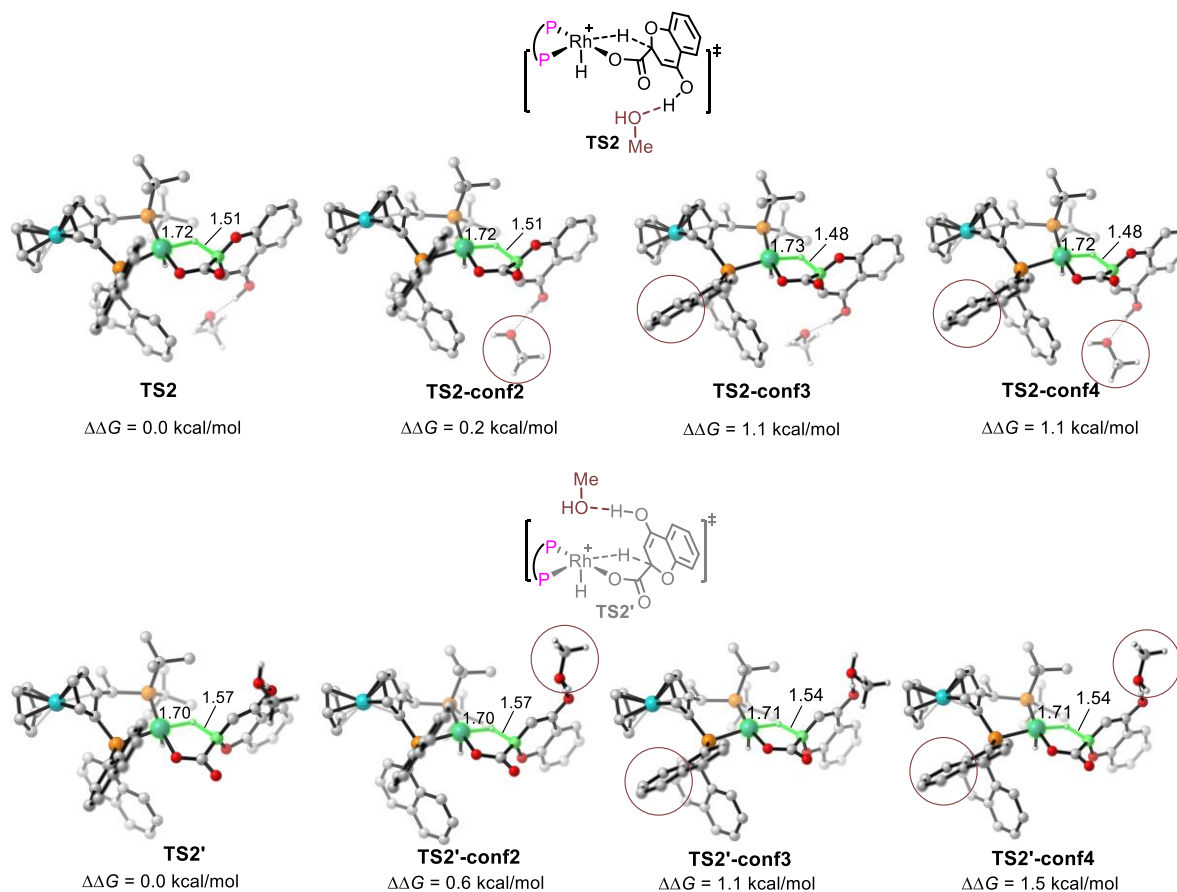

**Figure S3** Conformational search on key transition states **TS2** and **TS2'**.

We performed the conformation search for **TS2** and **TS2'**. We've got four conformations for both transition states. The orientation of the methyl groups in methanol and the naphthalene ring is different in these different conformations.

#### 7.4 B3-LYP and M06 absolute calculation energies, enthalpies, and free energies

| Geometry       | $E_{(\text{elec-B3-LYP})}^a$ | $H_{(\text{corr-B3-LYP})}^b$ | $G_{(\text{corr-B3-LYP})}^c$ | $E_{(\text{solv-M06})}^d$ | IF <sup>e</sup> |
|----------------|------------------------------|------------------------------|------------------------------|---------------------------|-----------------|
| <b>CP1</b>     | -2466.280242                 | 0.777517                     | 0.678802                     | -2465.491497              | -               |
| H <sub>2</sub> | -1.175482                    | 0.01345                      | 0.010522                     | -1.168172793              | -               |
| <b>TS1</b>     | -2467.451743                 | 0.792905                     | 0.691803                     | -2466.652235              | -832.3          |
| <b>CP2</b>     | -2467.462809                 | 0.795427                     | 0.694219                     | -2466.672425              | -               |
| <b>1a</b>      | -685.0172818                 | 0.140521                     | 0.103822                     | -684.903934               | -               |

|                                 |              |          |          |              |         |
|---------------------------------|--------------|----------|----------|--------------|---------|
| <b>CP3</b>                      | -3152.658178 | 0.940215 | 0.817248 | -3151.601044 | -       |
| MeO <sup>+</sup> H <sub>2</sub> | -116.013629  | 0.068852 | 0.052479 | -116.100148  | -       |
| <b>CP4</b>                      | -3268.792851 | 1.010699 | 0.877251 | -3267.734375 | -       |
| <b>TS2</b>                      | -3268.766668 | 1.007730 | 0.853069 | -3267.724611 | -647.7  |
| <b>CP5</b>                      | -3268.770904 | 1.011180 | 0.877354 | -3267.739918 | -       |
| <b>TS3</b>                      | -3268.730199 | 1.009103 | 0.874899 | -3267.699017 | -1214.7 |
| MeOH                            | -115.712205  | 0.055710 | 0.040105 | -115.687418  | -       |
| <b>CP6</b>                      | -686.742125  | 0.177317 | 0.139085 | -686.533316  | -       |
| <b>2a</b>                       | -686.770004  | 0.177735 | 0.139094 | -686.559631  | -       |
| <b>CP3'</b>                     | -3152.658448 | 0.940212 | 0.817098 | -3151.600973 | -       |
| <b>CP4'</b>                     | -3268.793489 | 1.010980 | 0.876659 | -3267.736388 | -       |
| <b>TS2'</b>                     | -3268.766822 | 1.007949 | 0.875092 | -3267.721438 | -621.4  |
| <b>CP5'</b>                     | -3268.770569 | 1.011219 | 0.877889 | -3267.739134 | -       |
| <b>TS3'</b>                     | -3268.730684 | 1.009255 | 0.875464 | -3267.697577 | -1207.6 |
| <b>CP6'</b>                     | -686.742125  | 0.177317 | 0.139085 | -686.533316  | -       |
| <b>2a'</b>                      | -686.770004  | 0.177735 | 0.139094 | -686.559631  | -       |
| <b>TS2-2</b>                    | -3268.760891 | 1.008084 | 0.875841 | -3267.717753 | -653.1  |
| <b>TS2'-2</b>                   | -3268.763427 | 1.008256 | 0.874917 | -3267.716127 | -616.5  |
| <b>TS2-conf2</b>                | -3268.766809 | 1.007824 | 0.875909 | -3267.724398 | -638.3  |
| <b>TS2-conf3</b>                | -3268.765910 | 1.007922 | 0.876070 | -3267.723095 | -610.4  |
| <b>TS2-conf4</b>                | -3268.766157 | 1.007972 | 0.875987 | -3267.723063 | -603.8  |
| <b>TS2'-conf2</b>               | -3268.766656 | 1.008049 | 0.875246 | -3267.720707 | -621.3  |
| <b>TS2'-conf3</b>               | -3268.765074 | 1.008066 | 0.874964 | -3267.719628 | -611.4  |
| <b>TS2'-conf4</b>               | -3268.764885 | 1.008065 | 0.874715 | -3267.718690 | -613.4  |

<sup>a</sup>The electronic energy calculated by B3-LYP in gas phase. <sup>b</sup>The thermal correction to enthalpy calculated by B3-LYP in gas phase. <sup>c</sup>The thermal correction to Gibbs free energy calculated by B3-LYP in gas phase. <sup>d</sup>The electronic energy calculated by M06 in methanol solvent. <sup>e</sup>The B3-LYP calculated imaginary frequencies for the transition states.

## 7.5 B3-LYP geometries for all the optimized compounds and transition states

|            |            |             |             |   |            |             |             |
|------------|------------|-------------|-------------|---|------------|-------------|-------------|
| <b>CP1</b> |            |             |             | C | 1.97357300 | 0.67924600  | -0.92050600 |
| Fe         | 3.25980700 | -0.95353300 | -0.81309500 | C | 3.89601000 | -1.75516400 | 1.01309200  |

|   |             |             |             |                      |             |             |             |
|---|-------------|-------------|-------------|----------------------|-------------|-------------|-------------|
| C | 2.86168700  | 0.65508900  | -2.04189900 | H                    | -1.79716500 | 4.86127500  | -0.64474600 |
| H | 3.60054100  | 1.40808500  | -2.27774700 | H                    | -2.04266800 | 4.44524900  | -2.33864300 |
| C | 1.19440000  | -0.55216400 | -0.96492600 | P                    | -0.39009200 | -0.84245200 | -0.09996200 |
| C | 5.32353900  | -0.90212900 | -0.58591700 | C                    | -1.39953900 | -1.86054200 | -1.28284600 |
| H | 5.97276600  | -0.23124300 | -1.13307300 | C                    | -2.50171500 | -1.35464300 | -2.05855400 |
| C | 1.65816700  | -1.30355100 | -2.10369500 | C                    | -1.03469900 | -3.19417700 | -1.40896500 |
| H | 1.27961000  | -2.26623000 | -2.41504500 | C                    | -3.02569400 | -0.03642500 | -1.95048000 |
| C | 4.02700600  | -2.72747800 | -0.02638800 | C                    | -3.14522700 | -2.24740600 | -2.98802300 |
| H | 3.54580100  | -3.69578800 | -0.06882300 | C                    | -1.67522700 | -4.06114500 | -2.32016000 |
| C | 4.69614200  | -0.62973000 | 0.66707100  | H                    | -0.23835300 | -3.60031600 | -0.79387900 |
| H | 4.80044100  | 0.27662400  | 1.24876000  | C                    | -4.09237200 | 0.38121200  | -2.71699800 |
| C | 2.66868000  | -0.55907200 | -2.76164100 | H                    | -2.58273200 | 0.64466800  | -1.22474300 |
| H | 3.22829400  | -0.87867900 | -3.63062100 | C                    | -4.23486800 | -1.77986800 | -3.77224200 |
| C | 4.91246700  | -2.19937000 | -1.01136200 | C                    | -2.70213400 | -3.58986200 | -3.10295000 |
| H | 5.19261000  | -2.68206700 | -1.93835200 | H                    | -1.35247300 | -5.09537400 | -2.39208200 |
| H | 3.28623100  | -1.84461000 | 1.90108100  | C                    | -4.70134800 | -0.49255400 | -3.64682200 |
| C | 1.86165800  | 1.81086200  | 0.08223900  | H                    | -4.47221400 | 1.39311700  | -2.60380800 |
| H | 1.90714300  | 1.36849900  | 1.08234800  | H                    | -4.70050700 | -2.46948600 | -4.47144900 |
| C | 3.01249600  | 2.82666100  | -0.02771800 | H                    | -3.20215300 | -4.24555700 | -3.81102600 |
| H | 2.91286100  | 3.62870800  | 0.70777900  | H                    | -5.53753000 | -0.14935400 | -4.24859700 |
| H | 3.96393100  | 2.31868100  | 0.16146200  | C                    | -0.25397400 | -1.93842500 | 1.37839600  |
| H | 3.07509800  | 3.28856400  | -1.01410200 | C                    | -1.23856300 | -1.73269800 | 2.40226100  |
| P | 0.10188200  | 2.51738300  | 0.12110600  | C                    | 0.74941700  | -2.86718900 | 1.57059700  |
| C | -0.31034800 | 3.46391000  | -1.49782800 | C                    | -2.34287300 | -0.83391100 | 2.25793500  |
| C | -0.05456500 | 3.63597200  | 1.68305900  | C                    | -1.10511300 | -2.43621400 | 3.64245400  |
| C | 0.29518700  | 5.12633600  | 1.53386900  | C                    | 0.84895300  | -3.59708200 | 2.78029800  |
| H | 0.16090800  | 5.62004400  | 2.50508600  | H                    | 1.48898800  | -3.02273700 | 0.79434600  |
| H | 1.33643600  | 5.27935300  | 1.23430300  | C                    | -3.22803800 | -0.61040000 | 3.29849500  |
| H | -0.34841700 | 5.64318600  | 0.81764200  | H                    | -2.67767900 | -0.51157500 | 1.24320000  |
| C | 0.80425400  | 3.03249300  | 2.81737900  | C                    | -2.02935600 | -2.17592300 | 4.69127000  |
| H | 0.59676900  | 1.96701300  | 2.96666000  | C                    | -0.04592400 | -3.37142300 | 3.79975600  |
| H | 1.87627100  | 3.16108100  | 2.64293200  | H                    | 1.64824800  | -4.32202700 | 2.90320500  |
| H | 0.56502400  | 3.55201000  | 3.75359300  | C                    | -3.05744700 | -1.27192800 | 4.53474400  |
| C | -1.54495800 | 3.49381900  | 2.09147500  | H                    | -4.07784100 | 0.04987700  | 3.15073000  |
| H | -1.72181400 | 4.01099900  | 3.04364000  | H                    | -1.91200100 | -2.71285100 | 5.62899500  |
| H | -2.23778000 | 3.90436600  | 1.35474300  | H                    | 0.04470000  | -3.90571200 | 4.74164800  |
| H | -1.82969500 | 2.43725800  | 2.30645100  | H                    | -3.75499800 | -1.08878000 | 5.34607100  |
| C | 0.67082400  | 4.60347500  | -1.84862400 | Rh                   | -1.33102700 | 0.92865600  | 0.87029900  |
| H | 0.27455100  | 5.14036700  | -2.71968800 |                      |             |             |             |
| H | 0.79994800  | 5.33367100  | -1.04827200 | <b>H<sub>2</sub></b> |             |             |             |
| H | 1.65479200  | 4.22311700  | -2.13169900 | H                    | 0.00000000  | 0.00000000  | 0.37139400  |
| C | -0.30452300 | 2.45224400  | -2.66521000 | H                    | 0.00000000  | 0.00000000  | -0.37139400 |
| H | -0.59422900 | 2.98266200  | -3.58118800 |                      |             |             |             |
| H | 0.68362100  | 2.01899300  | -2.83559300 | <b>TS1</b>           |             |             |             |
| H | -1.01908700 | 1.63974900  | -2.51700400 | Fe                   | 0.15009800  | -3.47516200 | 0.27452300  |
| C | -1.73715000 | 4.04098100  | -1.36597200 | C                    | 1.13287300  | -1.76674200 | -0.50607300 |
| H | -2.46469600 | 3.27258000  | -1.08263500 | C                    | 0.63481100  | -3.94563500 | 2.25314100  |

|   |             |             |             |            |             |             |             |
|---|-------------|-------------|-------------|------------|-------------|-------------|-------------|
| C | 1.28769600  | -2.90193200 | -1.36242800 | H          | 4.19585900  | 2.17003000  | -2.97175700 |
| H | 2.22316100  | -3.37782900 | -1.62310700 | H          | 3.17744100  | 1.81433600  | -4.36413600 |
| C | -0.28667400 | -1.52957700 | -0.36715300 | P          | -0.96966200 | 0.06080900  | 0.14244000  |
| C | 0.25666600  | -5.52192800 | 0.60939700  | C          | -2.75479600 | 0.00594000  | -0.30583000 |
| H | 0.42017600  | -6.24928500 | -0.17478500 | C          | -3.25693200 | 0.53214800  | -1.54468200 |
| C | -0.97618000 | -2.50971800 | -1.16638500 | C          | -3.62235700 | -0.59144900 | 0.59607800  |
| H | -2.04889700 | -2.58893000 | -1.27310200 | C          | -2.44938700 | 1.18930400  | -2.51236800 |
| C | -0.77692300 | -4.05634900 | 2.05884300  | C          | -4.66214600 | 0.39794300  | -1.81985300 |
| H | -1.54505500 | -3.50320900 | 2.58207500  | C          | -5.00074400 | -0.71908500 | 0.31467200  |
| C | 1.27117100  | -4.85649800 | 1.35856300  | H          | -3.24619400 | -0.96682200 | 1.54310800  |
| H | 2.33756400  | -5.00440300 | 1.25015200  | C          | -2.99030500 | 1.67906400  | -3.68149600 |
| C | -0.00312700 | -3.34248300 | -1.78117700 | H          | -1.38887100 | 1.31511000  | -2.31643800 |
| H | -0.20761900 | -4.19947700 | -2.40911700 | C          | -5.18587200 | 0.90966800  | -3.03786000 |
| C | -1.00907500 | -5.02583400 | 1.04172900  | C          | -5.50548200 | -0.23724900 | -0.87095300 |
| H | -1.97435300 | -5.31335100 | 0.64651400  | H          | -5.65341900 | -1.19471800 | 1.04041800  |
| H | 1.13756900  | -3.29272000 | 2.95472200  | C          | -4.37125600 | 1.53591800  | -3.95267200 |
| C | 2.23018200  | -0.91841800 | 0.09311200  | H          | -2.35103100 | 2.18103800  | -4.40242200 |
| H | 1.90153600  | -0.60806400 | 1.09148500  | H          | -6.24950300 | 0.79859900  | -3.23183300 |
| C | 3.52449100  | -1.73804100 | 0.27279100  | H          | -6.56492900 | -0.33004500 | -1.09552700 |
| H | 4.24701100  | -1.23331300 | 0.91290000  | H          | -4.78388800 | 1.92421700  | -4.87896000 |
| H | 3.26124600  | -2.68227100 | 0.75983000  | C          | -0.95857700 | 0.40883000  | 1.94965100  |
| H | 4.01617000  | -1.97722400 | -0.67176400 | C          | -1.09663000 | 1.80124300  | 2.29557300  |
| P | 2.37340600  | 0.82681900  | -0.76482100 | C          | -0.68567900 | -0.52144400 | 2.93259200  |
| C | 2.66713200  | 0.60481100  | -2.65592100 | C          | -1.36073900 | 2.83399500  | 1.33391500  |
| C | 3.89307800  | 1.67957900  | 0.09152700  | C          | -0.92332300 | 2.18739700  | 3.66377600  |
| C | 5.25638900  | 1.10335300  | -0.35880600 | C          | -0.54851900 | -0.13402900 | 4.28803200  |
| H | 6.03620000  | 1.52806100  | 0.28526000  | H          | -0.55578900 | -1.55948900 | 2.65477400  |
| H | 5.33130700  | 0.01899400  | -0.28463100 | C          | -1.41496400 | 4.16587100  | 1.71348600  |
| H | 5.49941000  | 1.39254100  | -1.38491100 | H          | -1.70922300 | 2.58493500  | 0.32199300  |
| C | 3.71160500  | 1.50985400  | 1.61822700  | C          | -0.99957200 | 3.56340300  | 4.01269600  |
| H | 2.73563100  | 1.88484800  | 1.94680100  | C          | -0.66074100 | 1.18934800  | 4.64308100  |
| H | 3.82005700  | 0.47772200  | 1.95980200  | H          | -0.34297100 | -0.88815200 | 5.04203100  |
| H | 4.48118300  | 2.10110700  | 2.12917100  | C          | -1.22651600 | 4.53538400  | 3.06205500  |
| C | 3.93920900  | 3.20322400  | -0.18154500 | H          | -1.62882000 | 4.92568200  | 0.96781900  |
| H | 4.88762800  | 3.58409900  | 0.21634000  | H          | -0.87115000 | 3.83947000  | 5.05616000  |
| H | 3.90353100  | 3.46169400  | -1.24101000 | H          | -0.53953800 | 1.49450500  | 5.67898200  |
| H | 3.13615800  | 3.73659500  | 0.33043700  | H          | -1.27719000 | 5.58108800  | 3.34868100  |
| C | 3.66311900  | -0.52495200 | -2.99246000 | Rh         | 0.45411800  | 1.98755000  | -0.24878300 |
| H | 3.81178600  | -0.53964000 | -4.07937400 | H          | 1.28328000  | 3.33867100  | -0.04828500 |
| H | 4.64400900  | -0.38594800 | -2.53321600 | H          | 0.97953700  | 3.10497500  | -1.23042900 |
| H | 3.27585700  | -1.50612200 | -2.70930800 |            |             |             |             |
| C | 1.30875800  | 0.27607100  | -3.31189900 | <b>CP2</b> |             |             |             |
| H | 1.46885600  | 0.12971800  | -4.38762300 | Fe         | 0.51530500  | -3.32785500 | 0.20237600  |
| H | 0.85589200  | -0.63648100 | -2.91824300 | C          | 1.43251000  | -1.47793400 | -0.29479000 |
| H | 0.60158400  | 1.09957300  | -3.18495200 | C          | 0.81406500  | -3.95767700 | 2.17507900  |
| C | 3.17448500  | 1.92521400  | -3.27289800 | C          | 1.86515600  | -2.53976200 | -1.15263600 |
| H | 2.52386200  | 2.77275100  | -3.03407200 | H          | 2.87828600  | -2.90572800 | -1.25087600 |

|   |             |             |             |           |             |             |             |
|---|-------------|-------------|-------------|-----------|-------------|-------------|-------------|
| C | -0.00649700 | -1.38463800 | -0.41617300 | P         | -0.96963700 | 0.09363100  | 0.04419500  |
| C | 0.59386700  | -5.39281100 | 0.38164100  | C         | -2.64590600 | -0.19444800 | -0.66667200 |
| H | 0.83036200  | -6.05555000 | -0.44031000 | C         | -2.97157500 | 0.22365800  | -2.00316900 |
| C | -0.42544700 | -2.37495700 | -1.37265300 | C         | -3.61906900 | -0.77879100 | 0.12762300  |
| H | -1.44591300 | -2.55553000 | -1.68023800 | C         | -2.04251300 | 0.80485900  | -2.91161400 |
| C | -0.57292700 | -4.04225100 | 1.84282300  | C         | -4.32121200 | 0.04418800  | -2.46507100 |
| H | -1.38146500 | -3.51791700 | 2.33316300  | C         | -4.93734900 | -0.97187500 | -0.34345600 |
| C | 1.53415000  | -4.79500200 | 1.27157700  | H         | -3.37637300 | -1.08152900 | 1.14155600  |
| H | 2.60668300  | -4.93709500 | 1.25009800  | C         | -2.41760100 | 1.21488700  | -4.17302900 |
| C | 0.72738700  | -3.07223300 | -1.82980900 | H         | -0.99508300 | 0.88979100  | -2.62408600 |
| H | 0.73301700  | -3.90282700 | -2.52308600 | C         | -4.67781600 | 0.47503500  | -3.77175900 |
| C | -0.70767300 | -4.92534900 | 0.73349600  | C         | -5.28041500 | -0.56002500 | -1.60955300 |
| H | -1.63131700 | -5.17478300 | 0.22830800  | H         | -5.67520600 | -1.43266800 | 0.30621100  |
| H | 1.24687200  | -3.37205700 | 2.97584400  | C         | -3.75287100 | 1.05478100  | -4.60927600 |
| C | 2.29810600  | -0.53883200 | 0.51211600  | H         | -1.68189200 | 1.65413800  | -4.84067100 |
| H | 1.71950200  | -0.23155700 | 1.39008000  | H         | -5.70457300 | 0.33540100  | -4.09965200 |
| C | 3.58102100  | -1.22020500 | 1.02813800  | H         | -6.29586100 | -0.68906200 | -1.97491900 |
| H | 4.09420200  | -0.61601700 | 1.77701500  | H         | -4.03987400 | 1.38112800  | -5.60412500 |
| H | 3.29180000  | -2.16105000 | 1.50731200  | C         | -1.22165600 | 0.24437500  | 1.85960400  |
| H | 4.29408500  | -1.45696700 | 0.23709200  | C         | -1.89961900 | 1.40309100  | 2.38349100  |
| P | 2.48879300  | 1.18009100  | -0.36067400 | C         | -0.66176700 | -0.67349700 | 2.72874300  |
| C | 3.33950500  | 0.99647900  | -2.07643500 | C         | -2.49443300 | 2.40990000  | 1.57310500  |
| C | 3.46354400  | 2.29587300  | 0.86684900  | C         | -1.98292900 | 1.55619900  | 3.80952000  |
| C | 4.97883200  | 1.98292000  | 0.85903500  | C         | -0.75022500 | -0.51319300 | 4.13240800  |
| H | 5.45263600  | 2.57675500  | 1.64973800  | H         | -0.14503600 | -1.53496300 | 2.32545000  |
| H | 5.21200800  | 0.93556000  | 1.05751900  | C         | -3.12132300 | 3.50343500  | 2.13288600  |
| H | 5.45492700  | 2.26714100  | -0.08253100 | H         | -2.47725800 | 2.31616300  | 0.49199600  |
| C | 2.89007900  | 2.06549000  | 2.28418500  | C         | -2.64342300 | 2.69030400  | 4.35370800  |
| H | 1.80731900  | 2.22526400  | 2.32249500  | C         | -1.39894300 | 0.57727300  | 4.65874200  |
| H | 3.10864200  | 1.07109700  | 2.68191600  | H         | -0.30502000 | -1.25783800 | 4.78610400  |
| H | 3.35088400  | 2.79260100  | 2.96292000  | C         | -3.19980400 | 3.64787800  | 3.53683900  |
| C | 3.27649400  | 3.79045000  | 0.52395900  | H         | -3.56657300 | 4.25634600  | 1.48890700  |
| H | 3.87350600  | 4.37496200  | 1.23455400  | H         | -2.70007700 | 2.78757900  | 5.43479000  |
| H | 3.61801800  | 4.04461400  | -0.48100900 | H         | -1.47317900 | 0.70990000  | 5.73499500  |
| H | 2.23499200  | 4.10408000  | 0.61752600  | H         | -3.70110000 | 4.51069700  | 3.96490600  |
| C | 4.48529800  | -0.03515100 | -2.08095700 | Rh        | 0.41672300  | 1.91712200  | -0.83642700 |
| H | 4.94166800  | -0.03900200 | -3.07851500 | H         | 0.40798300  | 2.63082200  | 0.50484100  |
| H | 5.27446200  | 0.20583000  | -1.36377700 | H         | 1.25640200  | 3.16725800  | -1.35333300 |
| H | 4.12795400  | -1.04810800 | -1.88642000 |           |             |             |             |
| C | 2.23473300  | 0.53709700  | -3.05804700 | <b>1a</b> |             |             |             |
| H | 2.67229500  | 0.42252800  | -4.05789200 | C         | -2.98629500 | -1.61414700 | -0.00005500 |
| H | 1.78654800  | -0.41958100 | -2.78086400 | C         | -1.61665400 | -1.83851900 | -0.00007400 |
| H | 1.44494800  | 1.29794000  | -3.15018600 | C         | -0.74103200 | -0.74072300 | -0.00002500 |
| C | 3.88182300  | 2.35179600  | -2.57688700 | C         | -1.23245700 | 0.57403700  | 0.00004500  |
| H | 3.11343400  | 3.12926300  | -2.58159600 | C         | -2.62243800 | 0.77419100  | 0.00006500  |
| H | 4.73810400  | 2.70569000  | -1.99808600 | C         | -3.49682200 | -0.30316800 | 0.00001500  |
| H | 4.22500600  | 2.21717000  | -3.61000900 | H         | -3.66776600 | -2.46204100 | -0.00009500 |



|   |             |             |             |
|---|-------------|-------------|-------------|
| H | -1.19490000 | -2.83885400 | -0.00012800 |
| C | -0.28121600 | 1.71715000  | 0.00009900  |
| H | -2.97250300 | 1.80251800  | 0.00012000  |
| H | -4.57187100 | -0.13927000 | 0.00003100  |
| C | 1.10634200  | 1.30687700  | 0.00009200  |
| C | 1.49880100  | 0.00330200  | -0.00000100 |
| H | 1.89686500  | 2.04700200  | 0.00017000  |
| O | -0.68099000 | 2.89047500  | 0.00020400  |
| O | 0.58804900  | -1.01815600 | -0.00004900 |
| C | 2.98911300  | -0.47209200 | -0.00004500 |
| O | 3.14342400  | -1.70955900 | -0.00028600 |
| O | 3.80028100  | 0.48089000  | 0.00003000  |

### CP3

|    |            |             |             |
|----|------------|-------------|-------------|
| Fe | 3.64224500 | -1.24226300 | -2.08570300 |
| C  | 2.64113600 | 0.53589100  | -1.44628600 |
| C  | 4.63253300 | -2.77833500 | -1.06777300 |
| C  | 2.92079700 | 0.53763400  | -2.85061400 |
| H  | 3.54145900 | 1.25449400  | -3.37119500 |
| C  | 1.83035000 | -0.62461500 | -1.16532000 |
| C  | 5.68019700 | -1.29193500 | -2.49310000 |
| H  | 6.24767100 | -0.44973000 | -2.86708300 |
| C  | 1.60754800 | -1.30325200 | -2.41458700 |
| H  | 1.03880400 | -2.21268900 | -2.53996700 |
| C  | 4.34049900 | -3.17218200 | -2.40563000 |
| H  | 3.70724700 | -3.99874900 | -2.69971100 |
| C  | 5.45928500 | -1.61374900 | -1.12020700 |
| H  | 5.85007800 | -1.06724300 | -0.27166000 |
| C  | 2.26158800 | -0.57677200 | -3.44864600 |
| H  | 2.30128500 | -0.85495500 | -4.49370300 |
| C  | 4.98954000 | -2.25553000 | -3.28719300 |
| H  | 4.93216300 | -2.26419600 | -4.36783000 |
| H  | 4.26516800 | -3.26100700 | -0.17290700 |
| C  | 3.03081500 | 1.59787600  | -0.44792500 |
| H  | 3.18729100 | 1.09745600  | 0.51268900  |
| C  | 4.36472500 | 2.27084500  | -0.82514400 |
| H  | 4.74921600 | 2.89720800  | -0.01959400 |
| H  | 5.10545000 | 1.48569900  | -1.01398800 |
| H  | 4.30007800 | 2.88602200  | -1.72405900 |
| P  | 1.50754300 | 2.69836300  | 0.02667100  |
| C  | 0.93689600 | 3.70819700  | -1.51827500 |
| C  | 2.21891400 | 3.88319500  | 1.39498500  |
| C  | 3.07601200 | 5.04710000  | 0.84750100  |
| H  | 3.51641200 | 5.58299100  | 1.69841900  |
| H  | 3.89894700 | 4.72525400  | 0.20695800  |
| H  | 2.47549300 | 5.77156500  | 0.29095500  |
| C  | 3.07287000 | 3.04053100  | 2.37105700  |

|   |             |             |             |
|---|-------------|-------------|-------------|
| H | 2.52299600  | 2.17292700  | 2.74880800  |
| H | 4.01210300  | 2.69180000  | 1.93336900  |
| H | 3.33267900  | 3.66635600  | 3.23430900  |
| C | 1.07581800  | 4.50624400  | 2.22962200  |
| H | 1.52372600  | 5.19729100  | 2.95649100  |
| H | 0.36626400  | 5.07538600  | 1.62526000  |
| H | 0.51570800  | 3.74708700  | 2.77689200  |
| C | 2.07869000  | 4.31394600  | -2.36032900 |
| H | 1.63348000  | 4.93681600  | -3.14756200 |
| H | 2.75795100  | 4.94893600  | -1.78795000 |
| H | 2.66443600  | 3.53936800  | -2.86234500 |
| C | 0.12628700  | 2.75639200  | -2.42873500 |
| H | -0.20064700 | 3.32462500  | -3.31068300 |
| H | 0.72196800  | 1.91284500  | -2.78513500 |
| H | -0.76342700 | 2.37077300  | -1.92866900 |
| C | -0.01602700 | 4.83627000  | -1.06649500 |
| H | -0.82887100 | 4.45325700  | -0.44308000 |
| H | 0.49812300  | 5.63524100  | -0.52467700 |
| H | -0.46530200 | 5.28743200  | -1.96085500 |
| P | 0.79135300  | -0.83660600 | 0.33458300  |
| C | -0.02843900 | -2.48186800 | 0.01041300  |
| C | -1.15876300 | -2.60623900 | -0.87181000 |
| C | 0.46391000  | -3.61653900 | 0.63492200  |
| C | -1.72380500 | -1.51079000 | -1.57905500 |
| C | -1.74624400 | -3.90444500 | -1.06876400 |
| C | -0.12024200 | -4.88918800 | 0.43754800  |
| H | 1.31689400  | -3.54095600 | 1.29943100  |
| C | -2.80823900 | -1.67744600 | -2.41342100 |
| H | -1.31498700 | -0.51689200 | -1.44794900 |
| C | -2.86038000 | -4.04266300 | -1.94015100 |
| C | -1.20439800 | -5.02955900 | -0.39422800 |
| H | 0.29557700  | -5.75037300 | 0.95329900  |
| C | -3.38467700 | -2.95520800 | -2.60004600 |
| H | -3.22733500 | -0.81196800 | -2.91790100 |
| H | -3.29319200 | -5.03150900 | -2.07278600 |
| H | -1.66317500 | -6.00333000 | -0.54894700 |
| H | -4.24038400 | -3.07394300 | -3.25907700 |
| C | 1.86121900  | -1.21241900 | 1.80415400  |
| C | 1.25680300  | -1.37870100 | 3.10304900  |
| C | 3.23715200  | -1.26192300 | 1.68877100  |
| C | -0.14633200 | -1.32042900 | 3.33128500  |
| C | 2.11194300  | -1.62301100 | 4.23231200  |
| C | 4.07351300  | -1.48183600 | 2.81057100  |
| H | 3.68846200  | -1.13953500 | 0.71315700  |
| C | -0.67044200 | -1.50208500 | 4.59344000  |
| H | -0.82493600 | -1.10121400 | 2.51502200  |
| C | 1.53666100  | -1.81233800 | 5.51755900  |

|                                     |             |             |             |   |             |             |             |
|-------------------------------------|-------------|-------------|-------------|---|-------------|-------------|-------------|
| C                                   | 3.52127400  | -1.66589400 | 4.05385600  | H | -7.33047000 | -0.40433200 | 0.19232700  |
| H                                   | 5.15175500  | -1.51248800 | 2.67600700  | C | -3.03780000 | -1.41461300 | 1.92006100  |
| C                                   | 0.17385400  | -1.75703600 | 5.69831400  | H | -2.59525100 | -2.35351200 | 2.21835900  |
| H                                   | -1.74525100 | -1.44142100 | 4.73816700  | C | -5.42094400 | -3.15504500 | 0.40018000  |
| H                                   | 2.19969100  | -1.99971700 | 6.35907600  | H | -5.00665600 | -4.03908100 | 0.86642000  |
| H                                   | 4.15224300  | -1.84512200 | 4.92131200  | C | -5.79376100 | -1.42475400 | -1.08313700 |
| H                                   | -0.25478600 | -1.90126800 | 6.68631600  | H | -5.73821300 | -0.78208700 | -1.95237200 |
| Rh                                  | -0.23831000 | 1.41412600  | 0.79439300  | C | -4.10242700 | -0.74472700 | 2.58154600  |
| H                                   | 0.56751100  | 1.40011300  | 2.10421300  | H | -4.63257000 | -1.10189200 | 3.45448900  |
| H                                   | -0.78125100 | 2.80184300  | 1.28791900  | C | -6.41529500 | -2.29824200 | 0.96092700  |
| C                                   | -8.04585300 | 0.89213800  | -2.44813600 | H | -6.88414900 | -2.41706400 | 1.92884500  |
| C                                   | -6.68933600 | 1.07721600  | -2.21715700 | H | -4.29262700 | -3.03166200 | -1.52666200 |
| C                                   | -6.16058900 | 0.71702100  | -0.97170800 | C | -3.39783300 | 1.68712900  | -0.23192300 |
| C                                   | -6.97089300 | 0.17886700  | 0.03894000  | H | -3.13652000 | 1.27161500  | -1.21068900 |
| C                                   | -8.34030500 | 0.00173800  | -0.22067900 | C | -4.74939800 | 2.41109100  | -0.39250200 |
| C                                   | -8.87684200 | 0.35273600  | -1.45025600 | H | -4.75580600 | 3.07817300  | -1.25490800 |
| H                                   | -8.46567100 | 1.16965400  | -3.41116200 | H | -5.52759400 | 1.65793700  | -0.55587300 |
| H                                   | -6.02880900 | 1.49484800  | -2.97014800 | H | -5.03234400 | 2.99520100  | 0.48489500  |
| C                                   | -6.38000800 | -0.18774600 | 1.34799500  | P | -1.80674900 | 2.73660100  | 0.08821900  |
| H                                   | -8.94948000 | -0.41594900 | 0.57483300  | C | -1.85646900 | 3.50393000  | 1.85369400  |
| H                                   | -9.93635100 | 0.21394400  | -1.64499800 | C | -1.84296900 | 4.08623500  | -1.29337200 |
| C                                   | -4.94492900 | 0.07258600  | 1.43398500  | C | -2.85686400 | 5.22053500  | -1.01942600 |
| C                                   | -4.25259700 | 0.59199400  | 0.39377600  | H | -2.89014000 | 5.87798100  | -1.89731100 |
| H                                   | -4.41808000 | -0.15569100 | 2.35165400  | H | -3.87318200 | 4.86760800  | -0.83988700 |
| O                                   | -7.04285600 | -0.66428800 | 2.26912700  | H | -2.55819400 | 5.83862500  | -0.16874600 |
| O                                   | -4.81793900 | 0.91809100  | -0.79658500 | C | -2.18781100 | 3.38829200  | -2.63004600 |
| C                                   | -2.77681500 | 0.87694600  | 0.42958400  | H | -1.52106200 | 2.54251100  | -2.83142400 |
| O                                   | -2.21436900 | 1.41010700  | -0.56169600 | H | -3.22023800 | 3.03292900  | -2.67941300 |
| O                                   | -2.14262600 | 0.55806200  | 1.48553400  | H | -2.05688400 | 4.11085800  | -3.44490400 |
| <b>MeO<sup>+</sup>H<sub>2</sub></b> |             |             |             | C | -0.45040200 | 4.73253900  | -1.47240500 |
| C                                   | 0.79778400  | 0.00000000  | 0.01886300  | H | -0.53313200 | 5.50716600  | -2.24576400 |
| H                                   | 1.10567200  | 0.90114000  | -0.50713900 | H | -0.08139200 | 5.21163400  | -0.56367200 |
| H                                   | 1.10567300  | -0.90113500 | -0.50714800 | H | 0.29565900  | 4.00431900  | -1.79532000 |
| H                                   | 1.06602700  | -0.00000500 | 1.07457500  | C | -3.25041000 | 3.97501900  | 2.30871100  |
| O                                   | -0.72021400 | 0.00000000  | -0.09108700 | H | -3.16004300 | 4.42789400  | 3.30447900  |
| H                                   | -1.15118200 | -0.80339900 | 0.27761500  | H | -3.67868200 | 4.73136400  | 1.64522500  |
| H                                   | -1.15118200 | 0.80339900  | 0.27761500  | H | -3.95459100 | 3.14452500  | 2.39632200  |
| <b>CP4</b>                          |             |             |             | C | -1.35778700 | 2.39239100  | 2.80943500  |
| Fe                                  | -4.65970700 | -1.23741900 | 0.66043500  | H | -1.36606700 | 2.77800500  | 3.83753400  |
| C                                   | -3.49658200 | 0.53568200  | 0.73984700  | H | -1.98705300 | 1.49941000  | 2.78669400  |
| C                                   | -5.03909700 | -2.61790300 | -0.86309300 | H | -0.31717500 | 2.10945200  | 2.59315400  |
| C                                   | -4.39991500 | 0.43978700  | 1.84675000  | C | -0.86614500 | 4.68335100  | 1.96321900  |
| H                                   | -5.19943000 | 1.13210300  | 2.07265200  | H | 0.14133600  | 4.40433000  | 1.64260100  |
| C                                   | -2.64853700 | -0.63613700 | 0.77072200  | H | -1.18784700 | 5.56079700  | 1.39639700  |
| C                                   | -6.64619900 | -1.22959500 | 0.04492100  | H | -0.80763700 | 4.98354400  | 3.01713700  |
|                                     |             |             |             | P | -1.02317100 | -0.80307600 | -0.05624200 |
|                                     |             |             |             | C | -0.42935100 | -2.41700600 | 0.65192800  |

|    |             |             |             |
|----|-------------|-------------|-------------|
| C  | 0.32674800  | -2.48397400 | 1.87308100  |
| C  | -0.77749300 | -3.59137500 | 0.00345600  |
| C  | 0.71809000  | -1.34294500 | 2.62442100  |
| C  | 0.70682200  | -3.77706200 | 2.37783000  |
| C  | -0.40058900 | -4.85757700 | 0.50596000  |
| H  | -1.35244500 | -3.55049200 | -0.91589400 |
| C  | 1.44580200  | -1.45961700 | 3.78838700  |
| H  | 0.45253400  | -0.35429100 | 2.27187000  |
| C  | 1.45193500  | -3.86483500 | 3.58518200  |
| C  | 0.32800000  | -4.94666400 | 1.66832600  |
| H  | -0.69156400 | -5.75421700 | -0.03367100 |
| C  | 1.81580200  | -2.73376100 | 4.27898800  |
| H  | 1.74169200  | -0.56139000 | 4.32169600  |
| H  | 1.72704900  | -4.85053800 | 3.95240800  |
| H  | 0.62215200  | -5.91586800 | 2.06352700  |
| H  | 2.38400400  | -2.81562000 | 5.20126900  |
| C  | -1.20879100 | -1.18895600 | -1.86082100 |
| C  | -0.05423200 | -1.54001500 | -2.65365700 |
| C  | -2.43322500 | -1.04710400 | -2.48503100 |
| C  | 1.24978500  | -1.71352000 | -2.11270300 |
| C  | -0.22905800 | -1.76835300 | -4.06262700 |
| C  | -2.58818600 | -1.23630000 | -3.88086200 |
| H  | -3.30609600 | -0.80692300 | -1.89052600 |
| C  | 2.30026300  | -2.14322300 | -2.90087500 |
| H  | 1.43358300  | -1.50934400 | -1.06551900 |
| C  | 0.87787300  | -2.18419200 | -4.85013700 |
| C  | -1.51117900 | -1.59358900 | -4.65257300 |
| H  | -3.56938900 | -1.11190700 | -4.33048700 |
| C  | 2.11715300  | -2.38883400 | -4.28374900 |
| H  | 3.26854700  | -2.33080300 | -2.44094300 |
| H  | 0.72055600  | -2.36448200 | -5.91053100 |
| H  | -1.62354600 | -1.75879600 | -5.72096300 |
| H  | 2.94237200  | -2.75614700 | -4.88893000 |
| Rh | 0.08543000  | 1.42608700  | 0.09400900  |
| H  | 0.11561000  | 1.54679300  | -1.42106000 |
| H  | 0.80133400  | 2.82936600  | 0.05010400  |
| C  | 8.60200800  | 0.22319800  | 2.58926200  |
| C  | 7.24253000  | 0.44545200  | 2.74276200  |
| C  | 6.43179000  | 0.41197100  | 1.60468700  |
| C  | 6.96417300  | 0.15869200  | 0.32055700  |
| C  | 8.35428900  | -0.06587100 | 0.19541900  |
| C  | 9.15907800  | -0.03287000 | 1.31810600  |
| H  | 9.24699100  | 0.24746400  | 3.46217100  |
| H  | 6.79236600  | 0.64515800  | 3.70886100  |
| C  | 6.05045900  | 0.14900700  | -0.78592100 |
| H  | 8.76594300  | -0.26064300 | -0.78850700 |
| H  | 10.22658700 | -0.20394900 | 1.22494300  |

|   |            |             |             |
|---|------------|-------------|-------------|
| C | 4.69073000 | 0.39200000  | -0.53027600 |
| C | 4.25963400 | 0.61681500  | 0.75538300  |
| H | 3.95421600 | 0.41266800  | -1.32117700 |
| O | 6.51985500 | -0.09281500 | -1.98515900 |
| O | 5.09743900 | 0.63336400  | 1.78927600  |
| C | 2.79789200 | 0.90791600  | 1.08813400  |
| O | 2.52037300 | 1.42920500  | 2.16563800  |
| O | 2.04027000 | 0.56373500  | 0.11486100  |
| C | 4.65354200 | 0.82909600  | -4.96315600 |
| H | 3.74157400 | 1.39815900  | -5.17013500 |
| H | 5.49144400 | 1.52104500  | -4.86302000 |
| H | 4.85543100 | 0.13666400  | -5.78798100 |
| O | 4.54222000 | 0.13154200  | -3.71270500 |
| H | 3.78147700 | -0.47713000 | -3.73611800 |
| H | 5.78719400 | -0.06605600 | -2.68018800 |

## TS2

|    |             |             |             |
|----|-------------|-------------|-------------|
| Fe | 4.54124000  | -1.21973200 | -0.50384300 |
| C  | 2.54192700  | -1.89038500 | -0.27384600 |
| C  | 5.48858900  | 0.16542300  | -1.75485000 |
| C  | 3.47003400  | -2.75564800 | 0.38602200  |
| H  | 3.63448300  | -3.80026300 | 0.15859100  |
| C  | 2.70519700  | -0.56903400 | 0.29194700  |
| C  | 5.83590000  | -2.11492200 | -1.86453500 |
| H  | 5.78225800  | -3.15175600 | -2.16960400 |
| C  | 3.72672900  | -0.65649900 | 1.30516000  |
| H  | 4.08123800  | 0.16479300  | 1.91046000  |
| C  | 6.34754000  | -0.19988500 | -0.67932300 |
| H  | 6.74155800  | 0.46900200  | 0.07425300  |
| C  | 5.16797600  | -1.01878700 | -2.48802400 |
| H  | 4.53951300  | -1.07937400 | -3.36722200 |
| C  | 4.18053200  | -2.00191900 | 1.36750800  |
| H  | 4.97040000  | -2.37518000 | 2.00571500  |
| C  | 6.56395300  | -1.60894700 | -0.74764000 |
| H  | 7.14731700  | -2.19675300 | -0.05129300 |
| H  | 5.13049900  | 1.16429600  | -1.96313600 |
| C  | 1.50378300  | -2.27774400 | -1.29767800 |
| H  | 1.40702700  | -1.43987900 | -1.99649600 |
| C  | 1.93460000  | -3.50494100 | -2.12345900 |
| H  | 1.29405700  | -3.65839900 | -2.99262600 |
| H  | 2.95094300  | -3.33035000 | -2.49246700 |
| H  | 1.94586600  | -4.43137100 | -1.54755700 |
| P  | -0.26161900 | -2.24243400 | -0.52270100 |
| C  | -0.41037300 | -3.56736500 | 0.86908600  |
| C  | -1.44566200 | -2.61418900 | -1.99922400 |
| C  | -1.49895100 | -4.10446100 | -2.40268000 |
| H  | -2.11558400 | -4.19824000 | -3.30532500 |

|   |             |             |             |            |             |             |             |
|---|-------------|-------------|-------------|------------|-------------|-------------|-------------|
| H | -0.52059600 | -4.52940300 | -2.63320000 | C          | -1.21783900 | 4.27090600  | -1.06450400 |
| H | -1.96499300 | -4.72416100 | -1.63243500 | H          | -0.37055100 | 2.85662700  | 0.27127600  |
| C | -0.97725900 | -1.76940200 | -3.20746000 | C          | -0.43166400 | 4.27098000  | -3.34890900 |
| H | -0.86842700 | -0.70945600 | -2.95223900 | C          | 1.30879400  | 2.67208100  | -4.06123800 |
| H | -0.03528500 | -2.11951300 | -3.63729500 | H          | 2.82949700  | 1.24720800  | -4.54550600 |
| H | -1.73640400 | -1.83893700 | -3.99585900 | C          | -1.25370800 | 4.80193400  | -2.37737100 |
| C | -2.88020900 | -2.15655000 | -1.65578800 | H          | -1.85198300 | 4.69624600  | -0.29130400 |
| H | -3.52759500 | -2.38186500 | -2.51274200 | H          | -0.43667200 | 4.67638600  | -4.35767800 |
| H | -3.29713400 | -2.66982300 | -0.78714000 | H          | 1.25982100  | 3.09345900  | -5.06200400 |
| H | -2.93041200 | -1.08091800 | -1.47316800 | H          | -1.90418600 | 5.64194400  | -2.60744300 |
| C | 0.29812300  | -4.90011800 | 0.56053600  | Rh         | -0.69105100 | -0.20323400 | 0.54222600  |
| H | 0.10082500  | -5.60072300 | 1.38192900  | H          | -1.08115300 | 0.31110600  | -0.83061300 |
| H | -0.05899200 | -5.36854600 | -0.36002500 | H          | -2.37054800 | -0.53878000 | 0.74707500  |
| H | 1.38199800  | -4.77887100 | 0.49555900  | C          | -7.38803300 | -2.22553000 | 1.65685400  |
| C | 0.22554300  | -2.94702100 | 2.13540400  | C          | -6.15649000 | -1.80095200 | 2.14410900  |
| H | 0.16674100  | -3.67330400 | 2.95629900  | C          | -5.44967900 | -0.83450600 | 1.42851400  |
| H | 1.27684800  | -2.68348200 | 1.99947200  | C          | -5.95526800 | -0.28530900 | 0.23596000  |
| H | -0.32453300 | -2.05455000 | 2.46498700  | C          | -7.20181600 | -0.73217600 | -0.23841200 |
| C | -1.89524600 | -3.84467700 | 1.18904500  | C          | -7.91071400 | -1.69503500 | 0.46619300  |
| H | -2.45118600 | -2.92632200 | 1.40122100  | H          | -7.95001500 | -2.97314300 | 2.20840400  |
| H | -2.40711800 | -4.38745200 | 0.39086500  | H          | -5.73928000 | -2.18807400 | 3.06757700  |
| H | -1.94112000 | -4.47288400 | 2.08749400  | C          | -5.15576900 | 0.72408700  | -0.43026900 |
| P | 1.45895000  | 0.75734500  | 0.20125800  | H          | -7.59279500 | -0.30752000 | -1.15628600 |
| C | 2.05687600  | 2.02083500  | 1.40191200  | H          | -8.87380800 | -2.03541100 | 0.09934600  |
| C | 1.93473200  | 1.83546300  | 2.82319700  | C          | -3.93552400 | 1.06214500  | 0.09868900  |
| C | 2.65192900  | 3.17183700  | 0.90763200  | C          | -3.42691100 | 0.40531900  | 1.26526900  |
| C | 1.38444800  | 0.67562600  | 3.43034000  | H          | -3.29791600 | 1.80243400  | -0.36919300 |
| C | 2.41687700  | 2.87495000  | 3.69020100  | O          | -5.67223900 | 1.27500800  | -1.52368500 |
| C | 3.13093500  | 4.18288100  | 1.77004000  | O          | -4.25266100 | -0.42182500 | 1.95893100  |
| H | 2.75457600  | 3.31500000  | -0.16239900 | C          | -2.50710600 | 1.25117100  | 2.19098200  |
| C | 1.29461900  | 0.55138200  | 4.79890500  | O          | -2.99684000 | 1.75972000  | 3.17473300  |
| H | 1.03272300  | -0.13651400 | 2.80374800  | O          | -1.28544900 | 1.37619000  | 1.74764200  |
| C | 2.30500400  | 2.72061900  | 5.09864300  | C          | -4.19898100 | 2.98161800  | -4.26579800 |
| C | 3.00648600  | 4.03905200  | 3.13144800  | H          | -3.34436800 | 2.98422600  | -4.95161000 |
| H | 3.58966600  | 5.07137700  | 1.34684500  | H          | -4.92770200 | 2.24556800  | -4.61048100 |
| C | 1.75434200  | 1.58584600  | 5.64639100  | H          | -4.66891200 | 3.97281500  | -4.26109100 |
| H | 0.86325700  | -0.34640700 | 5.23241000  | O          | -3.79707200 | 2.57878400  | -2.95055700 |
| H | 2.66817200  | 3.52143500  | 5.73743900  | H          | -3.11872100 | 3.19552700  | -2.62440500 |
| H | 3.36293400  | 4.81607500  | 3.80279200  | H          | -5.00177300 | 1.85911100  | -1.97390900 |
| H | 1.67234500  | 1.47952800  | 6.72383200  |            |             |             |             |
| C | 1.43265400  | 1.59398900  | -1.44689300 | <b>CP5</b> |             |             |             |
| C | 0.50409800  | 2.66576600  | -1.72019200 | Fe         | 4.50530300  | -1.45785400 | -0.14160600 |
| C | 2.23477200  | 1.11394700  | -2.46520300 | C          | 2.46162500  | -1.85361600 | -0.55633700 |
| C | -0.36508900 | 3.23239600  | -0.74499400 | C          | 5.86457300  | 0.01377600  | -0.75163900 |
| C | 0.45946200  | 3.20388900  | -3.05269200 | C          | 3.10825100  | -2.97846100 | 0.04311100  |
| C | 2.17790000  | 1.64888700  | -3.77481100 | H          | 3.23029500  | -3.95384300 | -0.40827900 |
| H | 2.93201600  | 0.31318400  | -2.25411200 | C          | 2.58836900  | -0.74218100 | 0.36011800  |

|   |             |             |             |    |             |             |             |
|---|-------------|-------------|-------------|----|-------------|-------------|-------------|
| C | 6.03341500  | -2.21415900 | -1.33407300 | C  | 1.91352700  | 1.61617400  | 1.90105700  |
| H | 5.97377200  | -3.14134800 | -1.88884200 | C  | 1.44366100  | 1.11487100  | 3.16480200  |
| C | 3.30526000  | -1.21519600 | 1.51821300  | C  | 2.66996400  | 2.77765000  | 1.85660800  |
| H | 3.56572800  | -0.62126500 | 2.38182100  | C  | 0.69878400  | -0.08400600 | 3.32245300  |
| C | 6.37380100  | -0.69605000 | 0.37276000  | C  | 1.76062600  | 1.86008700  | 4.35101900  |
| H | 6.61010000  | -0.27043400 | 1.33895200  | C  | 2.98526700  | 3.49449900  | 3.03180900  |
| C | 5.65007200  | -0.92413300 | -1.80831400 | H  | 3.02728800  | 3.15881700  | 0.90669300  |
| H | 5.27424800  | -0.70107600 | -2.79847300 | C  | 0.27447200  | -0.51365600 | 4.56036200  |
| C | 3.60637100  | -2.59057800 | 1.32358600  | H  | 0.46861300  | -0.68925000 | 2.45079900  |
| H | 4.16984900  | -3.21724800 | 2.00201500  | C  | 1.30412700  | 1.39516000  | 5.61412500  |
| C | 6.48036400  | -2.07305300 | 0.01264200  | C  | 2.53057100  | 3.04858600  | 4.24994900  |
| H | 6.80687200  | -2.87590400 | 0.66038500  | H  | 3.57866900  | 4.40075100  | 2.95988700  |
| H | 5.65889600  | 1.07482700  | -0.78670100 | C  | 0.57376900  | 0.23498100  | 5.72202800  |
| C | 1.66529000  | -1.82205700 | -1.83627600 | H  | -0.29564100 | -1.43431800 | 4.64608100  |
| H | 1.80660200  | -0.83259300 | -2.28335100 | H  | 1.54729800  | 1.97805900  | 6.49854600  |
| C | 2.15883200  | -2.85256900 | -2.86788100 | H  | 2.75677900  | 3.60110400  | 5.15820600  |
| H | 1.70118500  | -2.69954700 | -3.84633300 | H  | 0.22914800  | -0.10975500 | 6.69217800  |
| H | 3.24027600  | -2.72560600 | -2.98791900 | C  | 2.01770700  | 1.89730200  | -1.04953900 |
| H | 1.97757800  | -3.88597000 | -2.56999400 | C  | 1.31015900  | 3.13651800  | -1.26777900 |
| P | -0.20922500 | -1.71615400 | -1.42354300 | C  | 3.01169900  | 1.50896900  | -1.93141000 |
| C | -0.79652300 | -3.32546400 | -0.54020500 | C  | 0.27049400  | 3.62237500  | -0.42717800 |
| C | -1.08547500 | -1.46623400 | -3.12208500 | C  | 1.68763700  | 3.93714400  | -2.40205900 |
| C | -1.20960200 | -2.75517400 | -3.96384800 | C  | 3.36642100  | 2.30242900  | -3.04636300 |
| H | -1.64224500 | -2.49370700 | -4.93760700 | H  | 3.53980600  | 0.58080600  | -1.75810500 |
| H | -0.25050900 | -3.24018300 | -4.15597700 | C  | -0.35458600 | 4.82367100  | -0.69348900 |
| H | -1.87576400 | -3.49005300 | -3.50562200 | H  | -0.05331400 | 3.05457000  | 0.43736800  |
| C | -0.28097800 | -0.41356600 | -3.91979900 | C  | 1.02382300  | 5.17010200  | -2.64174900 |
| H | -0.11471700 | 0.50508400  | -3.34665300 | C  | 2.71758900  | 3.49193900  | -3.27300900 |
| H | 0.68785800  | -0.78678300 | -4.26269600 | H  | 4.15547300  | 1.96739600  | -3.71343100 |
| H | -0.85524000 | -0.14100700 | -4.81339100 | C  | 0.02226900  | 5.60880100  | -1.80653800 |
| C | -2.50191000 | -0.89028600 | -2.89580900 | H  | -1.14309700 | 5.16821900  | -0.03052800 |
| H | -2.97284200 | -0.73713900 | -3.87493600 | H  | 1.32729100  | 5.76275500  | -3.50094200 |
| H | -3.15069200 | -1.55550200 | -2.32299400 | H  | 2.98418400  | 4.11284500  | -4.12452800 |
| H | -2.47370800 | 0.07748100  | -2.38732500 | H  | -0.47594600 | 6.55477900  | -1.99748400 |
| C | -0.16068500 | -4.61793800 | -1.08701000 | Rh | -0.65455400 | 0.06318000  | 0.07580400  |
| H | -0.61760500 | -5.47556100 | -0.57710100 | H  | -0.73830900 | 0.95925200  | -1.14543000 |
| H | -0.32446000 | -4.75146500 | -2.15944800 | H  | -2.53790500 | -0.09545800 | 0.06240000  |
| H | 0.91259800  | -4.66066400 | -0.88739300 | C  | -6.02654800 | -3.34523700 | 2.21161100  |
| C | -0.42102000 | -3.17475200 | 0.95282900  | C  | -4.91551000 | -2.51615500 | 2.35035400  |
| H | -0.72863200 | -4.08168200 | 1.48911100  | C  | -4.79919300 | -1.39377800 | 1.52990800  |
| H | 0.65166700  | -3.04395300 | 1.11205900  | C  | -5.78911100 | -1.07985500 | 0.58275900  |
| H | -0.95551100 | -2.33587000 | 1.41855800  | C  | -6.90188100 | -1.92666600 | 0.46171900  |
| C | -2.33284900 | -3.45070800 | -0.61595000 | C  | -7.01783600 | -3.05640700 | 1.26474000  |
| H | -2.84319000 | -2.55230300 | -0.25994900 | H  | -6.12181100 | -4.21990200 | 2.84843000  |
| H | -2.69298400 | -3.68196300 | -1.62081400 | H  | -4.14433600 | -2.71469300 | 3.08759600  |
| H | -2.64421800 | -4.27536500 | 0.03687900  | C  | -5.63080400 | 0.15315700  | -0.18112200 |
| P | 1.55494400  | 0.75623200  | 0.31834300  | H  | -7.66941100 | -1.67506200 | -0.26176500 |

|   |             |             |             |
|---|-------------|-------------|-------------|
| H | -7.88134600 | -3.70658300 | 1.16525400  |
| C | -4.48334400 | 0.87287400  | -0.06652300 |
| C | -3.38160300 | 0.40692400  | 0.78601600  |
| H | -4.34404900 | 1.80457000  | -0.60440900 |
| O | -6.68291100 | 0.50198700  | -0.93350000 |
| O | -3.69825100 | -0.59630500 | 1.71796200  |
| C | -2.61246000 | 1.53660200  | 1.54309600  |
| O | -3.23396100 | 2.34388000  | 2.19920800  |
| O | -1.30800700 | 1.49990900  | 1.39695600  |
| C | -6.88277800 | 3.51215700  | -3.06469500 |
| H | -6.51944500 | 4.51747700  | -3.30578400 |
| H | -6.56333300 | 2.82214200  | -3.84758500 |
| H | -7.97820500 | 3.51813800  | -3.01795000 |
| O | -6.30132800 | 3.03815500  | -1.84112900 |
| H | -6.57143600 | 3.62627600  | -1.11770200 |
| H | -6.53981000 | 1.39774800  | -1.33511900 |

### TS3

|    |             |             |             |
|----|-------------|-------------|-------------|
| Fe | 4.50499300  | -1.51698600 | -0.14433900 |
| C  | 2.46174400  | -1.90482400 | -0.56082600 |
| C  | 5.84830800  | -0.04218200 | -0.77829700 |
| C  | 3.10503500  | -3.03683100 | 0.02827300  |
| H  | 3.22203200  | -4.00958800 | -0.43040500 |
| C  | 2.59222700  | -0.80149300 | 0.36333100  |
| C  | 6.04474900  | -2.27917000 | -1.31650500 |
| H  | 5.99709100  | -3.21754600 | -1.85328500 |
| C  | 3.30388800  | -1.28531600 | 1.51882400  |
| H  | 3.56487300  | -0.69905300 | 2.38780000  |
| C  | 6.36219000  | -0.72426600 | 0.36152800  |
| H  | 6.59058700  | -0.27747500 | 1.32002200  |
| C  | 5.64845600  | -1.00284200 | -1.81697800 |
| H  | 5.27358600  | -0.80329500 | -2.81252100 |
| C  | 3.60362200  | -2.65984100 | 1.31207400  |
| H  | 4.16510900  | -3.29335100 | 1.98580600  |
| C  | 6.48607100  | -2.10656600 | 0.02845200  |
| H  | 6.81949400  | -2.89285100 | 0.69278000  |
| H  | 5.63067300  | 1.01548300  | -0.83573800 |
| C  | 1.65137600  | -1.85188400 | -1.82997000 |
| H  | 1.80120100  | -0.86230100 | -2.27127300 |
| C  | 2.10995000  | -2.87620800 | -2.88281800 |
| H  | 1.61358400  | -2.72292000 | -3.84256800 |
| H  | 3.18532700  | -2.74136600 | -3.04347600 |
| H  | 1.94814500  | -3.91174400 | -2.58243800 |
| P  | -0.20912500 | -1.70872900 | -1.38344400 |
| C  | -0.83060600 | -3.34402200 | -0.56763700 |
| C  | -1.10600300 | -1.34178800 | -3.04775400 |
| C  | -1.30643100 | -2.57806500 | -3.94931300 |

|   |             |             |             |
|---|-------------|-------------|-------------|
| H | -1.75518500 | -2.24861800 | -4.89496500 |
| H | -0.37235100 | -3.08773500 | -4.19561700 |
| H | -1.98779300 | -3.31081100 | -3.51024000 |
| C | -0.27311500 | -0.28326800 | -3.80667100 |
| H | -0.05658500 | 0.59203400  | -3.18514700 |
| H | 0.67034800  | -0.67994700 | -4.19234000 |
| H | -0.85370800 | 0.06105800  | -4.67116000 |
| C | -2.48365000 | -0.71251400 | -2.74699400 |
| H | -2.97456700 | -0.47521600 | -3.69934400 |
| H | -3.15066200 | -1.37637300 | -2.19322400 |
| H | -2.38090100 | 0.21867000  | -2.18200300 |
| C | -0.26001700 | -4.62521600 | -1.20706900 |
| H | -0.74491700 | -5.49266500 | -0.74168000 |
| H | -0.44449300 | -4.68660300 | -2.28264800 |
| H | 0.81322500  | -4.72517400 | -1.02845100 |
| C | -0.40149100 | -3.29586900 | 0.91797000  |
| H | -0.73665700 | -4.21666200 | 1.41268000  |
| H | 0.68096500  | -3.22524400 | 1.04481000  |
| H | -0.86991100 | -2.45475000 | 1.44475600  |
| C | -2.37234500 | -3.41246800 | -0.60065400 |
| H | -2.84036300 | -2.52989600 | -0.15691900 |
| H | -2.77397800 | -3.55144900 | -1.60693300 |
| H | -2.69023400 | -4.27611100 | -0.00366300 |
| P | 1.55516500  | 0.69640400  | 0.32469000  |
| C | 1.97797000  | 1.58217100  | 1.88399900  |
| C | 1.49335500  | 1.15671200  | 3.17121500  |
| C | 2.82006900  | 2.68102200  | 1.79402500  |
| C | 0.66470000  | 0.02156100  | 3.38114000  |
| C | 1.88516500  | 1.91485700  | 4.32820300  |
| C | 3.20845300  | 3.40870300  | 2.94016400  |
| H | 3.19069000  | 3.00369200  | 0.82747800  |
| C | 0.22930500  | -0.33132200 | 4.63986800  |
| H | 0.36594300  | -0.58447800 | 2.53056900  |
| C | 1.41667100  | 1.52737400  | 5.61280300  |
| C | 2.74127400  | 3.03715200  | 4.17835000  |
| H | 3.86782800  | 4.26421400  | 2.83032700  |
| C | 0.60298300  | 0.43013000  | 5.77091600  |
| H | -0.40865500 | -1.20164800 | 4.76461800  |
| H | 1.71825800  | 2.11909500  | 6.47310200  |
| H | 3.02417400  | 3.59820000  | 5.06529400  |
| H | 0.24888000  | 0.14543100  | 6.75700300  |
| C | 2.02028200  | 1.81894500  | -1.06601200 |
| C | 1.35187200  | 3.07993700  | -1.28422300 |
| C | 2.97043200  | 1.38695800  | -1.97608300 |
| C | 0.39690300  | 3.64416800  | -0.39432200 |
| C | 1.68644600  | 3.82991000  | -2.46553600 |
| C | 3.29574900  | 2.13734500  | -3.12930900 |

|             |             |             |             |
|-------------|-------------|-------------|-------------|
| H           | 3.48894700  | 0.45438600  | -1.79722200 |
| C           | -0.20608600 | 4.85539100  | -0.66548700 |
| H           | 0.14006500  | 3.13997700  | 0.52805000  |
| C           | 1.04641800  | 5.07418300  | -2.71272800 |
| C           | 2.65894200  | 3.32967600  | -3.37177000 |
| H           | 4.04962100  | 1.76363300  | -3.81625800 |
| C           | 0.11481800  | 5.57955900  | -1.83561500 |
| H           | -0.92691700 | 5.25927400  | 0.03969800  |
| H           | 1.31567400  | 5.62430200  | -3.61073700 |
| H           | 2.89574400  | 3.91355300  | -4.25753100 |
| H           | -0.36388600 | 6.53426300  | -2.03261300 |
| Rh          | -0.62147900 | -0.02888200 | 0.19678500  |
| H           | -1.23200100 | 1.45468200  | -0.07847100 |
| H           | -2.58001200 | -0.27710600 | 0.26978400  |
| C           | -6.56977700 | -3.16621600 | 2.05005600  |
| C           | -5.38379200 | -2.47071700 | 2.27948700  |
| C           | -5.09102200 | -1.35355100 | 1.49860000  |
| C           | -5.97321200 | -0.91496800 | 0.49745300  |
| C           | -7.16289800 | -1.62714500 | 0.28439700  |
| C           | -7.45830100 | -2.75014500 | 1.05113700  |
| H           | -6.80276500 | -4.03633300 | 2.65687900  |
| H           | -4.68901100 | -2.76892900 | 3.05787200  |
| C           | -5.61794500 | 0.29510300  | -0.23837700 |
| H           | -7.84635100 | -1.27983500 | -0.48248500 |
| H           | -8.38070000 | -3.29635500 | 0.88054600  |
| C           | -4.40296000 | 0.86920000  | -0.04823100 |
| C           | -3.42163200 | 0.27367000  | 0.88989100  |
| H           | -4.11591700 | 1.77054000  | -0.58037600 |
| O           | -6.56812300 | 0.76528900  | -1.05970100 |
| O           | -3.92524500 | -0.68479700 | 1.78198400  |
| C           | -2.68285400 | 1.35538600  | 1.72411400  |
| O           | -3.16631600 | 1.84544300  | 2.70935100  |
| O           | -1.47174100 | 1.70668700  | 1.24402300  |
| C           | -6.21204600 | 3.62133800  | -3.33518900 |
| H           | -5.76768800 | 4.59118400  | -3.58584900 |
| H           | -5.81466900 | 2.86324300  | -4.01226800 |
| H           | -7.30057200 | 3.67322400  | -3.45562600 |
| O           | -5.84266200 | 3.21689000  | -2.00823400 |
| H           | -6.19356800 | 3.86523100  | -1.37688300 |
| H           | -6.28766800 | 1.62765400  | -1.45950400 |
| <b>MeOH</b> |             |             |             |
| C           | 0.66187300  | -0.01961000 | 0.00001300  |
| H           | 1.07903000  | 0.99111000  | -0.00026700 |
| H           | 1.03683500  | -0.54351100 | 0.89331200  |
| H           | 1.03683900  | -0.54400600 | -0.89299400 |
| O           | -0.74854900 | 0.12244600  | -0.00002800 |

|            |             |             |             |
|------------|-------------|-------------|-------------|
| H          | -1.13555400 | -0.76550200 | 0.00009600  |
| <b>CP6</b> |             |             |             |
| H          | -1.46180700 | -0.20096600 | 1.59737800  |
| C          | 3.03075600  | -1.64740300 | -0.00418500 |
| C          | 1.65450200  | -1.87790700 | -0.01187800 |
| C          | 0.77777800  | -0.79426700 | 0.01057900  |
| C          | 1.26762200  | 0.52625000  | 0.02414800  |
| C          | 2.65215800  | 0.73759200  | 0.02938900  |
| C          | 3.53274700  | -0.34291500 | 0.02234500  |
| H          | 3.71268000  | -2.49335300 | -0.01290200 |
| H          | 1.24411200  | -2.88226400 | -0.03376000 |
| C          | 0.28027700  | 1.60578500  | -0.03361100 |
| H          | 3.02495000  | 1.75637700  | 0.03198300  |
| H          | 4.60470100  | -0.16934500 | 0.03087400  |
| C          | -1.02448100 | 1.33950000  | 0.14328900  |
| C          | -1.43736800 | -0.06594300 | 0.49740600  |
| H          | -1.80467900 | 2.09156500  | 0.08926700  |
| O          | 0.80080000  | 2.83812600  | -0.30110300 |
| O          | -0.56455800 | -1.06070900 | -0.04319700 |
| C          | -2.86744400 | -0.34450200 | 0.03632900  |
| O          | -3.05822500 | -1.60106500 | -0.39989800 |
| O          | -3.75230700 | 0.48008200  | 0.11100300  |
| H          | 0.08072700  | 3.48911500  | -0.28992100 |
| H          | -4.00564600 | -1.65974100 | -0.63023200 |
| <b>2a</b>  |             |             |             |
| H          | -1.27527700 | 0.10841500  | 1.42287300  |
| C          | 3.00983100  | -1.66402600 | -0.02001900 |
| C          | 1.63523400  | -1.86073600 | -0.10053000 |
| C          | 0.78050000  | -0.75296800 | -0.07440600 |
| C          | 1.30470700  | 0.55136800  | 0.01626800  |
| C          | 2.69704100  | 0.72249700  | 0.10665400  |
| C          | 3.54863500  | -0.37250400 | 0.09171700  |
| H          | 3.67091100  | -2.52644700 | -0.03593400 |
| H          | 1.20323200  | -2.85353900 | -0.17274800 |
| C          | 0.40466200  | 1.72599300  | -0.05770300 |
| H          | 3.07479100  | 1.73815300  | 0.17384300  |
| H          | 4.62341100  | -0.23381300 | 0.15894300  |
| C          | -1.06324600 | 1.39071300  | -0.29828100 |
| C          | -1.40773500 | 0.04119200  | 0.32942900  |
| H          | -1.23454500 | 1.34484600  | -1.38297900 |
| O          | 0.80048200  | 2.87790100  | 0.02100100  |
| O          | -0.56070500 | -1.00291300 | -0.15468300 |
| C          | -2.86462000 | -0.34301600 | 0.09393800  |
| O          | -3.05796500 | -1.67119700 | 0.01354800  |
| O          | -3.75840200 | 0.47167700  | 0.03472300  |

|   |             |             |             |
|---|-------------|-------------|-------------|
| H | -4.01977900 | -1.79418400 | -0.10516200 |
| H | -1.70007500 | 2.18175200  | 0.10204500  |

**CP3'**

|    |            |             |             |
|----|------------|-------------|-------------|
| Fe | 3.87988500 | -1.46752700 | -1.60356300 |
| C  | 2.89531400 | 0.38411900  | -1.18436100 |
| C  | 4.60230000 | -3.01989900 | -0.40077700 |
| C  | 3.39752900 | 0.31907300  | -2.52382400 |
| H  | 4.13560800 | 0.98147300  | -2.95568500 |
| C  | 1.98140900 | -0.71924000 | -1.00810700 |
| C  | 5.95084300 | -1.63619600 | -1.66765600 |
| H  | 6.61832500 | -0.83693700 | -1.96238800 |
| C  | 1.92432400 | -1.43061500 | -2.25771900 |
| H  | 1.32962800 | -2.31126400 | -2.44970500 |
| C  | 4.51100200 | -3.44069700 | -1.75899800 |
| H  | 3.88877600 | -4.24231800 | -2.13442100 |
| C  | 5.49074100 | -1.90189000 | -0.34295000 |
| H  | 5.76698200 | -1.34868400 | 0.54533600  |
| C  | 2.77853600 | -0.77918800 | -3.19068300 |
| H  | 2.96961800 | -1.09737600 | -4.20720300 |
| C  | 5.34612400 | -2.58767900 | -2.54233300 |
| H  | 5.46577600 | -2.62795000 | -3.61713900 |
| H  | 4.06773600 | -3.45457200 | 0.43232800  |
| C  | 3.18368000 | 1.45942200  | -0.16570200 |
| H  | 3.15726500 | 0.98770100  | 0.82156400  |
| C  | 4.59718400 | 2.04622900  | -0.34538700 |
| H  | 4.88962300 | 2.67489300  | 0.49620400  |
| H  | 5.31053700 | 1.21622300  | -0.39950300 |
| H  | 4.70757300 | 2.63622700  | -1.25663300 |
| P  | 1.67290500 | 2.65771900  | 0.02828600  |
| C  | 1.40852900 | 3.63193400  | -1.61898300 |
| C  | 2.23265600 | 3.85811100  | 1.45288200  |
| C  | 3.23214500 | 4.95039900  | 1.00902100  |
| H  | 3.56544200 | 5.49804100  | 1.90022200  |
| H  | 4.12440200 | 4.55826300  | 0.51789400  |
| H  | 2.76949500 | 5.68119200  | 0.34029200  |
| C  | 2.87191800 | 3.01098500  | 2.57800400  |
| H  | 2.21663100 | 2.19298100  | 2.89311500  |
| H  | 3.84355500 | 2.59058500  | 2.30490100  |
| H  | 3.03401800 | 3.65720500  | 3.45008700  |
| C  | 1.01311800 | 4.57575900  | 2.07646300  |
| H  | 1.38325600 | 5.27386400  | 2.83946300  |
| H  | 0.43948100 | 5.15350300  | 1.34875600  |
| H  | 0.33221900 | 3.87148100  | 2.55606700  |
| C  | 2.69976800 | 4.14342400  | -2.29045200 |
| H  | 2.41796700 | 4.75717200  | -3.15632500 |
| H  | 3.31764900 | 4.76427500  | -1.63862400 |

|    |             |             |             |
|----|-------------|-------------|-------------|
| H  | 3.31057100  | 3.32041800  | -2.67089000 |
| C  | 0.69612200  | 2.68649000  | -2.61419500 |
| H  | 0.54542500  | 3.23272400  | -3.55565800 |
| H  | 1.28946500  | 1.79810800  | -2.84233400 |
| H  | -0.28225300 | 2.37094200  | -2.24880200 |
| C  | 0.46321600  | 4.82502900  | -1.35891500 |
| H  | -0.45683400 | 4.51027700  | -0.85841400 |
| H  | 0.93249600  | 5.61790800  | -0.76950200 |
| H  | 0.18409300  | 5.26171800  | -2.32666300 |
| P  | 0.70053100  | -0.81562800 | 0.30577300  |
| C  | -0.17205100 | -2.41036200 | -0.11452300 |
| C  | -1.13557300 | -2.48919100 | -1.18114500 |
| C  | 0.11469800  | -3.55142500 | 0.61742300  |
| C  | -1.48098700 | -1.38603700 | -2.00824400 |
| C  | -1.77339700 | -3.75079100 | -1.44787200 |
| C  | -0.52067100 | -4.78664700 | 0.35239400  |
| H  | 0.84161100  | -3.51052200 | 1.42034200  |
| C  | -2.40331300 | -1.51272700 | -3.02470300 |
| H  | -1.03208600 | -0.41733100 | -1.82789500 |
| C  | -2.71847600 | -3.84713900 | -2.50489900 |
| C  | -1.44705300 | -4.88343300 | -0.65722400 |
| H  | -0.26862000 | -5.65408600 | 0.95622700  |
| C  | -3.02986800 | -2.75433900 | -3.28045300 |
| H  | -2.65533500 | -0.64502600 | -3.62707700 |
| H  | -3.19250500 | -4.80862400 | -2.68834300 |
| H  | -1.94222000 | -5.82850800 | -0.86787700 |
| H  | -3.75673500 | -2.83960700 | -4.08344300 |
| C  | 1.49228700  | -1.21196200 | 1.93735200  |
| C  | 0.67967200  | -1.30000400 | 3.12561600  |
| C  | 2.86283900  | -1.34758900 | 2.04599800  |
| C  | -0.73463800 | -1.14577400 | 3.12442100  |
| C  | 1.32649800  | -1.56165600 | 4.38236600  |
| C  | 3.49404800  | -1.58418400 | 3.29173600  |
| H  | 3.47019800  | -1.28129700 | 1.15322100  |
| C  | -1.46300400 | -1.25264300 | 4.29006300  |
| H  | -1.25942000 | -0.90947000 | 2.20602300  |
| C  | 0.54318500  | -1.67390700 | 5.56238800  |
| C  | 2.74035900  | -1.69695900 | 4.43357200  |
| H  | 4.57567900  | -1.68439200 | 3.33277300  |
| C  | -0.82411400 | -1.52596600 | 5.52114800  |
| H  | -2.54014400 | -1.11645100 | 4.25819400  |
| H  | 1.05019800  | -1.87612700 | 6.50309700  |
| H  | 3.21227900  | -1.88822800 | 5.39453100  |
| H  | -1.41234600 | -1.61062700 | 6.43091600  |
| Rh | -0.24531800 | 1.50075200  | 0.54933700  |
| H  | 0.34735700  | 1.48079000  | 1.96789900  |
| H  | -0.77258800 | 2.93091100  | 0.92514700  |



|   |              |             |             |
|---|--------------|-------------|-------------|
| C | -8.23092300  | -0.65530700 | 1.48717400  |
| C | -6.86356600  | -0.42500400 | 1.55546200  |
| C | -6.22167700  | 0.16061800  | 0.45777400  |
| C | -6.92957100  | 0.51521700  | -0.70039900 |
| C | -8.31257200  | 0.27075700  | -0.74374200 |
| C | -8.96100600  | -0.30809800 | 0.33656200  |
| H | -8.73831800  | -1.10855500 | 2.33436400  |
| H | -6.27899900  | -0.68370400 | 2.43226100  |
| C | -6.21916100  | 1.13303900  | -1.84481100 |
| H | -8.84159900  | 0.55254300  | -1.64879000 |
| H | -10.03045500 | -0.49394100 | 0.29775200  |
| C | -4.78868800  | 1.31536600  | -1.61335700 |
| C | -4.20091300  | 0.93500300  | -0.45491900 |
| H | -4.17731400  | 1.76442400  | -2.38561000 |
| O | -6.78739600  | 1.45651200  | -2.88808300 |
| O | -4.87339800  | 0.36674300  | 0.57654700  |
| C | -2.73235600  | 1.10678400  | -0.18155300 |
| O | -2.27896800  | 0.77593300  | 0.95724400  |
| O | -1.99914100  | 1.57868300  | -1.09221900 |

#### CP4'

|    |             |             |             |
|----|-------------|-------------|-------------|
| Fe | -4.24739700 | -0.65213700 | 2.00592500  |
| C  | -3.17431200 | 0.87809200  | 0.97727200  |
| C  | -5.08450700 | -2.48145800 | 1.42661200  |
| C  | -3.65110300 | 1.31271200  | 2.25543600  |
| H  | -4.34756700 | 2.12152900  | 2.43051600  |
| C  | -2.32793500 | -0.27191700 | 1.19807200  |
| C  | -6.32479600 | -0.65837900 | 2.11443400  |
| H  | -6.94014700 | 0.23170700  | 2.10440500  |
| C  | -2.28365600 | -0.50671400 | 2.61785700  |
| H  | -1.73751300 | -1.30088300 | 3.10560200  |
| C  | -4.99623100 | -2.40029900 | 2.84614600  |
| H  | -4.42181700 | -3.05765600 | 3.48531600  |
| C  | -5.90391800 | -1.40260400 | 0.97199500  |
| H  | -6.16588400 | -1.18557800 | -0.05546200 |
| C  | -3.08243000 | 0.47849100  | 3.26329200  |
| H  | -3.27495100 | 0.54347100  | 4.32609100  |
| C  | -5.76466900 | -1.27534600 | 3.27206000  |
| H  | -5.87124900 | -0.92746000 | 4.29112700  |
| H  | -4.59706500 | -3.21995500 | 0.80528200  |
| C  | -3.41633000 | 1.54111700  | -0.35731000 |
| H  | -3.42683000 | 0.75000200  | -1.11377700 |
| C  | -4.79138800 | 2.23436800  | -0.41601500 |
| H  | -5.06317200 | 2.51511800  | -1.43422000 |
| H  | -5.54729300 | 1.52673400  | -0.05873800 |
| H  | -4.85459200 | 3.12807100  | 0.20670500  |
| P  | -1.84479400 | 2.50774900  | -0.94462900 |

|   |             |             |             |
|---|-------------|-------------|-------------|
| C | -1.46997900 | 3.95058500  | 0.27769600  |
| C | -2.31088700 | 3.15647500  | -2.70311300 |
| C | -3.25966900 | 4.37649300  | -2.68416100 |
| H | -3.54994000 | 4.60692500  | -3.71697800 |
| H | -4.17806800 | 4.20942600  | -2.11929300 |
| H | -2.77245300 | 5.26896100  | -2.28278600 |
| C | -2.97730300 | 1.99465700  | -3.47633700 |
| H | -2.35908600 | 1.09067000  | -3.46959700 |
| H | -3.96956100 | 1.73718900  | -3.09654900 |
| H | -3.10163800 | 2.29877000  | -4.52288000 |
| C | -1.04339800 | 3.55671100  | -3.49235800 |
| H | -1.35993400 | 3.93603900  | -4.47258000 |
| H | -0.46751100 | 4.34491500  | -3.00325200 |
| H | -0.37920500 | 2.70586700  | -3.65306000 |
| C | -2.71919200 | 4.68143100  | 0.80621300  |
| H | -2.39358400 | 5.51630400  | 1.44031000  |
| H | -3.33860900 | 5.10032000  | 0.00895100  |
| H | -3.33926900 | 4.03105900  | 1.42714100  |
| C | -0.71410000 | 3.32100300  | 1.47267600  |
| H | -0.49063500 | 4.11176800  | 2.20182400  |
| H | -1.30301400 | 2.55776700  | 1.98698700  |
| H | 0.24676500  | 2.88902800  | 1.16695500  |
| C | -0.52567200 | 4.98252800  | -0.37573600 |
| H | 0.37406000  | 4.51311500  | -0.78271600 |
| H | -1.01138300 | 5.56043700  | -1.16640100 |
| H | -0.21033700 | 5.69477600  | 0.39772300  |
| P | -1.08154700 | -0.87604300 | -0.00047600 |
| C | -0.24481200 | -2.25403500 | 0.92625200  |
| C | 0.75102300  | -1.99410800 | 1.93217100  |
| C | -0.58649800 | -3.56564400 | 0.64002600  |
| C | 1.15591000  | -0.68746400 | 2.31859500  |
| C | 1.36378400  | -3.10794200 | 2.60465600  |
| C | 0.02206400  | -4.65589800 | 1.30437300  |
| H | -1.33805400 | -3.77559600 | -0.11272300 |
| C | 2.10924100  | -0.48659800 | 3.29350200  |
| H | 0.71144100  | 0.17491100  | 1.83670700  |
| C | 2.34103400  | -2.86769700 | 3.60862500  |
| C | 0.97874600  | -4.43167000 | 2.26441700  |
| H | -0.27612000 | -5.66838300 | 1.04784900  |
| C | 2.70900600  | -1.58643800 | 3.95032300  |
| H | 2.39691600  | 0.52785700  | 3.55396100  |
| H | 2.78867600  | -3.72281600 | 4.10940200  |
| H | 1.45052800  | -5.26348800 | 2.78180300  |
| H | 3.45182600  | -1.41814800 | 4.72535100  |
| C | -1.90255500 | -1.74781200 | -1.41308200 |
| C | -1.11207200 | -2.23681600 | -2.51548900 |
| C | -3.27872300 | -1.86705900 | -1.46144100 |

|             |             |             |             |   |             |             |             |
|-------------|-------------|-------------|-------------|---|-------------|-------------|-------------|
| C           | 0.30715400  | -2.14767800 | -2.57047100 | C | -5.65041900 | -2.02483900 | -0.24054900 |
| C           | -1.78928700 | -2.85529100 | -3.62246600 | C | -3.03466700 | -1.16460400 | -2.80237100 |
| C           | -3.93772700 | -2.46571600 | -2.56234100 | H | -3.12970800 | -1.97692000 | -3.51042900 |
| H           | -3.86800600 | -1.49944000 | -0.63170700 | C | -2.58535300 | 0.04366500  | -0.87437900 |
| C           | 1.00877100  | -2.63843700 | -3.65133600 | C | -6.43374600 | -0.86784900 | -2.07719900 |
| H           | 0.85582000  | -1.67021800 | -1.76684600 | H | -6.72946100 | -0.62262800 | -3.08874000 |
| C           | -1.03232800 | -3.35717700 | -4.71509100 | C | -3.27988600 | 0.89949400  | -1.80222900 |
| C           | -3.20703200 | -2.95368400 | -3.61733100 | H | -3.55468500 | 1.92834200  | -1.62162400 |
| H           | -5.02169600 | -2.54123200 | -2.56082400 | C | -5.89446800 | -0.67404500 | 0.15698300  |
| C           | 0.33940300  | -3.25379300 | -4.73361900 | H | -5.72557300 | -0.25599100 | 1.13974600  |
| H           | 2.09114100  | -2.54410400 | -3.67252800 | C | -5.98635900 | -2.14328600 | -1.62224500 |
| H           | -1.56251100 | -3.82414500 | -5.54141200 | H | -5.89577500 | -3.03644800 | -2.22645600 |
| H           | -3.70117700 | -3.42116200 | -4.46538300 | C | -3.53783000 | 0.15825900  | -2.98829100 |
| H           | 0.90679700  | -3.63802800 | -5.57655400 | H | -4.07729500 | 0.51675000  | -3.85495900 |
| Rh          | 0.02908900  | 1.16958500  | -0.89574800 | C | -6.37482000 | 0.04014000  | -0.97749800 |
| H           | -0.32487500 | 0.72512800  | -2.30419100 | H | -6.62188300 | 1.09305100  | -1.00711900 |
| H           | 0.68529200  | 2.40736300  | -1.62534800 | H | -5.28329900 | -2.82312800 | 0.39143300  |
| C           | 7.16194400  | -2.97210900 | -1.55467400 | C | -1.65561300 | -2.40355400 | -0.92845500 |
| C           | 5.88567000  | -2.43724900 | -1.47947800 | H | -1.83441700 | -2.39998400 | 0.15191200  |
| C           | 5.71221600  | -1.22954100 | -0.79732600 | C | -2.15330900 | -3.76142500 | -1.45872300 |
| C           | 6.79374600  | -0.55641800 | -0.19032300 | H | -3.24229700 | -3.79408500 | -1.34604600 |
| C           | 8.08463200  | -1.12556400 | -0.28376900 | H | -1.92502400 | -3.92652900 | -2.51259900 |
| C           | 8.26156600  | -2.31816700 | -0.95856200 | H | -1.74200400 | -4.59700200 | -0.89103300 |
| H           | 7.31651800  | -3.90886100 | -2.08113700 | P | 0.23546000  | -2.02221100 | -0.93200300 |
| H           | 5.02587900  | -2.92179600 | -1.92875900 | C | 0.87752100  | -1.88128800 | -2.74412600 |
| C           | 6.51148000  | 0.67427800  | 0.49212600  | C | 1.02952000  | -3.51449800 | -0.00228100 |
| H           | 8.91830600  | -0.61129300 | 0.18069100  | C | 1.13936000  | -4.80021200 | -0.85152600 |
| H           | 9.25104400  | -2.75752600 | -1.03215900 | H | 0.18733500  | -5.12741800 | -1.27284100 |
| C           | 5.18362000  | 1.13461800  | 0.52921900  | H | 1.85450200  | -4.69477500 | -1.67147900 |
| C           | 4.19381100  | 0.41528700  | -0.10057500 | H | 1.50627400  | -5.61052100 | -0.20916300 |
| H           | 4.90021200  | 2.04634600  | 1.04023000  | C | 0.17239000  | -3.79788200 | 1.25394800  |
| O           | 7.51435500  | 1.30582000  | 1.05195400  | H | 0.70172700  | -4.52710600 | 1.87909900  |
| O           | 4.44737200  | -0.72248000 | -0.74426600 | H | 0.01890900  | -2.89872500 | 1.86059800  |
| C           | 2.74012800  | 0.87065300  | -0.10861100 | H | -0.80514800 | -4.22685500 | 1.01904300  |
| O           | 1.98247400  | 0.23221100  | -0.90040400 | C | 2.44467000  | -3.14054200 | 0.49031400  |
| O           | 2.46319600  | 1.81233700  | 0.64986400  | H | 2.86603300  | -4.00574500 | 1.01760600  |
| C           | 7.19148500  | 4.80229800  | 1.64472100  | H | 3.12812500  | -2.88864300 | -0.32313600 |
| H           | 6.54298900  | 5.61986200  | 1.97331800  | H | 2.42147500  | -2.30032500 | 1.18714300  |
| H           | 7.14424800  | 4.72300700  | 0.55784800  | C | 0.26046100  | -2.89345100 | -3.72826400 |
| H           | 8.22497200  | 4.99528500  | 1.95169900  | H | 0.74247100  | -2.77174000 | -4.70690900 |
| O           | 6.71473300  | 3.54562700  | 2.16674800  | H | 0.40819100  | -3.93130300 | -3.41927900 |
| H           | 7.22649700  | 2.16354900  | 1.50094700  | H | -0.80822900 | -2.71973300 | -3.87360300 |
| H           | 6.73267300  | 3.57458800  | 3.13664900  | C | 0.52886300  | -0.45126000 | -3.21967400 |
|             |             |             |             | H | 0.87794800  | -0.32224800 | -4.25263900 |
|             |             |             |             | H | -0.54422000 | -0.24793500 | -3.20396500 |
| <b>TS2'</b> |             |             |             | H | 1.04116500  | 0.30801100  | -2.61246600 |
| Fe          | -4.48323900 | -0.72368400 | -1.38888400 | C | 2.41466200  | -2.01729200 | -2.77999800 |
| C           | -2.42647700 | -1.24482700 | -1.51004100 |   |             |             |             |

|    |             |             |             |
|----|-------------|-------------|-------------|
| H  | 2.75848300  | -1.77096800 | -3.79286700 |
| H  | 2.90686200  | -1.32866100 | -2.08666200 |
| H  | 2.75537900  | -3.03253100 | -2.56391300 |
| P  | -1.57278700 | 0.62488700  | 0.52910500  |
| C  | -1.96426800 | 2.42230500  | 0.65167700  |
| C  | -1.46403100 | 3.37167700  | -0.30635800 |
| C  | -2.75721500 | 2.86025900  | 1.70037800  |
| C  | -0.68427500 | 3.02148100  | -1.44157900 |
| C  | -1.78977200 | 4.75923200  | -0.12754600 |
| C  | -3.07694100 | 4.22709400  | 1.86310600  |
| H  | -3.14076900 | 2.14969700  | 2.42400600  |
| C  | -0.24036800 | 3.97198300  | -2.33417300 |
| H  | -0.44675500 | 1.97808400  | -1.62259400 |
| C  | -1.30981200 | 5.71800600  | -1.06056400 |
| C  | -2.59515200 | 5.15598400  | 0.97248000  |
| H  | -3.69813200 | 4.53269600  | 2.69955500  |
| C  | -0.55007200 | 5.33840100  | -2.14225500 |
| H  | 0.34962700  | 3.67009100  | -3.19538300 |
| H  | -1.56186600 | 6.76355800  | -0.90349800 |
| H  | -2.82759200 | 6.21071800  | 1.09496700  |
| H  | -0.19280700 | 6.08033800  | -2.85022400 |
| C  | -2.09624100 | -0.13506600 | 2.12520500  |
| C  | -1.40305200 | 0.17284200  | 3.35268300  |
| C  | -3.09971900 | -1.08734200 | 2.12621300  |
| C  | -0.35349700 | 1.12791500  | 3.45627100  |
| C  | -1.80219400 | -0.51979000 | 4.54830400  |
| C  | -3.47782800 | -1.76711100 | 3.30775400  |
| H  | -3.61461500 | -1.31241200 | 1.20159600  |
| C  | 0.26317000  | 1.37905000  | 4.66472400  |
| H  | -0.01750800 | 1.67367300  | 2.58243000  |
| C  | -1.14779300 | -0.23139500 | 5.77602400  |
| C  | -2.84277600 | -1.48550800 | 4.49271300  |
| H  | -4.27424700 | -2.50500900 | 3.26999400  |
| C  | -0.13499100 | 0.69796500  | 5.83766600  |
| H  | 1.06154200  | 2.11419100  | 4.71088200  |
| H  | -1.46693000 | -0.76173300 | 6.66969700  |
| H  | -3.12729700 | -1.99835400 | 5.40804600  |
| H  | 0.35671100  | 0.91150100  | 6.78227700  |
| Rh | 0.69997900  | 0.05018800  | 0.05576400  |
| H  | 0.77311600  | -0.68007400 | 1.38176300  |
| H  | 2.37955500  | -0.17999500 | -0.07244100 |
| C  | 6.61797100  | -2.33585200 | 2.33055300  |
| C  | 5.47377300  | -1.55063800 | 2.41825700  |
| C  | 5.14220500  | -0.72871800 | 1.34076100  |
| C  | 5.93953800  | -0.67205900 | 0.18448700  |
| C  | 7.09505900  | -1.47285000 | 0.12032700  |
| C  | 7.42709400  | -2.30117800 | 1.18263400  |

|   |            |             |             |
|---|------------|-------------|-------------|
| H | 6.88760900 | -2.97919100 | 3.16265800  |
| H | 4.84034600 | -1.55328900 | 3.29887100  |
| C | 5.54124500 | 0.25150600  | -0.85918500 |
| H | 7.71567000 | -1.42339100 | -0.76733700 |
| H | 8.31855300 | -2.91806600 | 1.13062800  |
| C | 4.36294600 | 0.94818000  | -0.72487900 |
| C | 3.53573500 | 0.76560300  | 0.42536800  |
| H | 4.03603000 | 1.64986000  | -1.48418800 |
| O | 6.37673900 | 0.37946900  | -1.88444100 |
| O | 4.02019500 | 0.04898000  | 1.47335500  |
| C | 2.67386500 | 1.96486800  | 0.91806000  |
| O | 1.39019400 | 1.86741800  | 0.78237600  |
| O | 3.30666900 | 2.89878700  | 1.37193600  |
| C | 6.20534200 | 3.68465700  | -2.96320500 |
| H | 5.73991400 | 4.53893400  | -3.46537900 |
| H | 6.01390900 | 3.75513600  | -1.89130900 |
| H | 7.28665200 | 3.69274500  | -3.14058700 |
| O | 5.60623200 | 2.45081600  | -3.40449700 |
| H | 6.07664700 | 1.10290800  | -2.50339100 |
| H | 5.74694500 | 2.35939500  | -4.36021200 |

### CP5'

|    |             |             |             |
|----|-------------|-------------|-------------|
| Fe | -4.43323500 | -0.24220300 | -1.61236300 |
| C  | -2.39537800 | -0.79984100 | -1.81584600 |
| C  | -5.89637900 | -0.53584500 | -0.14323100 |
| C  | -2.95314200 | -0.36914700 | -3.05929700 |
| H  | -3.04783000 | -0.97091400 | -3.95317900 |
| C  | -2.53134400 | 0.29327900  | -0.87805100 |
| C  | -5.97407500 | -1.48886400 | -2.24485900 |
| H  | -5.89133700 | -2.19762500 | -3.05836100 |
| C  | -3.16618700 | 1.38434400  | -1.57503600 |
| H  | -3.41327600 | 2.34449600  | -1.14679300 |
| C  | -6.31268800 | 0.46698200  | -1.06427700 |
| H  | -6.52471200 | 1.50059100  | -0.82508400 |
| C  | -5.68296400 | -1.74651000 | -0.87198600 |
| H  | -5.36673100 | -2.69626700 | -0.46049700 |
| C  | -3.40660000 | 0.97686900  | -2.91535000 |
| H  | -3.90401100 | 1.56403400  | -3.67582700 |
| C  | -6.36293600 | -0.12206700 | -2.36339800 |
| H  | -6.61488800 | 0.38864000  | -3.28343200 |
| H  | -5.74941800 | -0.39411000 | 0.91867500  |
| C  | -1.67308500 | -2.09224200 | -1.53110000 |
| H  | -1.89633700 | -2.36862300 | -0.49531400 |
| C  | -2.16219600 | -3.25199200 | -2.41747200 |
| H  | -1.76842100 | -4.21281800 | -2.08321600 |
| H  | -3.25412600 | -3.30198800 | -2.34539700 |
| H  | -1.90472200 | -3.13154300 | -3.47048500 |

|   |             |             |             |             |             |             |             |
|---|-------------|-------------|-------------|-------------|-------------|-------------|-------------|
| P | 0.21338200  | -1.75958600 | -1.36773700 | C           | -3.18358000 | -1.55488400 | 1.70608400  |
| C | 0.94760000  | -1.18229400 | -3.05388800 | C           | -0.43134400 | 0.13367400  | 3.66121400  |
| C | 0.96914100  | -3.43429200 | -0.78748500 | C           | -1.96461000 | -1.69183000 | 4.22993500  |
| C | 1.12495000  | -4.47926100 | -1.91399900 | C           | -3.62677500 | -2.50536200 | 2.65396300  |
| H | 1.47847500  | -5.41783500 | -1.46939300 | H           | -3.66798400 | -1.51046800 | 0.73983500  |
| H | 0.19058600  | -4.69939200 | -2.43419700 | C           | 0.14601700  | 0.02928400  | 4.91048900  |
| H | 1.86658000  | -4.18029100 | -2.65895600 | H           | -0.04656300 | 0.88182500  | 2.97806400  |
| C | 0.05369000  | -4.00806700 | 0.31936600  | C           | -1.35001000 | -1.76555500 | 5.50866300  |
| H | -0.13286600 | -3.28475100 | 1.12066800  | C           | -3.02864800 | -2.56887800 | 3.88928300  |
| H | -0.90917700 | -4.35993000 | -0.06091400 | H           | -4.44151200 | -3.17702500 | 2.39921300  |
| H | 0.55599200  | -4.87160400 | 0.77139800  | C           | -0.31401500 | -0.92506100 | 5.84585600  |
| C | 2.35663400  | -3.18870000 | -0.15377100 | H           | 0.96325200  | 0.69469600  | 5.17320100  |
| H | 2.75547700  | -4.15140500 | 0.18927300  | H           | -1.71754800 | -2.50284500 | 6.21777100  |
| H | 3.08136100  | -2.77046600 | -0.85492200 | H           | -3.36173500 | -3.29438400 | 4.62710200  |
| H | 2.30134900  | -2.52695300 | 0.71422500  | H           | 0.14881300  | -0.99065100 | 6.82608000  |
| C | 0.38197300  | -1.92061500 | -4.28244200 | Rh          | 0.65042700  | 0.00265700  | 0.14565700  |
| H | 0.92017500  | -1.57923900 | -5.17589200 | H           | 0.62094100  | -1.04389700 | 1.24235200  |
| H | 0.50540700  | -3.00475400 | -4.22195600 | H           | 2.53108600  | -0.11454000 | 0.08496800  |
| H | -0.67581200 | -1.69655900 | -4.44026400 | C           | 6.66128000  | -2.90600800 | 1.60683800  |
| C | 0.62495200  | 0.32438700  | -3.18838800 | C           | 5.48862600  | -2.22366500 | 1.92312100  |
| H | 1.02505500  | 0.68989800  | -4.14294800 | C           | 5.12567600  | -1.11128400 | 1.16366800  |
| H | -0.44671200 | 0.53469800  | -3.17494600 | C           | 5.92782800  | -0.66422200 | 0.09957700  |
| H | 1.10991300  | 0.91160300  | -2.39650600 | C           | 7.10721200  | -1.36391900 | -0.19994400 |
| C | 2.48556200  | -1.32204300 | -3.04335000 | C           | 7.46936700  | -2.48205800 | 0.54361000  |
| H | 2.94904100  | -0.81767800 | -2.18943500 | H           | 6.94865700  | -3.77244200 | 2.19532600  |
| H | 2.81904500  | -2.36203400 | -3.05606800 | H           | 4.85609700  | -2.52763700 | 2.75074400  |
| H | 2.87826800  | -0.84723100 | -3.95131800 | C           | 5.51004200  | 0.54517500  | -0.60022900 |
| P | -1.57245000 | 0.46009300  | 0.66112400  | H           | 7.72967100  | -1.00951800 | -1.01412100 |
| C | -1.88387400 | 2.18021100  | 1.22762000  | H           | 8.38255600  | -3.01887400 | 0.30652900  |
| C | -1.34131500 | 3.32146100  | 0.54012800  | C           | 4.30275600  | 1.10332600  | -0.31590200 |
| C | -2.67289200 | 2.36416400  | 2.35294300  | C           | 3.40487200  | 0.49612000  | 0.68044700  |
| C | -0.55723300 | 3.24372000  | -0.64164800 | H           | 3.96931700  | 2.01000500  | -0.81058900 |
| C | -1.62435200 | 4.62836900  | 1.06388300  | O           | 6.39373000  | 1.03847900  | -1.47842900 |
| C | -2.95157900 | 3.65541700  | 2.85284800  | O           | 3.97942700  | -0.45390800 | 1.53083100  |
| H | -3.08500400 | 1.50789000  | 2.87457800  | C           | 2.61871900  | 1.53249500  | 1.54508400  |
| C | -0.06979700 | 4.37339800  | -1.26108200 | O           | 1.32118300  | 1.54275100  | 1.33675400  |
| H | -0.35027900 | 2.27340600  | -1.08205000 | O           | 3.22548100  | 2.25540900  | 2.30413000  |
| C | -1.10098000 | 5.77535300  | 0.40776700  | C           | 6.06007700  | 4.15202300  | -3.41355000 |
| C | -2.42945600 | 4.76131400  | 2.22581200  | H           | 5.58642800  | 5.12856800  | -3.56478500 |
| H | -3.57155100 | 3.76139700  | 3.73769000  | H           | 7.15030200  | 4.26784700  | -3.41668300 |
| C | -0.33812700 | 5.65630000  | -0.73030500 | H           | 5.77031700  | 3.48657100  | -4.22863600 |
| H | 0.52344500  | 4.27912300  | -2.16649600 | O           | 5.59411800  | 3.53987300  | -2.20134600 |
| H | -1.32102800 | 6.75475200  | 0.82429300  | H           | 6.08812900  | 1.91846800  | -1.81886700 |
| H | -2.62837900 | 5.75820600  | 2.61048300  | H           | 5.84305000  | 4.10476700  | -1.45200000 |
| H | 0.05353600  | 6.54036700  | -1.22436300 |             |             |             |             |
| C | -2.15438800 | -0.67302400 | 1.98837500  | <b>TS3'</b> |             |             |             |
| C | -1.50051400 | -0.72118200 | 3.27463300  | Fe          | -4.42662300 | -0.07631800 | -1.68488200 |

|   |             |             |             |    |             |             |             |
|---|-------------|-------------|-------------|----|-------------|-------------|-------------|
| C | -2.40162100 | -0.67257900 | -1.89999500 | C  | 2.50537800  | -1.23165900 | -3.05340200 |
| C | -5.89369800 | -0.44589000 | -0.23855300 | H  | 2.94605900  | -0.71645200 | -2.19430100 |
| C | -2.93603900 | -0.16660500 | -3.12469200 | H  | 2.84032200  | -2.27132600 | -3.04274800 |
| H | -3.03355000 | -0.71788100 | -4.05009000 | H  | 2.92319400  | -0.76755800 | -3.95558200 |
| C | -2.52188100 | 0.37233600  | -0.90843200 | P  | -1.57097300 | 0.42325700  | 0.64527100  |
| C | -6.00456500 | -1.22011500 | -2.41122000 | C  | -1.91899600 | 2.09285900  | 1.34294000  |
| H | -5.94444400 | -1.86197800 | -3.28031600 | C  | -1.34458700 | 3.29495900  | 0.79687000  |
| C | -3.11883700 | 1.51457000  | -1.55280500 | C  | -2.79110200 | 2.17445500  | 2.41857100  |
| H | -3.34632100 | 2.45755400  | -1.07767300 | C  | -0.47730700 | 3.32924800  | -0.32848200 |
| C | -6.28215300 | 0.64132100  | -1.07245300 | C  | -1.68402600 | 4.54936600  | 1.41117700  |
| H | -6.46302200 | 1.65753400  | -0.74829100 | C  | -3.12411500 | 3.41451100  | 3.00665000  |
| C | -5.71892200 | -1.59821700 | -1.06519400 | H  | -3.22965400 | 1.27310300  | 2.83169500  |
| H | -5.43090000 | -2.58763900 | -0.73428100 | C  | 0.03660000  | 4.51481900  | -0.80706400 |
| C | -3.35749900 | 1.18192900  | -2.91453000 | H  | -0.21476700 | 2.40038600  | -0.82624100 |
| H | -3.83245700 | 1.82000000  | -3.64789500 | C  | -1.13241700 | 5.75441200  | 0.89796800  |
| C | -6.35308200 | 0.16264900  | -2.41519800 | C  | -2.57339800 | 4.57473900  | 2.51740300  |
| H | -6.59140000 | 0.75452600  | -3.28906300 | H  | -3.80875700 | 3.43806000  | 3.84890300  |
| H | -5.73941200 | -0.39709200 | 0.83062000  | C  | -0.28792800 | 5.74334100  | -0.18730300 |
| C | -1.69752100 | -1.98376500 | -1.66544200 | H  | 0.69663400  | 4.50608500  | -1.67012100 |
| H | -1.94102700 | -2.30605200 | -0.64889200 | H  | -1.39654900 | 6.69100100  | 1.38194200  |
| C | -2.17635700 | -3.10344300 | -2.60611400 | H  | -2.81455700 | 5.53312700  | 2.96991800  |
| H | -1.76278000 | -4.07364200 | -2.32590900 | H  | 0.12646000  | 6.67080500  | -0.57085400 |
| H | -3.26668100 | -3.17468500 | -2.52499700 | C  | -2.19126200 | -0.80899500 | 1.87215100  |
| H | -1.93424700 | -2.92502900 | -3.65413900 | C  | -1.59141300 | -0.95568000 | 3.17731700  |
| P | 0.18176200  | -1.66545000 | -1.44260300 | C  | -3.19275500 | -1.68223500 | 1.48153900  |
| C | 0.96842400  | -1.09347500 | -3.10977100 | C  | -0.59487500 | -0.08856500 | 3.70349000  |
| C | 0.91208100  | -3.33862200 | -0.83208600 | C  | -2.04234300 | -2.03670900 | 4.01296300  |
| C | 1.11497700  | -4.39058500 | -1.94265900 | C  | -3.63656700 | -2.73172500 | 2.31809400  |
| H | 1.46930400  | -5.31936300 | -1.47807600 | H  | -3.65617500 | -1.55545400 | 0.51219700  |
| H | 0.19747900  | -4.63028700 | -2.48474200 | C  | -0.05541000 | -0.29462900 | 4.95686300  |
| H | 1.87185700  | -4.08928800 | -2.67113500 | H  | -0.25592000 | 0.76790700  | 3.13562400  |
| C | -0.04448800 | -3.90403600 | 0.24285500  | C  | -1.46630700 | -2.21805500 | 5.29916500  |
| H | -0.25626400 | -3.17297400 | 1.03013500  | C  | -3.06396000 | -2.90982500 | 3.55375200  |
| H | -0.99302100 | -4.25647900 | -0.17243700 | H  | -4.42771900 | -3.39221400 | 1.97501200  |
| H | 0.43891200  | -4.76691800 | 0.71660600  | C  | -0.48735600 | -1.37075100 | 5.76423900  |
| C | 2.26816100  | -3.07131300 | -0.14531800 | H  | 0.70353500  | 0.38829100  | 5.32750900  |
| H | 2.65092300  | -4.01804900 | 0.25564400  | H  | -1.82163000 | -3.04175300 | 5.91296600  |
| H | 3.02531100  | -2.68208300 | -0.82902800 | H  | -3.38949700 | -3.71846100 | 4.20311900  |
| H | 2.16668600  | -2.37231300 | 0.68948700  | H  | -0.05525000 | -1.51831400 | 6.74947300  |
| C | 0.44395800  | -1.84483300 | -4.34949600 | Rh | 0.62259500  | 0.07398300  | 0.06844000  |
| H | 1.02384100  | -1.52363500 | -5.22408600 | H  | 1.12209400  | -0.05225400 | 1.61215000  |
| H | 0.54750700  | -2.92979500 | -4.26962900 | H  | 2.62547000  | 0.05415600  | -0.08902100 |
| H | -0.60245500 | -1.60693700 | -4.55510800 | C  | 6.36965300  | -3.10396700 | 1.68006100  |
| C | 0.64251500  | 0.41023200  | -3.26945200 | C  | 5.23411500  | -2.33405600 | 1.92856600  |
| H | 1.07922500  | 0.76941900  | -4.21040300 | C  | 5.01551300  | -1.18414300 | 1.17129600  |
| H | -0.43075000 | 0.60987200  | -3.30264500 | C  | 5.92697700  | -0.78066700 | 0.18158400  |
| H | 1.08007900  | 1.00567600  | -2.45775400 | C  | 7.06464700  | -1.56782600 | -0.05041500 |

|   |            |             |             |
|---|------------|-------------|-------------|
| C | 7.28240300 | -2.72742100 | 0.68777200  |
| H | 6.54285300 | -4.00191800 | 2.26604700  |
| H | 4.52085700 | -2.60329000 | 2.70083500  |
| C | 5.67110000 | 0.48484100  | -0.50404900 |
| H | 7.77230500 | -1.24715700 | -0.80692800 |
| H | 8.16491500 | -3.33143500 | 0.50161900  |
| C | 4.50231400 | 1.14102100  | -0.29387800 |
| C | 3.46032200 | 0.55967700  | 0.57488500  |
| H | 4.29660200 | 2.09924200  | -0.75778100 |
| O | 6.66980400 | 0.92453000  | -1.28344000 |
| O | 3.89520400 | -0.44390700 | 1.46997000  |
| C | 2.70140500 | 1.60981200  | 1.43302800  |
| O | 1.42177900 | 1.29043000  | 1.70068100  |
| O | 3.21817300 | 2.62830000  | 1.81575900  |
| C | 6.67830200 | 4.07209800  | -3.21259900 |
| H | 6.27029800 | 5.07457600  | -3.38458300 |
| H | 7.77268600 | 4.12332000  | -3.16843500 |
| H | 6.38553300 | 3.42304400  | -4.03975200 |
| O | 6.12475500 | 3.49138700  | -2.02264500 |
| H | 6.46548300 | 1.83235300  | -1.62545900 |
| H | 6.37229900 | 4.04157100  | -1.26222300 |

### CP6'

|   |             |             |             |
|---|-------------|-------------|-------------|
| H | 1.46180700  | -0.20096600 | 1.59737800  |
| C | -3.03075600 | -1.64740300 | -0.00418500 |
| C | -1.65450200 | -1.87790700 | -0.01187800 |
| C | -0.77777800 | -0.79426700 | 0.01057900  |
| C | -1.26762200 | 0.52625000  | 0.02414800  |
| C | -2.65215800 | 0.73759200  | 0.02938900  |
| C | -3.53274700 | -0.34291500 | 0.02234500  |
| H | -3.71268000 | -2.49335300 | -0.01290200 |
| H | -1.24411200 | -2.88226400 | -0.03376000 |
| C | -0.28027700 | 1.60578500  | -0.03361100 |
| H | -3.02495000 | 1.75637700  | 0.03198300  |
| H | -4.60470100 | -0.16934500 | 0.03087400  |
| C | 1.02448100  | 1.33950000  | 0.14328900  |
| C | 1.43736800  | -0.06594300 | 0.49740600  |
| H | 1.80467900  | 2.09156500  | 0.08926700  |
| O | -0.80080000 | 2.83812600  | -0.30110300 |
| O | 0.56455800  | -1.06070900 | -0.04319700 |
| C | 2.86744400  | -0.34450200 | 0.03632900  |
| O | 3.05822500  | -1.60106500 | -0.39989800 |
| O | 3.75230700  | 0.48008200  | 0.11100300  |
| H | -0.08072700 | 3.48911500  | -0.28992100 |
| H | 4.00564600  | -1.65974100 | -0.63023200 |

### 2a'

|   |             |             |             |
|---|-------------|-------------|-------------|
| H | 1.27527700  | 0.10841500  | 1.42287300  |
| C | -3.00983100 | -1.66402600 | -0.02001900 |
| C | -1.63523400 | -1.86073600 | -0.10053000 |
| C | -0.78050000 | -0.75296800 | -0.07440600 |
| C | -1.30470700 | 0.55136800  | 0.01626800  |
| C | -2.69704100 | 0.72249700  | 0.10665400  |
| C | -3.54863500 | -0.37250400 | 0.09171700  |
| H | -3.67091100 | -2.52644700 | -0.03593400 |
| H | -1.20323200 | -2.85353900 | -0.17274800 |
| C | -0.40466200 | 1.72599300  | -0.05770300 |
| H | -3.07479100 | 1.73815300  | 0.17384300  |
| H | -4.62341100 | -0.23381300 | 0.15894300  |
| C | 1.06324600  | 1.39071300  | -0.29828100 |
| C | 1.40773500  | 0.04119200  | 0.32942900  |
| H | 1.23454500  | 1.34484600  | -1.38297900 |
| O | -0.80048200 | 2.87790100  | 0.02100100  |
| O | 0.56070500  | -1.00291300 | -0.15468300 |
| C | 2.86462000  | -0.34301600 | 0.09393800  |
| O | 3.05796500  | -1.67119700 | 0.01354800  |
| O | 3.75840200  | 0.47167700  | 0.03472300  |
| H | 4.01977900  | -1.79418400 | -0.10516200 |
| H | 1.70007500  | 2.18175200  | 0.10204500  |

### TS2-2

|    |            |             |             |
|----|------------|-------------|-------------|
| Fe | 4.56305800 | -1.31989000 | -0.05280200 |
| C  | 2.52965200 | -1.91826500 | 0.06474100  |
| C  | 5.65112400 | -0.12574500 | -1.38272900 |
| C  | 3.36346500 | -2.71488100 | 0.90933100  |
| H  | 3.51194800 | -3.78346300 | 0.82888200  |
| C  | 2.68658200 | -0.54153100 | 0.47758500  |
| C  | 5.96675100 | -2.40086100 | -1.14303900 |
| H  | 5.92344200 | -3.46965500 | -1.30636300 |
| C  | 3.60327700 | -0.52274300 | 1.58845000  |
| H  | 3.92619000 | 0.35936600  | 2.12177100  |
| C  | 6.39486900 | -0.34227400 | -0.18734000 |
| H  | 6.72537800 | 0.42295200  | 0.50234600  |
| C  | 5.38300600 | -1.39872100 | -1.97457600 |
| H  | 4.84334900 | -1.57781300 | -2.89563300 |
| C  | 4.00470900 | -1.86013800 | 1.85553900  |
| H  | 4.71926800 | -2.16848800 | 2.60710700  |
| C  | 6.59233000 | -1.74799400 | -0.04033900 |
| H  | 7.09464600 | -2.23611000 | 0.78435700  |
| H  | 5.33559700 | 0.83685700  | -1.76156700 |
| C  | 1.57411700 | -2.39055300 | -1.00207900 |
| H  | 1.55832500 | -1.61866600 | -1.77623600 |
| C  | 2.04561200 | -3.68543500 | -1.68712600 |
| H  | 1.38277100 | -3.98691000 | -2.49979700 |

|   |             |             |             |    |             |             |             |
|---|-------------|-------------|-------------|----|-------------|-------------|-------------|
| H | 3.03658500  | -3.50330700 | -2.11681700 | C  | 1.53879400  | 1.26826300  | -1.68498100 |
| H | 2.13595400  | -4.52744800 | -1.00062500 | C  | 0.56241800  | 2.19226000  | -2.21563400 |
| P | -0.25277000 | -2.24752200 | -0.40663600 | C  | 2.43649100  | 0.66399400  | -2.54613400 |
| C | -0.64158800 | -3.62515100 | 0.89200200  | C  | -0.36943100 | 2.90890400  | -1.41243800 |
| C | -1.30096000 | -2.50585300 | -2.01875400 | C  | 0.54616200  | 2.42852800  | -3.63495400 |
| C | -1.50913400 | -3.97068800 | -2.45606000 | C  | 2.41635000  | 0.91111800  | -3.93991400 |
| H | -2.06065100 | -3.97177600 | -3.40493900 | H  | 3.17562000  | -0.01649400 | -2.14265000 |
| H | -0.57358800 | -4.50732400 | -2.62814500 | C  | -1.26680900 | 3.79471900  | -1.97785600 |
| H | -2.10444000 | -4.54237200 | -1.74016400 | H  | -0.37664900 | 2.78936100  | -0.33531900 |
| C | -0.61331800 | -1.73745300 | -3.17036500 | C  | -0.39664300 | 3.33815700  | -4.18386100 |
| H | -0.39551600 | -0.69682600 | -2.90676300 | C  | 1.48448400  | 1.76676100  | -4.47343300 |
| H | 0.31480000  | -2.21002700 | -3.50327400 | H  | 3.14283400  | 0.41946200  | -4.58054000 |
| H | -1.29226100 | -1.72130800 | -4.03179900 | C  | -1.28603100 | 4.01398600  | -3.37625700 |
| C | -2.68868300 | -1.86261300 | -1.80901300 | H  | -1.93959400 | 4.35160600  | -1.33065400 |
| H | -3.28163100 | -1.99711300 | -2.72273400 | H  | -0.38741500 | 3.50910800  | -5.25721400 |
| H | -3.24765000 | -2.30733000 | -0.98305800 | H  | 1.45713600  | 1.95959000  | -5.54271800 |
| H | -2.61289200 | -0.78741900 | -1.61959800 | H  | -1.97129600 | 4.73993100  | -3.80690800 |
| C | -0.09970400 | -5.01856300 | 0.50120600  | Rh | -0.69136500 | -0.08639800 | 0.45570000  |
| H | -0.51425100 | -5.75688700 | 1.19862900  | H  | -2.31855400 | -0.47344700 | 0.83551700  |
| H | -0.37351700 | -5.33312800 | -0.50671900 | H  | -0.29223400 | -0.68287000 | 1.78274000  |
| H | 0.98751300  | -5.06768900 | 0.59718500  | C  | -7.05666400 | -2.36207500 | 2.24794500  |
| C | -0.00082100 | -3.24746800 | 2.24824200  | C  | -5.87112700 | -1.73067600 | 2.60794300  |
| H | -0.11787700 | -4.09792600 | 2.93188200  | C  | -5.28587100 | -0.83997800 | 1.70769700  |
| H | 1.06727800  | -3.03027800 | 2.16977900  | C  | -5.87142100 | -0.56680400 | 0.45698500  |
| H | -0.49770600 | -2.39001800 | 2.71079500  | C  | -7.07124900 | -1.21806900 | 0.11533800  |
| C | -2.16730100 | -3.71612300 | 1.10946700  | C  | -7.65590400 | -2.11026400 | 1.00257000  |
| H | -2.60381100 | -2.74508200 | 1.36052600  | H  | -7.52292000 | -3.05492000 | 2.94186300  |
| H | -2.69766800 | -4.12705800 | 0.24656500  | H  | -5.39679000 | -1.90194100 | 3.56831700  |
| H | -2.35482000 | -4.39019700 | 1.95458700  | C  | -5.21227000 | 0.40245600  | -0.39501100 |
| P | 1.49579400  | 0.77985800  | 0.10013100  | H  | -7.52532500 | -1.00417100 | -0.84582700 |
| C | 2.08522600  | 2.25943700  | 1.02991000  | H  | -8.58196200 | -2.61011500 | 0.73707000  |
| C | 1.93958500  | 2.39682300  | 2.45622400  | C  | -4.01729300 | 0.94297900  | 0.01409600  |
| C | 2.70534700  | 3.26674000  | 0.30379300  | C  | -3.40414600 | 0.52575900  | 1.23821500  |
| C | 1.35167300  | 1.41621300  | 3.29887500  | H  | -3.49722800 | 1.67978100  | -0.58628800 |
| C | 2.43618300  | 3.59529300  | 3.07724700  | O  | -5.82118400 | 0.71378400  | -1.53357700 |
| C | 3.19333700  | 4.43595700  | 0.92700100  | O  | -4.13020500 | -0.21972000 | 2.11076800  |
| H | 2.82527200  | 3.16919400  | -0.76932600 | C  | -2.48177000 | 1.56879700  | 1.92326200  |
| C | 1.24592400  | 1.60620900  | 4.65922800  | O  | -2.92958100 | 2.21729200  | 2.84284600  |
| H | 0.97140000  | 0.50046500  | 2.86454200  | O  | -1.32127000 | 1.69071500  | 1.33988100  |
| C | 2.30889800  | 3.76233700  | 4.48278200  | C  | -5.15470600 | 3.90113500  | -2.93986300 |
| C | 3.05461000  | 4.59691400  | 2.28475900  | H  | -5.03754400 | 4.35855700  | -3.92879000 |
| H | 3.67225000  | 5.20138800  | 0.32387500  | H  | -6.21414600 | 3.70513400  | -2.76600900 |
| C | 1.72563100  | 2.79140100  | 5.26226200  | H  | -4.78989400 | 4.58906700  | -2.16773100 |
| H | 0.78295000  | 0.83988600  | 5.27430400  | O  | -4.48848200 | 2.63276700  | -2.87809900 |
| H | 2.68590400  | 4.67804200  | 4.93077100  | H  | -3.53330500 | 2.75993600  | -3.00410400 |
| H | 3.42085200  | 5.49585200  | 2.77404200  | H  | -5.28582800 | 1.37560800  | -2.05047300 |
| H | 1.63143700  | 2.93042600  | 6.33504100  |    |             |             |             |

**TS2'-2**

|    |             |             |             |    |             |             |             |
|----|-------------|-------------|-------------|----|-------------|-------------|-------------|
| Fe | -4.23513700 | -0.18904000 | -1.91924200 | H  | -0.02604100 | 0.05692700  | -3.51996600 |
| C  | -2.18876100 | -0.75830900 | -1.89718600 | H  | 1.50358200  | 0.59554700  | -2.80118200 |
| C  | -5.85301800 | -0.48117800 | -0.62271400 | C  | 2.82010700  | -1.72293600 | -2.63334400 |
| C  | -2.60134300 | -0.31000700 | -3.19070400 | H  | 3.16565800  | -1.05046700 | -1.84311900 |
| H  | -2.59964200 | -0.89974200 | -4.09780900 | H  | 3.12705800  | -2.74162400 | -2.38381600 |
| C  | -2.42557500 | 0.32307500  | -0.96762700 | H  | 3.34344700  | -1.44551500 | -3.55717600 |
| C  | -5.70290200 | -1.42359000 | -2.72561500 | P  | -1.60094700 | 0.46085900  | 0.65284000  |
| H  | -5.53486500 | -2.12940100 | -3.52839100 | C  | -2.09090600 | 2.10939500  | 1.32889200  |
| C  | -2.96926900 | 1.42622900  | -1.71581800 | C  | -1.58411200 | 3.35498900  | 0.81161000  |
| H  | -3.25766800 | 2.38264400  | -1.30478600 | C  | -2.98239400 | 2.12615300  | 2.39174000  |
| C  | -6.15841100 | 0.52896300  | -1.57922100 | C  | -0.69891800 | 3.46098300  | -0.29485500 |
| H  | -6.38863000 | 1.56291300  | -1.35903600 | C  | -2.01570300 | 4.57767600  | 1.43348900  |
| C  | -5.56843800 | -1.68977000 | -1.33030400 | C  | -3.40139200 | 3.33425300  | 2.99158100  |
| H  | -5.30526500 | -2.64334600 | -0.89118800 | H  | -3.37416300 | 1.19591300  | 2.78632000  |
| C  | -3.06075100 | 1.03712700  | -3.08099900 | C  | -0.26027000 | 4.68434600  | -0.75290800 |
| H  | -3.46759000 | 1.63653100  | -3.88466400 | H  | -0.36276100 | 2.56084500  | -0.79330800 |
| C  | -6.06827300 | -0.05361800 | -2.87896900 | C  | -1.53905900 | 5.82301400  | 0.94202700  |
| H  | -6.21318600 | 0.46328100  | -3.81844500 | C  | -2.92123400 | 4.53372300  | 2.52553900  |
| H  | -5.82647300 | -0.34487200 | 0.44978900  | H  | -4.09877600 | 3.30154500  | 3.82315700  |
| C  | -1.52608700 | -2.06389500 | -1.53498200 | C  | -0.67887400 | 5.88177100  | -0.12916300 |
| H  | -1.84158600 | -2.30354000 | -0.51595600 | H  | 0.41357600  | 4.72849400  | -1.60440400 |
| C  | -1.98765400 | -3.23469500 | -2.41998700 | H  | -1.87510900 | 6.73379500  | 1.43085200  |
| H  | -1.51300700 | -4.17659600 | -2.13905800 | H  | -3.23127200 | 5.46920400  | 2.98410800  |
| H  | -3.06880100 | -3.35527800 | -2.29254200 | H  | -0.32488100 | 6.84004900  | -0.49780800 |
| H  | -1.80055800 | -3.07013800 | -3.48152700 | C  | -2.25798700 | -0.77784400 | 1.85596700  |
| P  | 0.35417100  | -1.81097100 | -1.20856900 | C  | -1.61856000 | -0.96122400 | 3.13686700  |
| C  | 1.30149200  | -1.59387200 | -2.87819000 | C  | -3.30822700 | -1.60215000 | 1.49346400  |
| C  | 0.91722200  | -3.43258000 | -0.30385100 | C  | -0.55241300 | -0.14902100 | 3.61542800  |
| C  | 1.21472500  | -4.63965600 | -1.21706900 | C  | -2.09499400 | -2.01643700 | 3.99067500  |
| H  | 1.47448600  | -5.49614300 | -0.58185100 | C  | -3.77300400 | -2.63186100 | 2.34489200  |
| H  | 0.35721800  | -4.94024200 | -1.82396300 | H  | -3.78470000 | -1.45502700 | 0.53322500  |
| H  | 2.06266800  | -4.46761600 | -1.88401900 | C  | 0.02258300  | -0.38171000 | 4.84841800  |
| C  | -0.18516600 | -3.83912800 | 0.70010700  | H  | -0.18106600 | 0.68020500  | 3.02409300  |
| H  | -0.47601900 | -3.01706900 | 1.36167300  | C  | -1.48127600 | -2.22389600 | 5.25515000  |
| H  | -1.08378800 | -4.22418800 | 0.20979500  | C  | -3.17428100 | -2.83636300 | 3.56445700  |
| H  | 0.20439200  | -4.64451000 | 1.33468900  | H  | -4.60419000 | -3.25515000 | 2.02733700  |
| C  | 2.18942300  | -3.11480400 | 0.51421500  | C  | -0.44066900 | -1.42849200 | 5.67769500  |
| H  | 2.49209900  | -4.01948300 | 1.05699200  | H  | 0.83307300  | 0.25819000  | 5.18545200  |
| H  | 3.03099700  | -2.80537800 | -0.10873400 | H  | -1.85591400 | -3.02529500 | 5.88692600  |
| H  | 2.01462200  | -2.32860100 | 1.25686500  | H  | -3.52073200 | -3.62718800 | 4.22498800  |
| C  | 0.87895900  | -2.59814900 | -3.97370500 | H  | 0.01835400  | -1.59559800 | 6.64768600  |
| H  | 1.58536800  | -2.51586500 | -4.80915300 | Rh | 0.71887500  | -0.01230300 | 0.26775200  |
| H  | 0.88412400  | -3.63804200 | -3.64386800 | H  | 2.40017600  | -0.07424400 | 0.04303300  |
| H  | -0.11147100 | -2.36635800 | -4.37173400 | H  | 0.70227700  | 0.85216100  | -0.97090000 |
| C  | 1.03844500  | -0.17212500 | -3.42584100 | C  | 6.95520600  | -2.54781200 | 1.27151400  |
| H  | 1.48494400  | -0.09947500 | -4.42601300 | C  | 5.76899900  | -1.96348400 | 1.70158700  |
|    |             |             |             | C  | 5.29363300  | -0.83863300 | 1.02651100  |



|   |            |             |             |   |             |             |             |
|---|------------|-------------|-------------|---|-------------|-------------|-------------|
| C | 5.98892900 | -0.28420700 | -0.06223400 | H | 1.48479000  | -3.72367500 | -2.91344300 |
| C | 7.18909300 | -0.89077400 | -0.47706300 | H | 3.11850500  | -3.34340200 | -2.37579300 |
| C | 7.66409000 | -2.01573400 | 0.18164200  | H | 2.11202700  | -4.44186000 | -1.42956100 |
| H | 7.33654200 | -3.42275800 | 1.78921700  | P | -0.17408900 | -2.27328900 | -0.53204300 |
| H | 5.21179500 | -2.34979000 | 2.54829600  | C | -0.33658200 | -3.56479100 | 0.88943600  |
| C | 5.44010900 | 0.91231100  | -0.66947800 | C | -1.30638500 | -2.70569800 | -2.03243300 |
| H | 7.73036200 | -0.45950400 | -1.31165100 | C | -1.31788900 | -4.20619700 | -2.40019600 |
| H | 8.58997600 | -2.48154000 | -0.14040000 | H | -1.90870300 | -4.33496500 | -3.31569000 |
| C | 4.22970400 | 1.39389600  | -0.22933600 | H | -0.32520900 | -4.61527200 | -2.59551700 |
| C | 3.51551700 | 0.72453400  | 0.81035800  | H | -1.79055000 | -4.81725300 | -1.62708000 |
| H | 3.78380600 | 2.28064100  | -0.66588900 | C | -0.81921800 | -1.88126000 | -3.24721200 |
| O | 6.17648100 | 1.48186800  | -1.61759000 | H | 0.14250300  | -2.22138100 | -3.63965700 |
| O | 4.13426800 | -0.27478300 | 1.49422700  | H | -1.55217900 | -1.98634800 | -4.05617700 |
| C | 2.60949100 | 1.56569000  | 1.75661100  | H | -0.73922200 | -0.81333600 | -3.01545800 |
| O | 1.32881100 | 1.46309800  | 1.59042500  | C | -2.75946000 | -2.27036000 | -1.74265600 |
| O | 3.20298300 | 2.25234200  | 2.56470800  | H | -3.37592200 | -2.52584100 | -2.61376700 |
| C | 5.16922300 | 4.29237300  | -3.69700500 | H | -3.19274200 | -2.77368800 | -0.87621100 |
| H | 4.54066200 | 5.17721200  | -3.84321800 | H | -2.83576900 | -1.19249900 | -1.58303000 |
| H | 4.79011900 | 3.47897700  | -4.31774700 | C | 0.41056100  | -4.88827100 | 0.63808600  |
| H | 6.20072500 | 4.51852100  | -3.99015200 | H | 1.49282200  | -4.74368900 | 0.60152600  |
| O | 5.09399800 | 3.83590300  | -2.33551100 | H | 0.20459600  | -5.57139000 | 1.47199900  |
| H | 5.76849800 | 2.33830700  | -1.92587000 | H | 0.09164400  | -5.38897400 | -0.27951700 |
| H | 5.42887800 | 4.53534600  | -1.75143700 | C | 0.24659600  | -2.89681100 | 2.15705200  |

## TS2-conf2

|    |            |             |             |   |             |             |             |
|----|------------|-------------|-------------|---|-------------|-------------|-------------|
| Fe | 4.60382500 | -1.14651700 | -0.39368100 | H | 1.29736600  | -2.61912800 | 2.04774500  |
| C  | 2.61205700 | -1.85499900 | -0.20861300 | H | -0.32882900 | -2.00482200 | 2.44242600  |
| C  | 6.38790700 | -0.08437600 | -0.54126300 | C | -1.82368100 | -3.86876500 | 1.17211200  |
| C  | 3.53707600 | -2.68114000 | 0.50380000  | H | -2.40596400 | -2.95906700 | 1.34674000  |
| H  | 3.73100900 | -3.72766600 | 0.31108100  | H | -2.29942200 | -4.44105400 | 0.37217600  |
| C  | 2.72908600 | -0.51548400 | 0.32452900  | H | -1.88210000 | -4.47755500 | 2.08314000  |
| C  | 5.29370100 | -0.99197300 | -2.36121400 | P | 1.45948100  | 0.78035400  | 0.15370800  |
| H  | 4.69801700 | -1.09738300 | -3.25880200 | C | 1.99781800  | 2.09968600  | 1.32158300  |
| C  | 3.71911500 | -0.55234100 | 1.37145000  | C | 1.84470100  | 1.96229100  | 2.74536400  |
| H  | 4.03692200 | 0.29294800  | 1.96397600  | C | 2.57590100  | 3.24721300  | 0.79989700  |
| C  | 6.64318100 | -1.48849000 | -0.55617300 | C | 1.30862400  | 0.81103300  | 3.38118300  |
| H  | 7.21723500 | -2.03780800 | 0.17829400  | C | 2.27910900  | 3.04441900  | 3.58506300  |
| C  | 5.55777600 | 0.22317200  | -1.65679400 | C | 3.00789000  | 4.30063500  | 1.63599500  |
| H  | 5.18145200 | 1.20482900  | -1.90991300 | H | 2.70147200  | 3.35394500  | -0.27197000 |
| C  | 4.19924400 | -1.88528300 | 1.48587600  | C | 1.18813200  | 0.73395400  | 4.75086800  |
| H  | 4.97594500 | -2.22333000 | 2.15891700  | H | 0.99352400  | -0.03242400 | 2.77672000  |
| C  | 5.96766900 | -2.04926200 | -1.67985200 | C | 2.13631000  | 2.93797900  | 4.99514500  |
| H  | 5.95182800 | -3.09631700 | -1.95257400 | C | 2.85326400  | 4.20252000  | 2.99838600  |
| H  | 6.73795600 | 0.61850900  | 0.20300400  | H | 3.45483000  | 5.18487600  | 1.19177500  |
| C  | 1.61446900 | -2.29266900 | -1.25250800 | C | 1.60072000  | 1.80978200  | 5.57068200  |
| H  | 1.52194900 | -1.47659200 | -1.97700900 | H | 0.76885300  | -0.15849400 | 5.20664300  |
| C  | 2.09614700 | -3.53181700 | -2.03095700 | H | 2.46364500  | 3.77027800  | 5.61272500  |
|    |            |             |             | H | 3.17358200  | 5.01199800  | 3.64929700  |

|    |             |             |             |
|----|-------------|-------------|-------------|
| H  | 1.49482300  | 1.74010500  | 6.64903500  |
| C  | 1.46057300  | 1.55185200  | -1.52559100 |
| C  | 0.51009200  | 2.58401600  | -1.86722700 |
| C  | 2.30428200  | 1.05536800  | -2.50149800 |
| C  | -0.39792700 | 3.16685100  | -0.93858600 |
| C  | 0.48531600  | 3.06432800  | -3.22241600 |
| C  | 2.26678600  | 1.53292300  | -3.83388600 |
| H  | 3.01845800  | 0.28537500  | -2.23900200 |
| C  | -1.26634000 | 4.16974200  | -1.32329400 |
| H  | -0.41877100 | 2.83472100  | 0.09265600  |
| C  | -0.42549900 | 4.09222300  | -3.58621100 |
| C  | 1.37529000  | 2.51539700  | -4.18596600 |
| H  | 2.95017700  | 1.11920500  | -4.56989700 |
| C  | -1.28237800 | 4.64314500  | -2.65789100 |
| H  | -1.92519600 | 4.61437700  | -0.58190300 |
| H  | -0.42028100 | 4.45007000  | -4.61254200 |
| H  | 1.33910400  | 2.89168600  | -5.20500700 |
| H  | -1.94526400 | 5.45696900  | -2.94092300 |
| Rh | -0.67859000 | -0.21994600 | 0.47179500  |
| H  | -1.05475600 | 0.25810000  | -0.91785300 |
| H  | -2.34552700 | -0.59874700 | 0.63941700  |
| C  | -7.17437200 | -2.64336500 | 1.55564900  |
| C  | -5.99142400 | -2.10560900 | 2.05138400  |
| C  | -5.36254300 | -1.09067300 | 1.32998600  |
| C  | -5.90019700 | -0.60237400 | 0.12498600  |
| C  | -7.09772900 | -1.16191900 | -0.35656400 |
| C  | -7.72684800 | -2.17587000 | 0.35200600  |
| H  | -7.67506300 | -3.43098100 | 2.11057200  |
| H  | -5.55354600 | -2.44286400 | 2.98479500  |
| C  | -5.19265800 | 0.47588700  | -0.53733800 |
| H  | -7.51474300 | -0.78283500 | -1.28292000 |
| H  | -8.65152500 | -2.60445700 | -0.02115300 |
| C  | -4.00497300 | 0.91662800  | -0.00803500 |
| C  | -3.44605800 | 0.30310400  | 1.15802900  |
| H  | -3.43978800 | 1.71425100  | -0.47467700 |
| O  | -5.75552400 | 0.97913300  | -1.63012100 |
| O  | -4.21170300 | -0.56892900 | 1.86637500  |
| C  | -2.56509300 | 1.20931000  | 2.06311500  |
| O  | -3.08356800 | 1.72436400  | 3.02926900  |
| O  | -1.34657800 | 1.37148100  | 1.62522200  |
| C  | -5.09611000 | 4.32982000  | -2.43596800 |
| H  | -4.80455300 | 4.84132900  | -1.51068700 |
| H  | -4.92699800 | 4.99144900  | -3.29306900 |
| H  | -6.15853700 | 4.08523400  | -2.38465600 |
| O  | -4.39763200 | 3.08867100  | -2.60018600 |
| H  | -3.44040800 | 3.25694500  | -2.62585300 |
| H  | -5.19616800 | 1.71010600  | -2.01252600 |

### TS2-conf3

|    |             |             |             |
|----|-------------|-------------|-------------|
| Fe | -4.17616100 | -1.86879800 | 0.39727700  |
| C  | -2.12853300 | -2.30678300 | 0.12041600  |
| C  | -5.16831200 | -0.63301900 | 1.76716600  |
| C  | -2.96588400 | -3.28383600 | -0.50579400 |
| H  | -3.00364100 | -4.33627400 | -0.25981400 |
| C  | -2.45410200 | -1.02175800 | -0.46163900 |
| C  | -5.38181700 | -2.93004400 | 1.71481300  |
| H  | -5.26055300 | -3.98154200 | 1.93991100  |
| C  | -3.47993600 | -1.24590600 | -1.44951100 |
| H  | -3.94019200 | -0.48094400 | -2.05773600 |
| C  | -6.03085800 | -0.96699400 | 0.68379700  |
| H  | -6.47557000 | -0.26702600 | -0.01068600 |
| C  | -4.76088300 | -1.84479900 | 2.40340000  |
| H  | -4.10508300 | -1.92931100 | 3.26046400  |
| C  | -3.78140900 | -2.63352200 | -1.47828500 |
| H  | -4.53895400 | -3.10485400 | -2.09022300 |
| C  | -6.16617100 | -2.38733700 | 0.65402200  |
| H  | -6.73255100 | -2.95667600 | -0.07109400 |
| H  | -4.86876300 | 0.36602200  | 2.05012000  |
| C  | -1.03253900 | -2.57343200 | 1.12265100  |
| H  | -1.02549400 | -1.74303100 | 1.83643500  |
| C  | -1.29167500 | -3.86185900 | 1.92766700  |
| H  | -0.63412700 | -3.94182700 | 2.79374300  |
| H  | -2.32110800 | -3.83387100 | 2.30025400  |
| H  | -1.17786200 | -4.77081100 | 1.33486900  |
| P  | 0.69840900  | -2.31699400 | 0.32349800  |
| C  | 0.96113800  | -3.55605000 | -1.12838000 |
| C  | 1.94685600  | -2.59929400 | 1.76558900  |
| C  | 2.16874400  | -4.08806000 | 2.11376300  |
| H  | 2.80915600  | -4.14570800 | 3.00275400  |
| H  | 1.24733500  | -4.62574900 | 2.34245600  |
| H  | 2.68465600  | -4.62452200 | 1.31323200  |
| C  | 1.41394300  | -1.84574700 | 3.00705000  |
| H  | 0.52361400  | -2.30646300 | 3.44215200  |
| H  | 2.19172200  | -1.85564100 | 3.78013400  |
| H  | 1.18753100  | -0.79683700 | 2.78512700  |
| C  | 3.31670900  | -1.97799900 | 1.41708200  |
| H  | 4.00276900  | -2.16873400 | 2.25200100  |
| H  | 3.76689800  | -2.40712600 | 0.51990000  |
| H  | 3.24770200  | -0.89624200 | 1.28352600  |
| C  | 0.41112800  | -4.97202200 | -0.87215300 |
| H  | 0.84596900  | -5.44149700 | 0.01416600  |
| H  | -0.67706500 | -4.97631400 | -0.77478600 |
| H  | 0.66005200  | -5.60584300 | -1.73287100 |
| C  | 0.23097100  | -2.94920200 | -2.35164200 |

|    |             |             |             |
|----|-------------|-------------|-------------|
| H  | 0.37299800  | -3.61028400 | -3.21616300 |
| H  | -0.84301700 | -2.83373700 | -2.19263200 |
| H  | 0.65084000  | -1.97214000 | -2.63671600 |
| C  | 2.46065100  | -3.65421600 | -1.48387400 |
| H  | 2.91026400  | -2.67318300 | -1.66524900 |
| H  | 3.04412600  | -4.17006600 | -0.71734400 |
| H  | 2.55662800  | -4.23637600 | -2.40887900 |
| P  | -1.37355100 | 0.44755400  | -0.44956000 |
| C  | -2.10799600 | 1.53522000  | -1.74885200 |
| C  | -3.32190900 | 2.29783800  | -1.58093900 |
| C  | -1.45916900 | 1.54253700  | -2.97461900 |
| C  | -4.09233400 | 2.33614800  | -0.38692300 |
| C  | -3.79980200 | 3.06449400  | -2.70121600 |
| C  | -1.94722000 | 2.29159100  | -4.06898400 |
| H  | -0.53036600 | 1.00212700  | -3.09898200 |
| C  | -5.24362000 | 3.09012600  | -0.29508400 |
| H  | -3.76877300 | 1.76656300  | 0.47287400  |
| C  | -4.98899500 | 3.83151700  | -2.57246900 |
| C  | -3.08926800 | 3.04082600  | -3.93079700 |
| H  | -1.40200600 | 2.27600800  | -5.00757900 |
| C  | -5.70036900 | 3.84999500  | -1.39538100 |
| H  | -5.80377100 | 3.10354600  | 0.63604500  |
| H  | -5.32787100 | 4.40554300  | -3.43105100 |
| H  | -3.46941200 | 3.62857000  | -4.76252800 |
| H  | -6.60695500 | 4.44147900  | -1.30913000 |
| C  | -1.40183800 | 1.33444200  | 1.17433400  |
| C  | -0.68815600 | 2.57605500  | 1.34266000  |
| C  | -2.01349400 | 0.74716800  | 2.26759000  |
| C  | 0.00734900  | 3.24081000  | 0.29283400  |
| C  | -0.66659100 | 3.17731000  | 2.64862700  |
| C  | -1.97906200 | 1.34508900  | 3.54972100  |
| H  | -2.55829000 | -0.18041200 | 2.13758400  |
| C  | 0.67066100  | 4.43060400  | 0.51500200  |
| H  | 0.03506300  | 2.81415200  | -0.70215000 |
| C  | 0.02095000  | 4.40672700  | 2.84245200  |
| C  | -1.32458600 | 2.53842500  | 3.73401500  |
| H  | -2.47978000 | 0.85716500  | 4.38111900  |
| C  | 0.67619400  | 5.02763000  | 1.79972900  |
| H  | 1.18124600  | 4.91926300  | -0.31005300 |
| H  | 0.00515000  | 4.85862200  | 3.83131300  |
| H  | -1.29936500 | 3.01048900  | 4.71282900  |
| H  | 1.17305400  | 5.98206800  | 1.95354200  |
| Rh | 0.90033800  | -0.25066300 | -0.73483400 |
| H  | 1.17998900  | 0.33530300  | 0.63738700  |
| H  | 2.62383200  | -0.36769200 | -0.85124600 |
| C  | 7.88666700  | -1.43755700 | -1.34341400 |
| C  | 6.63667100  | -1.23249900 | -1.91802700 |

|   |            |             |             |
|---|------------|-------------|-------------|
| C | 5.76490500 | -0.32304100 | -1.31943400 |
| C | 6.12293600 | 0.38395200  | -0.15700300 |
| C | 7.39129200 | 0.15815800  | 0.40727900  |
| C | 8.26462500 | -0.74603000 | -0.18113100 |
| H | 8.57629800 | -2.13812000 | -1.80446000 |
| H | 6.32887300 | -1.74602100 | -2.82260700 |
| C | 5.15463800 | 1.31642600  | 0.38663700  |
| H | 7.66857800 | 0.70480800  | 1.30169400  |
| H | 9.24405800 | -0.91542200 | 0.25474200  |
| C | 3.93052000 | 1.43615100  | -0.22120600 |
| C | 3.58477800 | 0.63303200  | -1.35765400 |
| H | 3.17180200 | 2.11086000  | 0.15635300  |
| O | 5.52927200 | 2.01958000  | 1.45043800  |
| O | 4.55413600 | -0.12665500 | -1.93625000 |
| C | 2.63703400 | 1.28985500  | -2.39935700 |
| O | 3.11195100 | 1.75619400  | -3.41029400 |
| O | 1.38767700 | 1.31645400  | -2.01532000 |
| C | 3.60878900 | 3.45658800  | 4.04161100  |
| H | 2.69202300 | 3.30992000  | 4.62368900  |
| H | 4.37812700 | 2.77779100  | 4.41466500  |
| H | 3.95791900 | 4.48962300  | 4.16033700  |
| O | 3.39885900 | 3.12320100  | 2.66432200  |
| H | 2.69768600 | 3.69344200  | 2.30328200  |
| H | 4.76187000 | 2.54066500  | 1.81457600  |

#### TS2-conf4

|    |             |             |             |
|----|-------------|-------------|-------------|
| Fe | -4.25120000 | -1.80178000 | 0.31992700  |
| C  | -2.21010200 | -2.28049000 | 0.06618900  |
| C  | -6.08672500 | -0.86130100 | 0.60577700  |
| C  | -3.05845400 | -3.21634300 | -0.60651900 |
| H  | -3.12612800 | -4.27480700 | -0.39524500 |
| C  | -2.49364800 | -0.97005900 | -0.47999800 |
| C  | -4.87255700 | -1.83338400 | 2.31493400  |
| H  | -4.23535100 | -1.96568000 | 3.17994000  |
| C  | -3.50568900 | -1.13726700 | -1.49293200 |
| H  | -3.93607600 | -0.34221000 | -2.08418300 |
| C  | -6.25852800 | -2.27555900 | 0.52246300  |
| H  | -6.82592700 | -2.80342000 | -0.23262600 |
| C  | -5.23613300 | -0.58932300 | 1.71565900  |
| H  | -4.91615000 | 0.39052800  | 2.04027400  |
| C  | -3.83970600 | -2.51551600 | -1.57202600 |
| H  | -4.59674300 | -2.94844000 | -2.21230800 |
| C  | -5.50852400 | -2.87647000 | 1.57675000  |
| H  | -5.41882100 | -3.93817400 | 1.76588200  |
| H  | -6.50000300 | -0.12534400 | -0.07067700 |
| C  | -1.14112100 | -2.60494700 | 1.08022400  |
| H  | -1.12944700 | -1.79830700 | 1.82040900  |

|   |             |             |             |    |             |             |             |
|---|-------------|-------------|-------------|----|-------------|-------------|-------------|
| C | -1.44569000 | -3.91185300 | 1.83815400  | H  | -3.33752000 | 3.84403600  | -4.62970600 |
| H | -0.80923600 | -4.03311600 | 2.71506900  | H  | -6.51332100 | 4.60424600  | -1.19882000 |
| H | -2.48219400 | -3.87277200 | 2.18946700  | C  | -1.41168300 | 1.29611400  | 1.25775500  |
| H | -1.33826700 | -4.80413100 | 1.21953900  | C  | -0.66786400 | 2.51059000  | 1.48371500  |
| P | 0.61098100  | -2.36398800 | 0.32512200  | C  | -2.04950700 | 0.68093100  | 2.32028500  |
| C | 0.87320700  | -3.56171400 | -1.16109500 | C  | 0.04484900  | 3.20573300  | 0.46597700  |
| C | 1.82125000  | -2.72332800 | 1.78241400  | C  | -0.63631500 | 3.05193900  | 2.81567500  |
| C | 2.00031300  | -4.22748000 | 2.08738900  | C  | -2.00546900 | 1.21983000  | 3.62816100  |
| H | 2.62009900  | -4.32814100 | 2.98708600  | H  | -2.62023100 | -0.22360000 | 2.14660400  |
| H | 1.06205500  | -4.74983800 | 2.28016800  | C  | 0.72773700  | 4.37282300  | 0.74207100  |
| H | 2.52056100  | -4.75109800 | 1.28115600  | H  | 0.06614200  | 2.82320300  | -0.54694200 |
| C | 1.28060200  | -1.99638300 | 3.03636000  | C  | 0.07823600  | 4.25444300  | 3.06661700  |
| H | 0.37018900  | -2.44806000 | 3.43800300  | C  | -1.31563000 | 2.38257700  | 3.86931200  |
| H | 2.04109700  | -2.04972100 | 3.82464300  | H  | -2.52522400 | 0.71020200  | 4.43445500  |
| H | 1.08384300  | -0.93579000 | 2.84354700  | C  | 0.74290200  | 4.91035600  | 2.05250100  |
| C | 3.21317700  | -2.12633000 | 1.48235900  | H  | 1.24414800  | 4.89042100  | -0.06171000 |
| H | 3.87566300  | -2.35785500 | 2.32586600  | H  | 0.07720500  | 4.65700300  | 4.07634700  |
| H | 3.67262700  | -2.54049600 | 0.58288100  | H  | -1.27909900 | 2.80789100  | 4.86884400  |
| H | 3.17360600  | -1.03973000 | 1.37866800  | H  | 1.25294800  | 5.84983000  | 2.25031900  |
| C | 0.28133700  | -4.97012500 | -0.96296100 | Rh | 0.88437500  | -0.27166800 | -0.66771000 |
| H | -0.80837700 | -4.94857000 | -0.88806700 | H  | 1.15885500  | 0.27239600  | 0.72293400  |
| H | 0.53208100  | -5.58205400 | -1.83885300 | H  | 2.59916700  | -0.43341500 | -0.74672500 |
| H | 0.68501700  | -5.47943000 | -0.08393000 | C  | 7.71973000  | -1.89132300 | -1.18127700 |
| C | 0.18481300  | -2.89666900 | -2.37831200 | C  | 6.50693600  | -1.57163600 | -1.78265700 |
| H | 0.32624800  | -3.53394600 | -3.26063200 | C  | 5.70230900  | -0.59715900 | -1.19216700 |
| H | -0.88861700 | -2.75649100 | -2.23639400 | C  | 6.09273100  | 0.06441000  | -0.01347000 |
| H | 0.63685300  | -1.92333200 | -2.62448100 | C  | 7.32348400  | -0.27573300 | 0.57647100  |
| C | 2.37669100  | -3.68872400 | -1.48905300 | C  | 8.12799800  | -1.24776100 | -0.00175700 |
| H | 2.85506100  | -2.71514100 | -1.63229700 | H  | 8.35665400  | -2.64483000 | -1.63461300 |
| H | 2.93053800  | -4.24201500 | -0.72665000 | H  | 6.17808300  | -2.04670700 | -2.70075100 |
| H | 2.47679100  | -4.24591800 | -2.42891500 | C  | 5.20451800  | 1.08457000  | 0.50938300  |
| P | -1.37978600 | 0.47184500  | -0.39829400 | H  | 7.62678800  | 0.23731800  | 1.48229900  |
| C | -2.06757800 | 1.62234500  | -1.66854400 | H  | 9.07794900  | -1.50674500 | 0.45482600  |
| C | -3.26796000 | 2.40431400  | -1.49333300 | C  | 4.00274700  | 1.30641700  | -0.11580800 |
| C | -1.39701100 | 1.65983100  | -2.88206300 | C  | 3.60659600  | 0.52630900  | -1.25113500 |
| C | -4.05479200 | 2.42002900  | -0.30957200 | H  | 3.30821300  | 2.05578900  | 0.24429100  |
| C | -3.71264900 | 3.21755000  | -2.59422200 | O  | 5.62692400  | 1.75634000  | 1.57468100  |
| C | -1.85191700 | 2.45596500  | -3.95741800 | O  | 4.52705300  | -0.29092300 | -1.83239400 |
| H | -0.47645100 | 1.10599400  | -3.00967400 | C  | 2.69043400  | 1.23697700  | -2.28463900 |
| C | -5.19200200 | 3.19405700  | -0.20961900 | O  | 3.18897600  | 1.69801700  | -3.28713700 |
| H | -3.75435700 | 1.81760800  | 0.53617900  | O  | 1.44207700  | 1.31040100  | -1.90426300 |
| C | -4.88851200 | 4.00357100  | -2.45779200 | C  | 4.52418000  | 5.05947300  | 1.88312400  |
| C | -2.98230700 | 3.22147200  | -3.81239900 | H  | 4.15232900  | 5.42169500  | 0.91720500  |
| H | -1.29119900 | 2.46207800  | -4.88696700 | H  | 4.30162100  | 5.79537700  | 2.66419300  |
| C | -5.61728800 | 3.99779600  | -1.29124500 | H  | 5.60611800  | 4.93025900  | 1.81939500  |
| H | -5.76521600 | 3.18951000  | 0.71360400  | O  | 3.97755200  | 3.77671600  | 2.21472500  |
| H | -5.20278500 | 4.61227900  | -3.30172600 | H  | 3.00774500  | 3.83805000  | 2.25315600  |

|                   |             |             |             |    |             |             |             |
|-------------------|-------------|-------------|-------------|----|-------------|-------------|-------------|
| H                 | 4.95769000  | 2.44142700  | 1.85097400  | H  | 1.00238200  | 0.17631000  | -4.19601900 |
| <b>TS2'-conf2</b> |             |             |             | H  | -0.45022200 | 0.10738000  | -3.18951700 |
| Fe                | -4.42258800 | -0.63611800 | -1.54684000 | H  | 1.10464700  | 0.62719600  | -2.49283400 |
| C                 | -2.35184200 | -1.09833800 | -1.66309800 | C  | 2.53547500  | -1.63840400 | -2.87206200 |
| C                 | -5.88238400 | -2.05465400 | -1.97728900 | H  | 2.90028400  | -1.27631800 | -3.84192500 |
| C                 | -2.92646800 | -0.88856000 | -2.95623700 | H  | 2.99257800  | -1.01954900 | -2.09407500 |
| H                 | -2.98291200 | -1.61964400 | -3.75158800 | H  | 2.89391800  | -2.66411800 | -2.75756000 |
| C                 | -2.55745700 | 0.10885200  | -0.89510000 | P  | -1.59267700 | 0.55167500  | 0.59043400  |
| C                 | -6.34397900 | 0.03702300  | -1.11377200 | C  | -2.02584400 | 2.31667200  | 0.89977500  |
| H                 | -6.61693400 | 1.08116200  | -1.03753400 | C  | -1.52652300 | 3.37490700  | 0.06300400  |
| C                 | -3.24709000 | 1.04724300  | -1.74320800 | C  | -2.85012600 | 2.62138000  | 1.97127500  |
| H                 | -3.55119400 | 2.04384400  | -1.45863800 | C  | -0.71363100 | 3.16650600  | -1.08374600 |
| C                 | -5.58868600 | -2.07904600 | -0.58116900 | C  | -1.88842100 | 4.72765800  | 0.38301900  |
| H                 | -5.21936900 | -2.93261700 | -0.02755900 | C  | -3.20404300 | 3.95557100  | 2.27399300  |
| C                 | -6.34887900 | -0.74767900 | -2.30601500 | H  | -3.23260400 | 1.82852800  | 2.60433400  |
| H                 | -6.62205000 | -0.40099700 | -3.29394800 | C  | -0.27371100 | 4.21733700  | -1.85796800 |
| C                 | -3.45540100 | 0.43633300  | -3.01061600 | H  | -0.44614300 | 2.15414800  | -1.36910200 |
| H                 | -3.98006600 | 0.87702700  | -3.84797500 | C  | -1.41167100 | 5.79187900  | -0.42953400 |
| C                 | -5.87795600 | -0.78494600 | -0.04842200 | C  | -2.72559600 | 4.98558800  | 1.50049800  |
| H                 | -5.74817900 | -0.47228800 | 0.97851200  | H  | -3.84918200 | 4.15548800  | 3.12413700  |
| H                 | -5.75244800 | -2.87500500 | -2.67096000 | C  | -0.62045800 | 5.54795100  | -1.52765500 |
| C                 | -1.57160200 | -2.29862100 | -1.18788000 | H  | 0.34206300  | 4.02319100  | -2.73207200 |
| H                 | -1.77761600 | -2.41370700 | -0.11847700 | H  | -1.69163600 | 6.80866300  | -0.16658300 |
| C                 | -2.02679300 | -3.60028200 | -1.87389500 | H  | -2.98497400 | 6.01568000  | 1.73099100  |
| H                 | -3.11737300 | -3.66432100 | -1.79596500 | H  | -0.26615000 | 6.36969300  | -2.14291100 |
| H                 | -1.76765400 | -3.64679600 | -2.93250300 | C  | -2.13894700 | -0.38977400 | 2.07838700  |
| H                 | -1.61284500 | -4.48444500 | -1.38765300 | C  | -1.48011100 | -0.21026300 | 3.34945200  |
| P                 | 0.31011500  | -1.88531800 | -1.09811800 | C  | -3.12596100 | -1.35038400 | 1.94871300  |
| C                 | 0.99523300  | -1.53754700 | -2.86597400 | C  | -0.45038200 | 0.74307000  | 3.58471200  |
| C                 | 1.11228800  | -3.45363900 | -0.31263300 | C  | -1.89478600 | -1.03753900 | 4.45044900  |
| C                 | 1.27074500  | -4.63784300 | -1.29186000 | C  | -3.51982600 | -2.16275400 | 3.03775500  |
| H                 | 1.63990600  | -5.50560100 | -0.73100000 | H  | -3.61534800 | -1.47833600 | 0.99227300  |
| H                 | 0.33632000  | -4.93564500 | -1.77051900 | C  | 0.13367900  | 0.86708700  | 4.82859800  |
| H                 | 2.00272000  | -4.43056200 | -2.07679500 | H  | -0.10438600 | 1.38823700  | 2.78568200  |
| C                 | 0.22983600  | -3.88696200 | 0.88189100  | C  | -1.27403200 | -0.87818600 | 5.71851000  |
| H                 | -0.73197400 | -4.30614700 | 0.57525400  | C  | -2.91710800 | -2.00598200 | 4.26205300  |
| H                 | 0.75866600  | -4.66946500 | 1.43936600  | H  | -4.30259800 | -2.90308600 | 2.89853600  |
| H                 | 0.04148700  | -3.06162500 | 1.57716100  | C  | -0.27934100 | 0.05343100  | 5.90824000  |
| C                 | 2.50632200  | -3.10877500 | 0.25573600  | H  | 0.91753100  | 1.60450500  | 4.97607900  |
| H                 | 2.93169100  | -4.01740300 | 0.70026500  | H  | -1.60440000 | -1.50951100 | 6.53951200  |
| H                 | 3.20505100  | -2.76015400 | -0.50747400 | H  | -3.21391100 | -2.62170400 | 5.10738900  |
| H                 | 2.44827400  | -2.34757900 | 1.03635500  | H  | 0.18659400  | 0.16755600  | 6.88268100  |
| C                 | 0.42738000  | -2.44878200 | -3.97092700 | Rh | 0.70376200  | 0.07797900  | 0.11747300  |
| H                 | 0.59093600  | -3.51093600 | -3.77215900 | H  | 0.76244300  | -0.78777800 | 1.36008100  |
| H                 | -0.64088700 | -2.28175800 | -4.12709800 | H  | 2.39227300  | -0.10059200 | 0.01214000  |
| H                 | 0.93186200  | -2.21162200 | -4.91655400 | C  | 6.62404500  | -2.41811000 | 2.26994300  |
| C                 | 0.62730100  | -0.07137900 | -3.19427400 | C  | 5.45896600  | -1.67308600 | 2.41462200  |

|                   |             |             |             |   |             |             |             |
|-------------------|-------------|-------------|-------------|---|-------------|-------------|-------------|
| C                 | 5.13231800  | -0.74339800 | 1.42693300  | H | -2.45872700 | -4.20357000 | 1.40916300  |
| C                 | 5.95476800  | -0.54023700 | 0.30525000  | H | -1.08171900 | -4.87677700 | 0.53445400  |
| C                 | 7.13085500  | -1.30334000 | 0.18235900  | H | -0.88670000 | -4.31330400 | 2.19485100  |
| C                 | 7.45852100  | -2.23759000 | 1.15430700  | P | 0.71568000  | -2.15566900 | 0.36861200  |
| H                 | 6.89014100  | -3.14423100 | 3.03213100  | C | 1.35577100  | -3.09456100 | -1.18753800 |
| H                 | 4.80537400  | -1.78804800 | 3.27271000  | C | 1.69464500  | -2.62424400 | 1.96089500  |
| C                 | 5.55816700  | 0.48531900  | -0.63911300 | C | 1.99195900  | -4.13450900 | 2.09195600  |
| H                 | 7.77061700  | -1.14142200 | -0.67789400 | H | 1.10028900  | -4.76115600 | 2.04069600  |
| H                 | 8.36599400  | -2.82496800 | 1.05716500  | H | 2.69564600  | -4.48376100 | 1.33174900  |
| C                 | 4.36110800  | 1.13766900  | -0.45818200 | H | 2.46004900  | -4.31330000 | 3.06806200  |
| C                 | 3.51116600  | 0.80829100  | 0.64201900  | C | 0.86790300  | -2.14736500 | 3.17857600  |
| H                 | 4.03635300  | 1.91472400  | -1.14126700 | H | 1.48435200  | -2.25061300 | 4.07972600  |
| O                 | 6.41449600  | 0.74416400  | -1.62189200 | H | 0.58436300  | -1.09234700 | 3.09561500  |
| O                 | 3.98846700  | -0.01061500 | 1.61581800  | H | -0.03837300 | -2.73604800 | 3.34101700  |
| C                 | 2.60800200  | 1.92480400  | 1.24319500  | C | 3.03671200  | -1.86328200 | 2.00417800  |
| O                 | 1.33161600  | 1.82076300  | 1.05256400  | H | 3.56896100  | -2.15271000 | 2.91902500  |
| O                 | 3.20460300  | 2.80973500  | 1.82554700  | H | 3.68837600  | -2.09554300 | 1.15931600  |
| C                 | 5.86671100  | 3.05818700  | -4.38872000 | H | 2.88410000  | -0.78292500 | 2.03243300  |
| H                 | 6.93874800  | 3.15991000  | -4.59224700 | C | 0.89386300  | -4.55981300 | -1.29500700 |
| H                 | 5.49697100  | 2.14751600  | -4.86270700 | H | 1.35290400  | -5.00996200 | -2.18476600 |
| H                 | 5.32890200  | 3.91944300  | -4.79914500 | H | 1.19496200  | -5.16167200 | -0.43347600 |
| O                 | 5.60600200  | 2.92077900  | -2.98131500 | H | -0.18852400 | -4.63829400 | -1.41758500 |
| H                 | 6.11038800  | 1.52021400  | -2.16935700 | C | 0.81854800  | -2.30914500 | -2.40902000 |
| H                 | 5.92994300  | 3.71367000  | -2.52415800 | H | 1.17783900  | -2.78667400 | -3.33001600 |
| <b>TS2'-conf3</b> |             |             |             | H | -0.27218300 | -2.28218800 | -2.45127700 |
| Fe                | -4.10806600 | -2.03929000 | -0.46340400 | H | 1.19559700  | -1.27452100 | -2.42471500 |
| C                 | -2.00912700 | -2.27500600 | -0.38413800 | C | 2.89751900  | -3.05049200 | -1.24661100 |
| C                 | -5.06830500 | -2.49935700 | 1.33492200  | H | 3.21577600  | -3.44769200 | -2.21910500 |
| C                 | -2.60461500 | -3.14398500 | -1.35347300 | H | 3.28778800  | -2.03199900 | -1.16085300 |
| H                 | -2.57904500 | -4.22513800 | -1.33581300 | H | 3.36798200  | -3.66875600 | -0.47817700 |
| C                 | -2.34841900 | -0.91786900 | -0.75214400 | P | -1.45705800 | 0.57732400  | -0.19938300 |
| C                 | -6.04807700 | -2.71015500 | -0.74465200 | C | -2.07122900 | 1.88160600  | -1.35741800 |
| H                 | -6.40412400 | -3.13158800 | -1.67547300 | C | -3.36600000 | 2.51291600  | -1.26929000 |
| C                 | -3.13712400 | -0.98405100 | -1.95618500 | C | -1.22899300 | 2.19783900  | -2.41234600 |
| H                 | -3.55139100 | -0.13461200 | -2.47958700 | C | -4.32625600 | 2.24553000  | -0.25568400 |
| C                 | -5.46385200 | -1.19965800 | 0.89569700  | C | -3.72296300 | 3.47201800  | -2.28145300 |
| H                 | -5.32228200 | -0.27552100 | 1.43737700  | C | -1.59652200 | 3.13461100  | -3.40418100 |
| C                 | -5.43281100 | -3.43415800 | 0.31966100  | H | -0.24435900 | 1.75343900  | -2.46844500 |
| H                 | -5.25223100 | -4.50095900 | 0.33995500  | C | -5.54680700 | 2.88706900  | -0.23109800 |
| C                 | -3.28123000 | -2.34881600 | -2.32566600 | H | -4.09294100 | 1.53112800  | 0.52083300  |
| H                 | -3.85470000 | -2.72161600 | -3.16397400 | C | -4.98853200 | 4.11578700  | -2.22589900 |
| C                 | -6.06340500 | -1.32779200 | -0.39006500 | C | -2.81574000 | 3.76160200  | -3.33481100 |
| H                 | -6.43340600 | -0.51451300 | -0.99976800 | H | -0.90112700 | 3.35965400  | -4.20703500 |
| H                 | -4.58416000 | -2.73779400 | 2.27322200  | C | -5.88661200 | 3.83447300  | -1.22297900 |
| C                 | -1.09788000 | -2.67308600 | 0.74970300  | H | -6.25310300 | 2.66611700  | 0.56464800  |
| H                 | -1.30106500 | -1.99883000 | 1.58760800  | H | -5.23336400 | 4.83955900  | -2.99910100 |
| C                 | -1.38042100 | -4.10471500 | 1.24514200  | H | -3.10691600 | 4.49100600  | -4.08647300 |

|    |             |             |             |
|----|-------------|-------------|-------------|
| H  | -6.84980400 | 4.33495300  | -1.19000200 |
| C  | -1.88257700 | 1.04363600  | 1.53465800  |
| C  | -1.36837900 | 2.26279200  | 2.10503700  |
| C  | -2.62301800 | 0.17703700  | 2.32062100  |
| C  | -0.56451100 | 3.19662700  | 1.39357900  |
| C  | -1.68328900 | 2.55493800  | 3.47782500  |
| C  | -2.91074700 | 0.46745700  | 3.67463900  |
| H  | -3.02249200 | -0.73020400 | 1.88398500  |
| C  | -0.11378500 | 4.35203400  | 1.99678600  |
| H  | -0.27961800 | 3.00570100  | 0.36601900  |
| C  | -1.20764400 | 3.75856000  | 4.06378700  |
| C  | -2.45646000 | 1.63632100  | 4.23650300  |
| H  | -3.50002300 | -0.23340700 | 4.25930900  |
| C  | -0.44053300 | 4.64292500  | 3.34108300  |
| H  | 0.49982900  | 5.04499700  | 1.42837500  |
| H  | -1.46242900 | 3.96598900  | 5.10004500  |
| H  | -2.68040000 | 1.87464800  | 5.27321800  |
| H  | -0.08324300 | 5.56058200  | 3.79925900  |
| Rh | 0.90520100  | 0.09029400  | -0.25307000 |
| H  | 0.97616800  | 0.45564200  | 1.21705300  |
| H  | 2.61030700  | 0.02500500  | -0.20479000 |
| C  | 6.62446400  | 0.80464300  | 3.26252700  |
| C  | 5.43693500  | 1.24645900  | 2.68954800  |
| C  | 5.20649800  | 0.98103500  | 1.33948900  |
| C  | 6.14540800  | 0.29111100  | 0.55326600  |
| C  | 7.34165700  | -0.14273400 | 1.15407100  |
| C  | 7.57543200  | 0.10788900  | 2.49857500  |
| H  | 6.81652500  | 1.00580700  | 4.31211300  |
| H  | 4.69328700  | 1.79527000  | 3.25748800  |
| C  | 5.83881100  | 0.11134700  | -0.85202800 |
| H  | 8.07068500  | -0.66691900 | 0.54636900  |
| H  | 8.49873600  | -0.22789800 | 2.95976600  |
| C  | 4.62014600  | 0.52996500  | -1.33280800 |
| C  | 3.65719200  | 1.12868600  | -0.46246500 |
| H  | 4.36662300  | 0.42610500  | -2.38186600 |
| O  | 6.79374500  | -0.43116900 | -1.59958300 |
| O  | 4.03449900  | 1.45258800  | 0.80442000  |
| C  | 2.70178100  | 2.21070800  | -1.04604100 |
| O  | 1.43161600  | 1.95794400  | -1.00160200 |
| O  | 3.24609600  | 3.19744500  | -1.50216000 |
| C  | 6.58498300  | 1.04938500  | -4.74366700 |
| H  | 6.13623300  | 1.21946500  | -5.72764300 |
| H  | 6.25714000  | 1.83646300  | -4.06272000 |
| H  | 7.67759400  | 1.07006100  | -4.82431900 |
| O  | 6.11964100  | -0.19423300 | -4.18407600 |
| H  | 6.54227800  | -0.41977000 | -2.56579400 |
| H  | 6.37947400  | -0.91941400 | -4.77409100 |

### TS2'-conf4

|    |             |             |             |
|----|-------------|-------------|-------------|
| Fe | 4.02338600  | -2.18811100 | 0.18971400  |
| C  | 1.91712000  | -2.33099600 | 0.07270300  |
| C  | 5.30491700  | -3.51789400 | -0.76032800 |
| C  | 2.47207300  | -3.34335900 | 0.91910600  |
| H  | 2.40641400  | -4.41073300 | 0.75712600  |
| C  | 2.30394700  | -1.04876800 | 0.61920900  |
| C  | 6.00310300  | -1.54360900 | 0.21585800  |
| H  | 6.39584600  | -0.82856200 | 0.92616500  |
| C  | 3.07958400  | -1.30468300 | 1.80623200  |
| H  | 3.52083700  | -0.54901900 | 2.43970300  |
| C  | 4.98247800  | -2.44849600 | -1.64910000 |
| H  | 4.49887500  | -2.54740400 | -2.61240000 |
| C  | 5.93609200  | -2.95848900 | 0.39043600  |
| H  | 6.26893500  | -3.50791000 | 1.26116800  |
| C  | 3.16975100  | -2.71101100 | 1.99087100  |
| H  | 3.72210500  | -3.21350100 | 2.77383800  |
| C  | 5.41958100  | -1.23076900 | -1.04538600 |
| H  | 5.31579000  | -0.24057900 | -1.46529600 |
| H  | 5.08697000  | -4.56613000 | -0.91770800 |
| C  | 1.00012600  | -2.54008400 | -1.10618500 |
| H  | 1.23486400  | -1.76895600 | -1.84646600 |
| C  | 1.23140200  | -3.90327200 | -1.78630900 |
| H  | 2.30694500  | -4.02556800 | -1.95234600 |
| H  | 0.89036600  | -4.74975200 | -1.18856300 |
| H  | 0.74339200  | -3.96148900 | -2.75977200 |
| P  | -0.79553600 | -2.00962500 | -0.66402100 |
| C  | -1.47946800 | -3.12071700 | 0.75434400  |
| C  | -1.78063000 | -2.22757000 | -2.30575700 |
| C  | -2.13133800 | -3.69560100 | -2.63502100 |
| H  | -2.59798000 | -3.72752000 | -3.62752700 |
| H  | -1.26317800 | -4.35582400 | -2.66381100 |
| H  | -2.85314200 | -4.11532000 | -1.92933900 |
| C  | -0.92877600 | -1.62553500 | -3.44850200 |
| H  | -0.04308600 | -2.22046200 | -3.68503600 |
| H  | -1.54231400 | -1.58715600 | -4.35670700 |
| H  | -0.60829100 | -0.60151500 | -3.22719200 |
| C  | -3.09415200 | -1.41855000 | -2.25166000 |
| H  | -3.62884900 | -1.56431600 | -3.19869200 |
| H  | -3.76087800 | -1.73696400 | -1.44756300 |
| H  | -2.90326300 | -0.35016400 | -2.13527800 |
| C  | -1.07357200 | -4.60403300 | 0.66937400  |
| H  | -1.39333800 | -5.07632200 | -0.26329700 |
| H  | 0.00447600  | -4.73913100 | 0.78031300  |
| H  | -1.55347300 | -5.14868400 | 1.49284400  |
| C  | -0.92106800 | -2.52310600 | 2.06900700  |
| H  | -1.30243900 | -3.10419600 | 2.91887700  |

|    |             |             |             |   |             |             |             |
|----|-------------|-------------|-------------|---|-------------|-------------|-------------|
| H  | 0.16960000  | -2.54159800 | 2.11512100  | C | -6.14456700 | 0.60540200  | -0.47990200 |
| H  | -1.26040100 | -1.48645600 | 2.22031500  | C | -7.36108400 | 0.28071900  | -1.10835000 |
| C  | -3.01864300 | -3.02624800 | 0.81655600  | C | -7.60427200 | 0.69620300  | -2.40963100 |
| H  | -3.35794000 | -3.53751300 | 1.72671600  | H | -6.84146500 | 1.78112500  | -4.11616300 |
| H  | -3.36937700 | -1.99121800 | 0.86765600  | H | -4.68127900 | 2.37691800  | -3.01049600 |
| H  | -3.50690700 | -3.51783900 | -0.02838200 | C | -5.82577100 | 0.25129000  | 0.88908900  |
| P  | 1.47337700  | 0.53973300  | 0.26761000  | H | -8.09808900 | -0.29064700 | -0.55527300 |
| C  | 2.12595400  | 1.65344000  | 1.59168800  | H | -8.54338700 | 0.44473400  | -2.89208700 |
| C  | 3.44553800  | 2.23779600  | 1.59427600  | C | -4.58992300 | 0.57617000  | 1.39711100  |
| C  | 1.28640800  | 1.86086000  | 2.67543200  | C | -3.61914100 | 1.24447200  | 0.58729700  |
| C  | 4.40403300  | 2.06976700  | 0.55784400  | H | -4.32813500 | 0.34363700  | 2.42337300  |
| C  | 3.83065100  | 3.03769400  | 2.72726700  | O | -6.78769200 | -0.35049500 | 1.58071300  |
| C  | 1.68129800  | 2.64128300  | 3.78510200  | O | -4.00211400 | 1.72595400  | -0.62671500 |
| H  | 0.28411700  | 1.45390800  | 2.66746800  | C | -2.62436800 | 2.22247200  | 1.27908500  |
| C  | 5.64934800  | 2.65854800  | 0.62471400  | O | -1.36625500 | 1.91531100  | 1.22659400  |
| H  | 4.15002200  | 1.47626000  | -0.30880900 | O | -3.13019400 | 3.18573400  | 1.82070800  |
| C  | 5.12142900  | 3.63078200  | 2.76400500  | C | -6.44016100 | -1.66155200 | 4.97603600  |
| C  | 2.92540200  | 3.22109000  | 3.80581500  | H | -7.52115500 | -1.67995000 | 5.15515800  |
| H  | 0.98749300  | 2.78589700  | 4.60761600  | H | -6.15361900 | -2.55694500 | 4.42208200  |
| C  | 6.01722400  | 3.44979400  | 1.73625200  | H | -5.90660100 | -1.64567000 | 5.93228200  |
| H  | 6.35375700  | 2.51778800  | -0.19068900 | O | -6.05780400 | -0.53875300 | 4.16305500  |
| H  | 5.38742200  | 4.23399600  | 3.62830200  | H | -6.52257800 | -0.47454900 | 2.53412400  |
| H  | 3.23812200  | 3.83105300  | 4.64958900  | H | -6.30536400 | 0.27965800  | 4.62292300  |
| H  | 6.99991100  | 3.91038900  | 1.77476000  |   |             |             |             |
| C  | 1.93193800  | 1.21589300  | -1.38715000 |   |             |             |             |
| C  | 1.47081700  | 2.51965200  | -1.79155600 |   |             |             |             |
| C  | 2.64513900  | 0.43295000  | -2.27894200 |   |             |             |             |
| C  | 0.69759900  | 3.38137200  | -0.96466500 |   |             |             |             |
| C  | 1.80926800  | 2.97945400  | -3.11181600 |   |             |             |             |
| C  | 2.95603000  | 0.88950600  | -3.58101100 |   |             |             |             |
| H  | 3.00556100  | -0.53924400 | -1.96553500 |   |             |             |             |
| C  | 0.29756500  | 4.62393900  | -1.40959000 |   |             |             |             |
| H  | 0.39593700  | 3.06604200  | 0.02678400  |   |             |             |             |
| C  | 1.38620400  | 4.26850400  | -3.53330900 |   |             |             |             |
| C  | 2.55271200  | 2.14000900  | -3.98347900 |   |             |             |             |
| H  | 3.52271300  | 0.24988400  | -4.25186900 |   |             |             |             |
| C  | 0.64763100  | 5.07833100  | -2.70169000 |   |             |             |             |
| H  | -0.29409000 | 5.25845000  | -0.75604700 |   |             |             |             |
| H  | 1.65810800  | 4.60208100  | -4.53159200 |   |             |             |             |
| H  | 2.79504900  | 2.50519200  | -4.97828500 |   |             |             |             |
| H  | 0.33038700  | 6.06234900  | -3.03445500 |   |             |             |             |
| Rh | -0.90579300 | 0.14029500  | 0.24682200  |   |             |             |             |
| H  | -0.94825700 | 0.69569500  | -1.16369900 |   |             |             |             |
| H  | -2.61231800 | 0.14940000  | 0.18514600  |   |             |             |             |
| C  | -6.64216600 | 1.45089500  | -3.10117100 |   |             |             |             |
| C  | -5.43424300 | 1.78642600  | -2.49950800 |   |             |             |             |
| C  | -5.19490900 | 1.35602200  | -1.19424500 |   |             |             |             |



## 8. NMR Spectra

### 8.1 NMR Spectra of the substrates

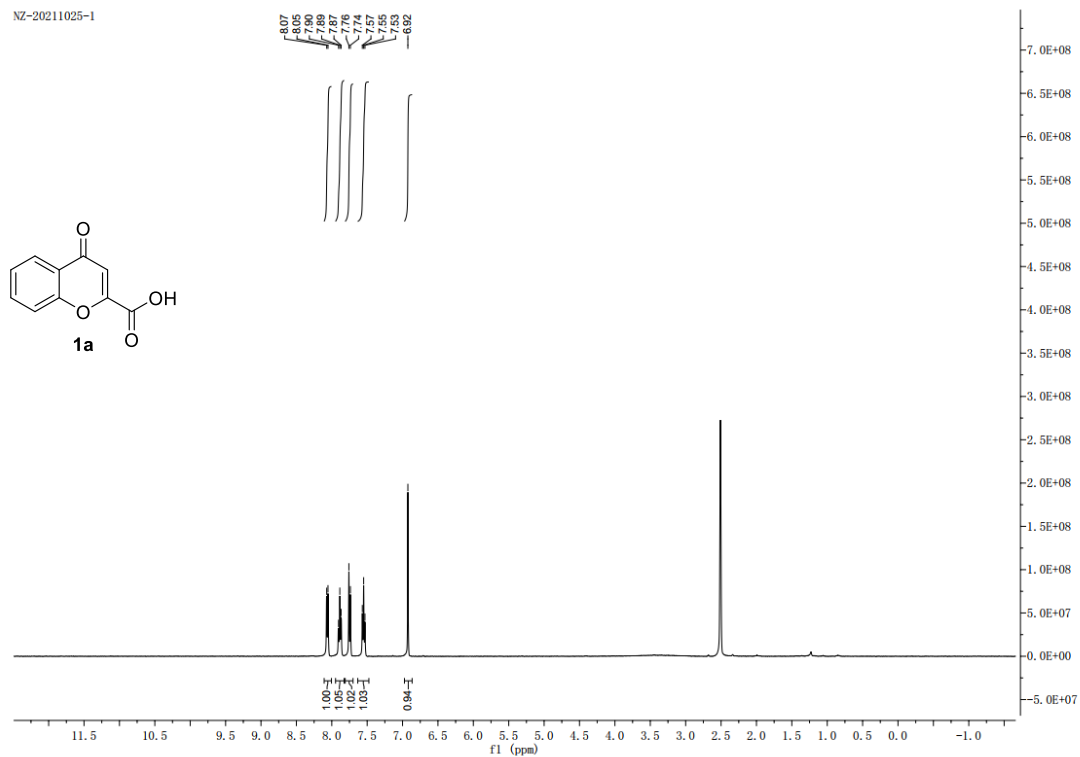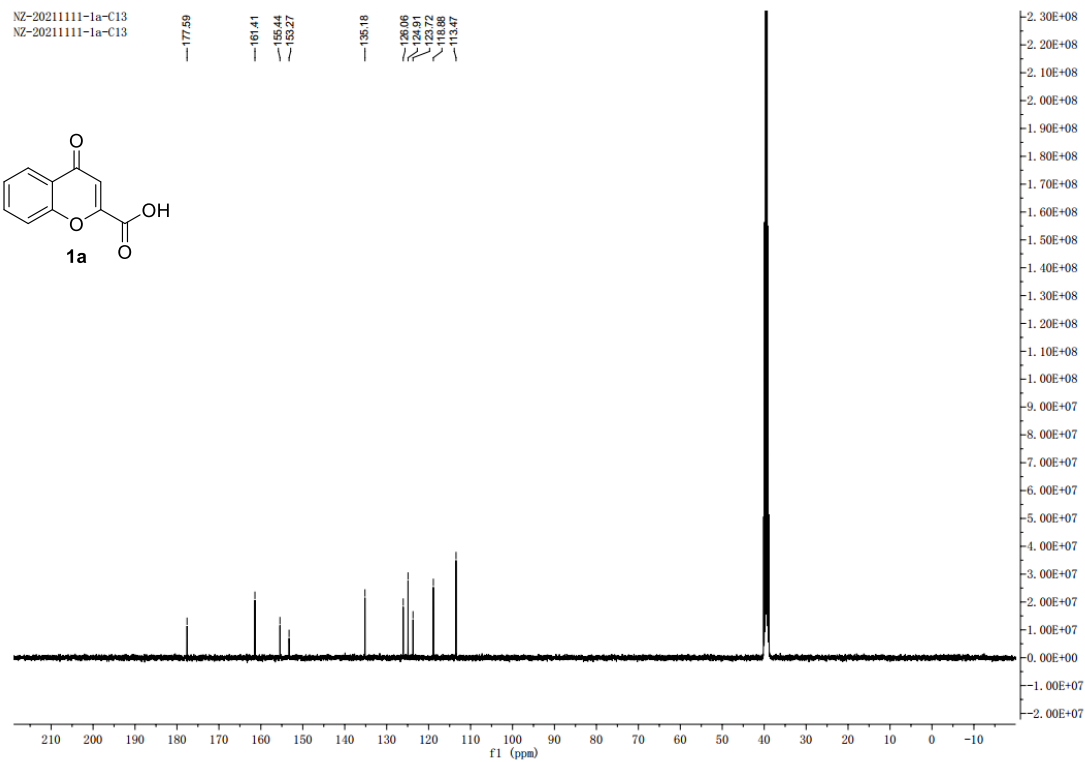

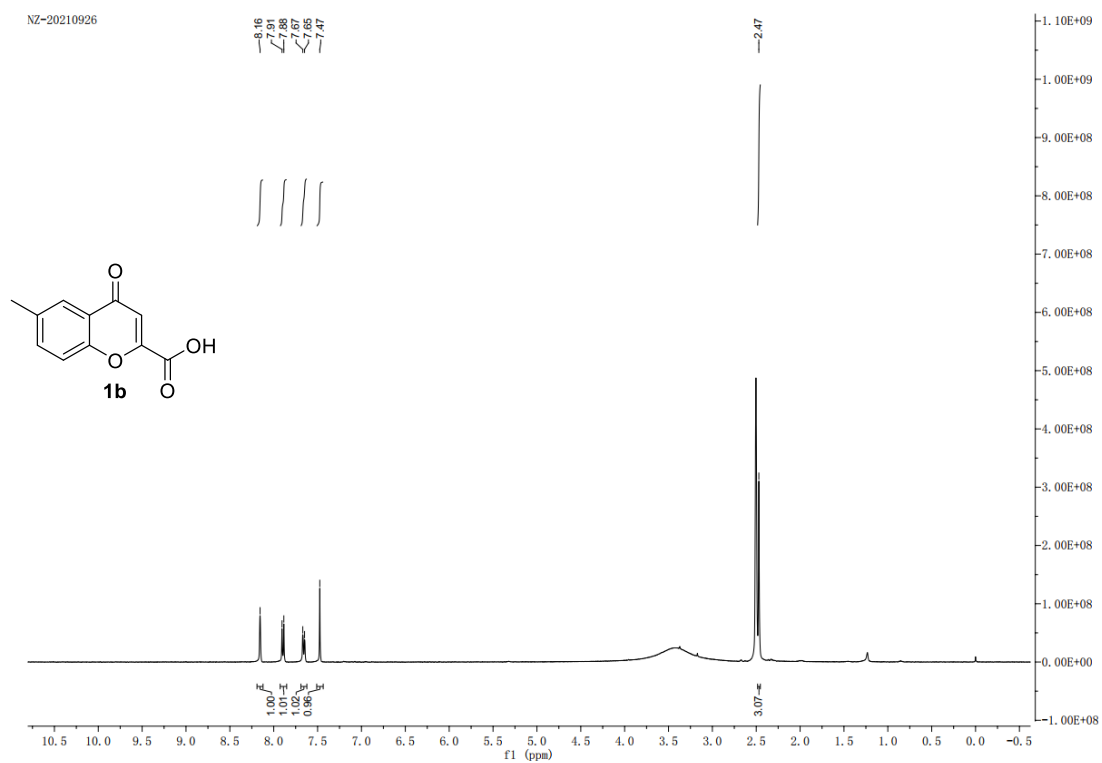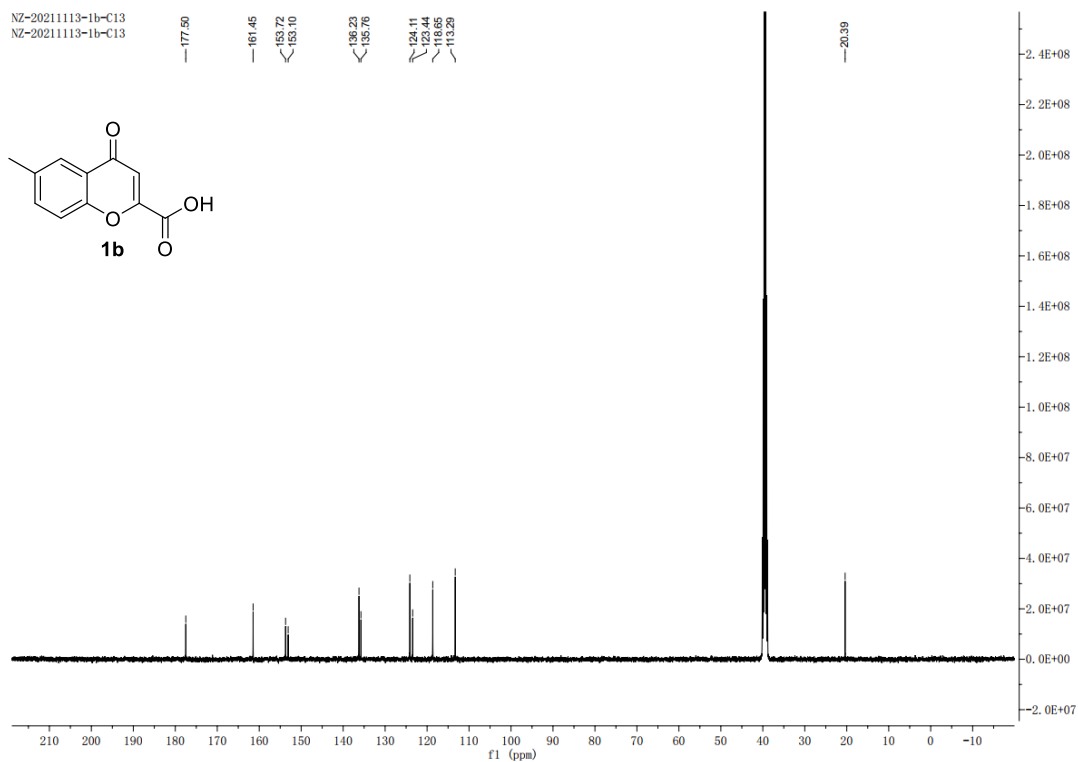

NZ-20210412-4-CH3

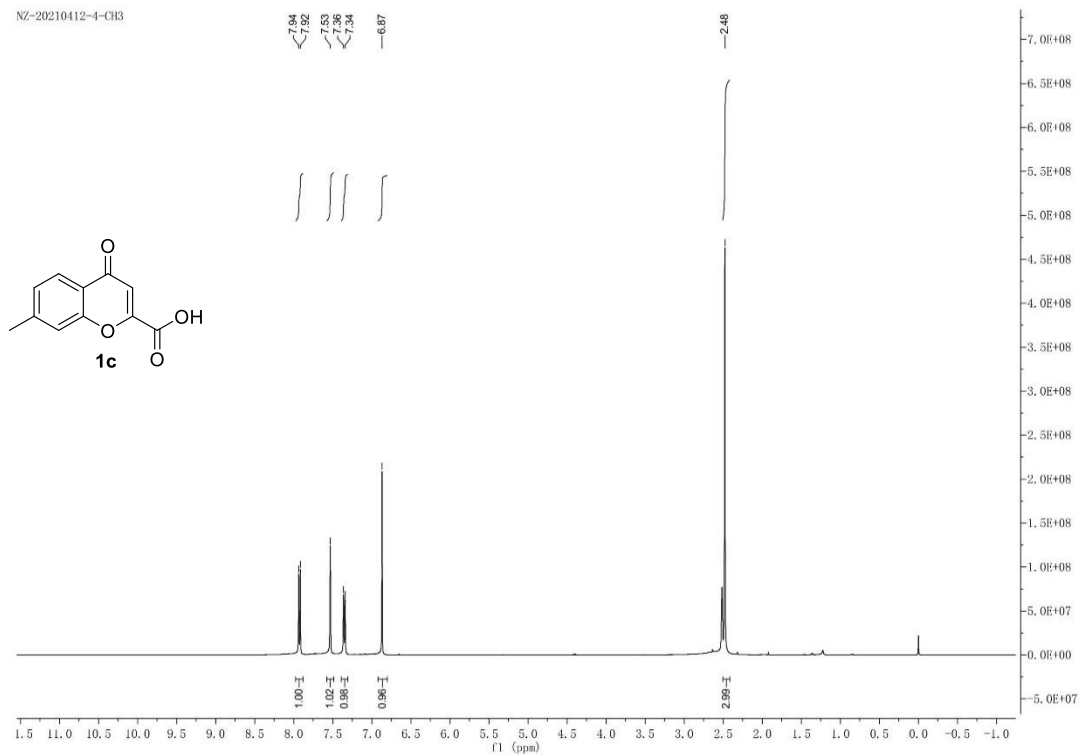

NZ-20211111-1c-C13  
NZ-20211111-1c-C13

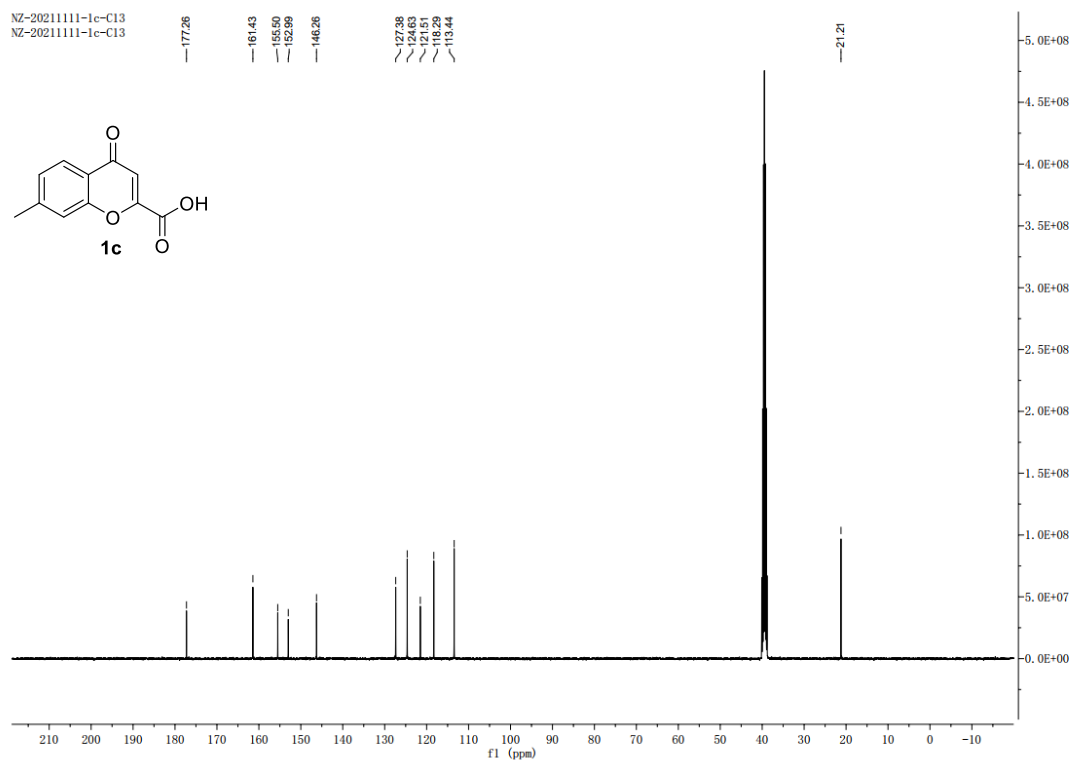

NZ-20210412-4-O-Me

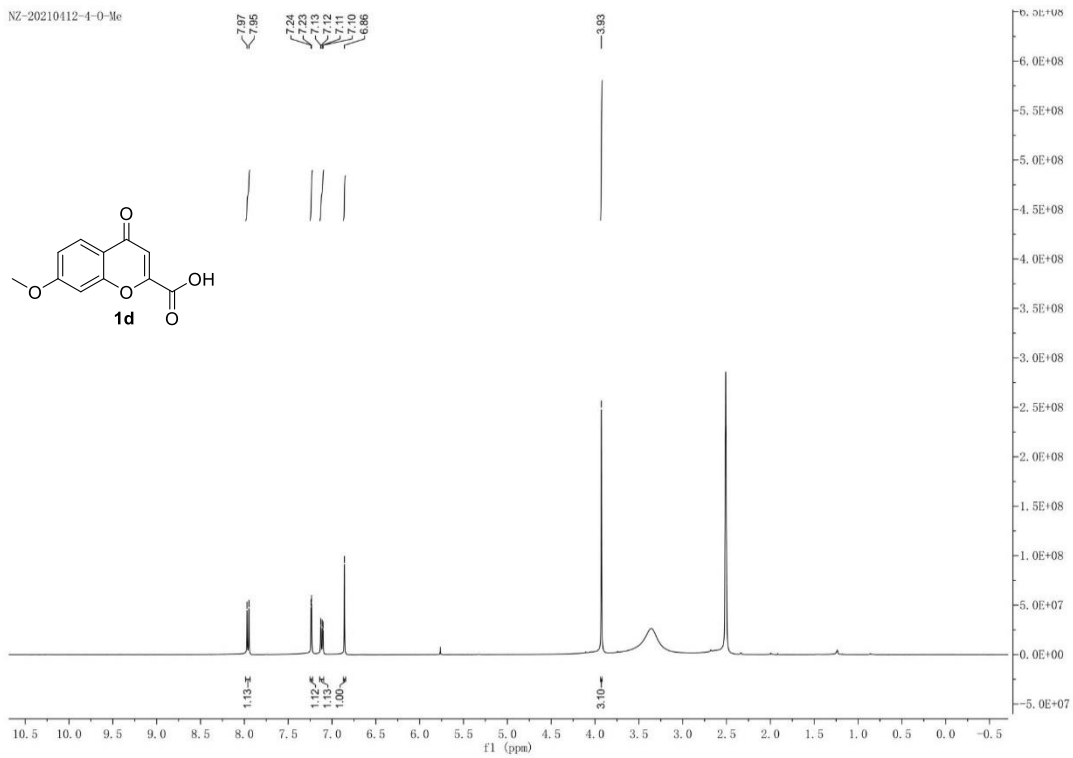

NZ-20211111-1d-C13  
NZ-20211111-1d-C13

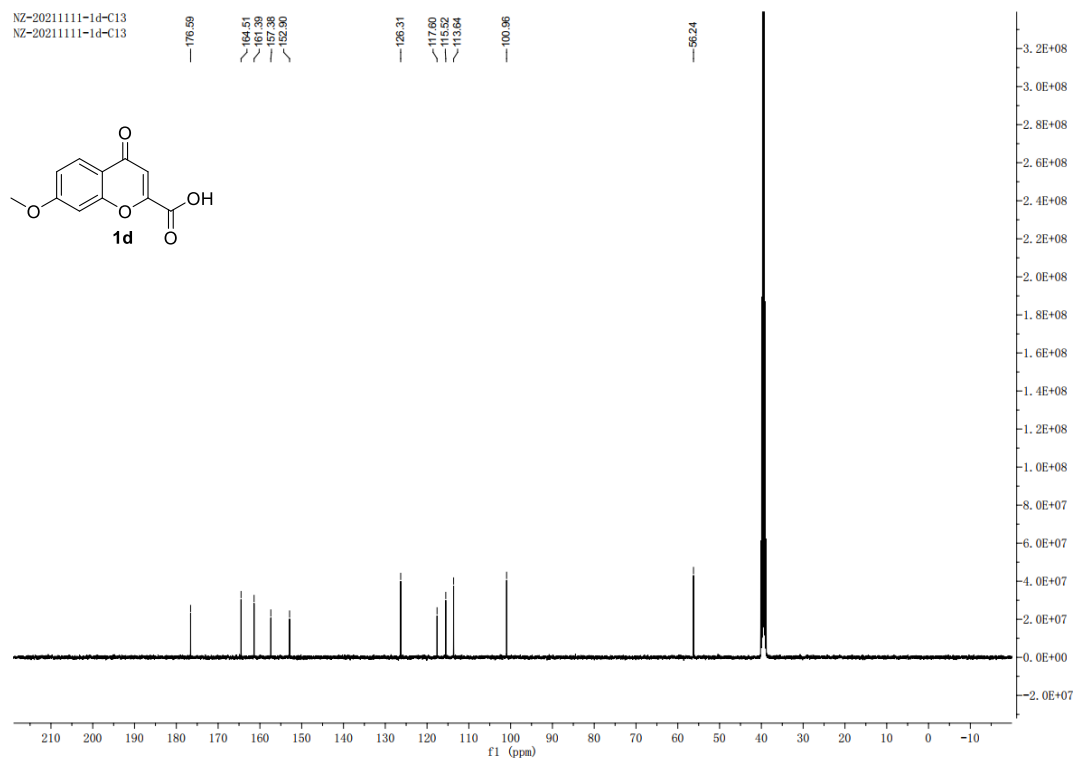

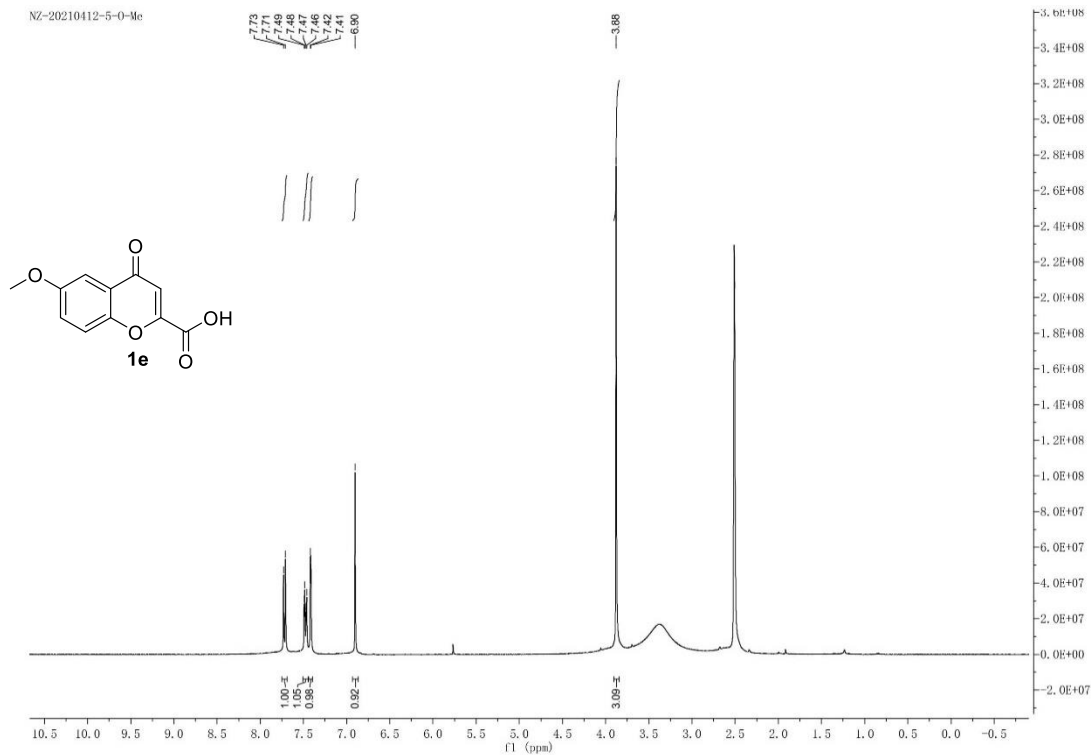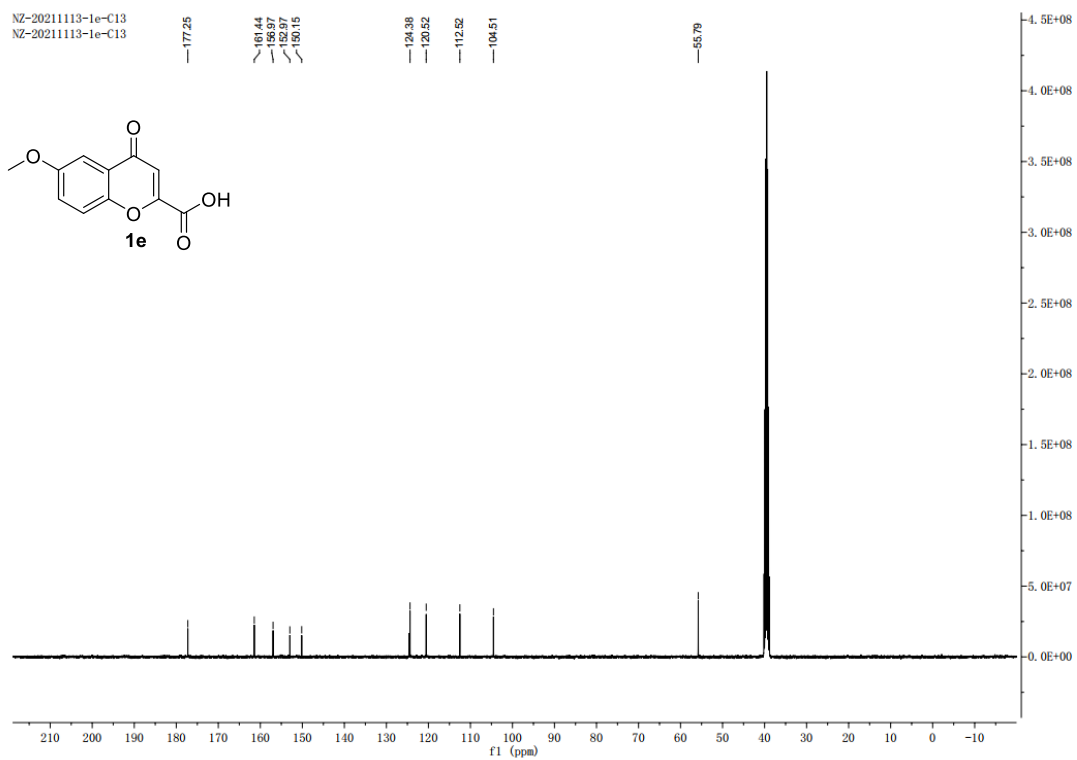

NZ-20210522-t-Bu

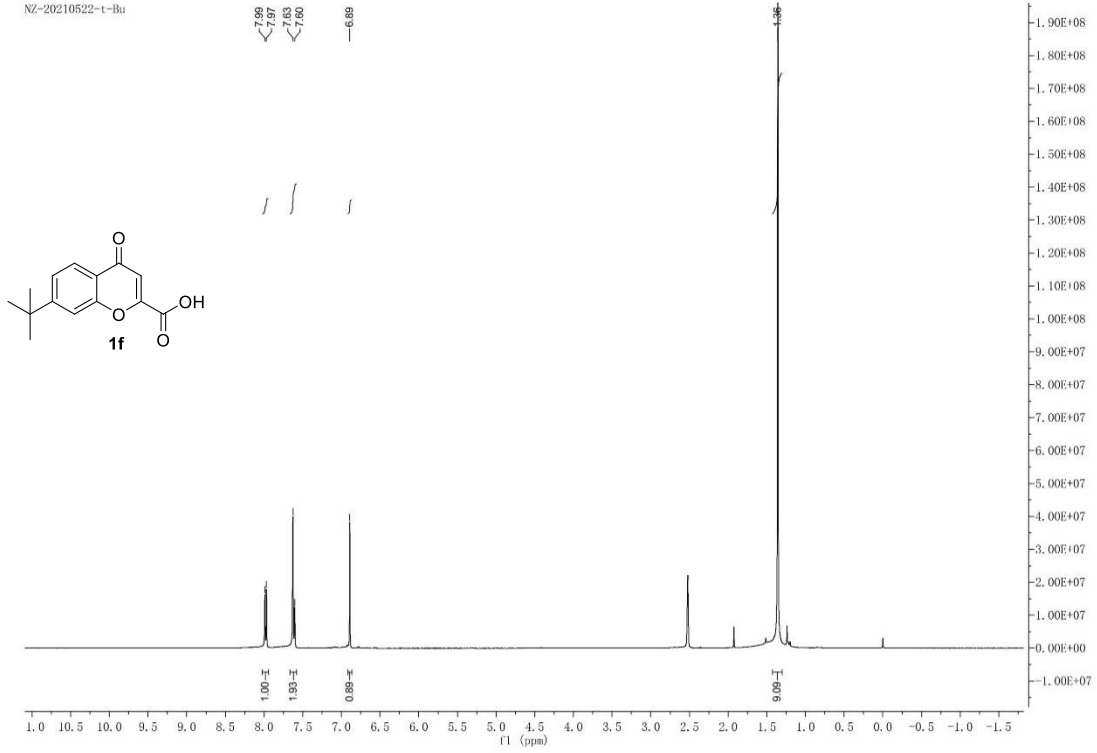

NZ-20211111-1f-C13  
NZ-20211111-1f-C13

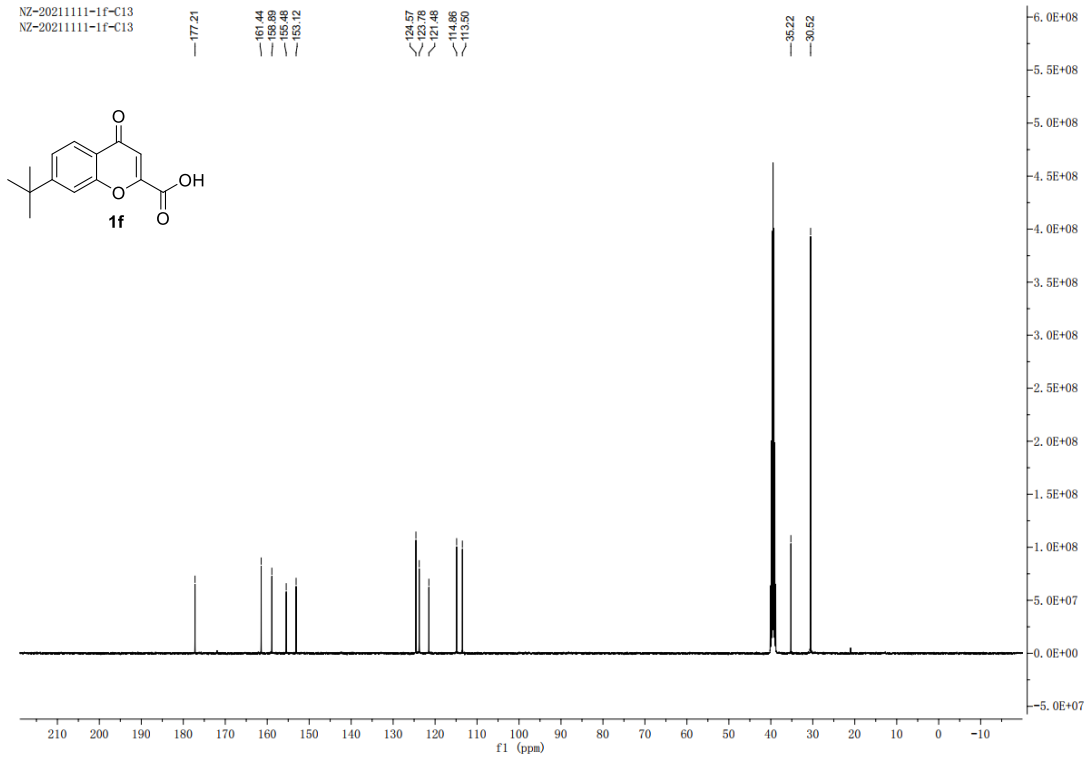

NZ-20210513-QU JIAJI

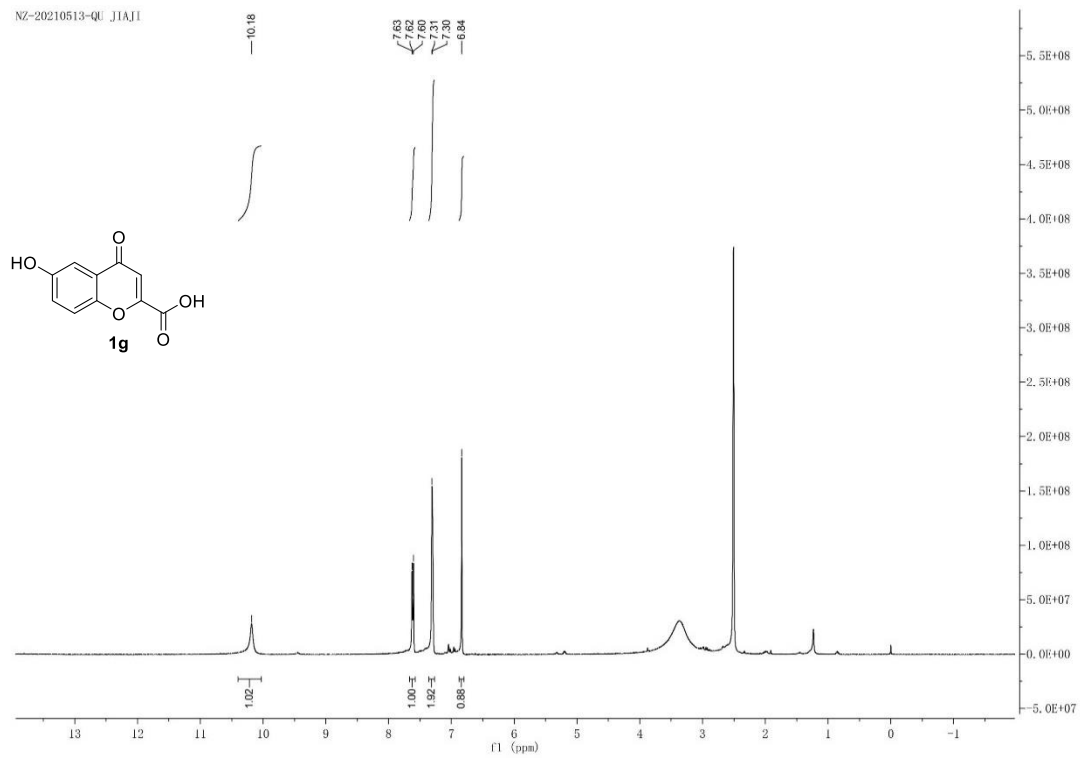

NZ-20211111-1g-C13  
NZ-20211111-1g-C13

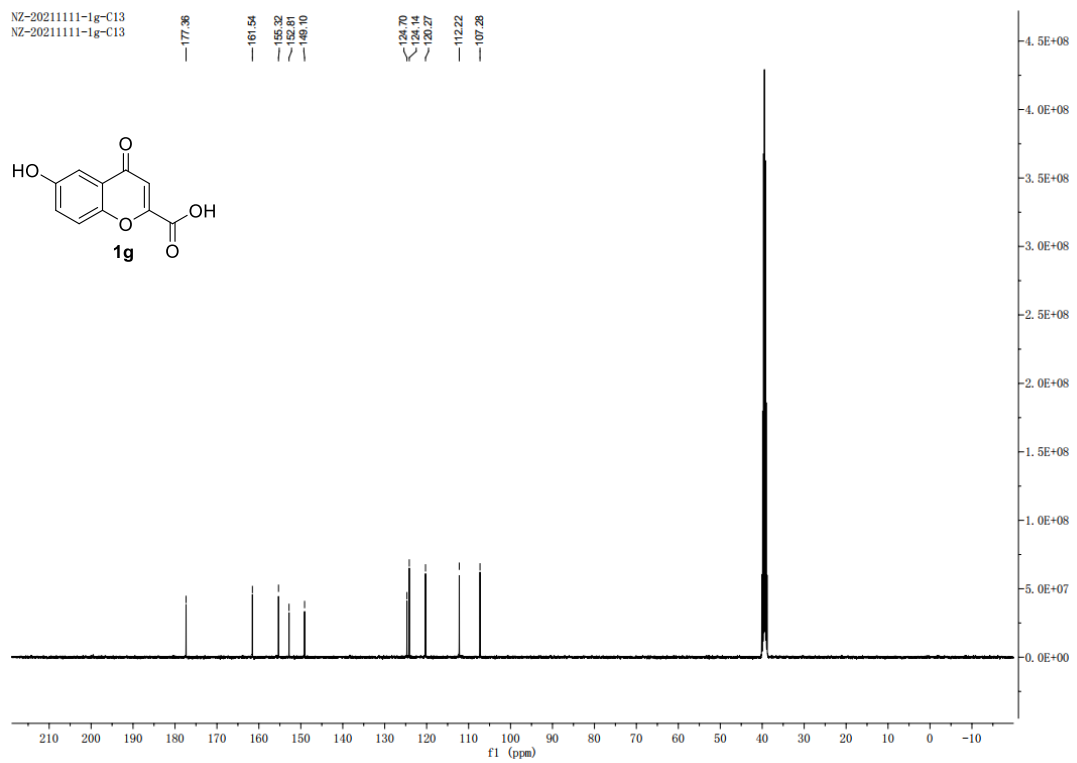

NZ-20210412-6-F

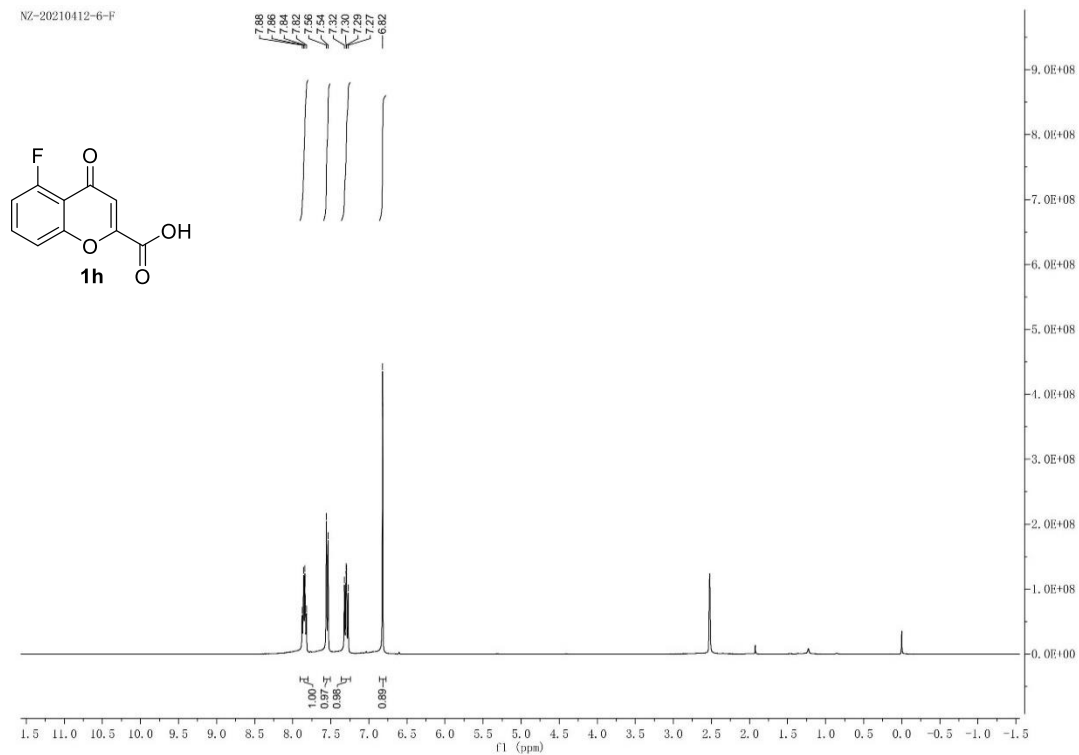

NZ-20211111-1h-C13  
NZ-20211111-1h-C13

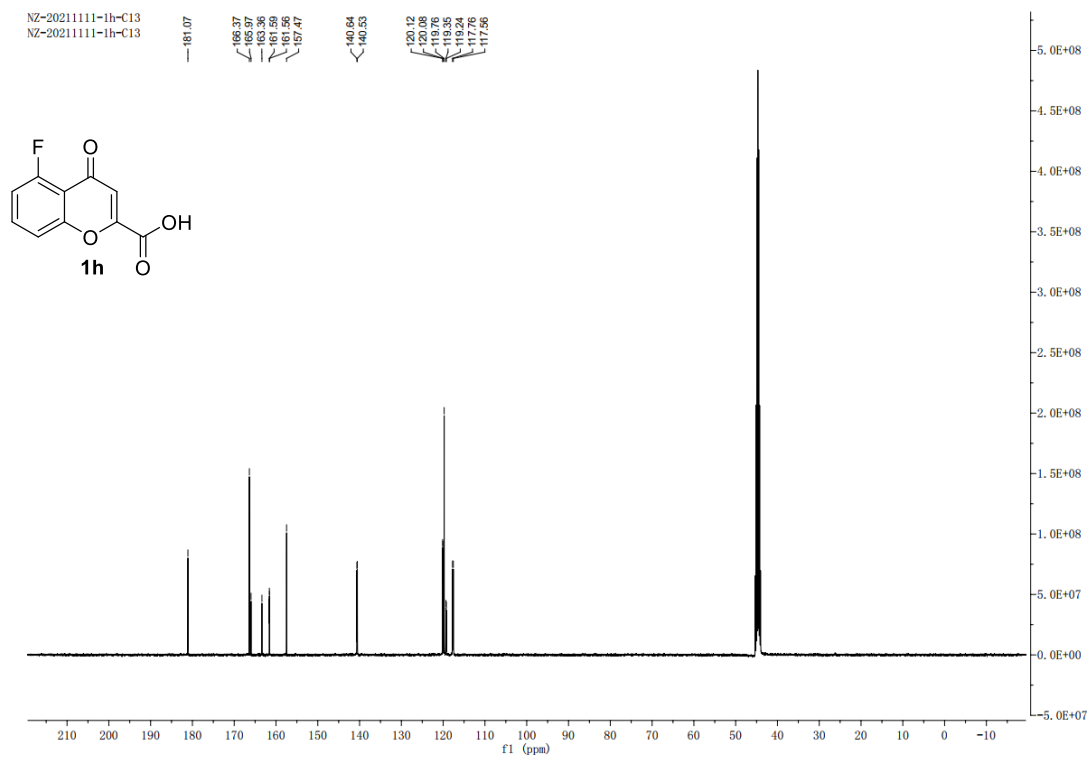



NZ-20210412-6-F-F

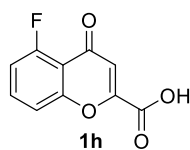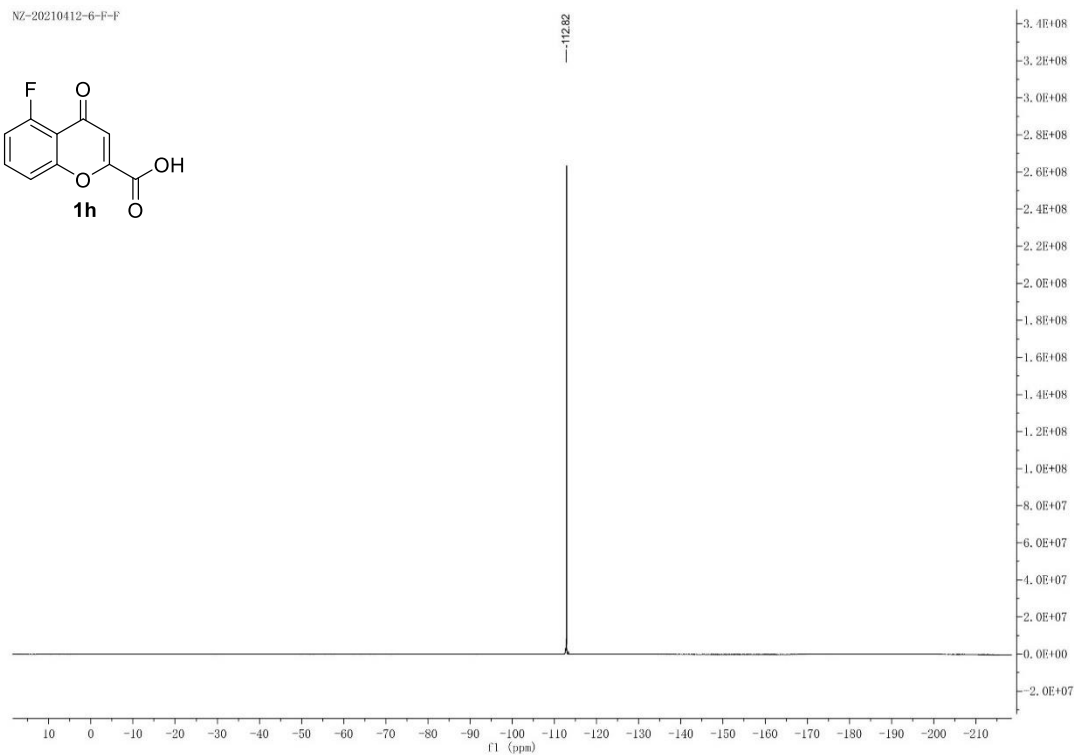

NZ-20210412-5-F

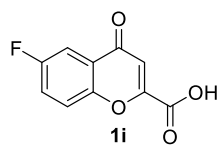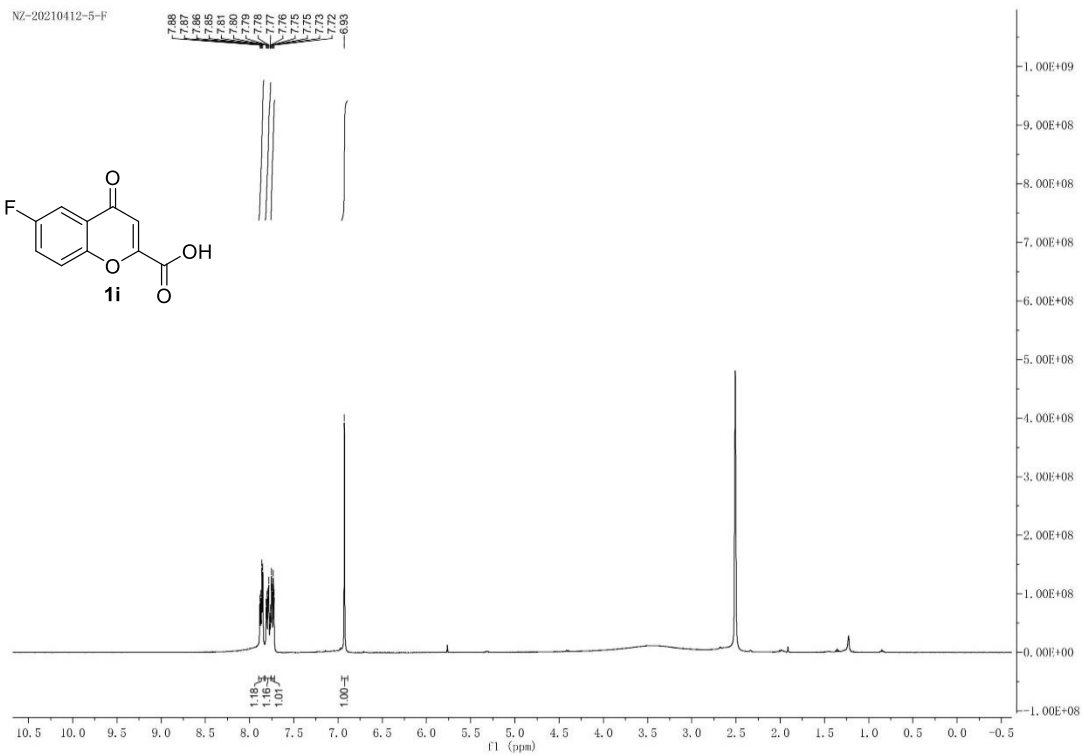

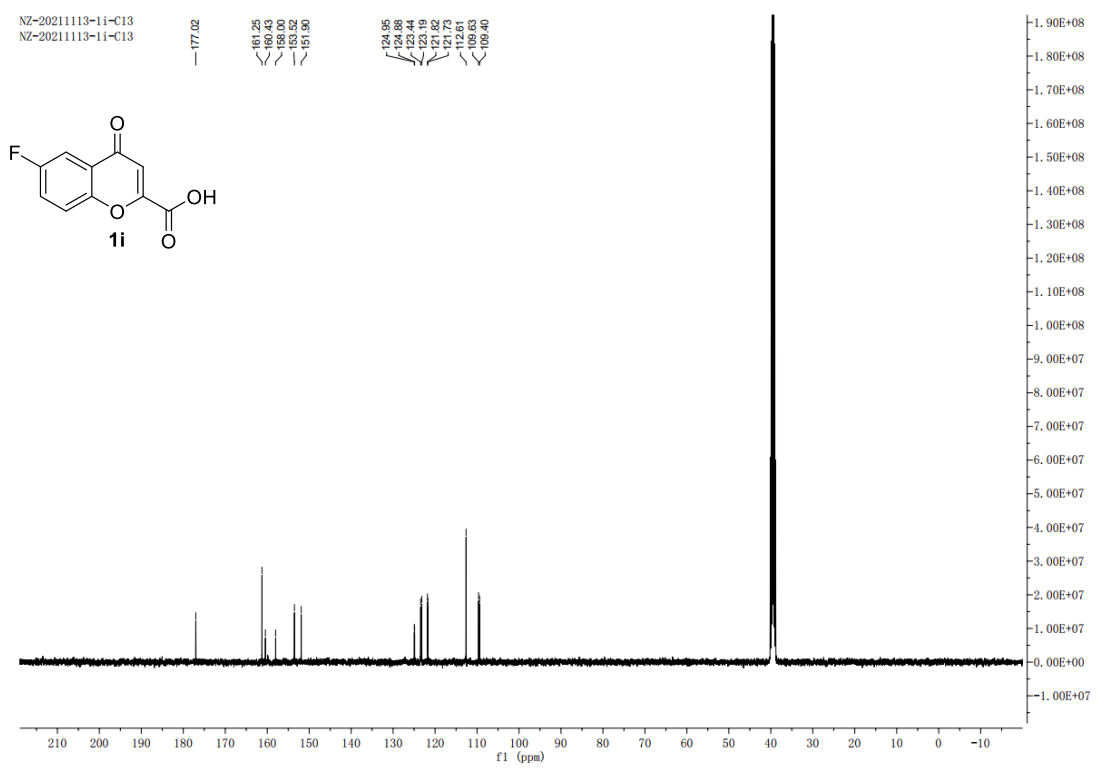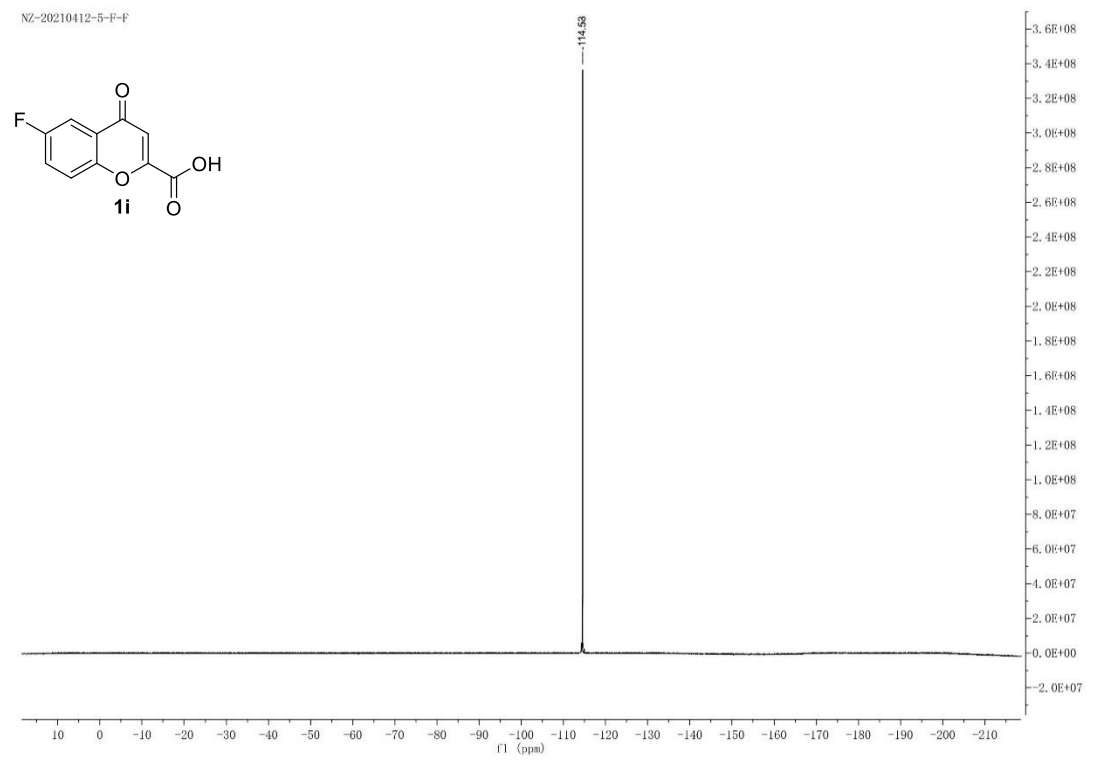

NZ-20210412-4-F

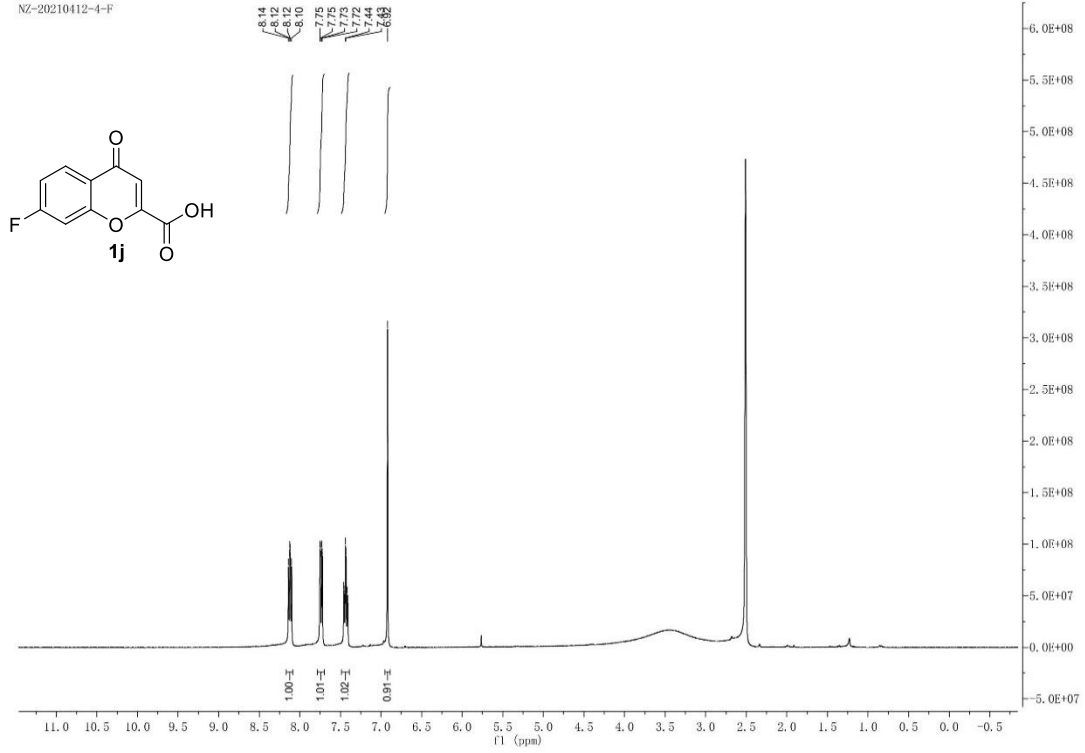

NZ-20211113-1j-C13  
NZ-20211113-1j-C13

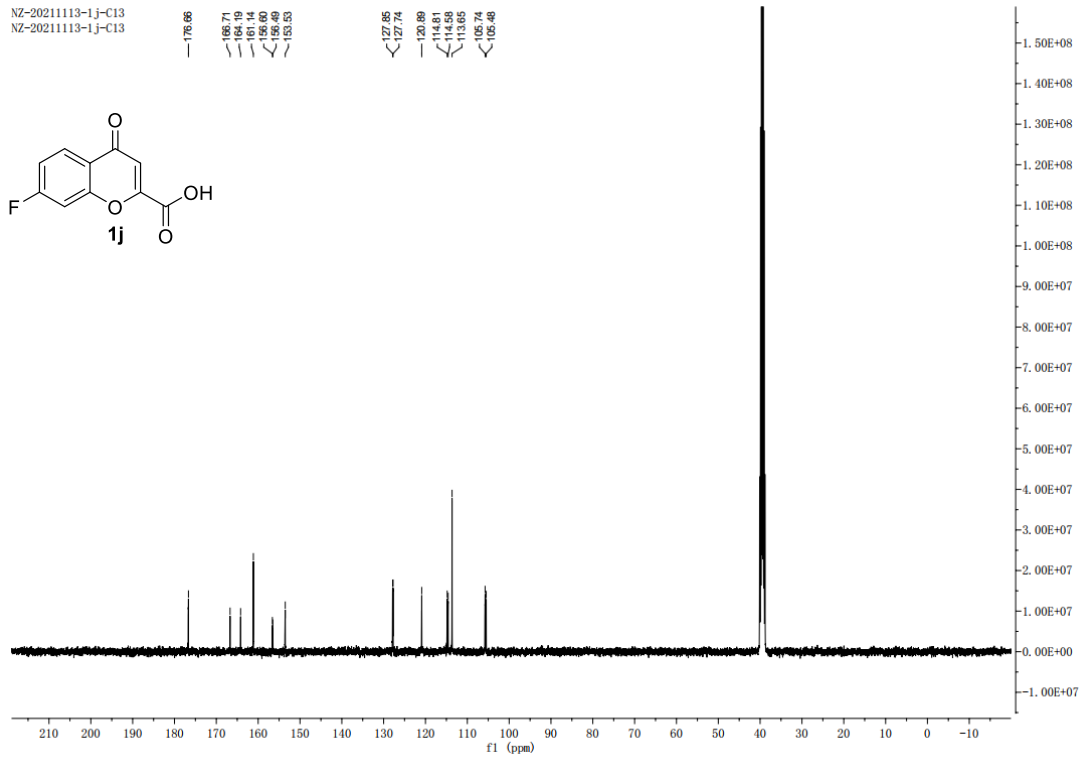

NZ-20210412-4-F-F

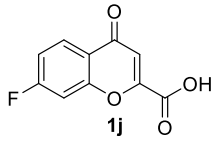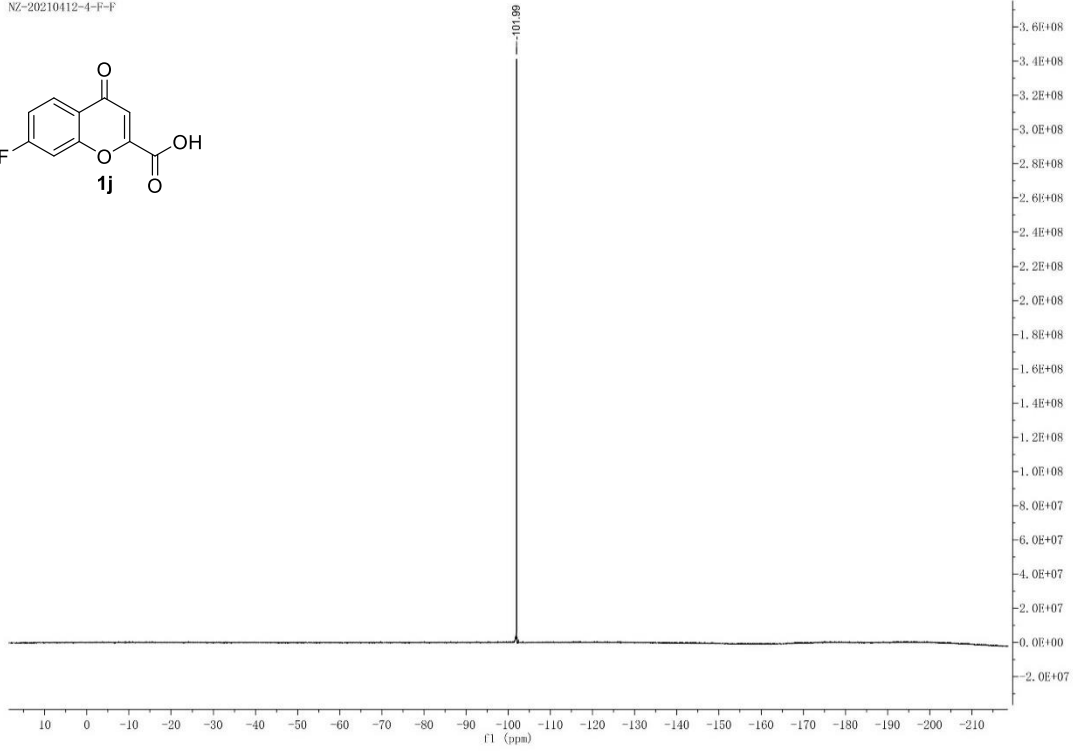

NZ-20210412-5-Cl

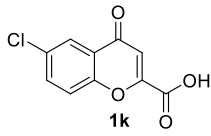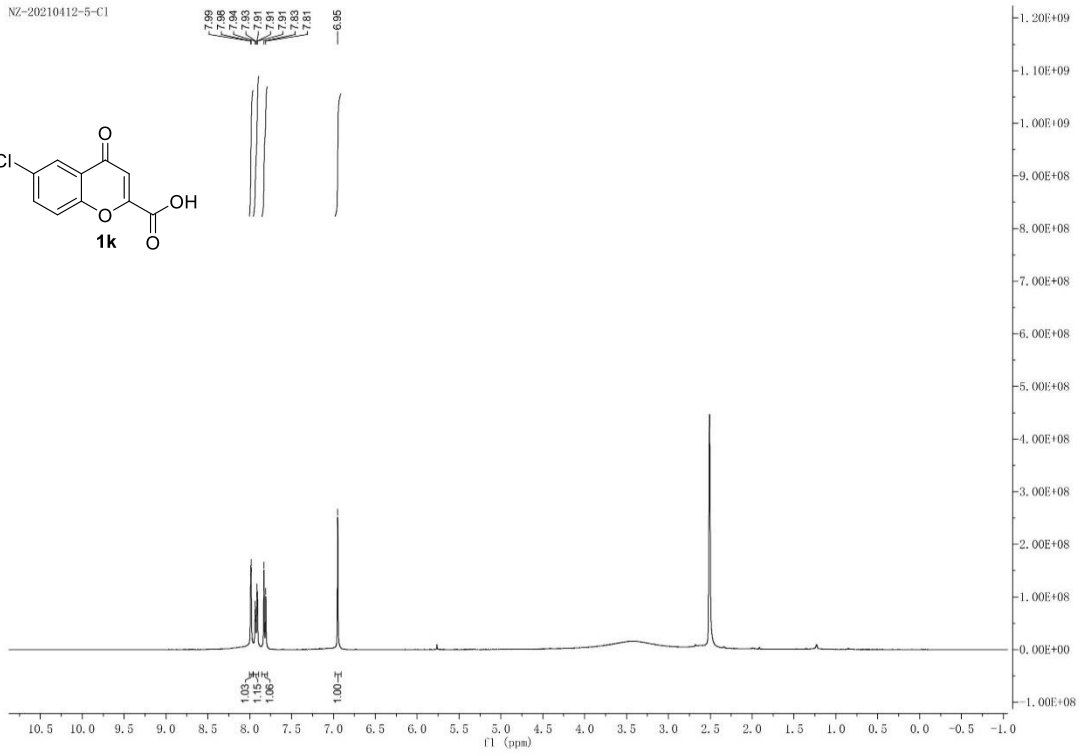

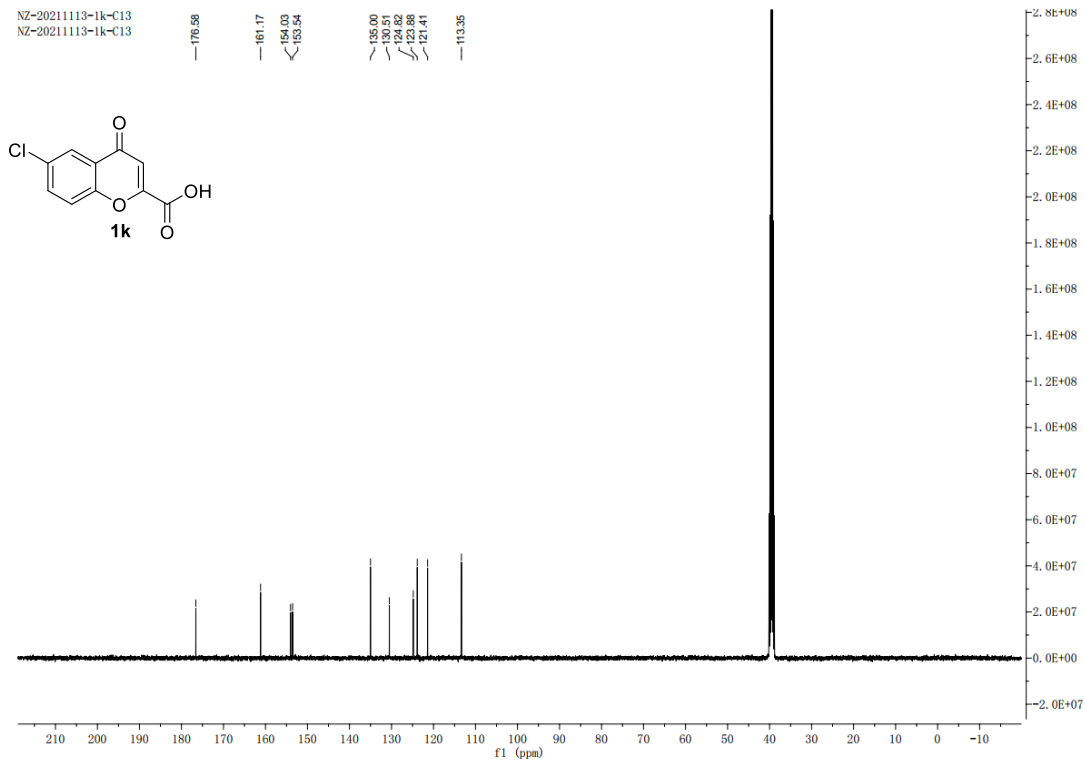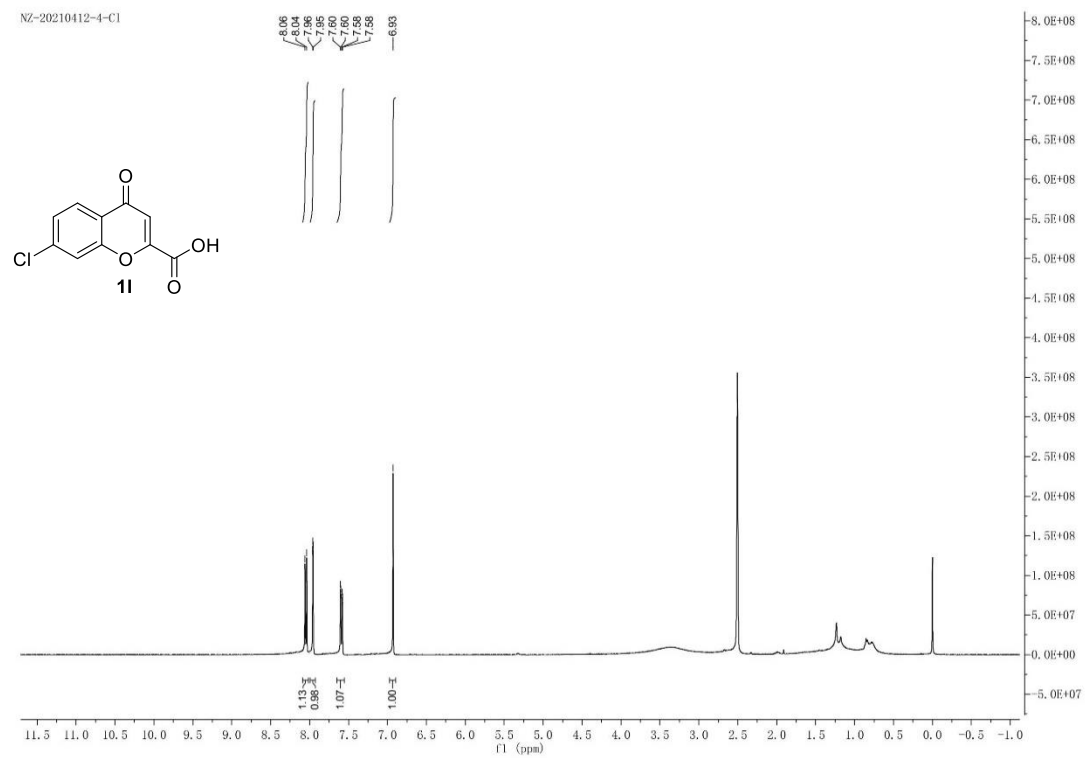

NZ-20211115-11-C13  
NZ-20211115-11-C13

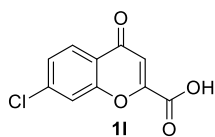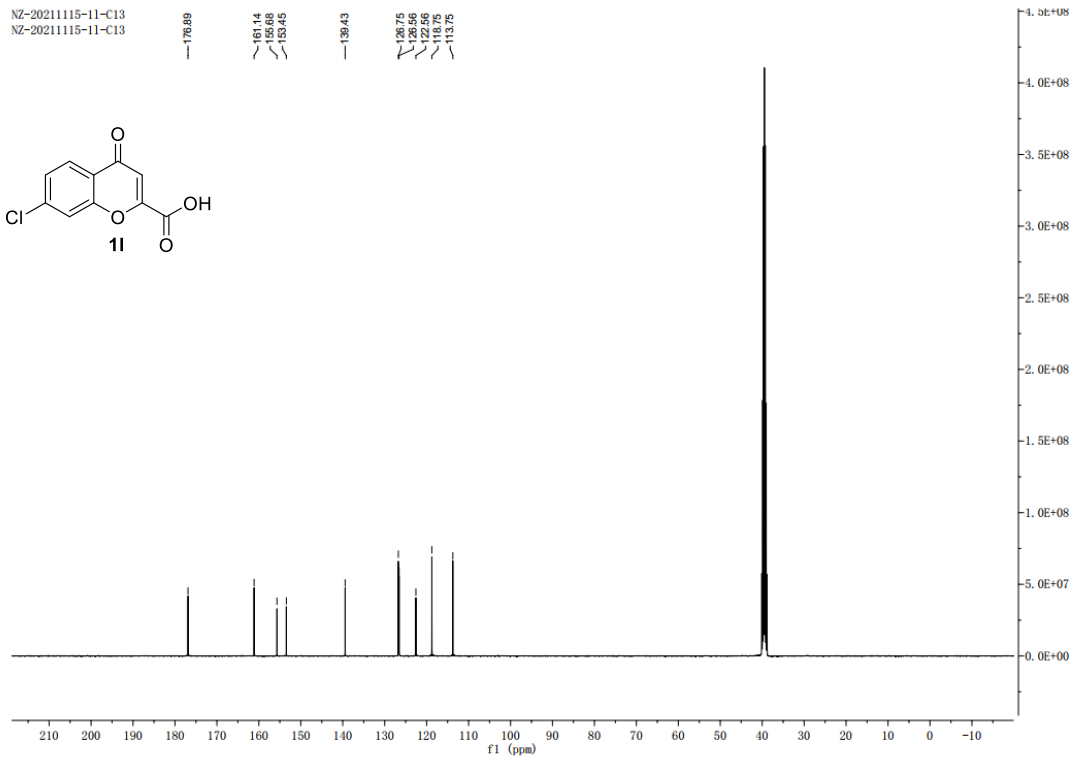

NZ-20210412-5-Br

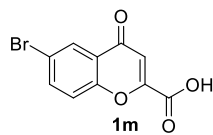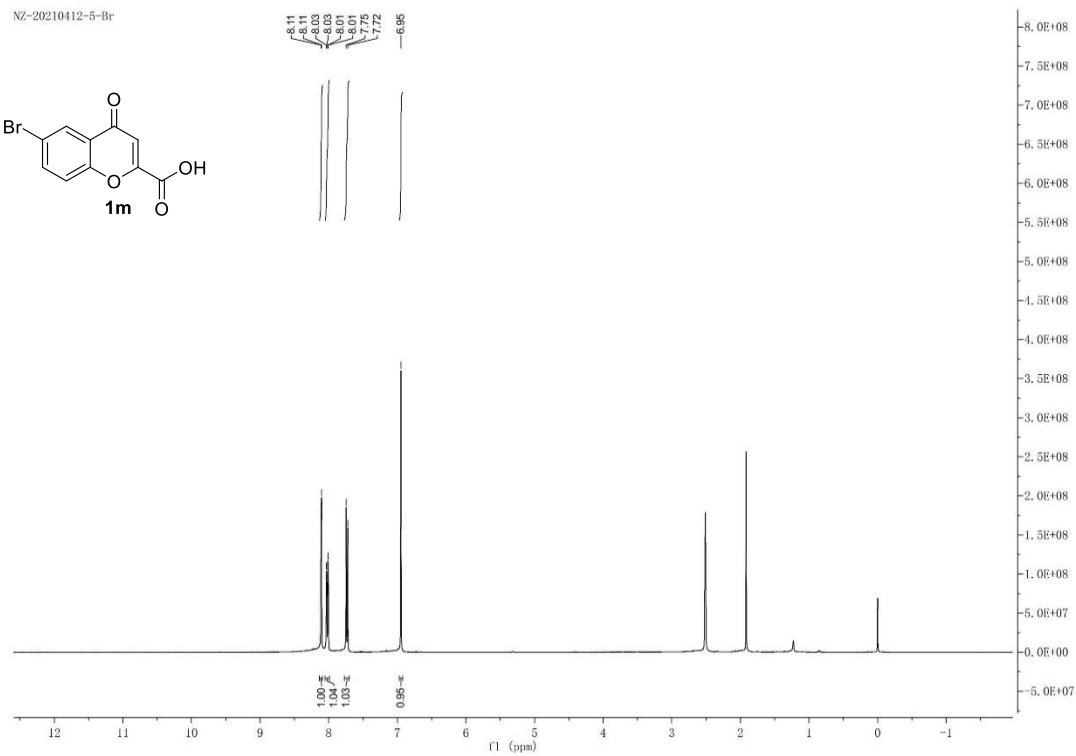

NZ-20211113-1m-C13  
NZ-20211113-1m-C13

176.46  
171.96  
161.17  
154.43  
153.55  
137.73  
127.01  
125.21  
121.99  
119.47

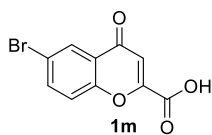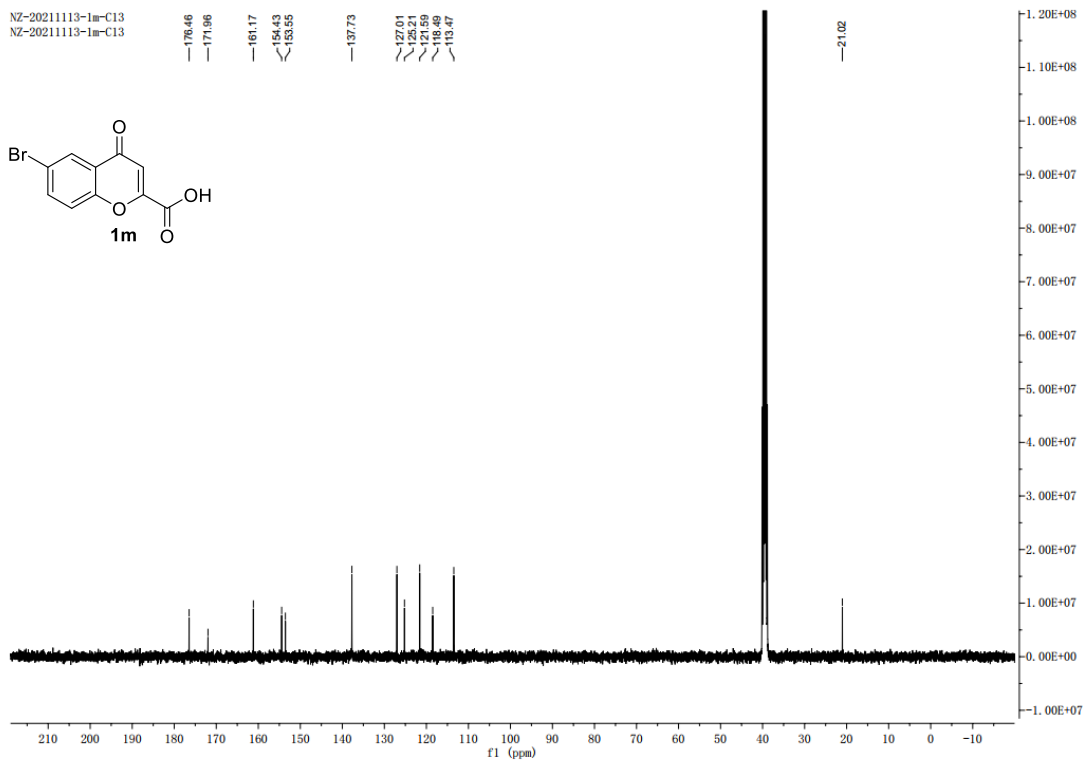

NZ-20210412-4-Br

8.08  
7.97  
7.95  
7.73  
7.71  
7.70  
6.93

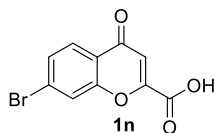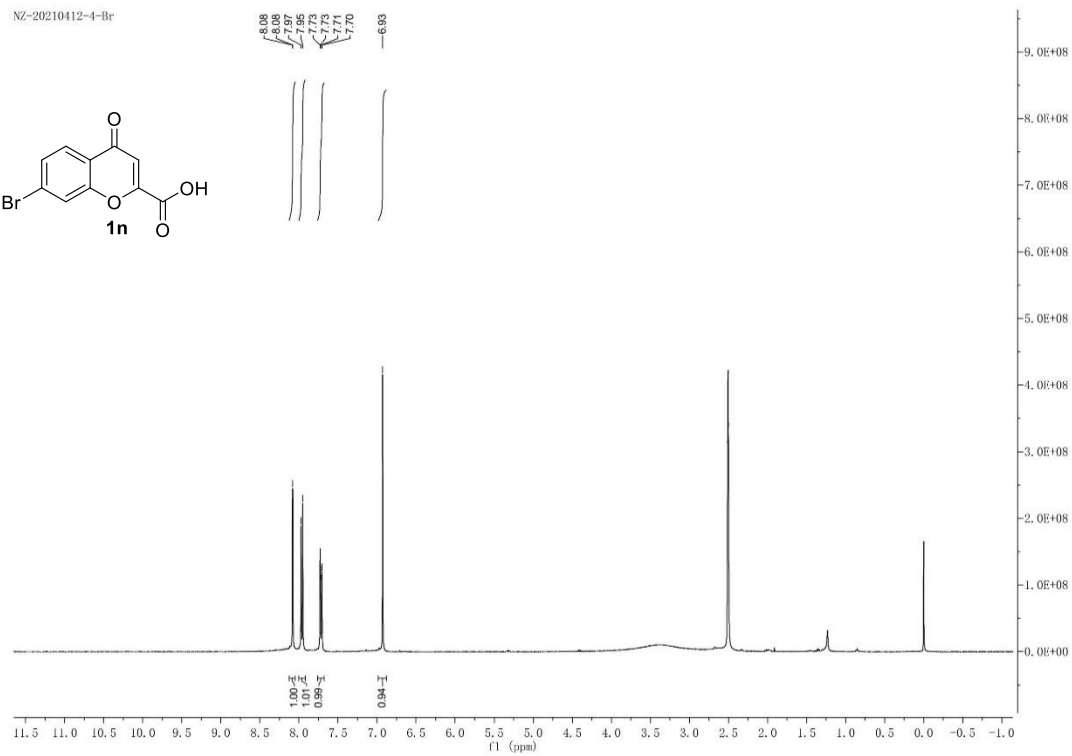

NZ-20211115-2n-C13  
NZ-20211115-2n-C13

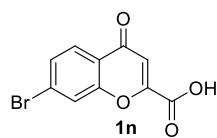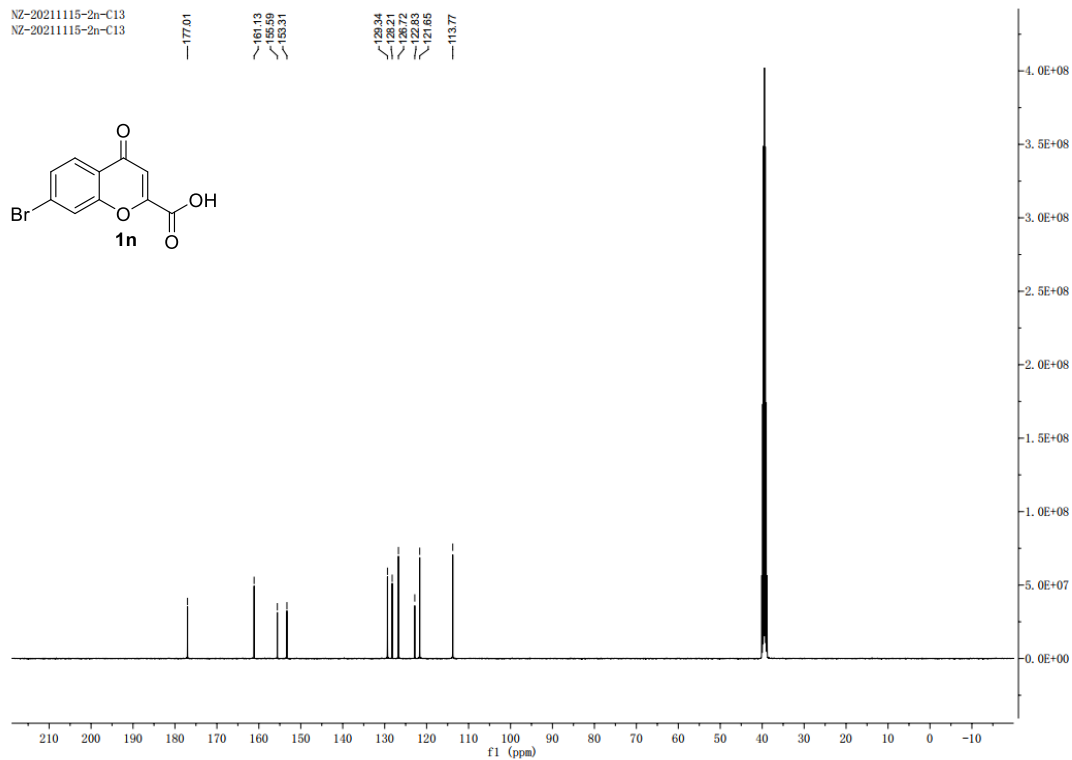

NZ-20210412-5-N02

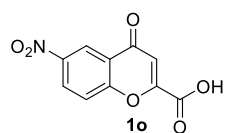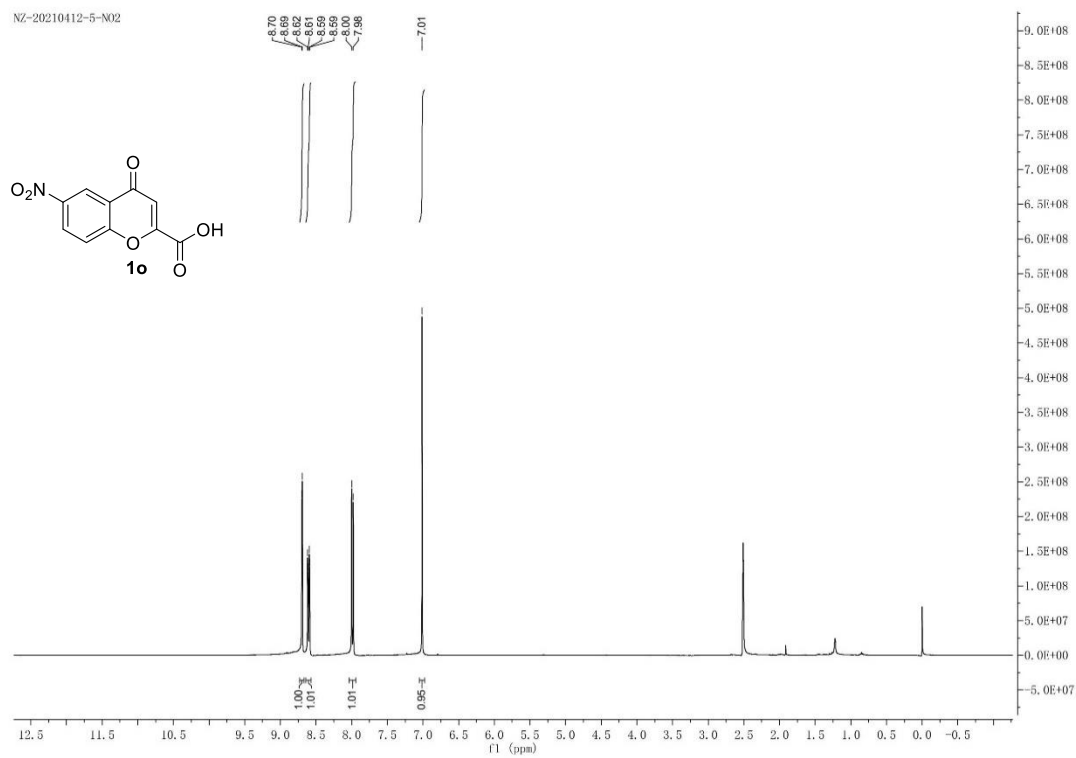



NZ-20211113-1o-C13  
NZ-20211113-1o-C13

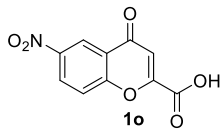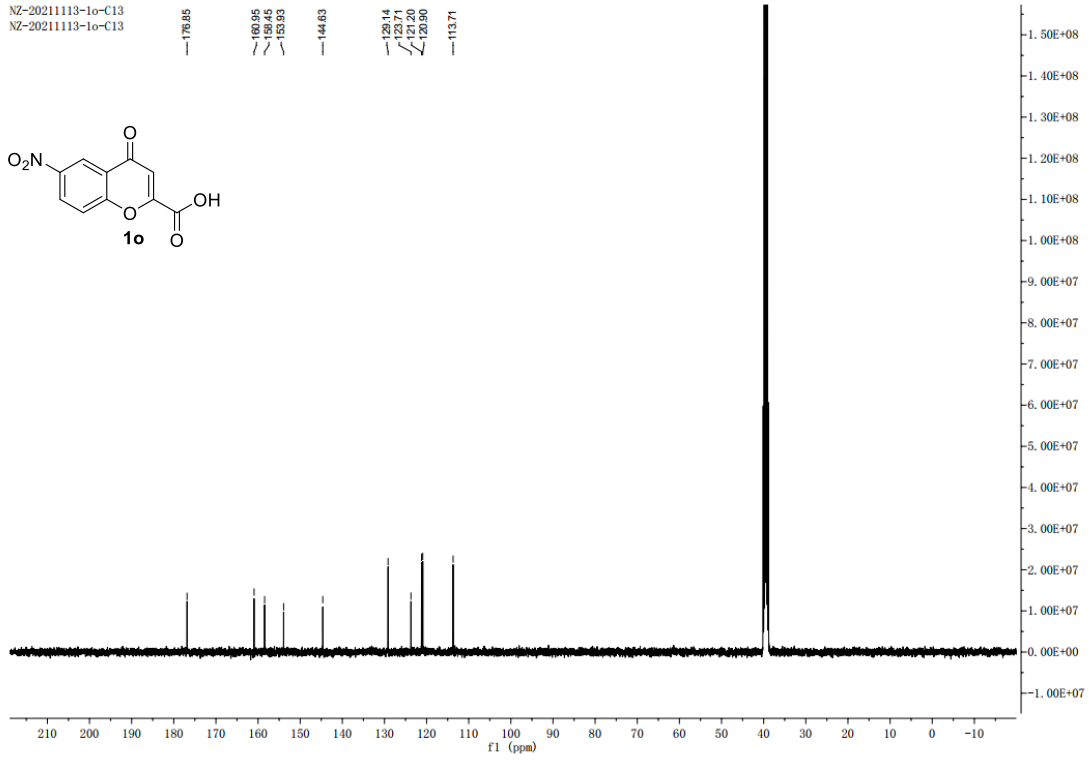

NZ-20210412-3-N02

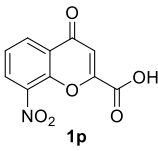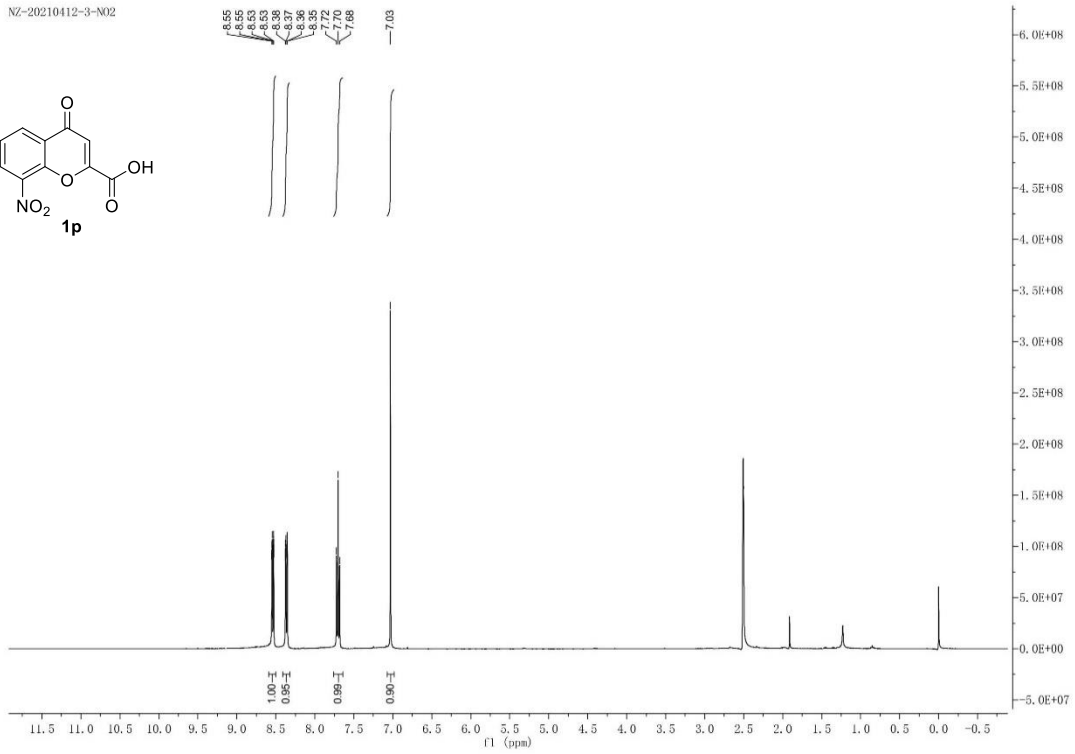

NZ-20211113-1p-C13  
NZ-20211113-1p-C13

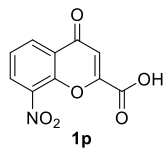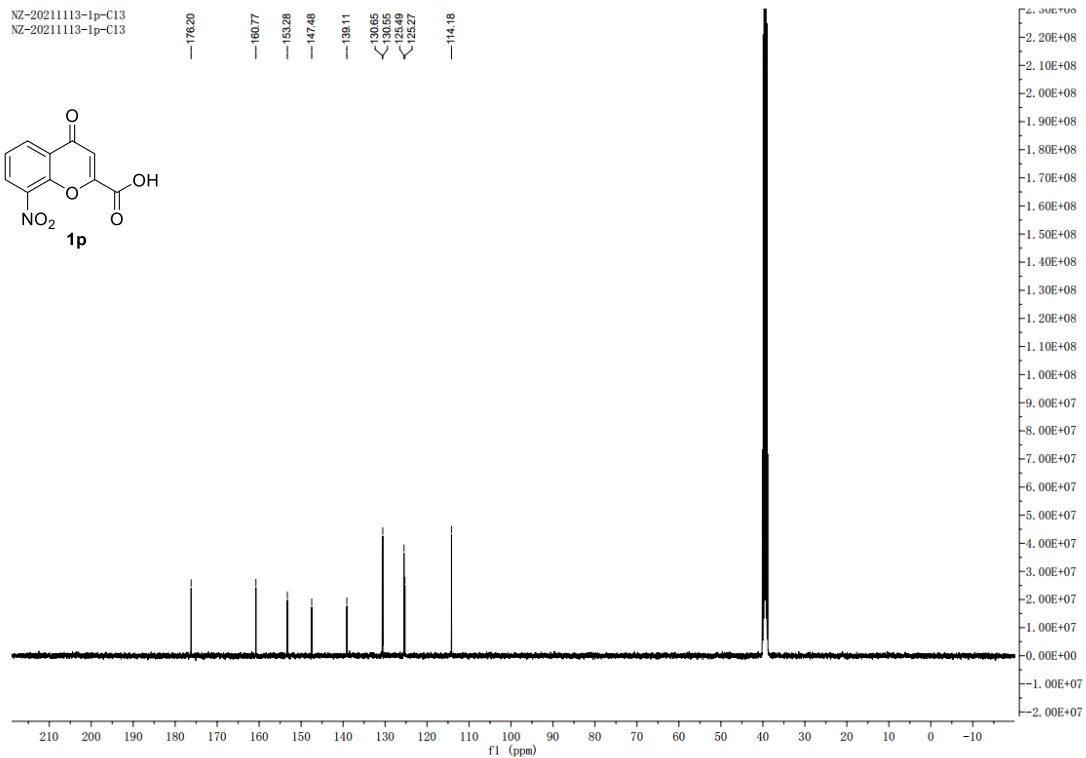

NZ-20210526-2Cl

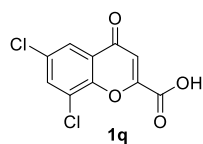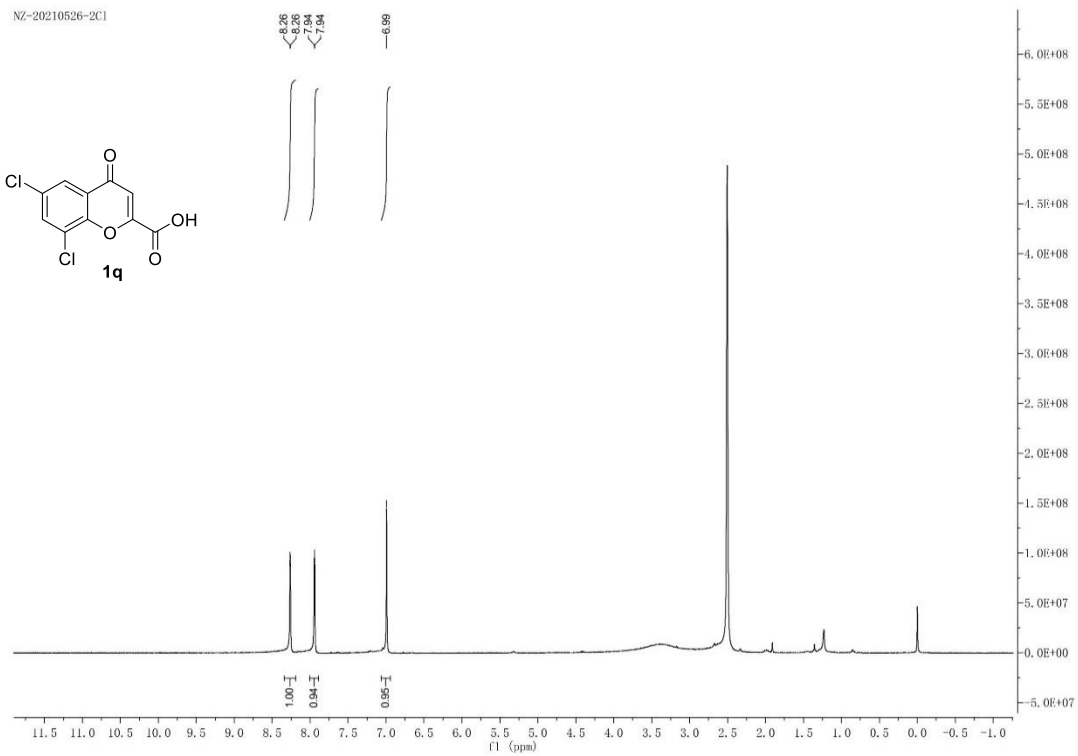

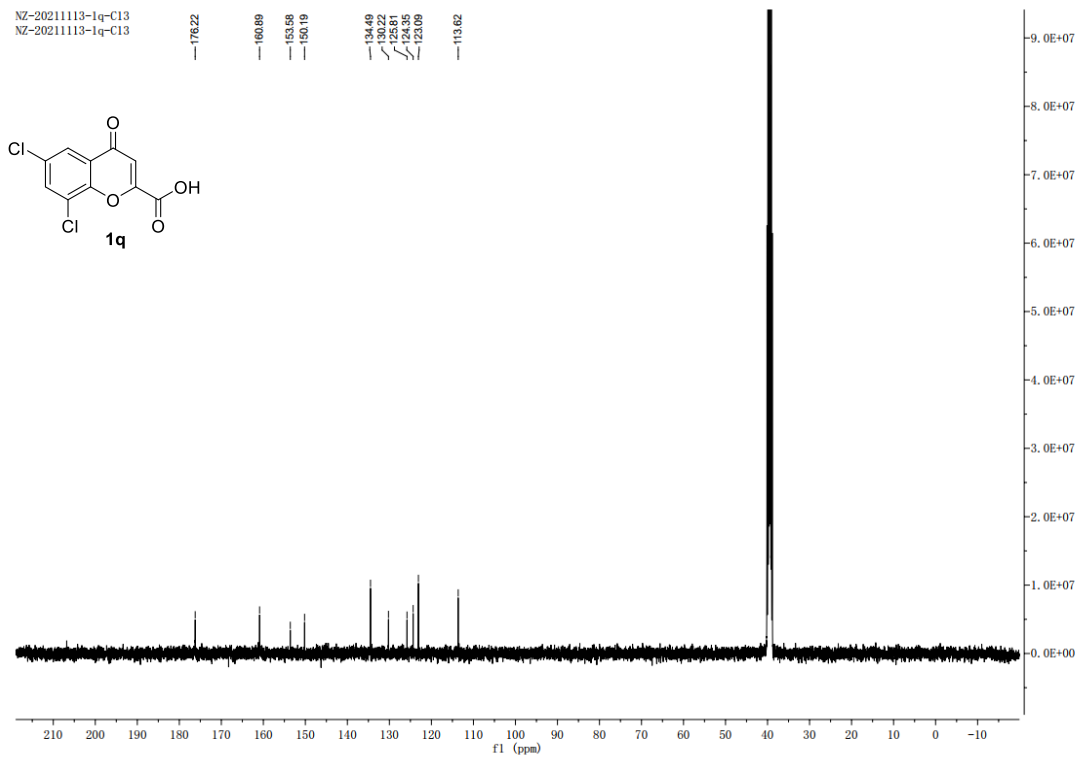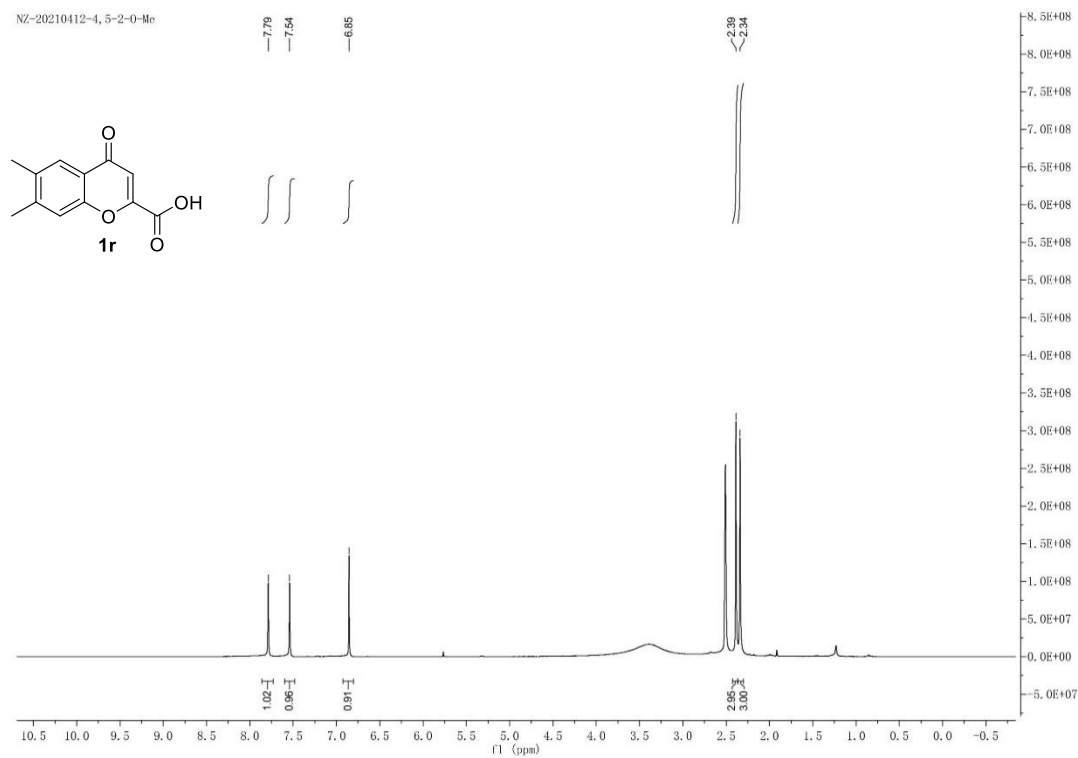

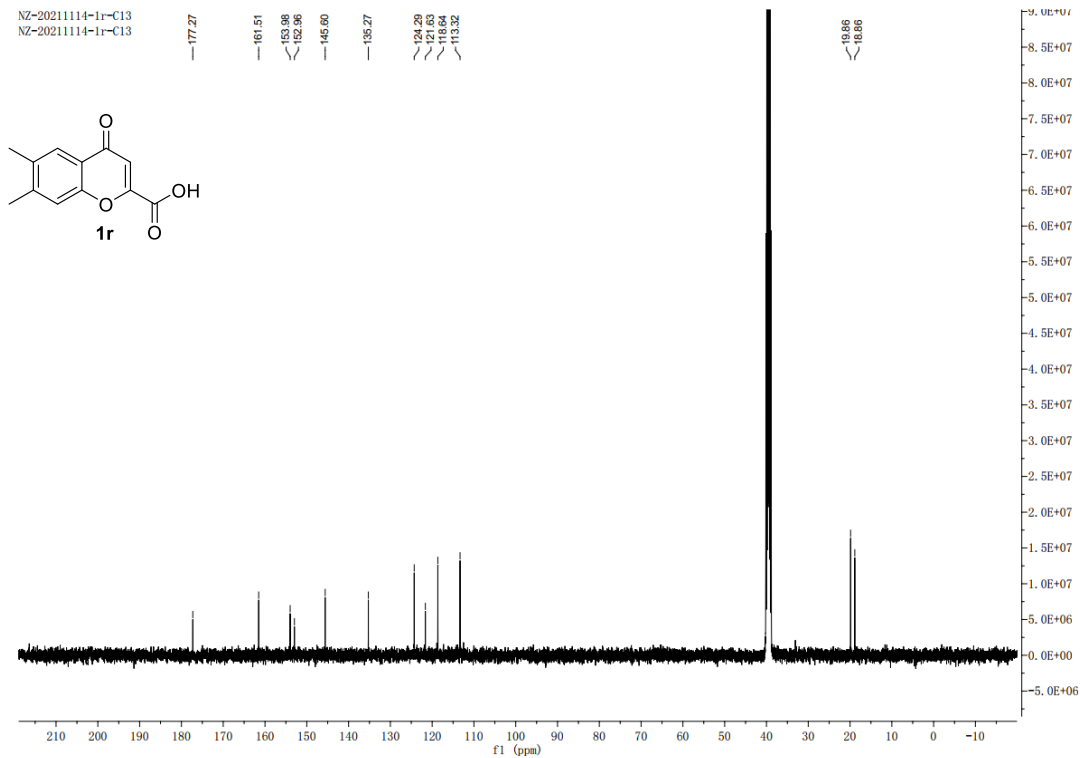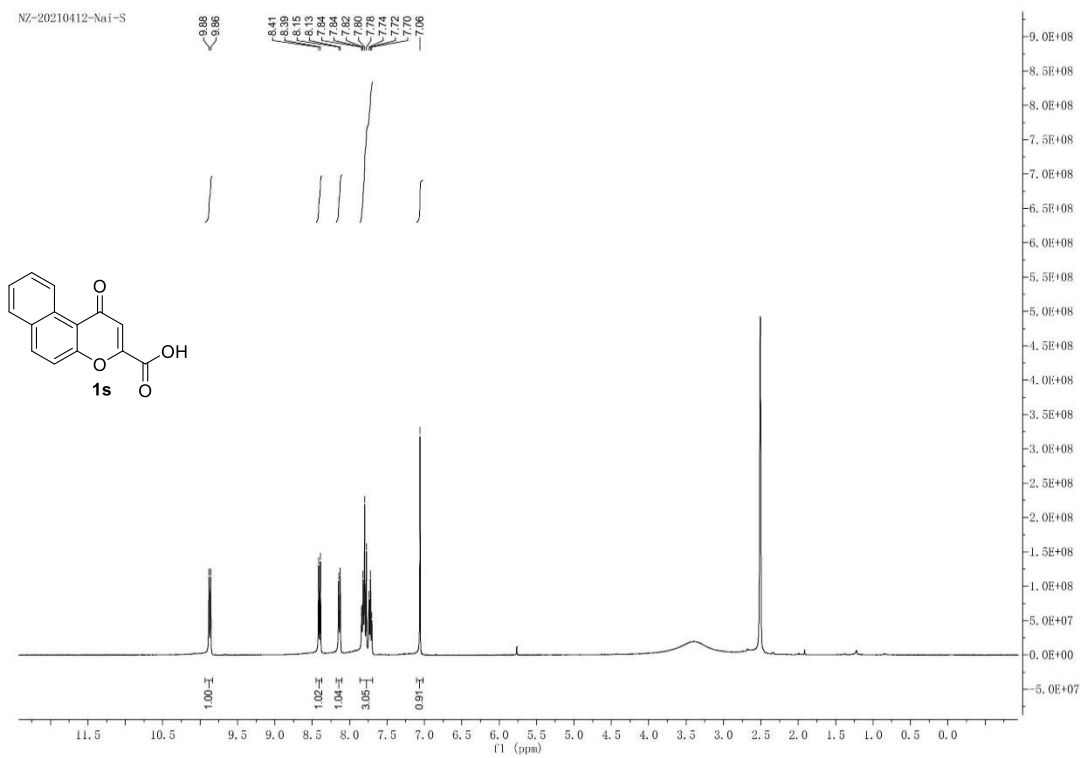

NZ-20211114-1s-C13  
NZ-20211114-1s-C13

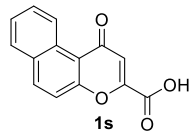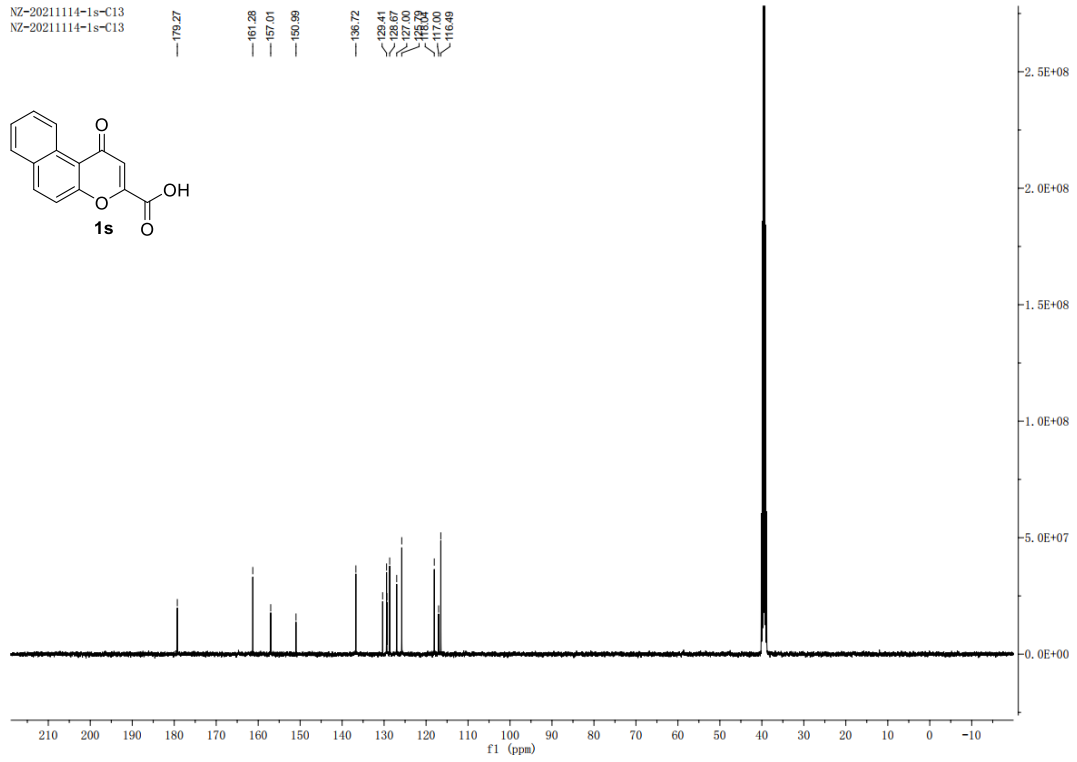

NZ-20210412-Nai-X

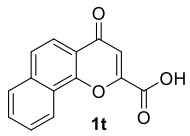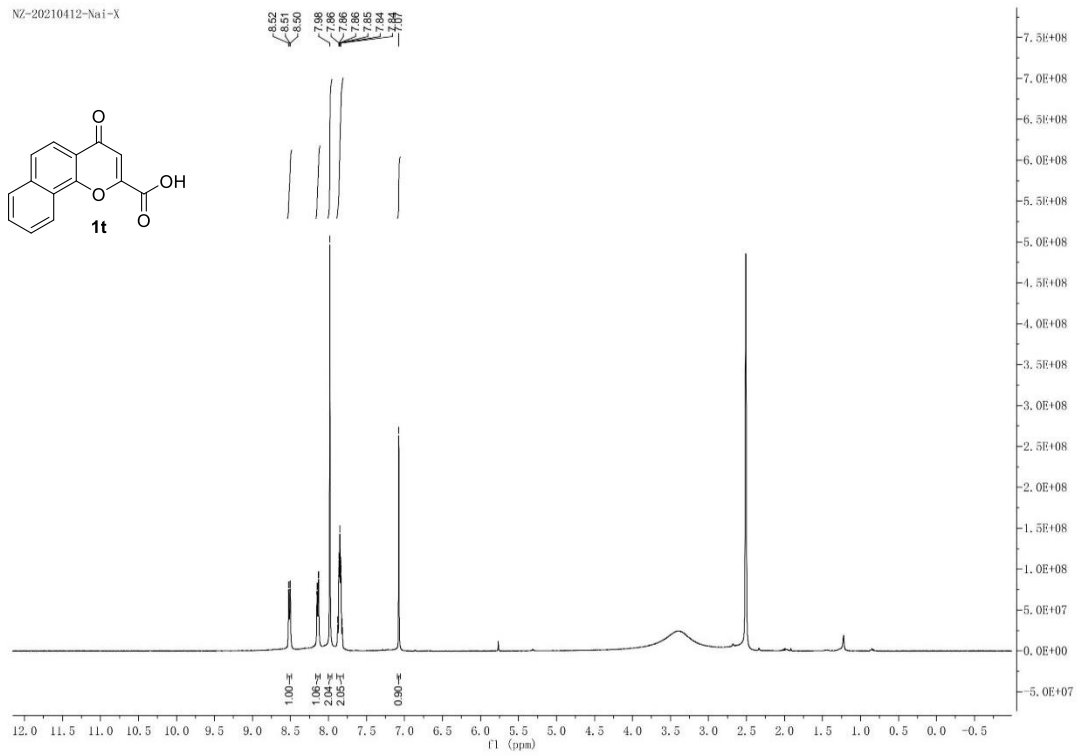

NZ-20211114-1t-C13  
NZ-20211114-1t-C13

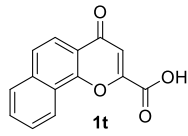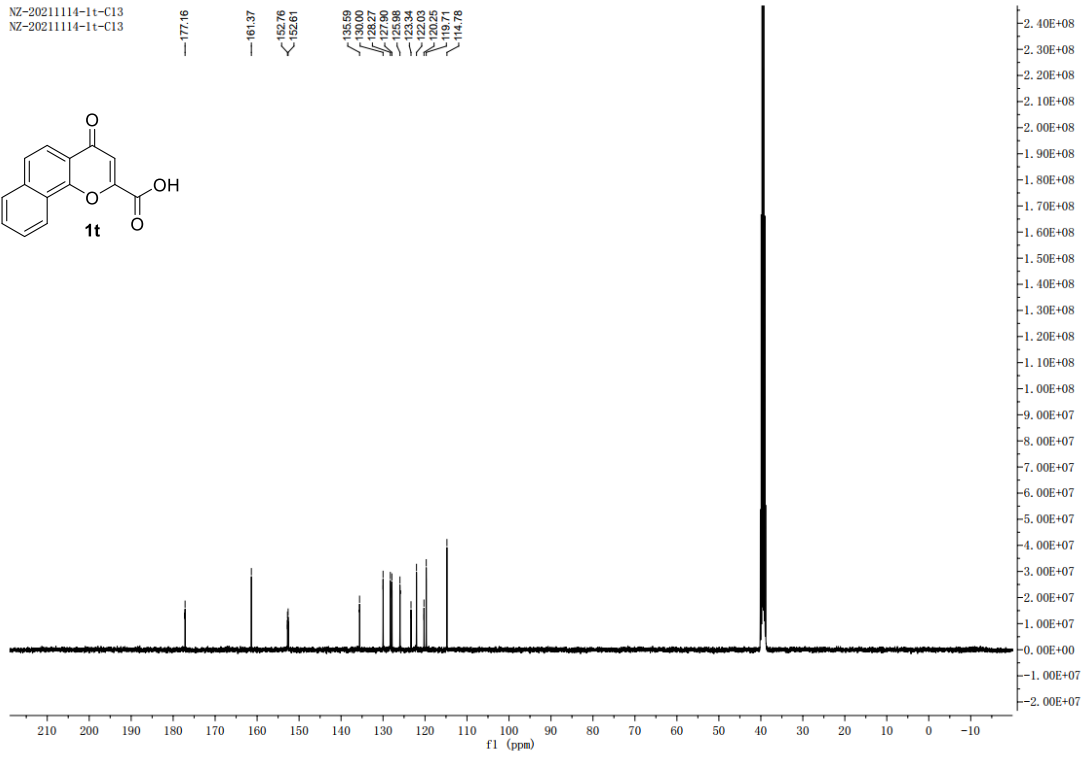

NZ-20220318-QUE

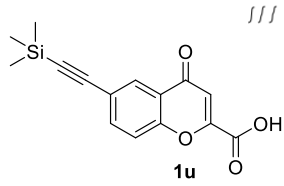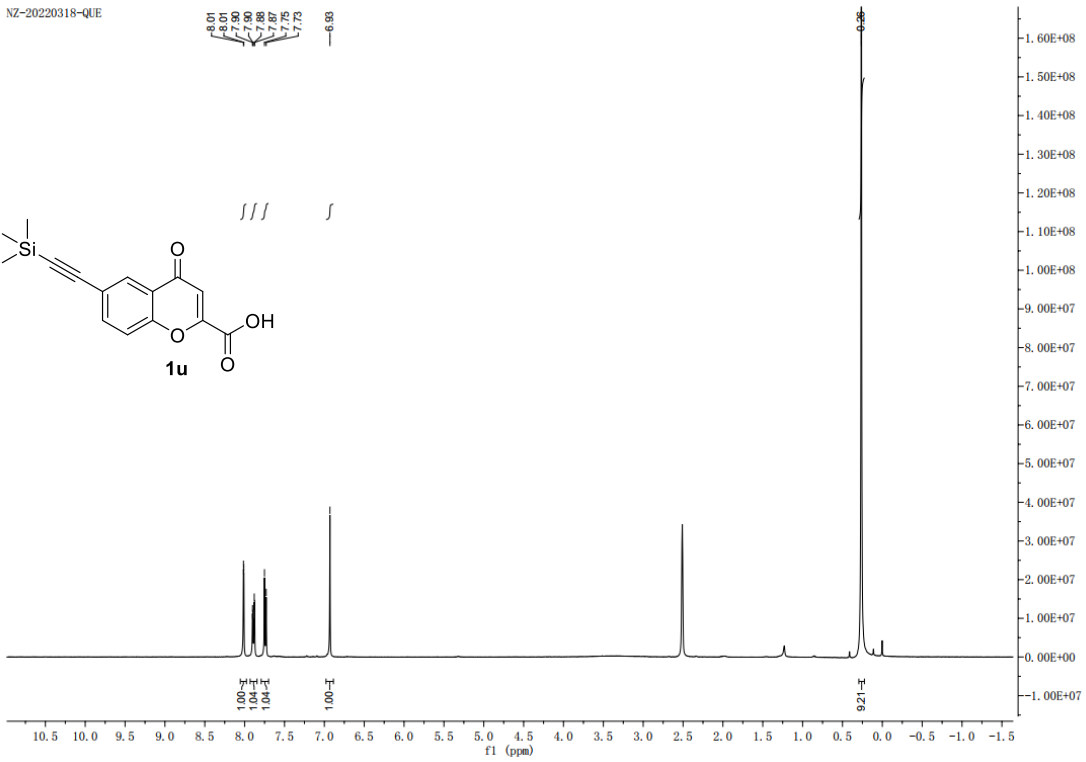

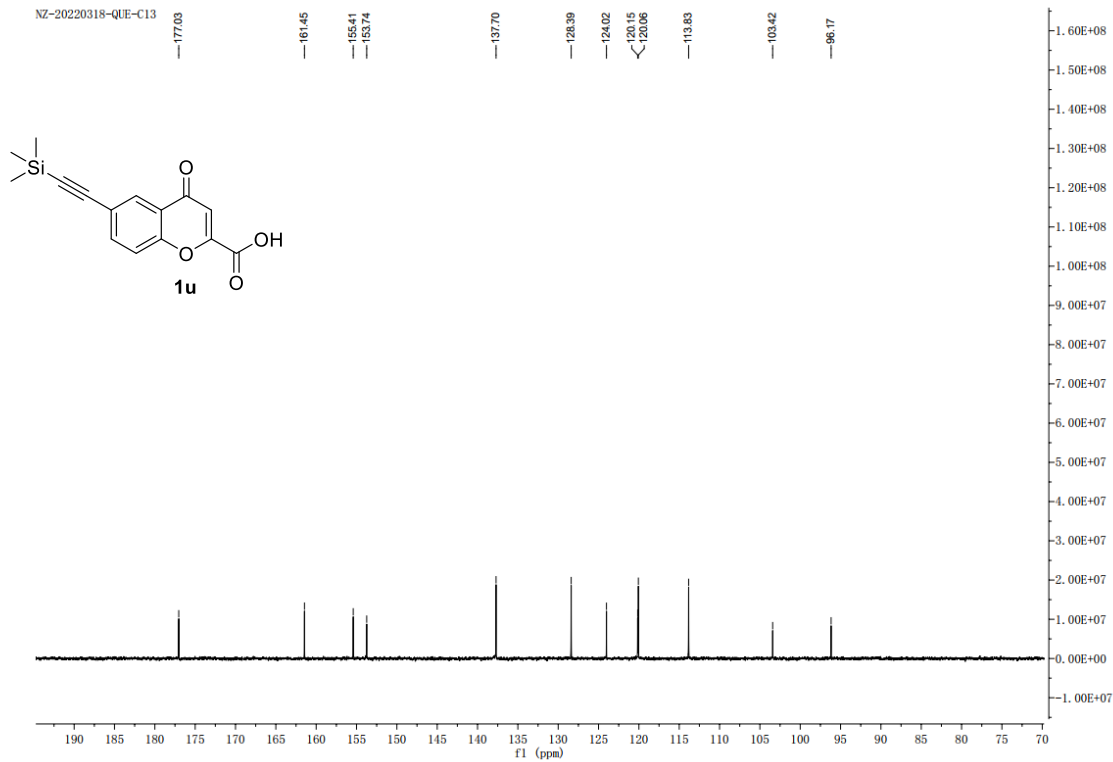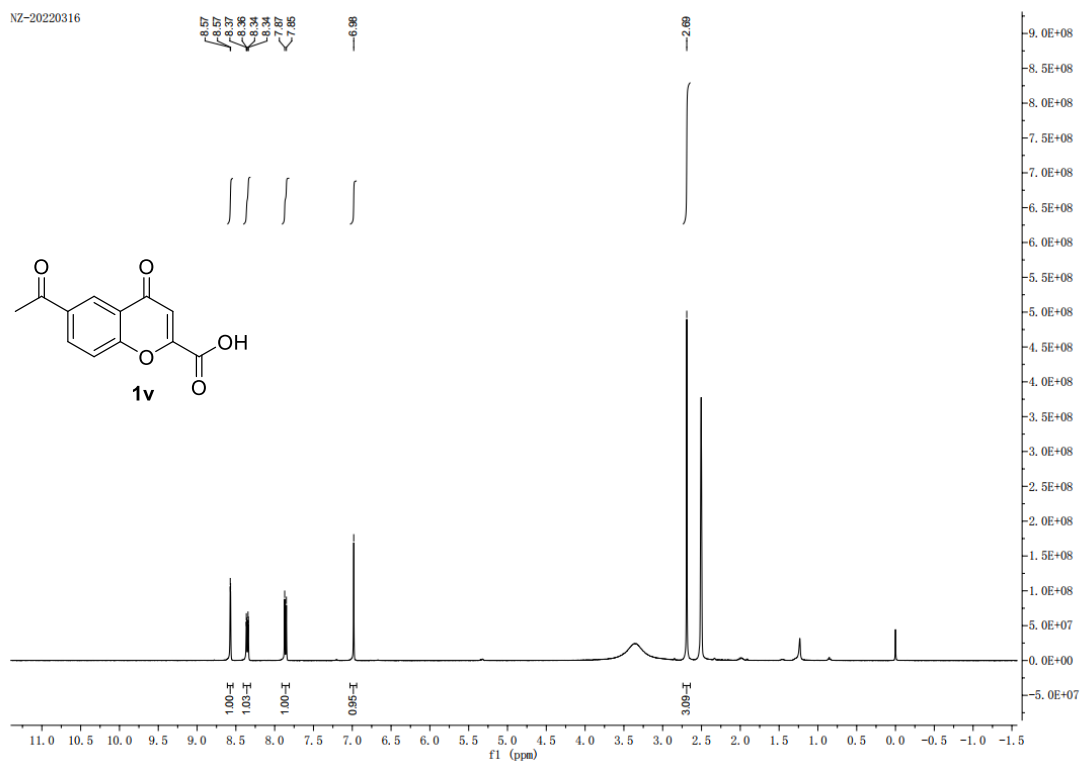

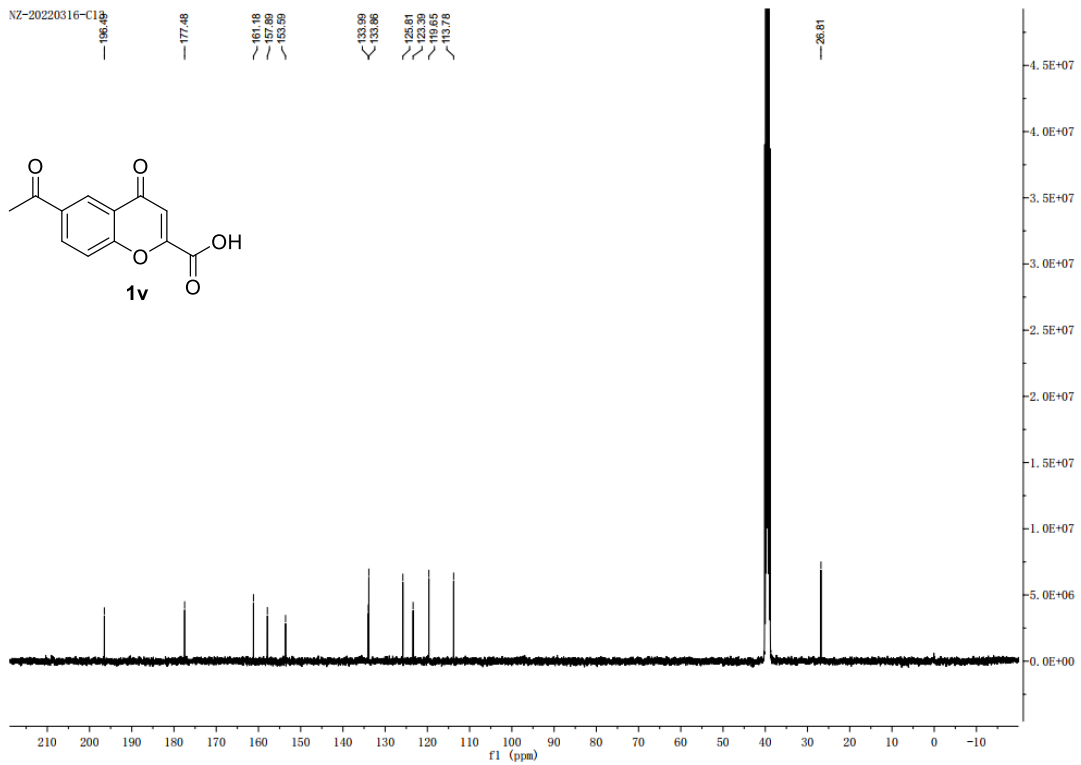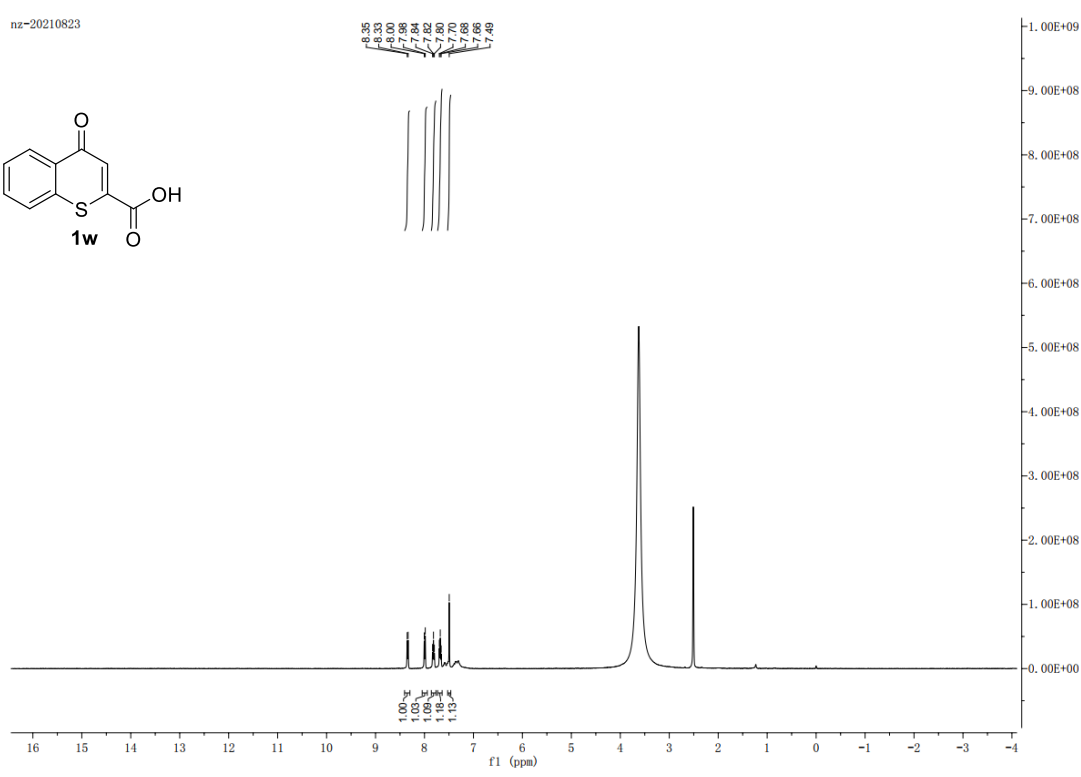



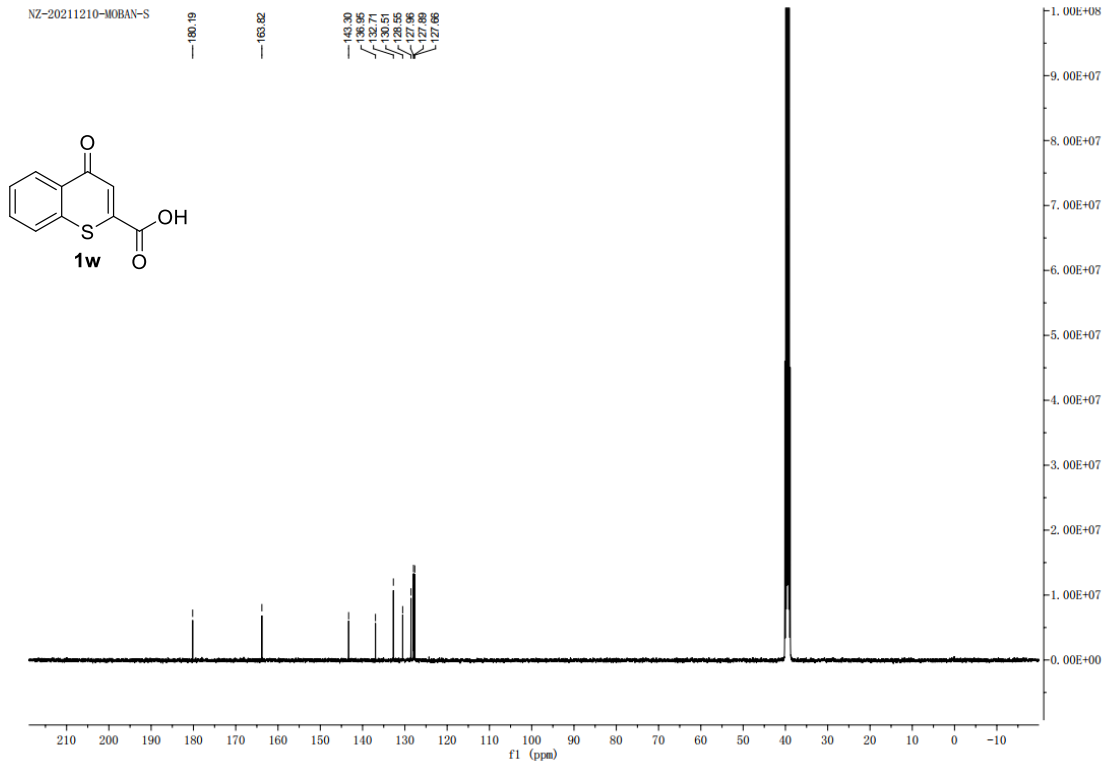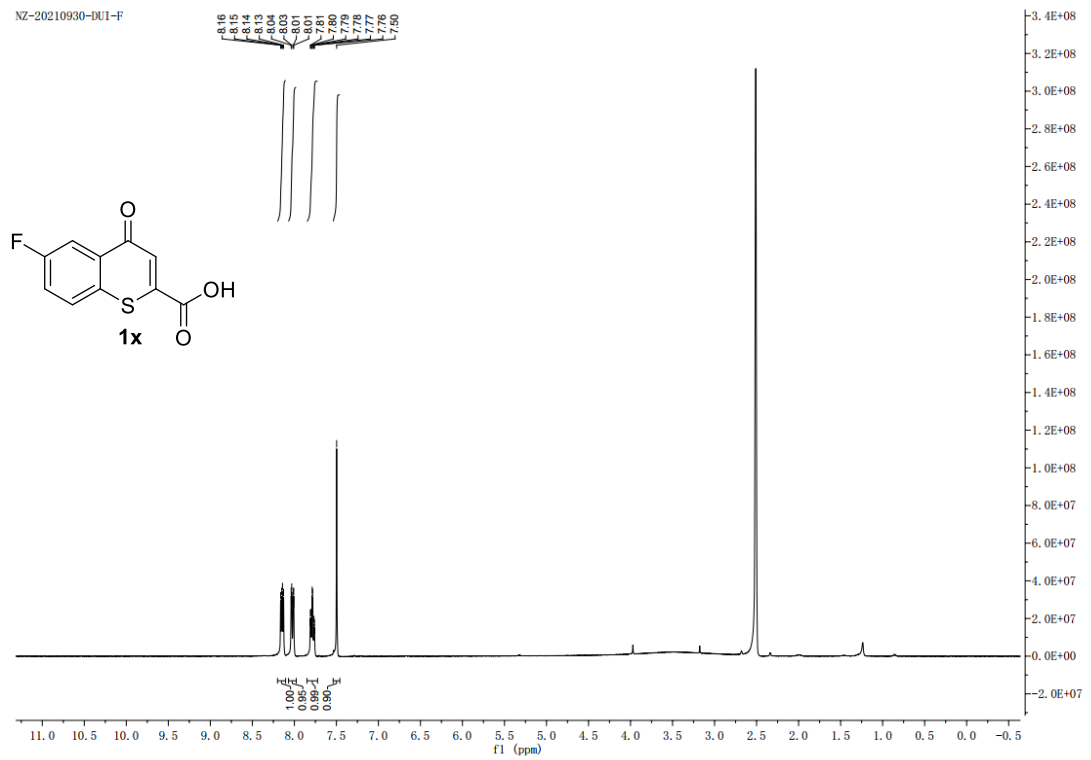

NZ-20211114-1v-C13  
NZ-20211114-1v-C13

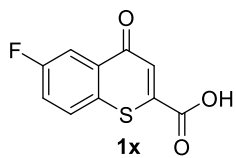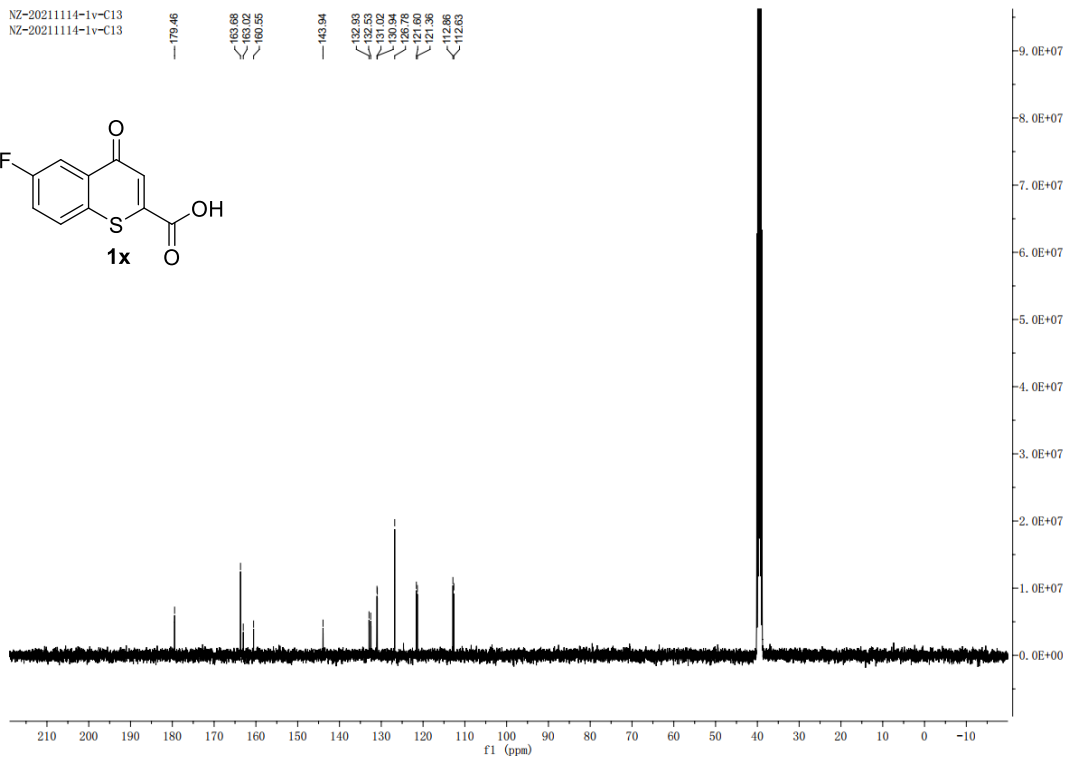

NZ-20210930-DUI-F-F

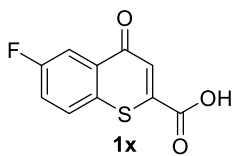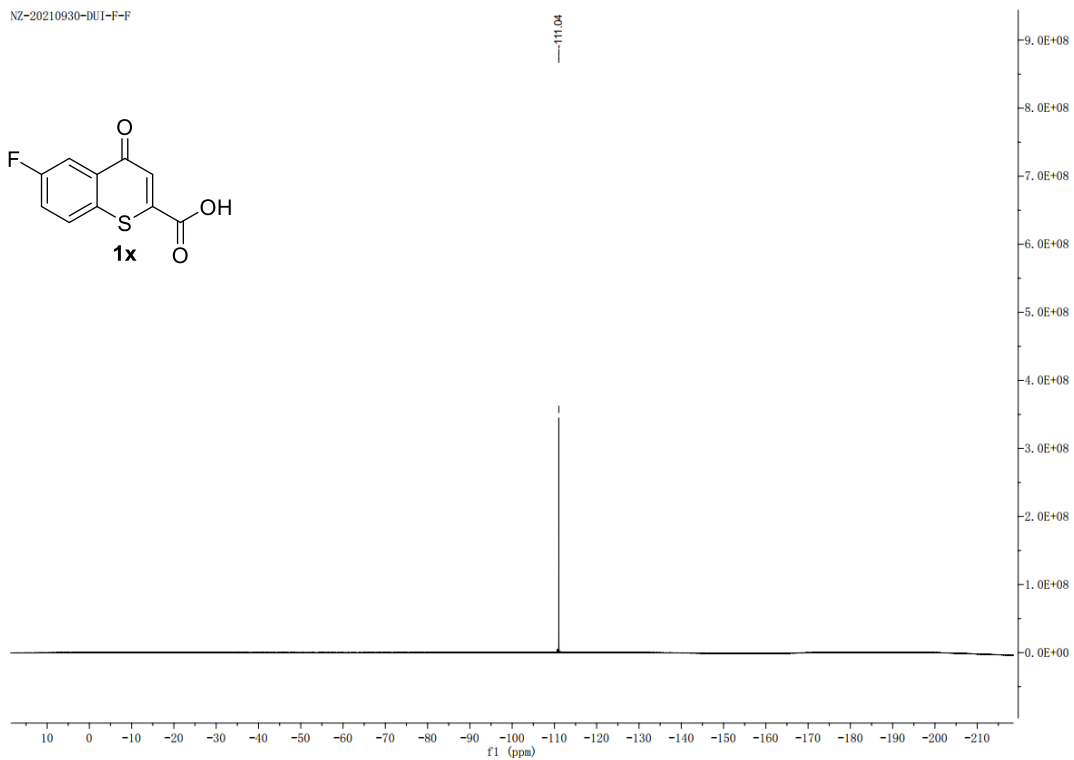

NZ-20211025-6

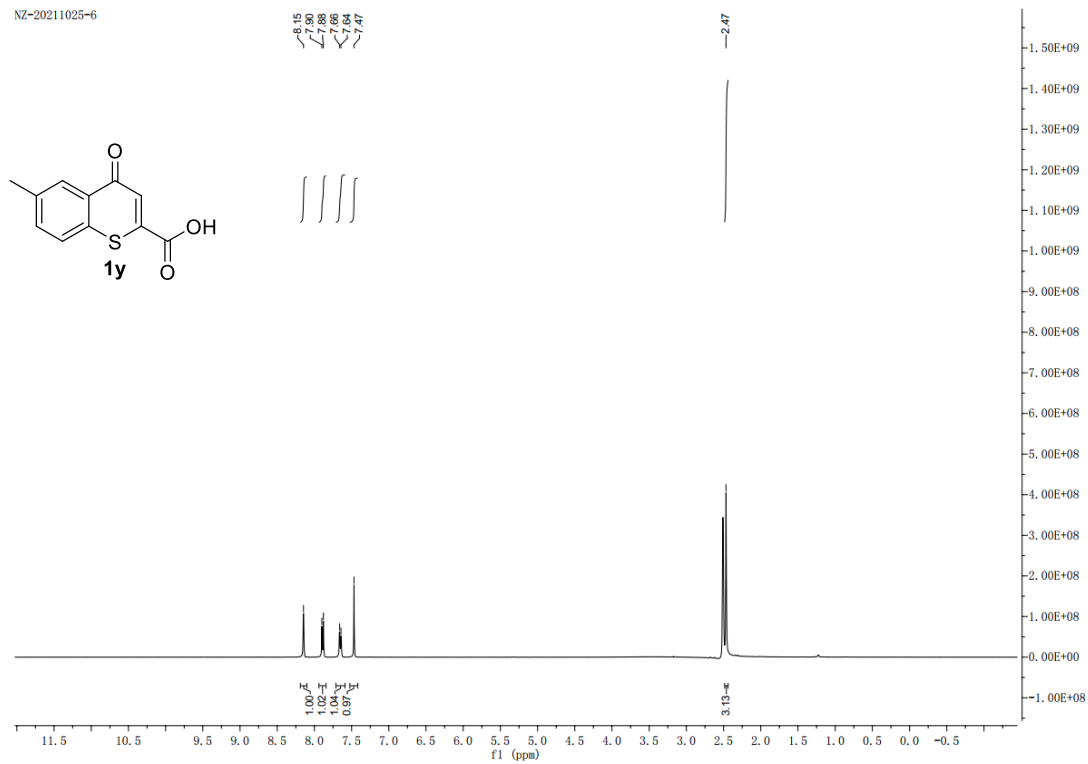

NZ-20211114-1w-C13  
NZ-20211114-1w-C13

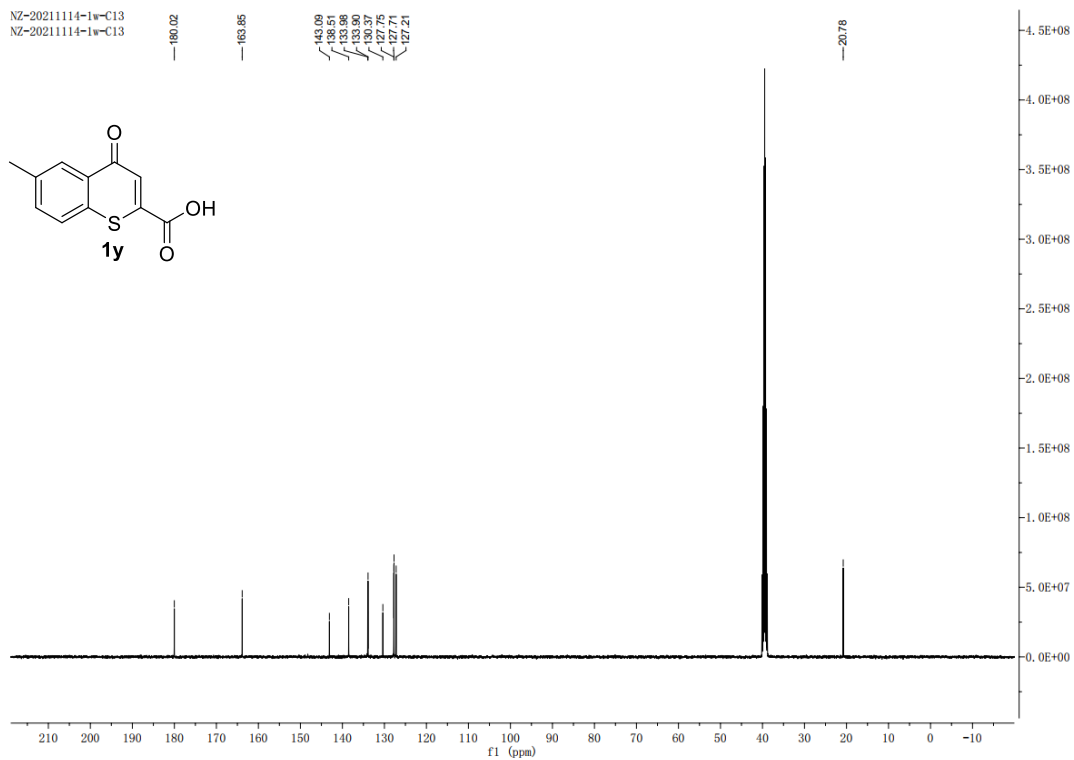

## 8.2 NMR Spectra of the chiral products

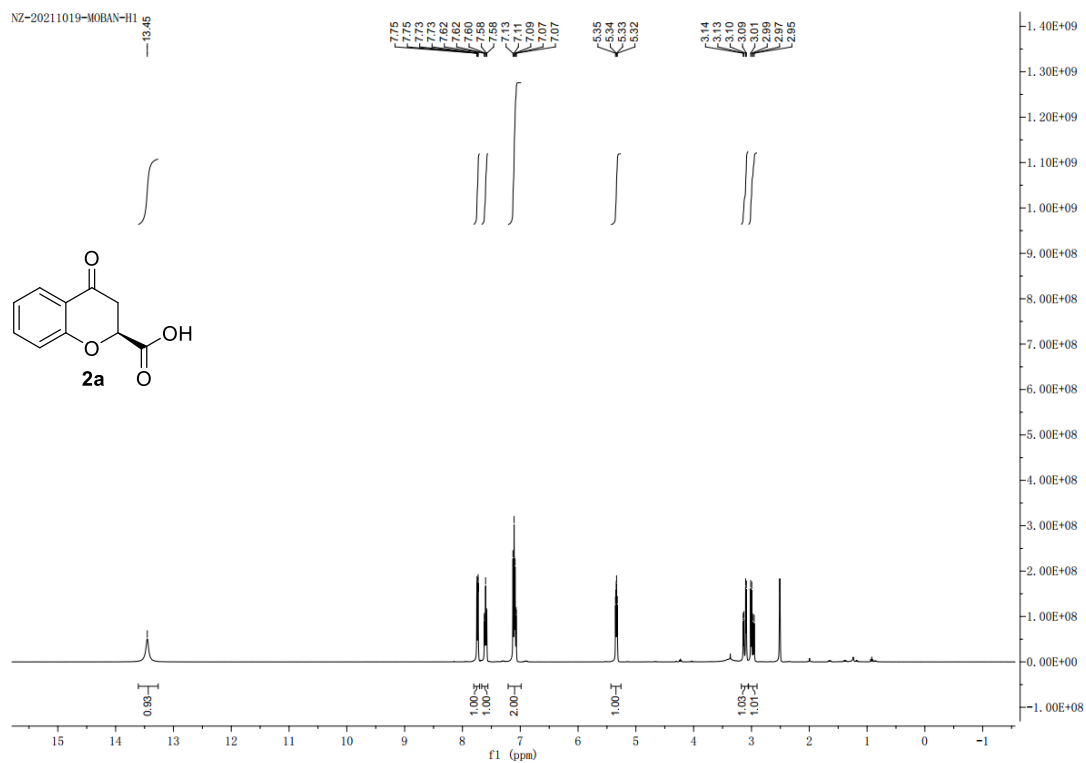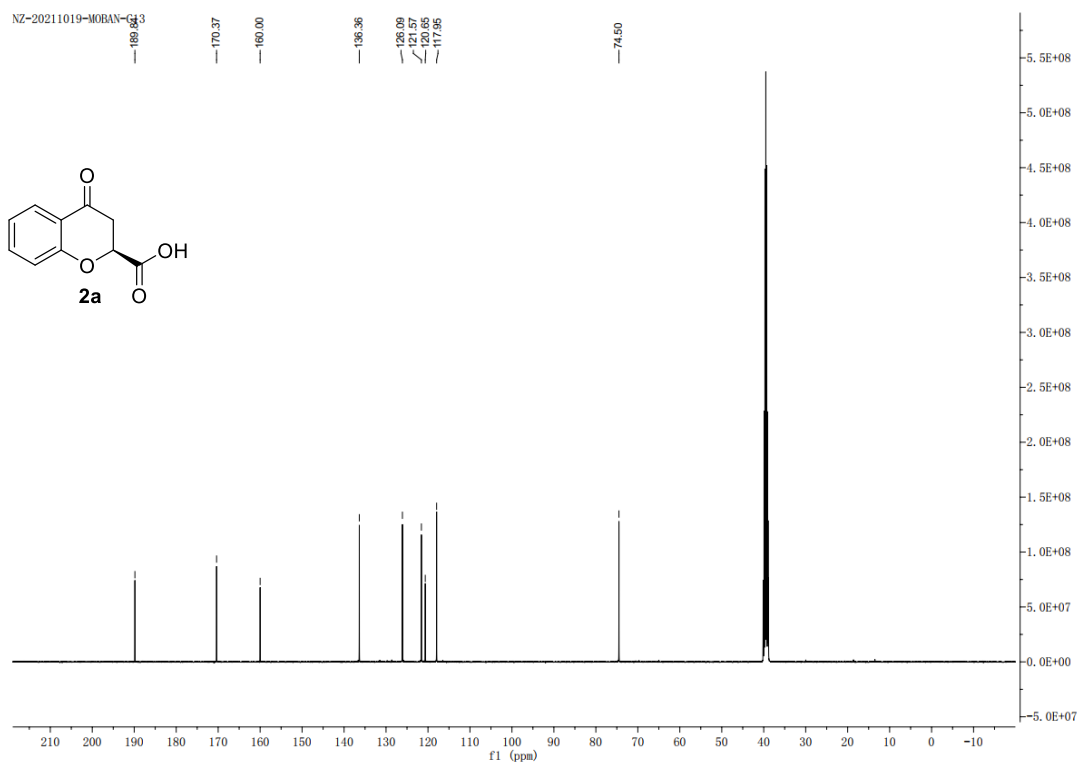

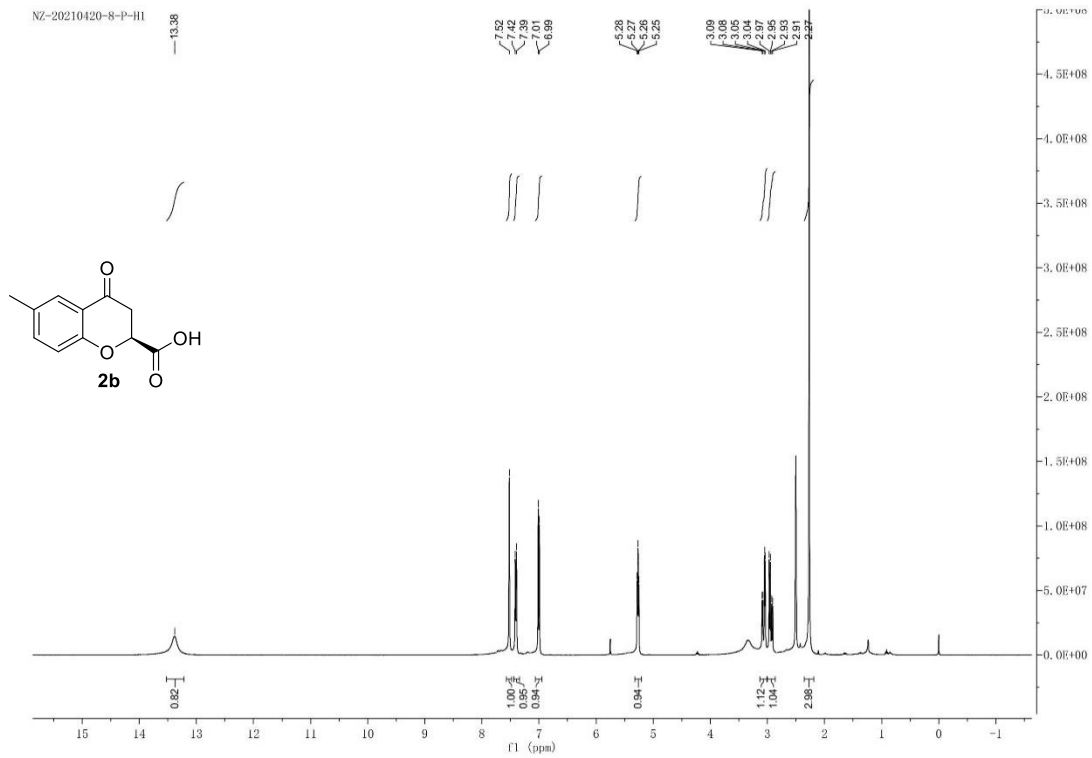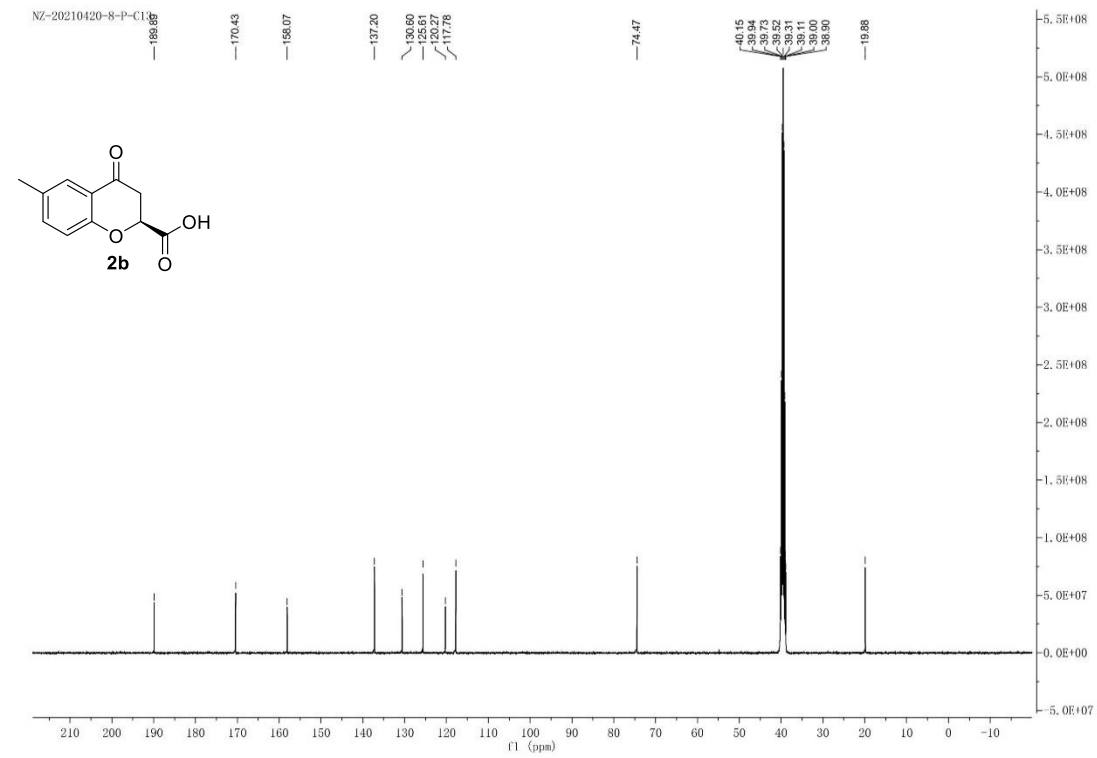

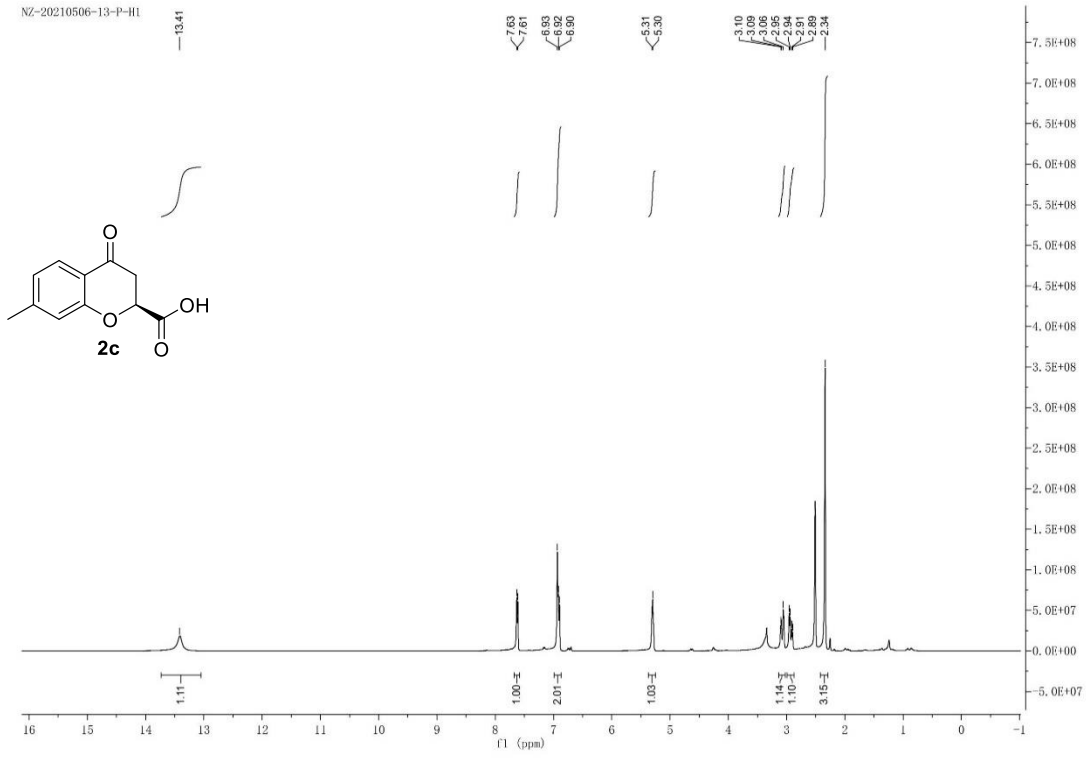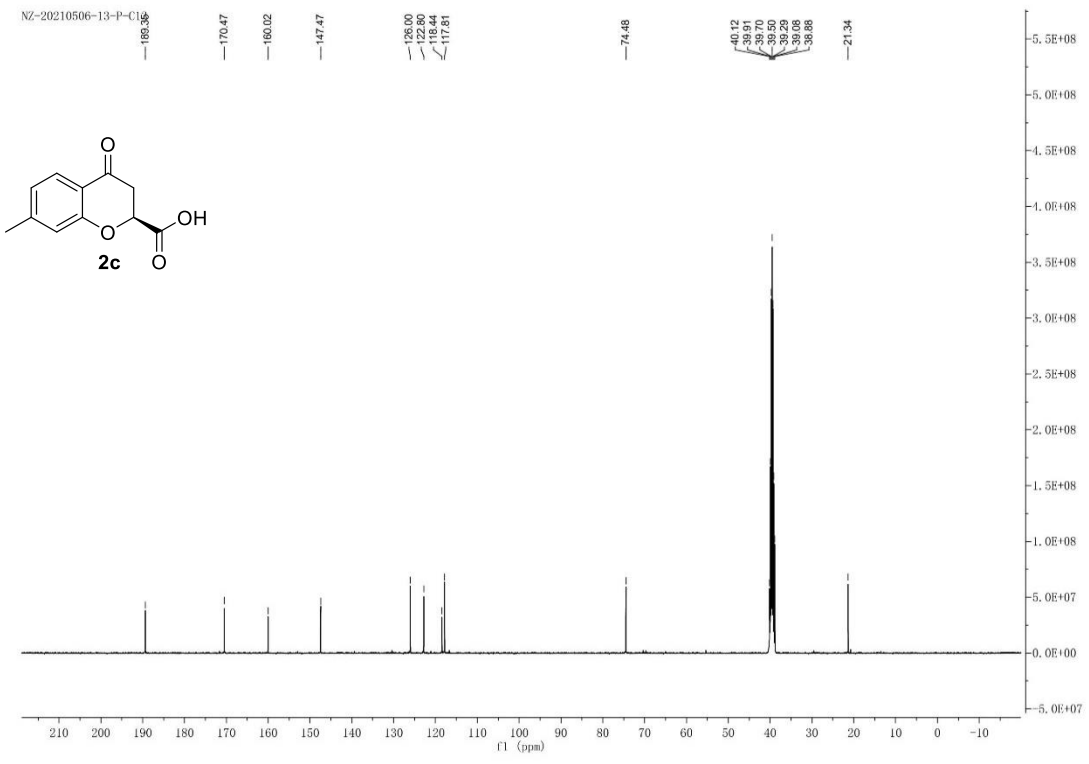

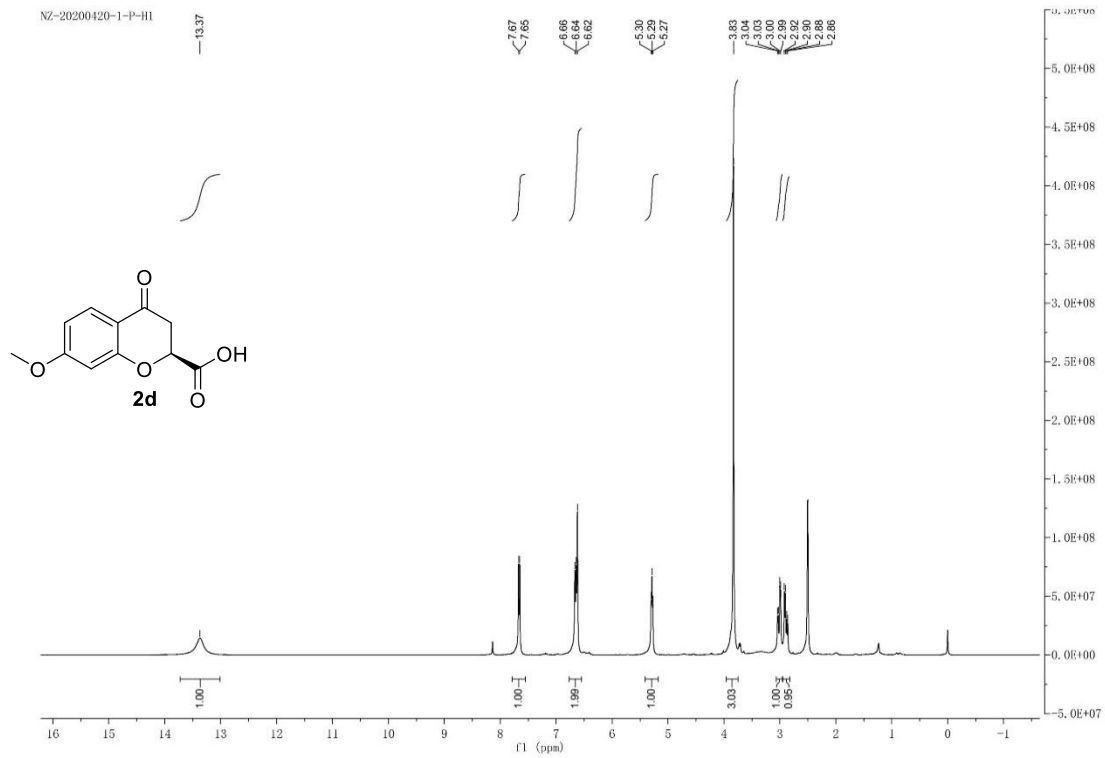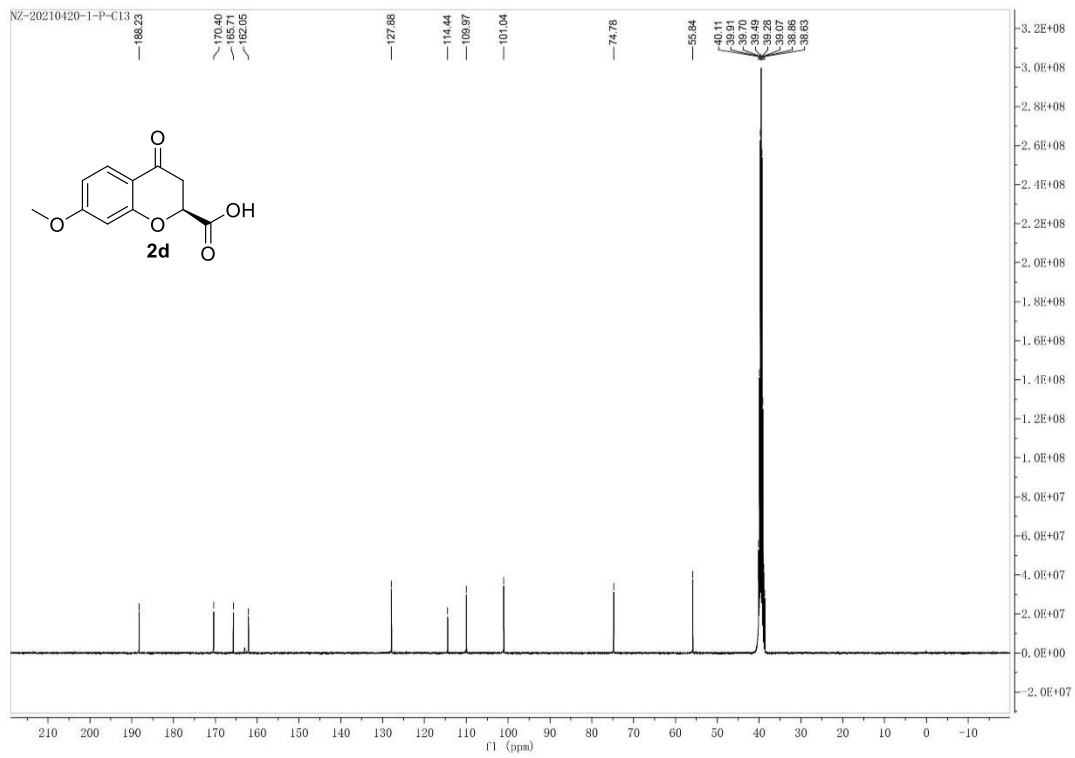

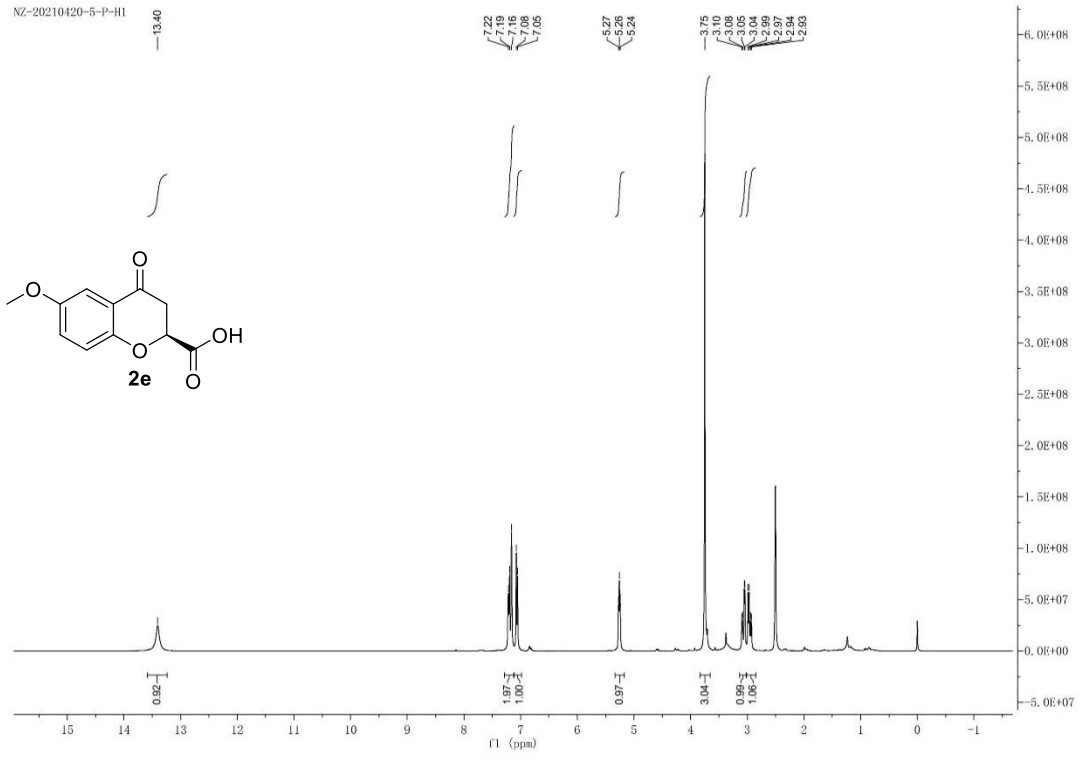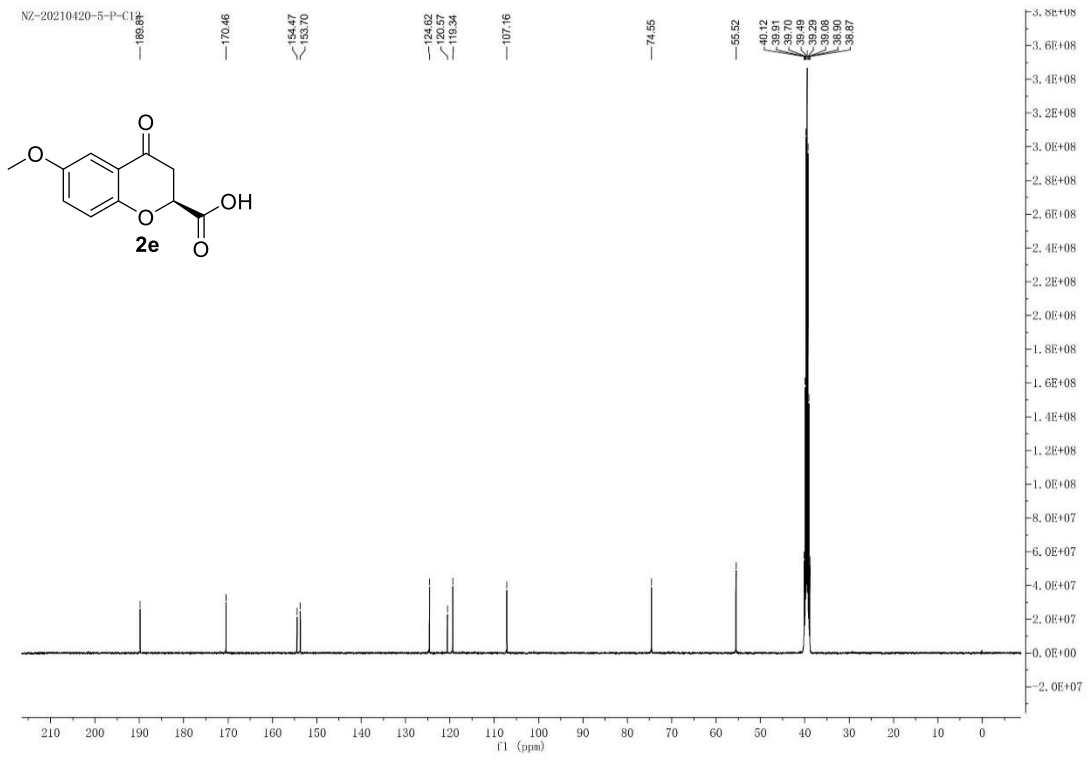



NZ-20210528-19-P-H1  
-13.41

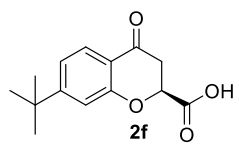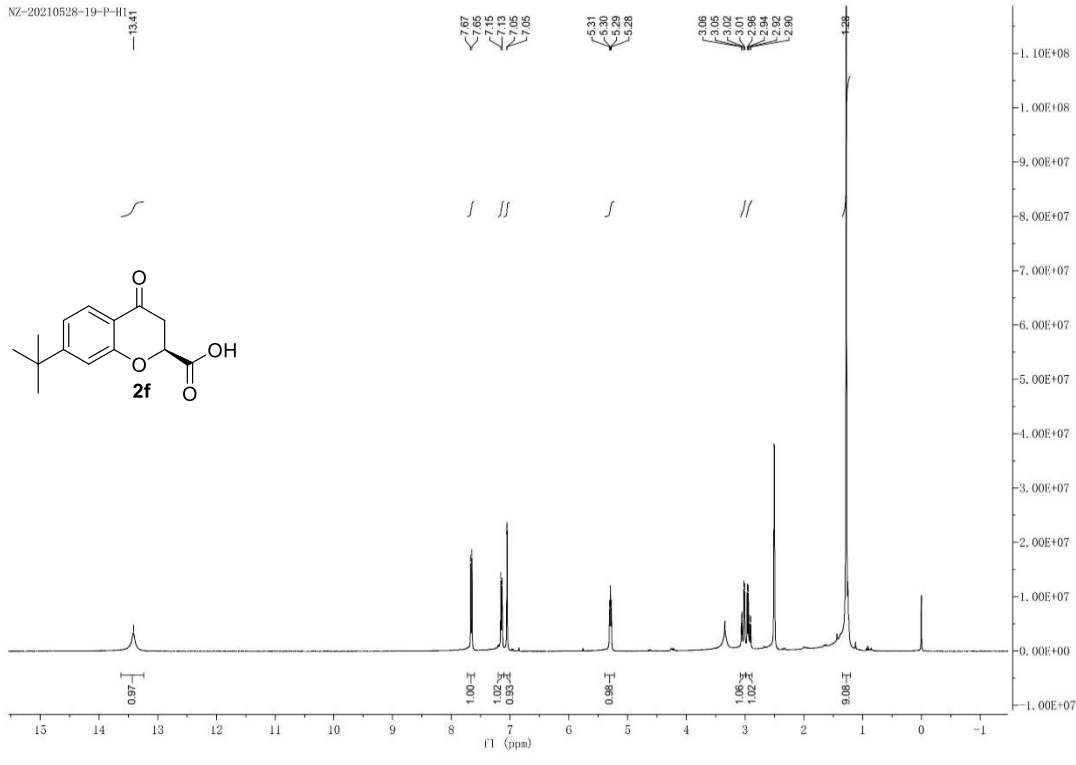

NZ-20210528-19-C13  
-189.45

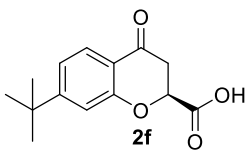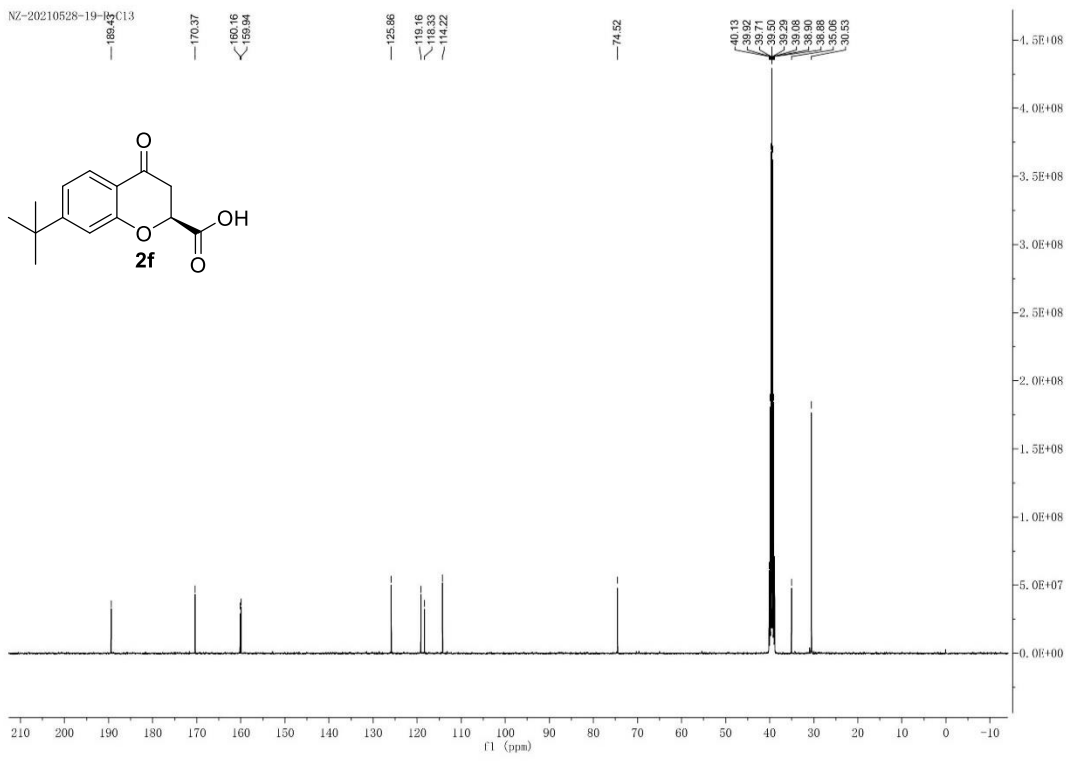

NZ-20210528-20-P-H1

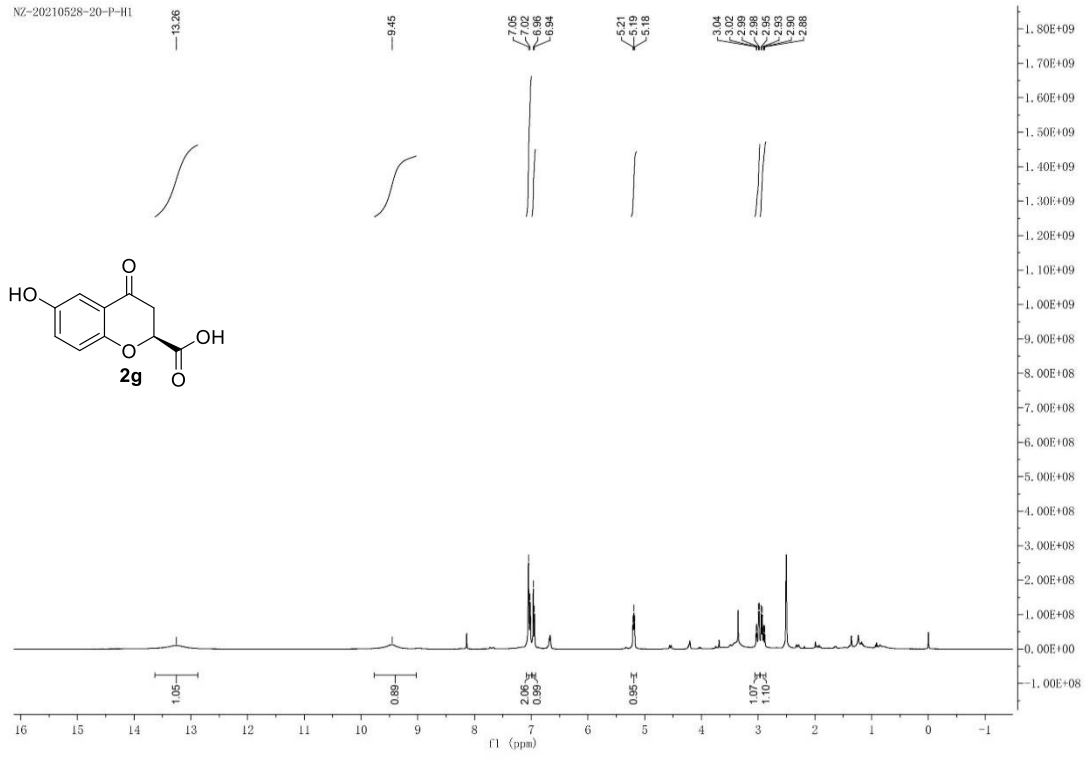

NZ-20211025-1

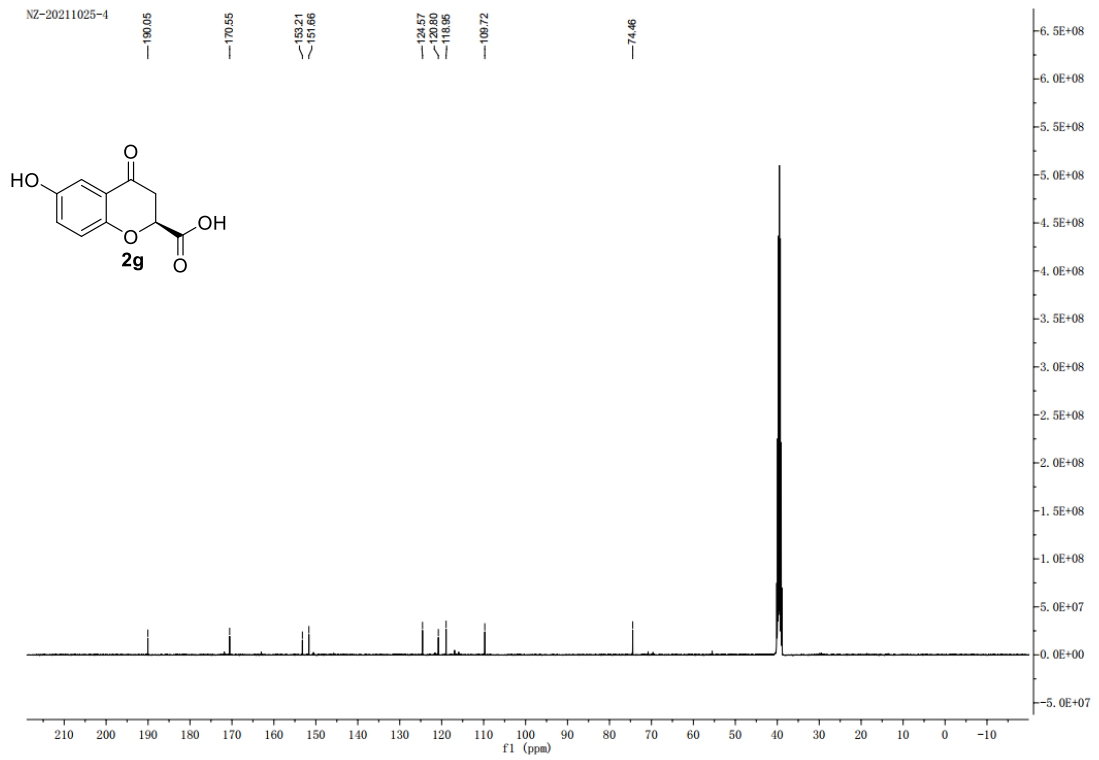

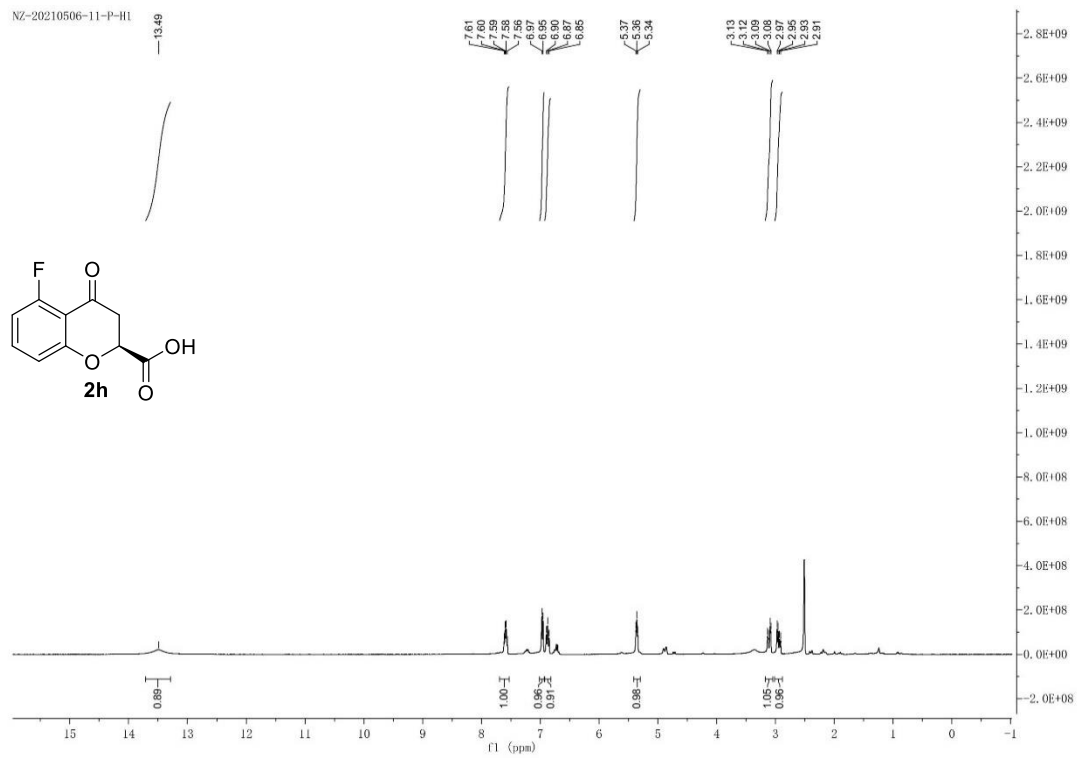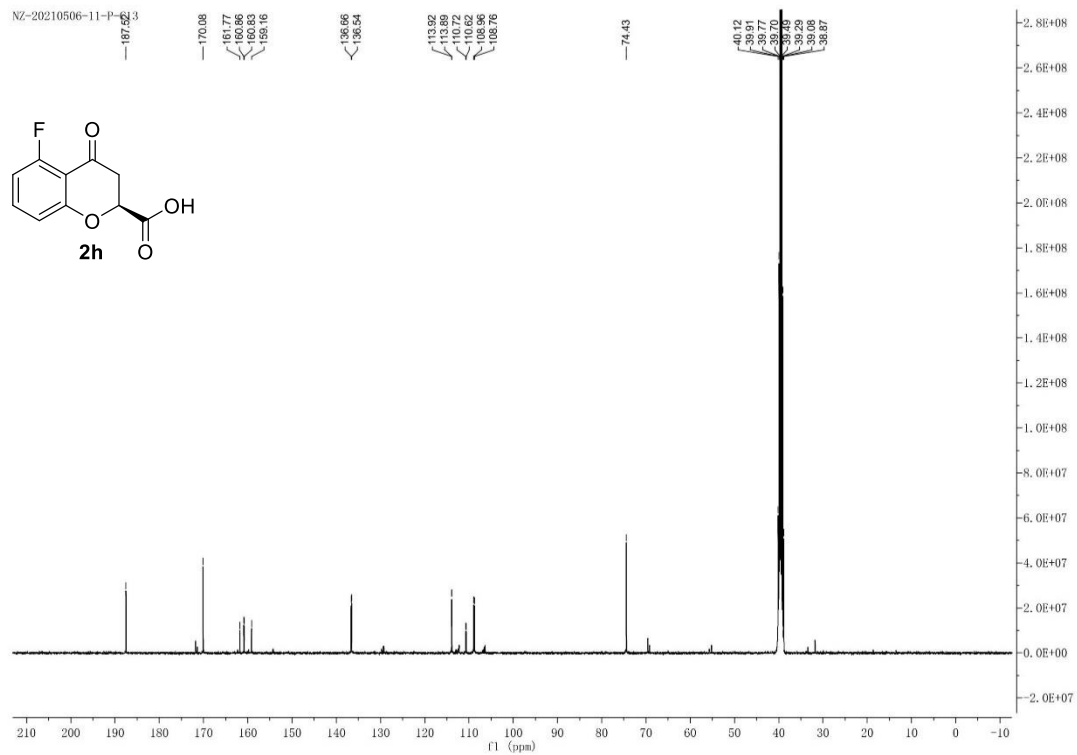

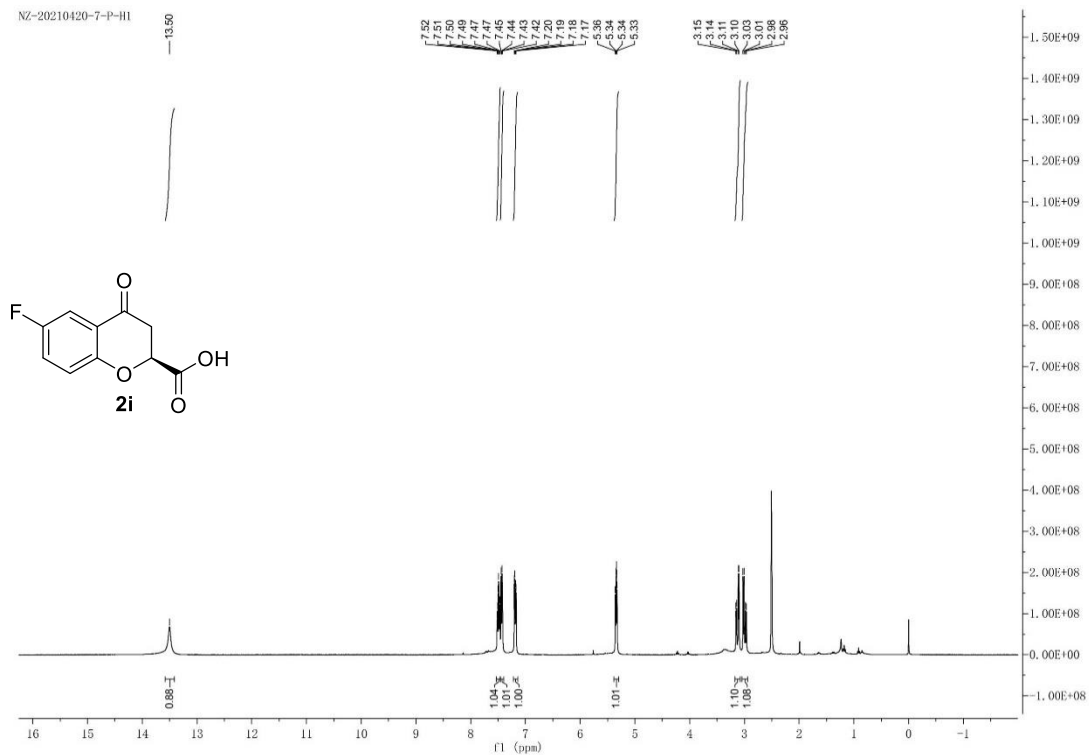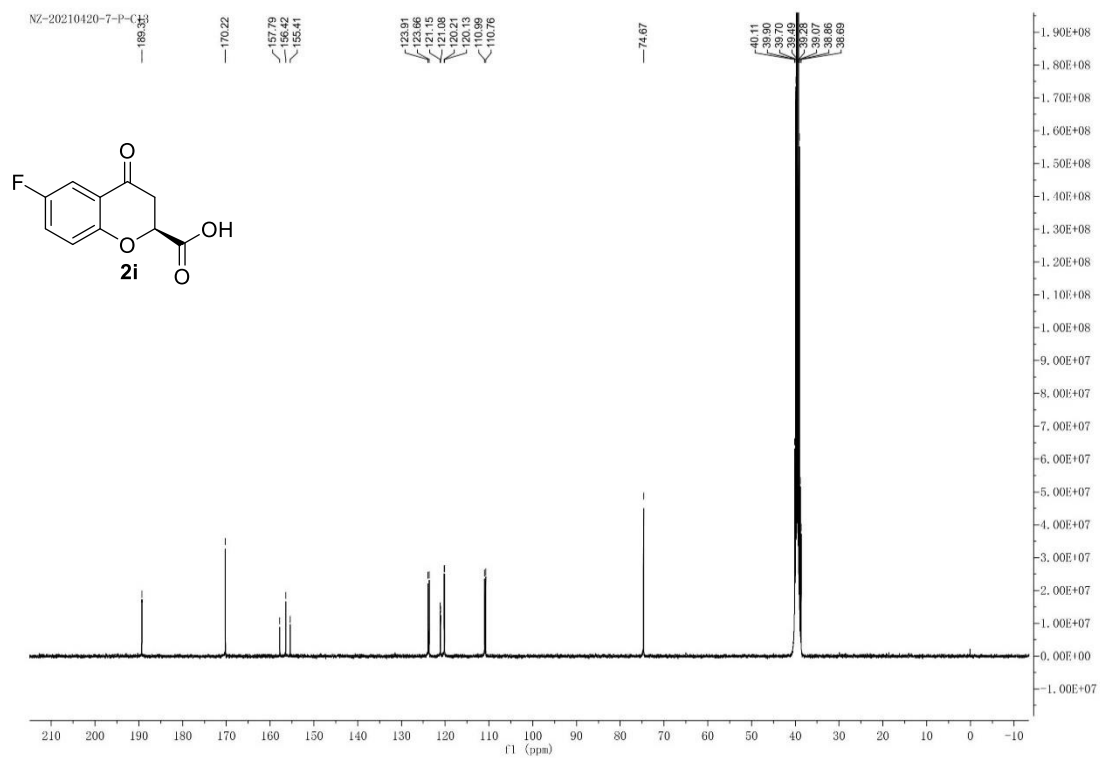

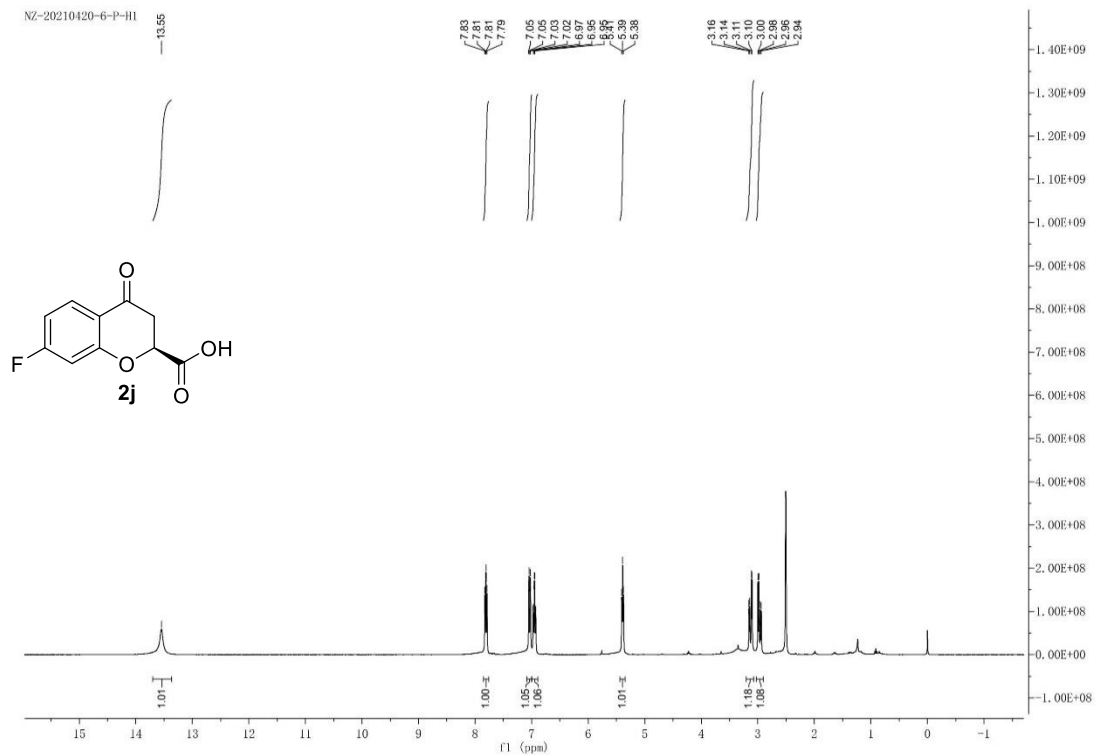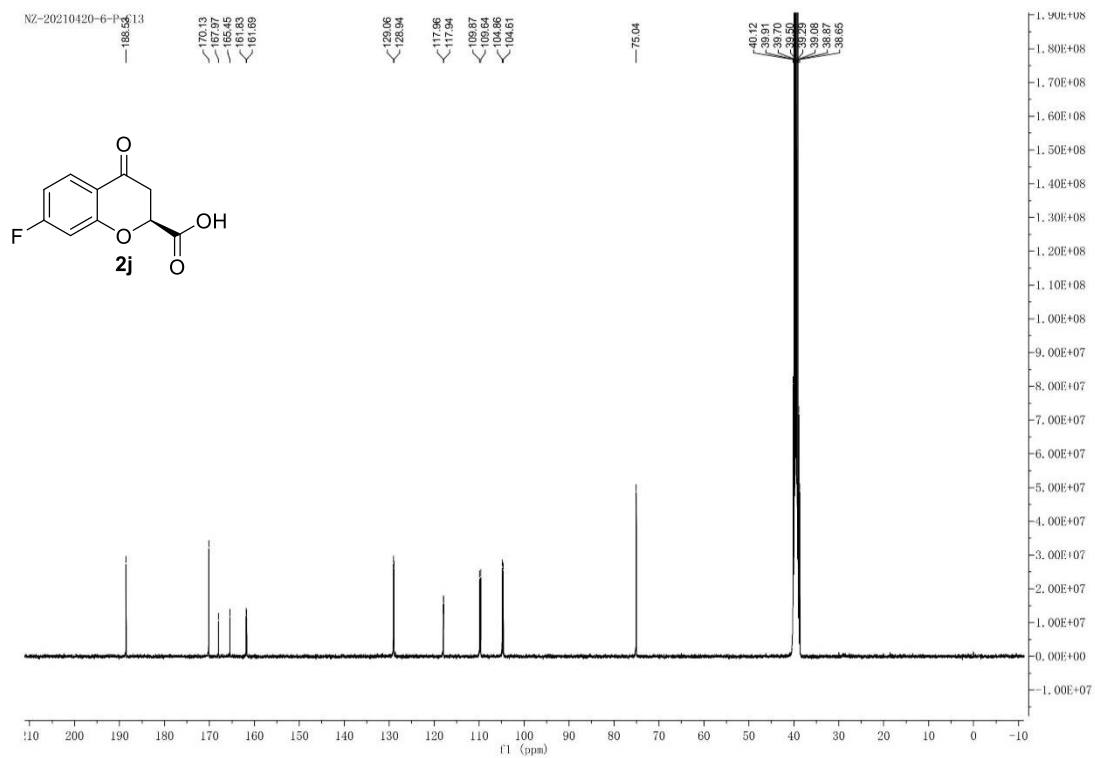

NZ-20210420-6-P-F

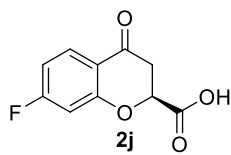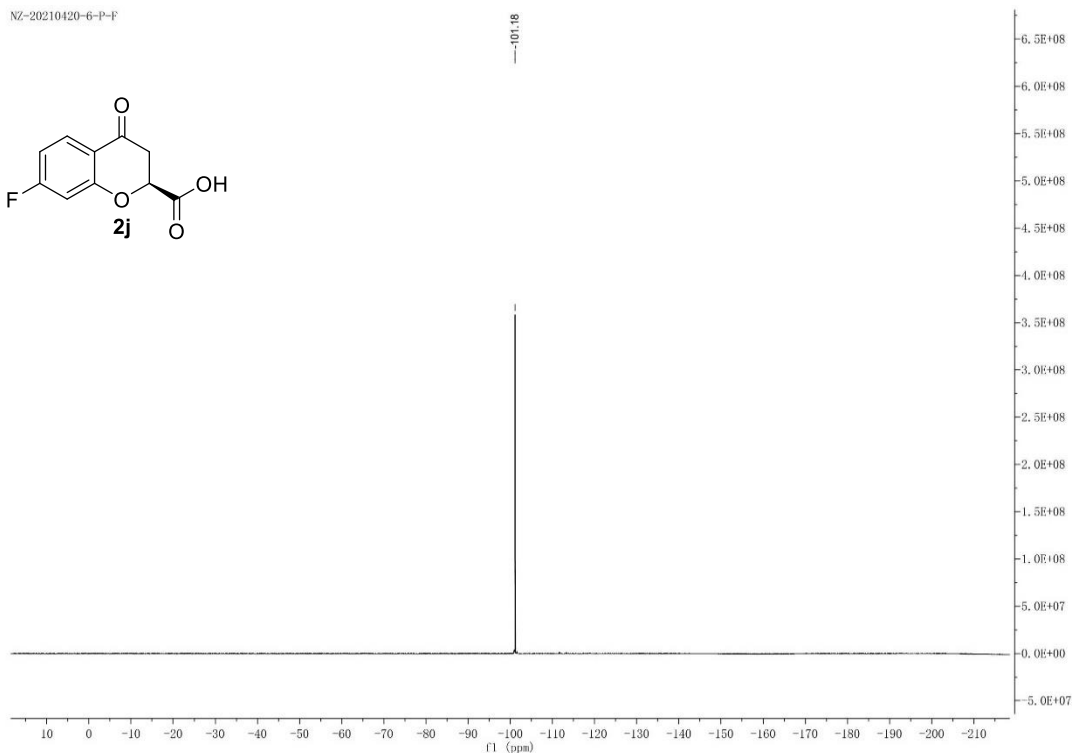

NZ-20210420-2-P-HI

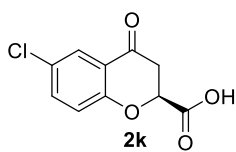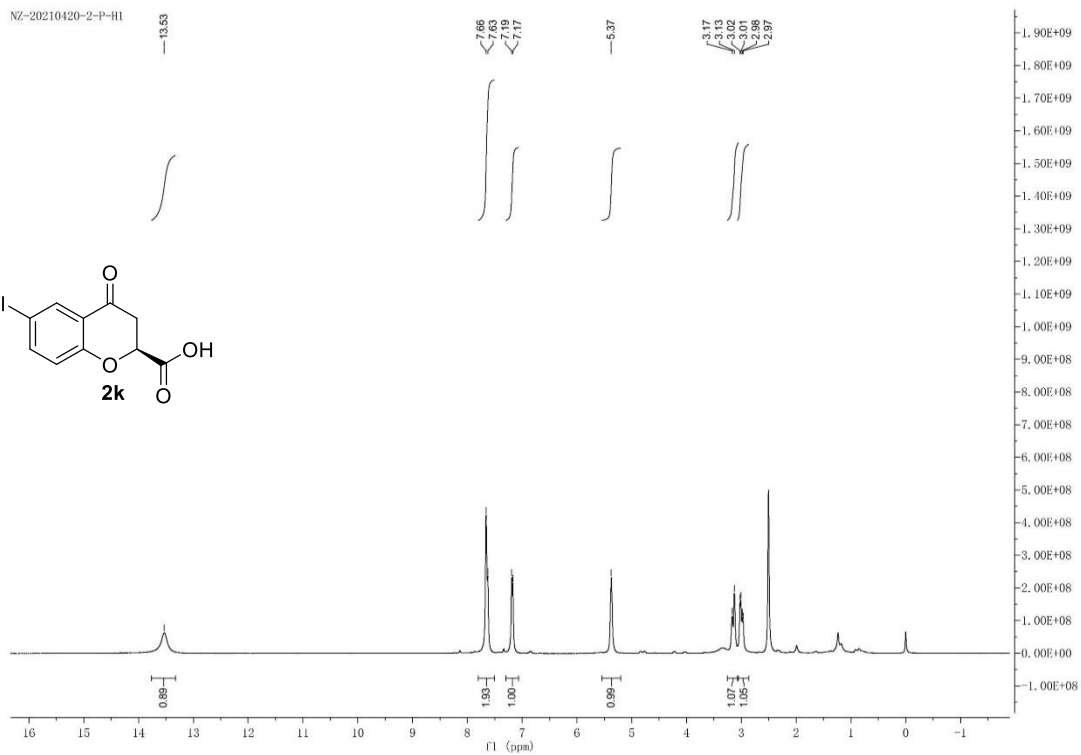

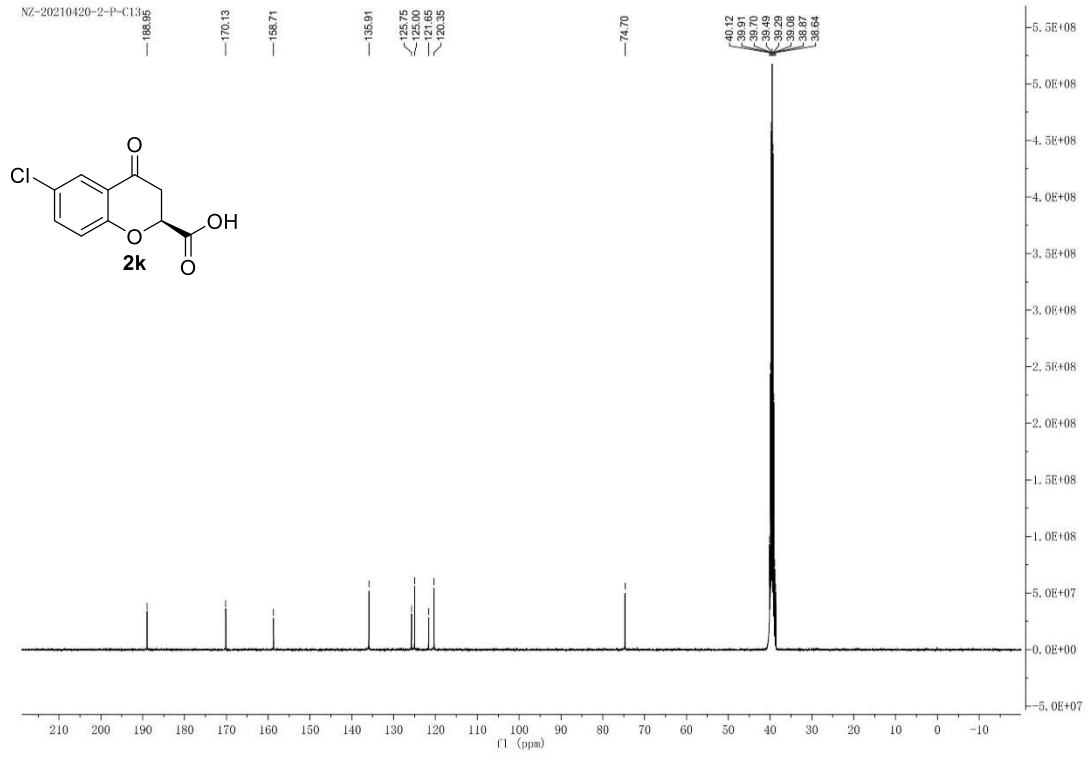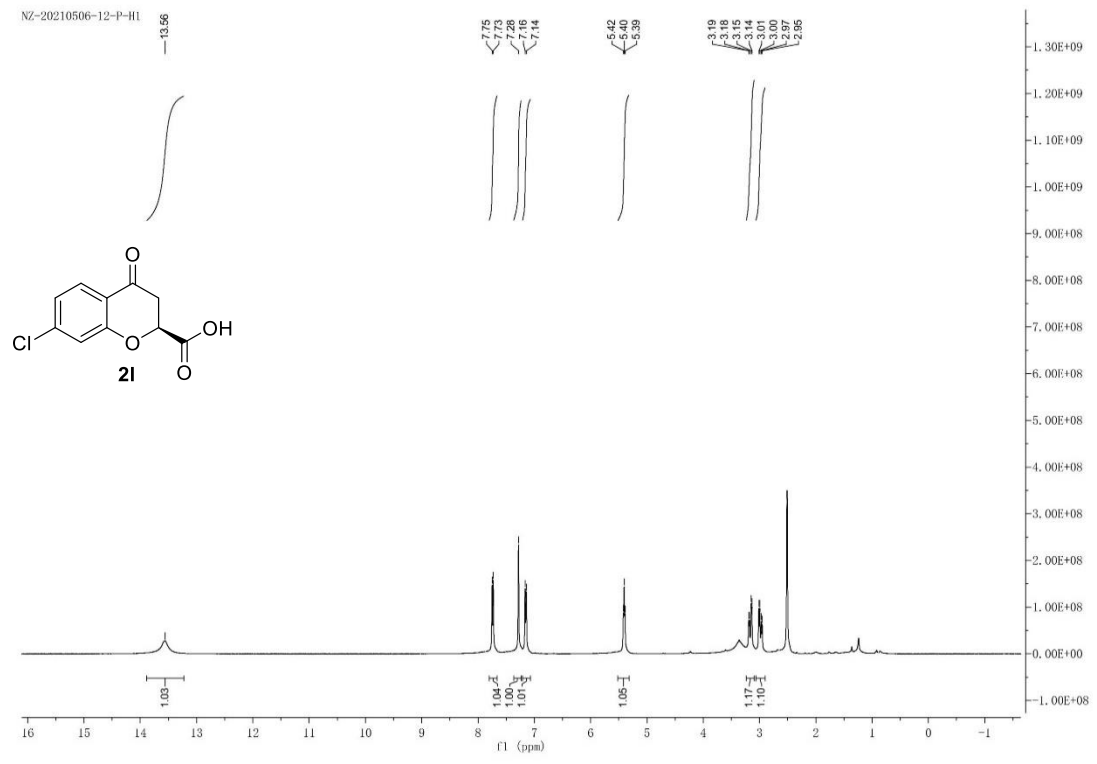

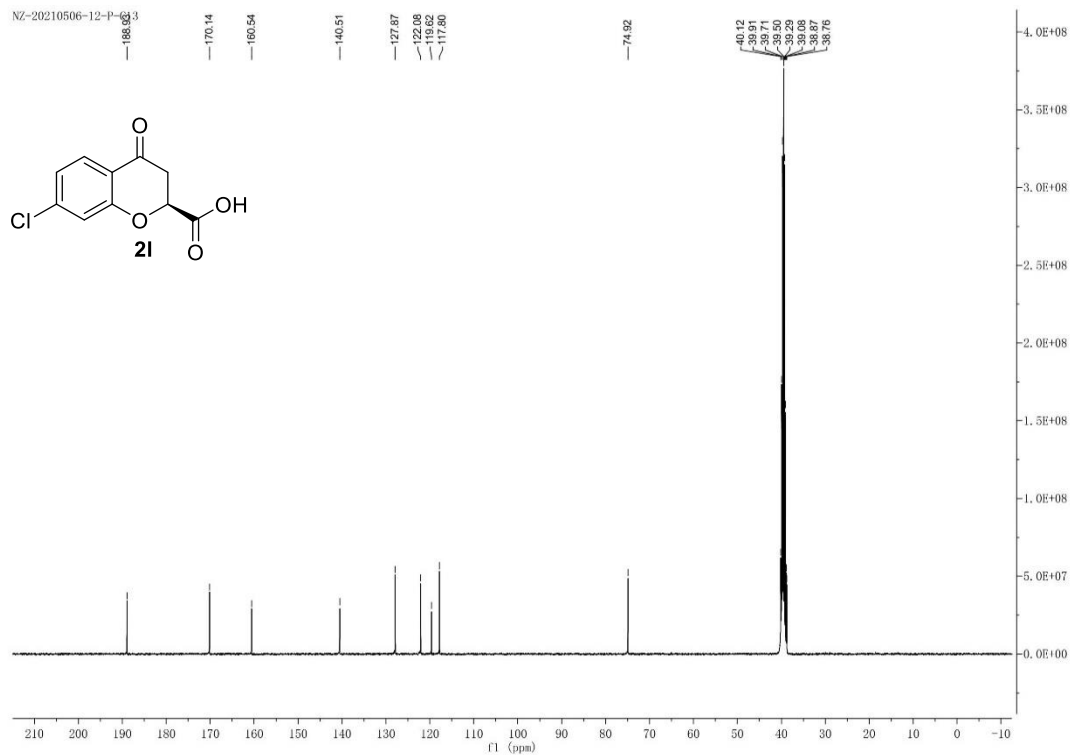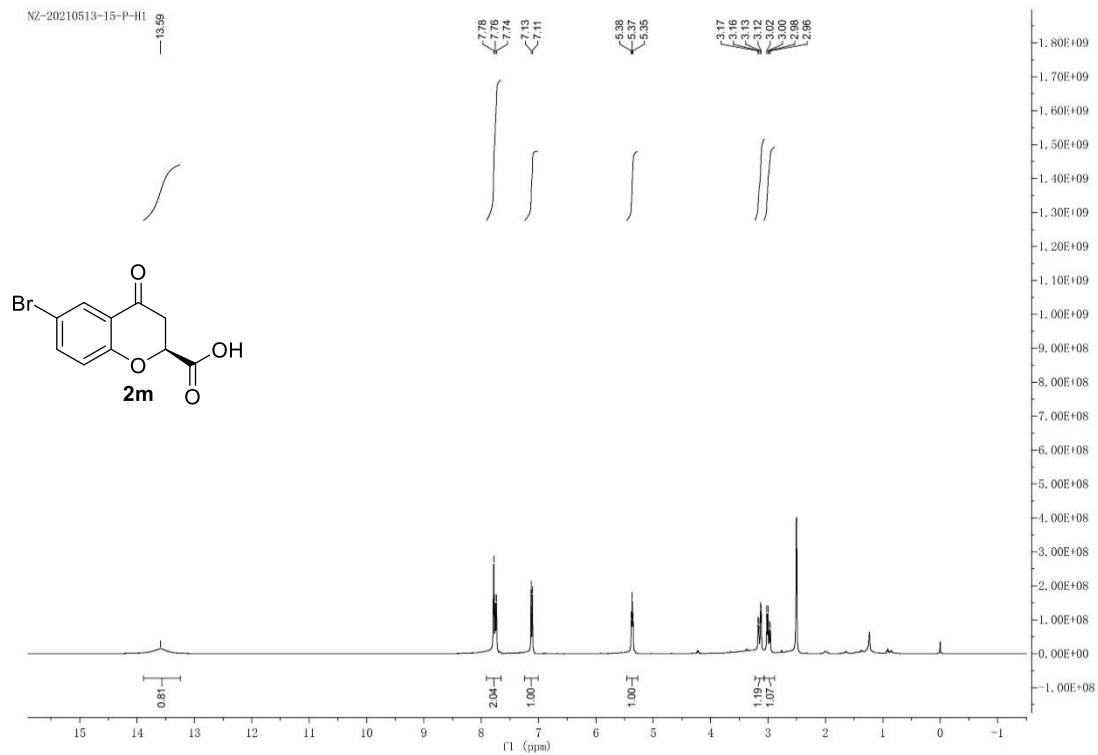



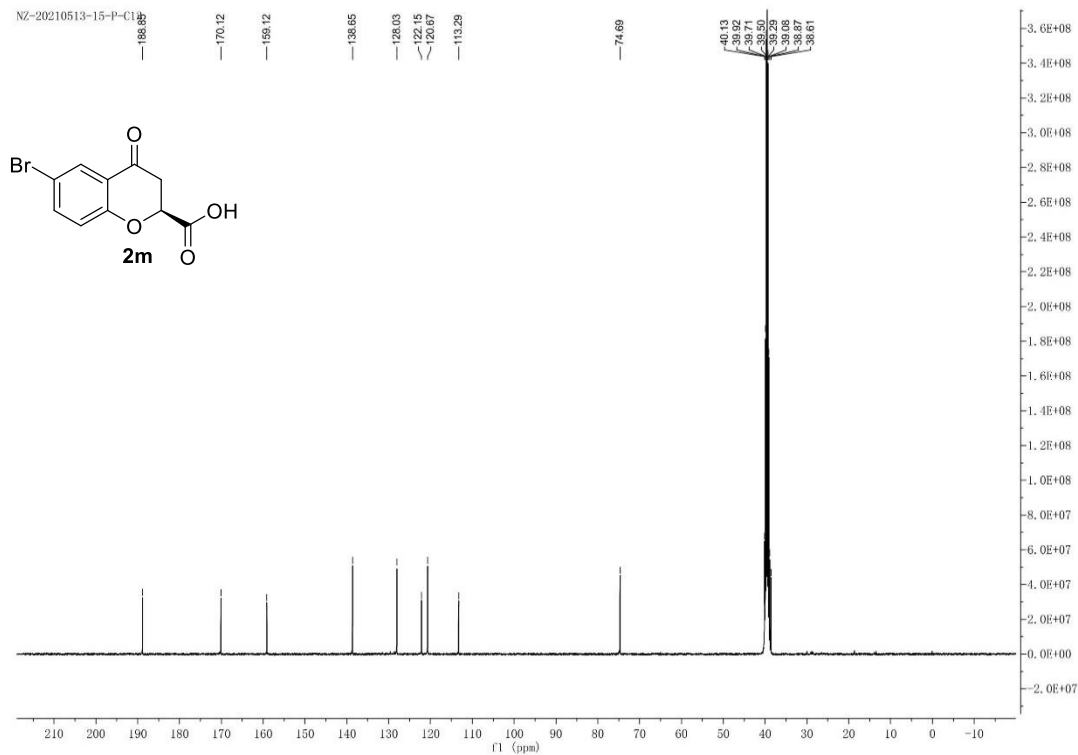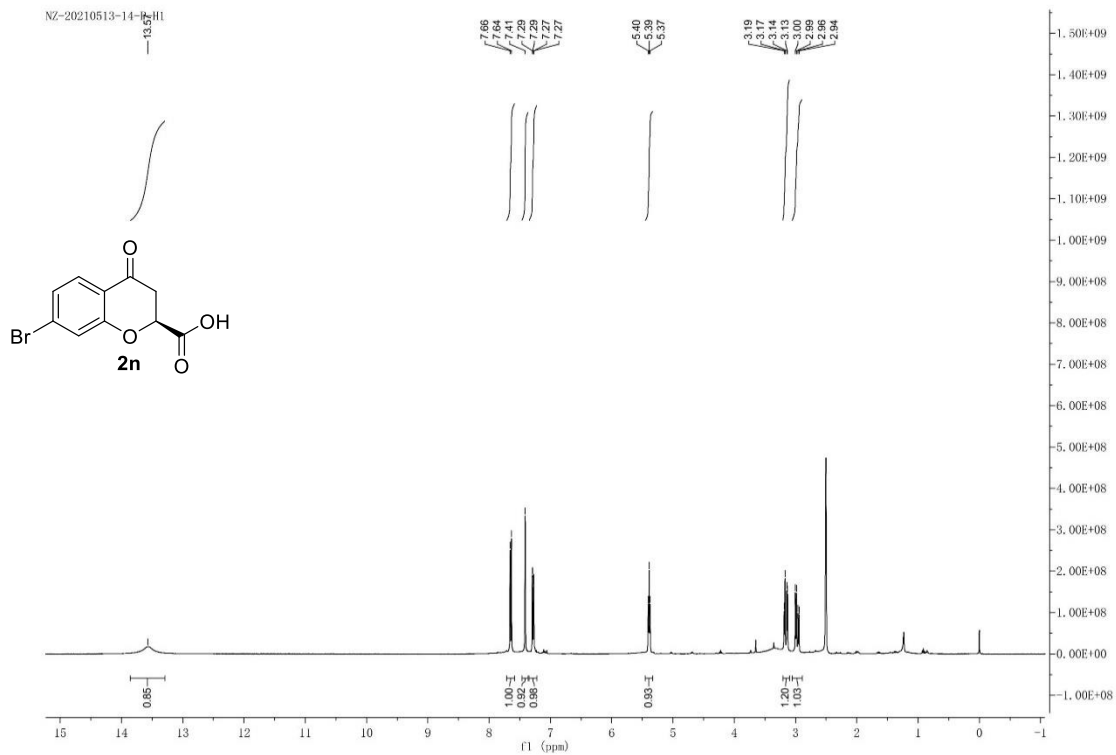

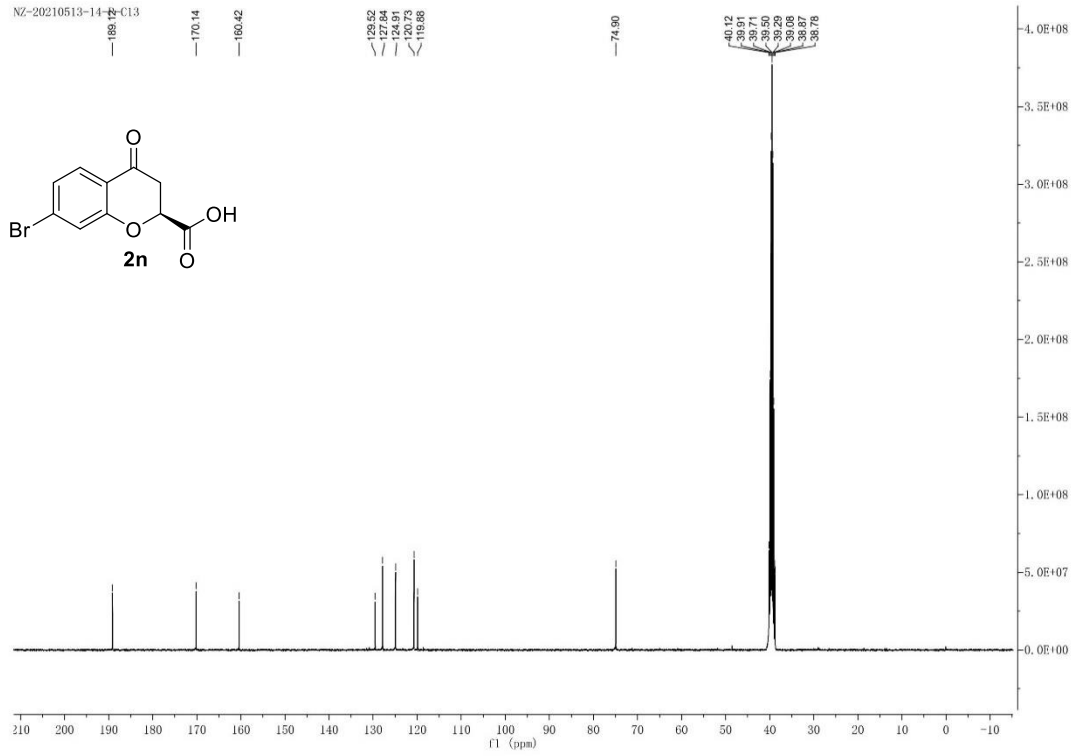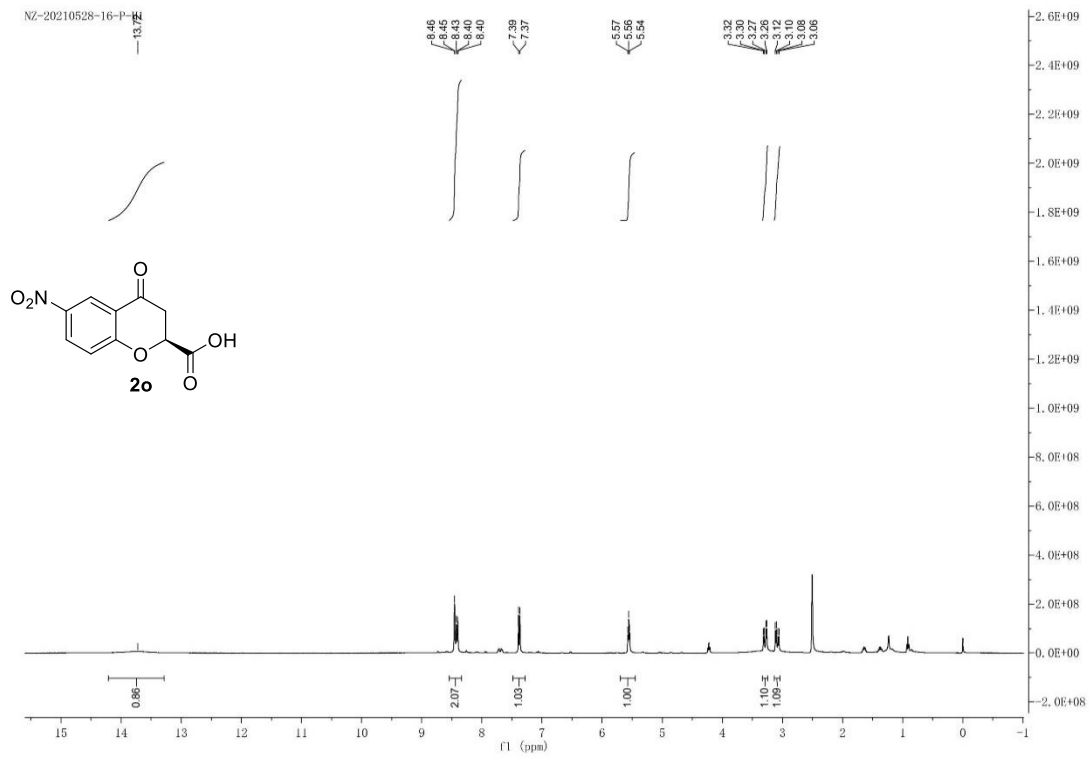

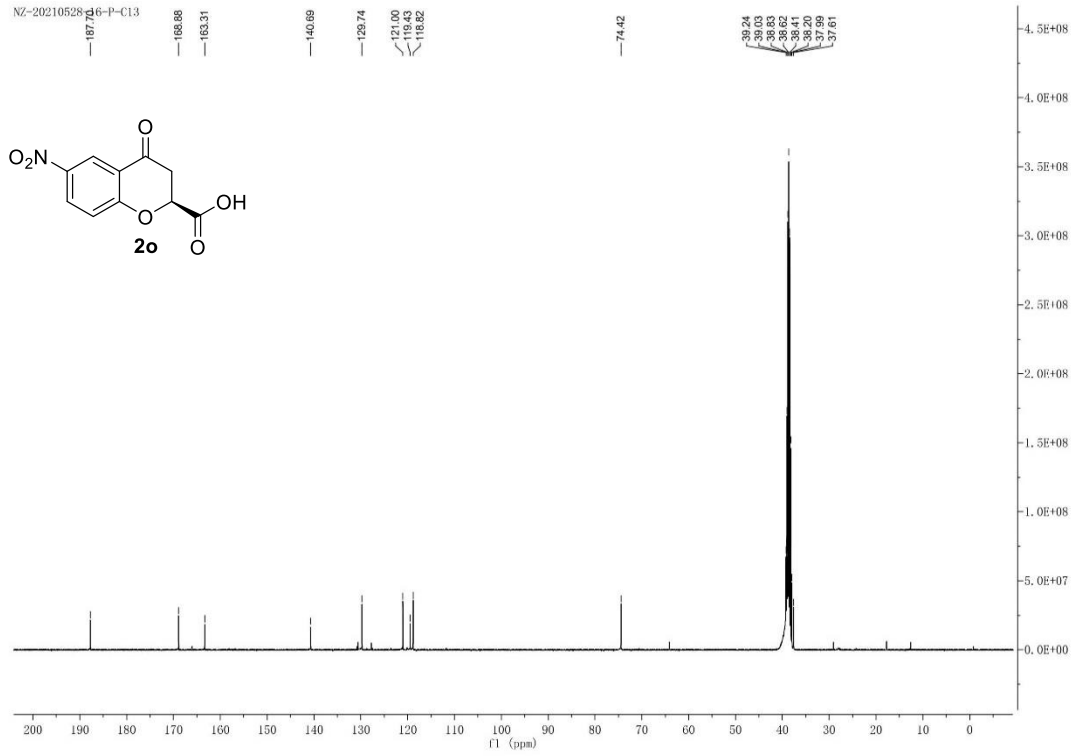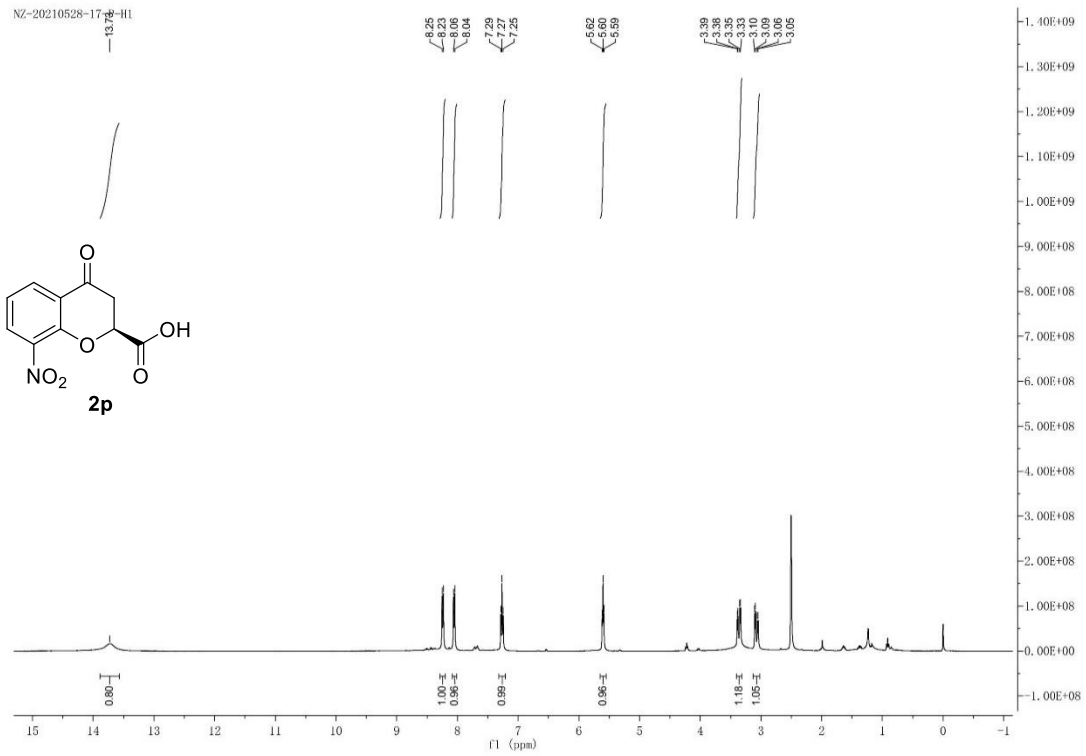

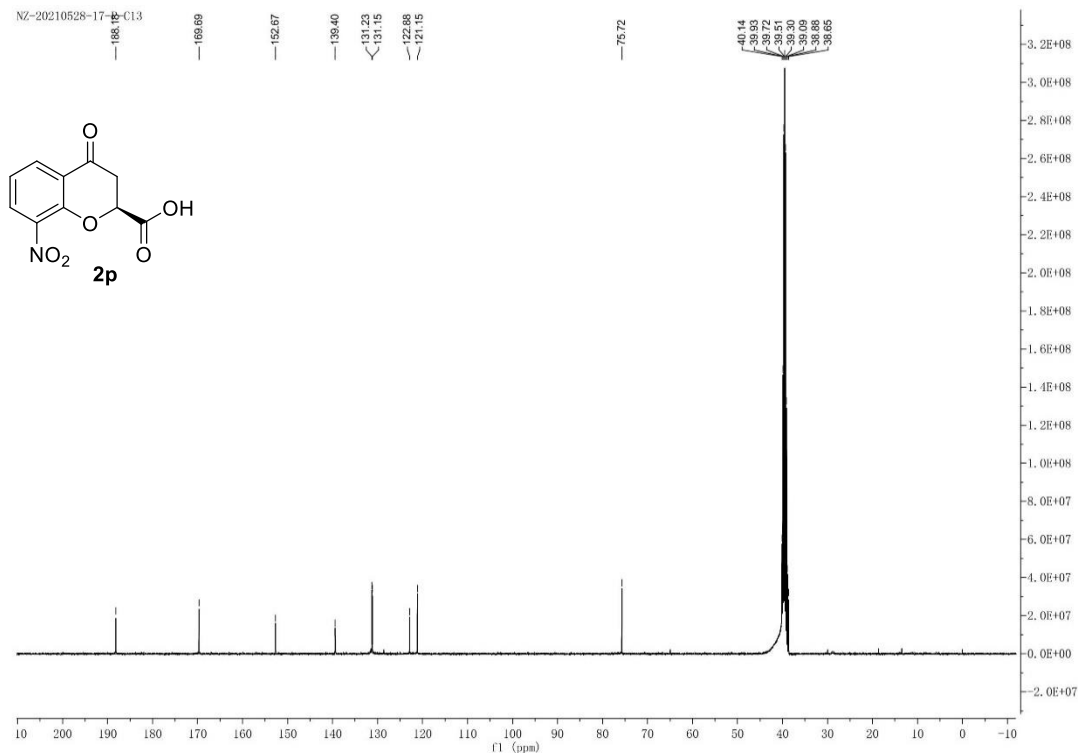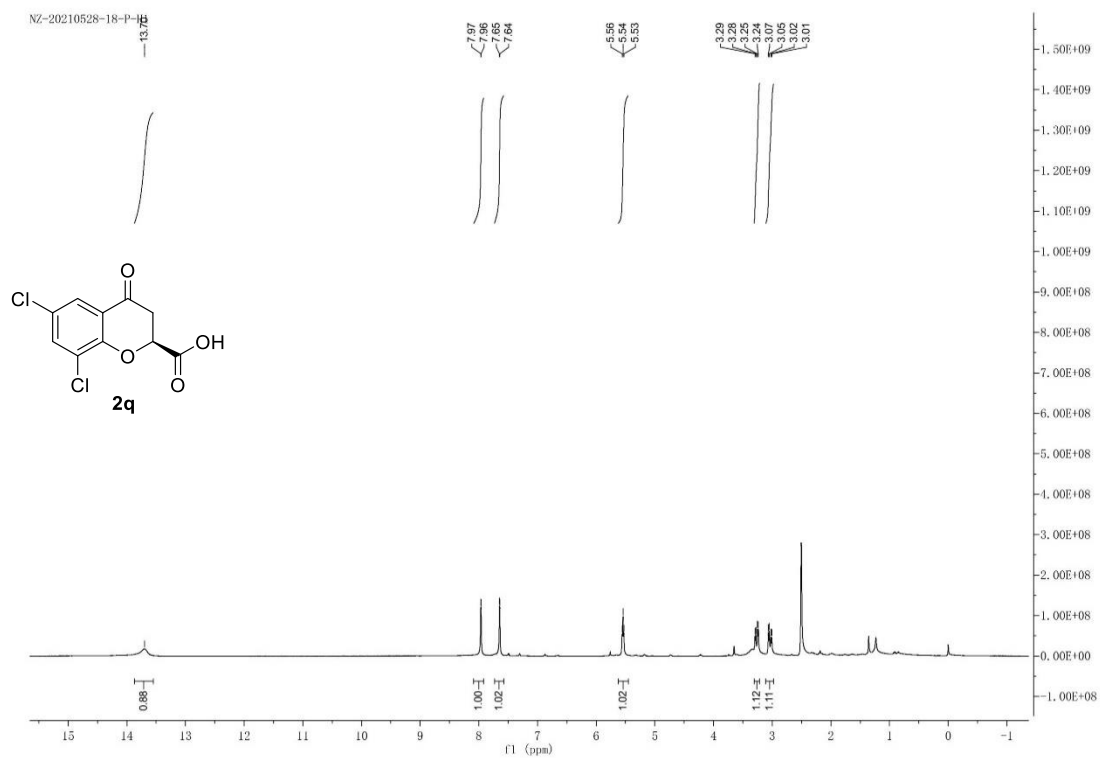

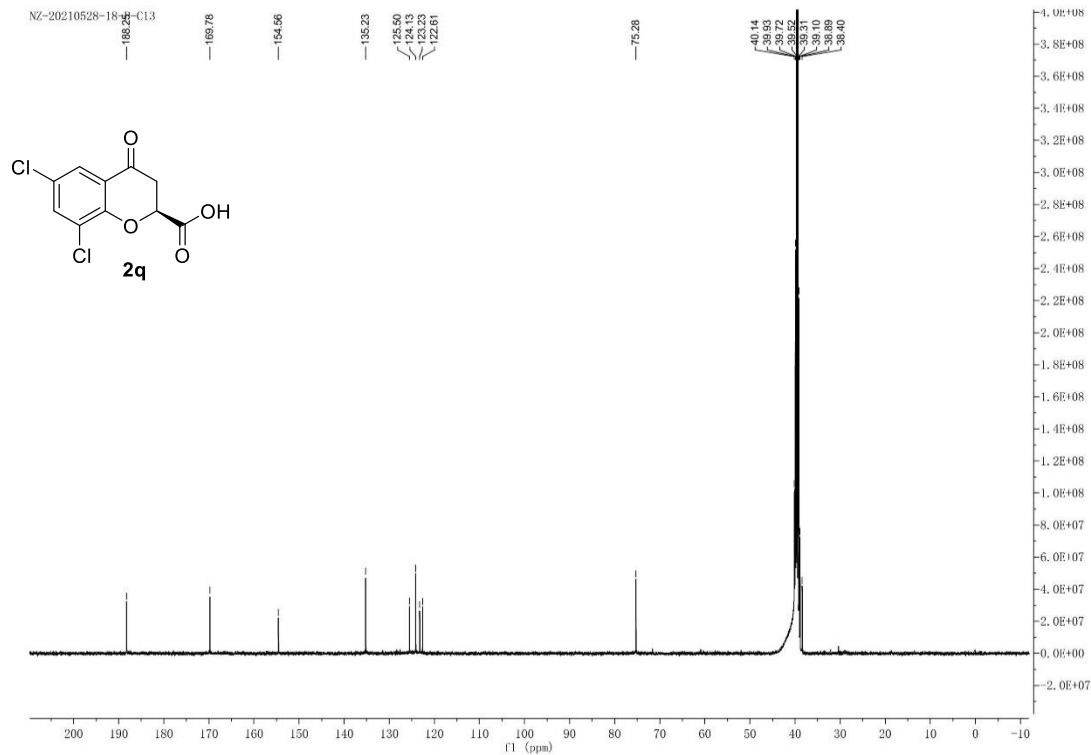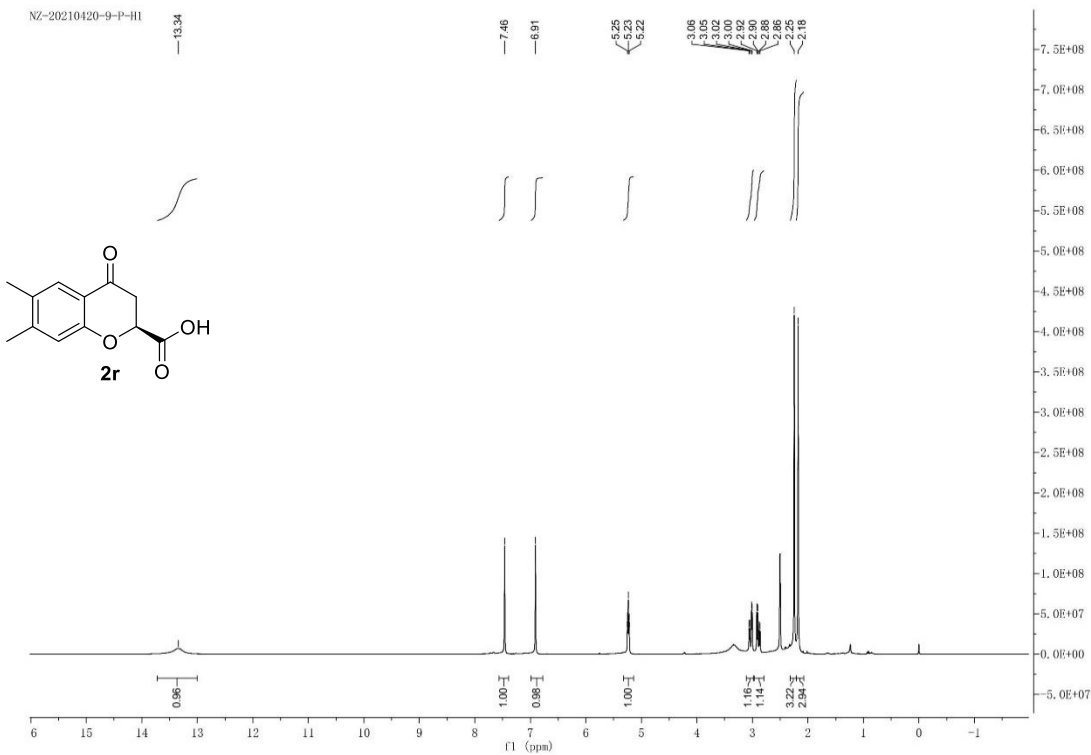

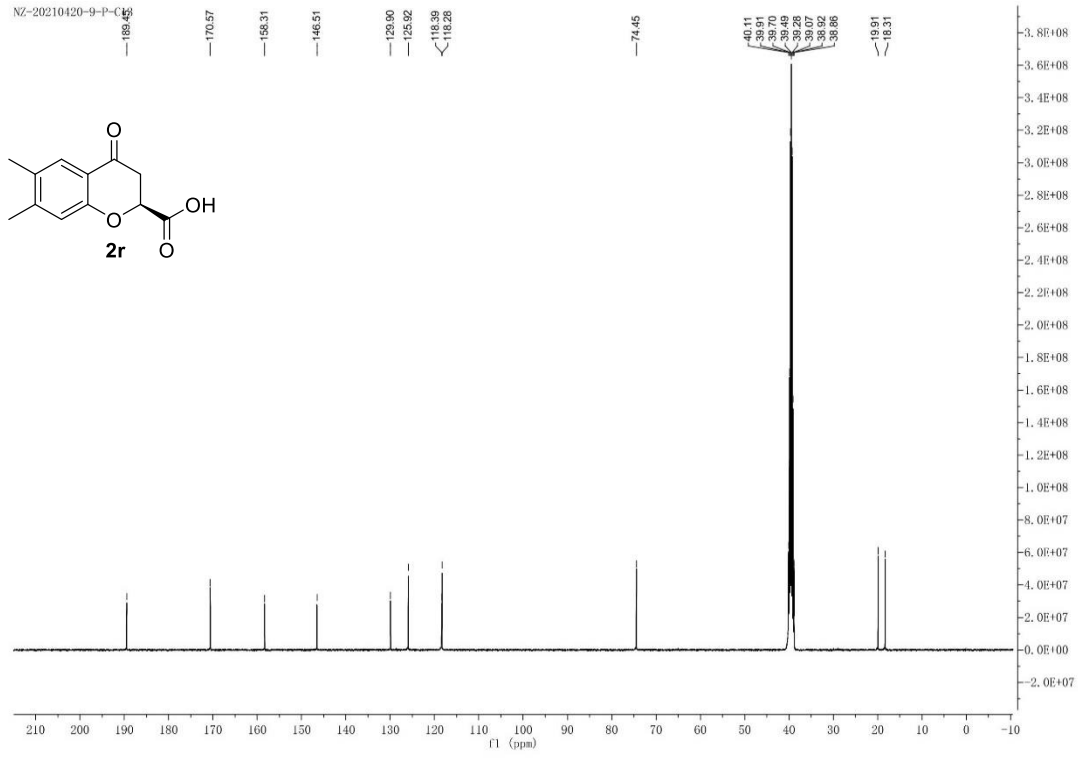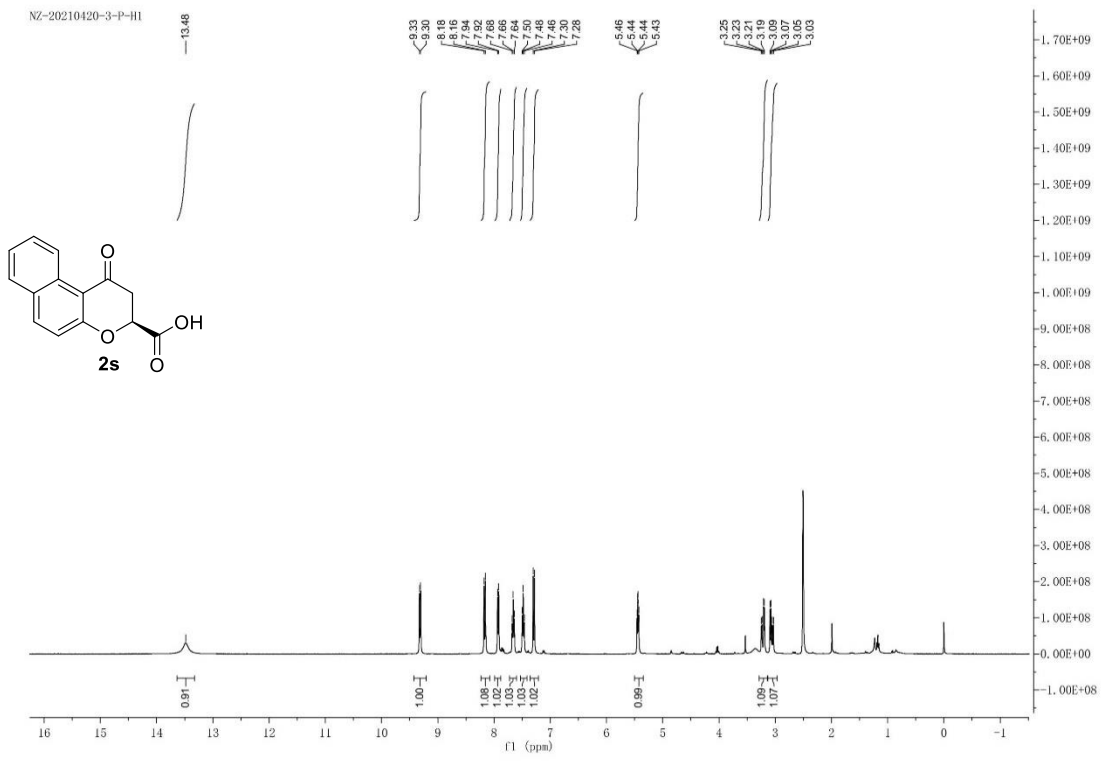

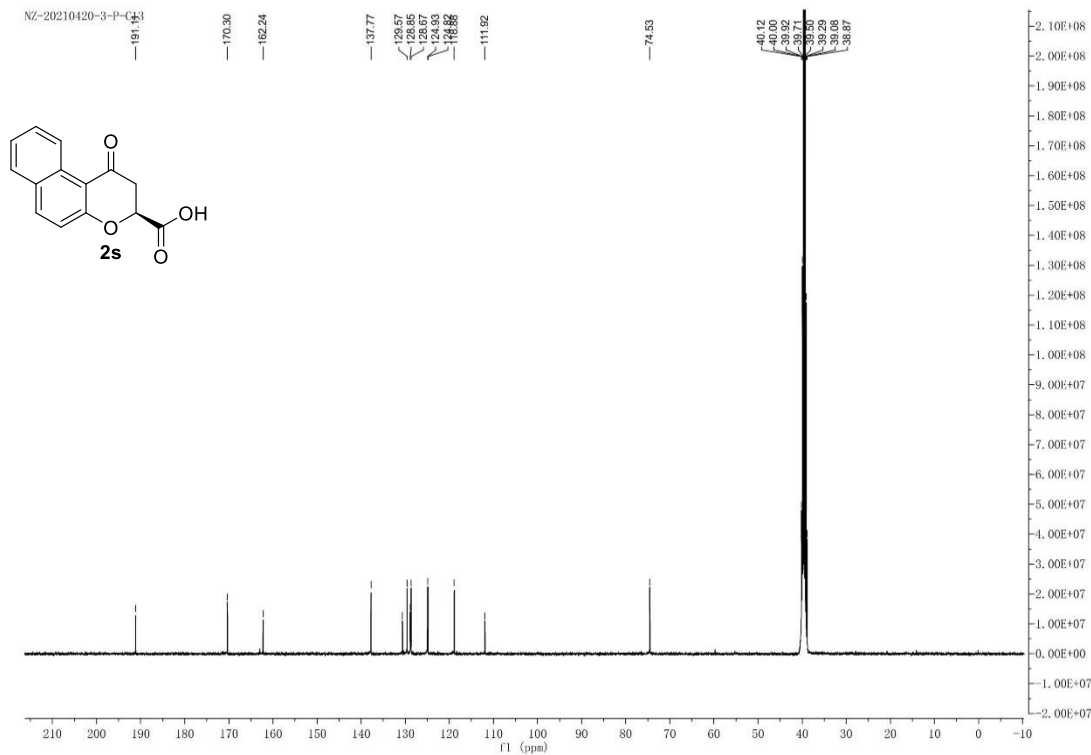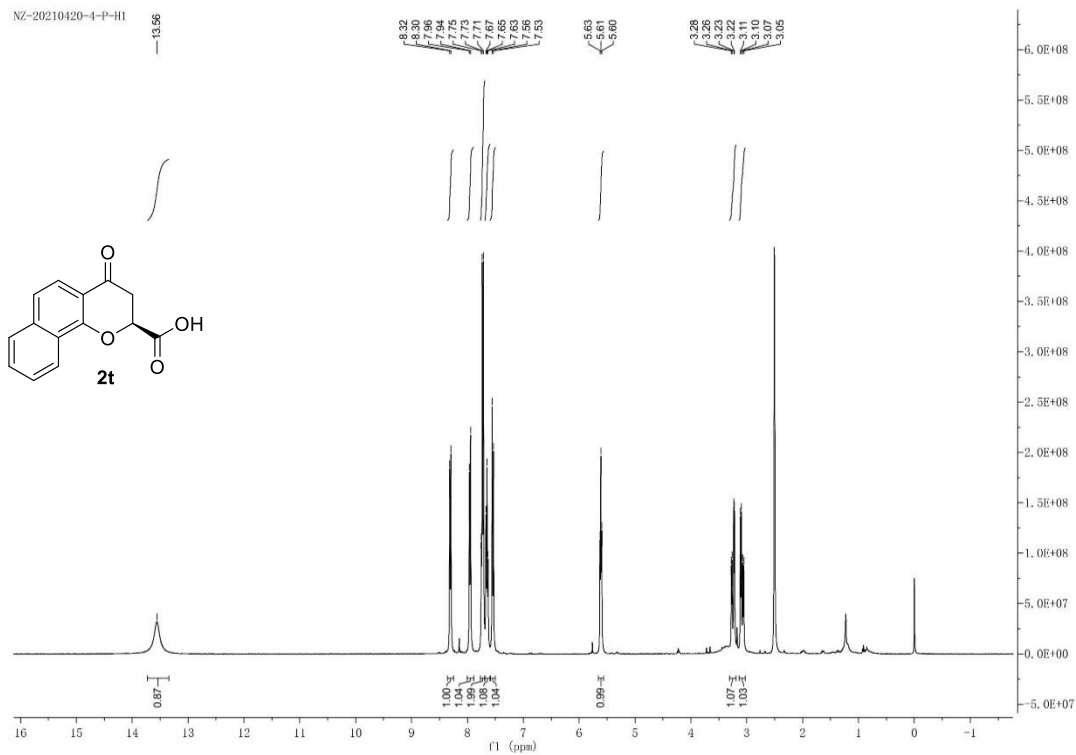

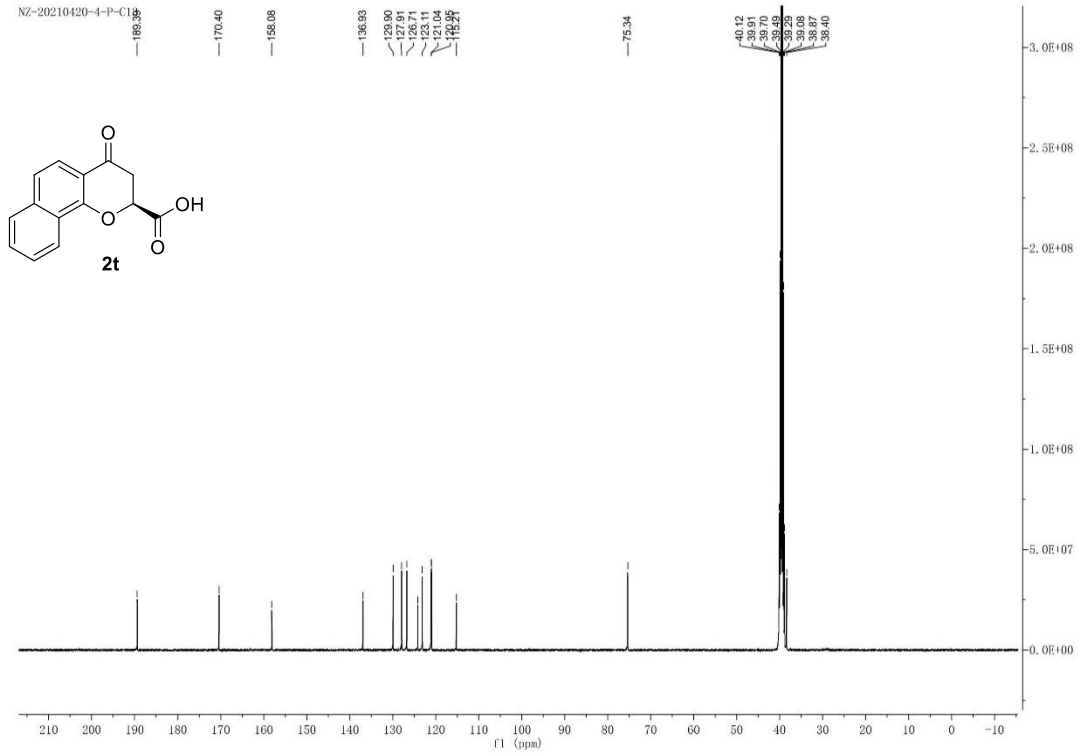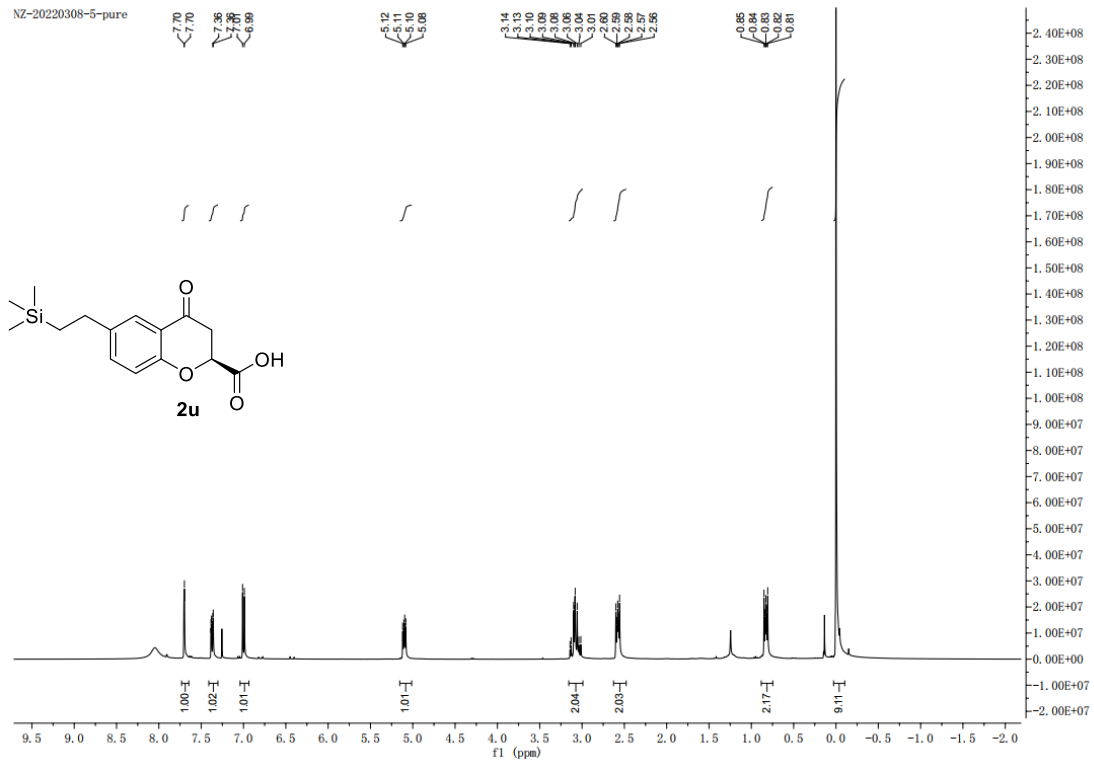



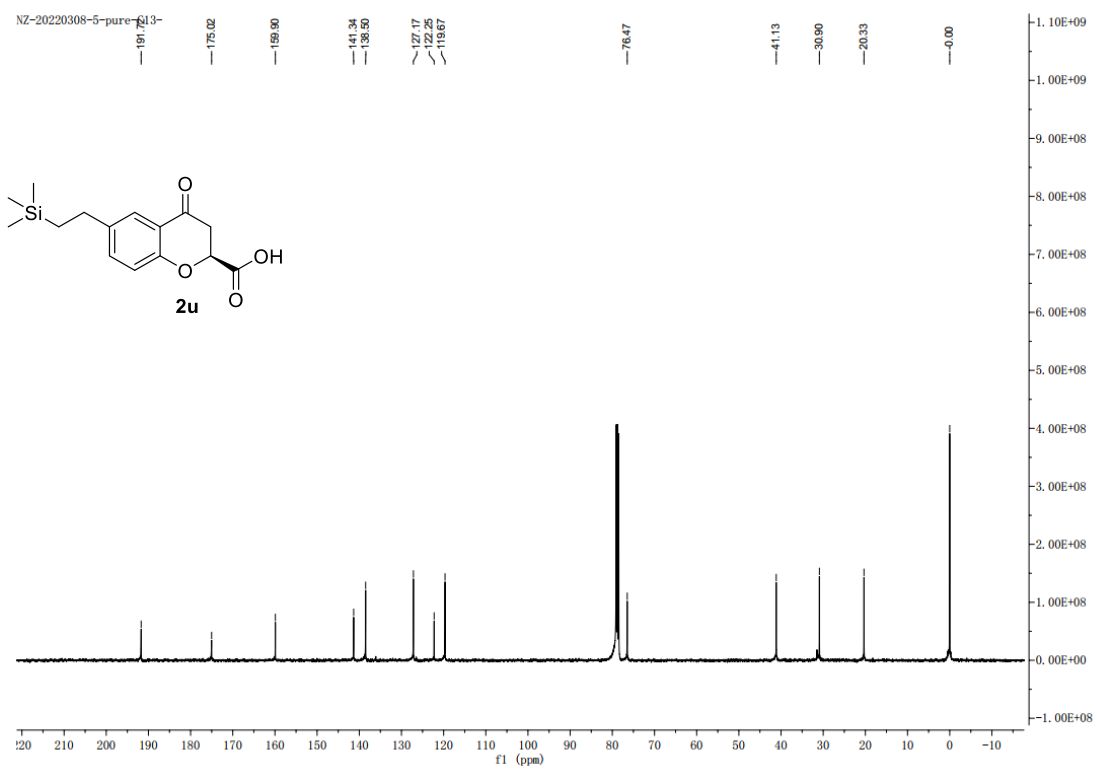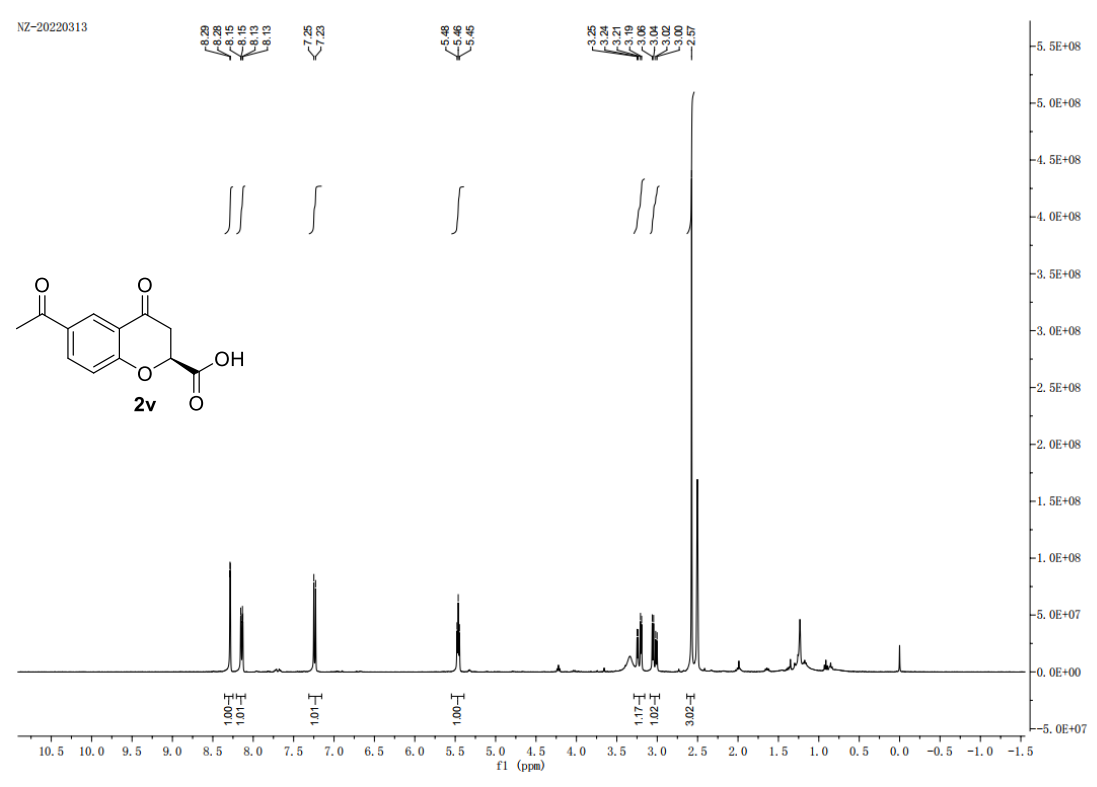

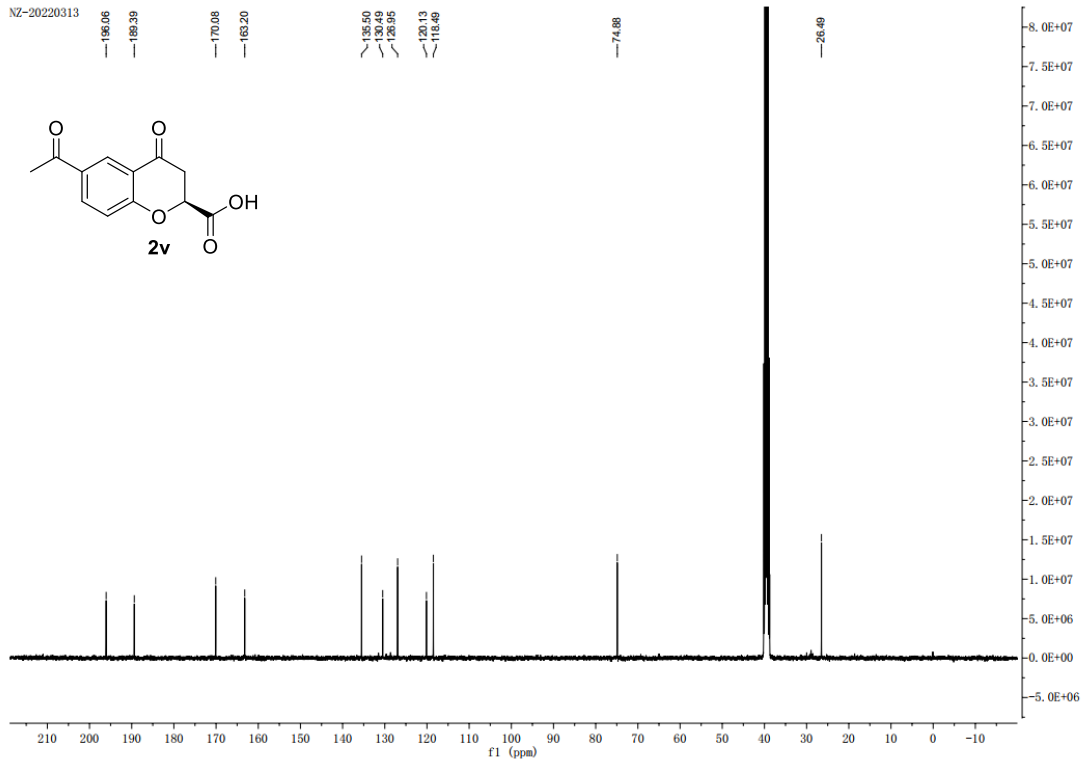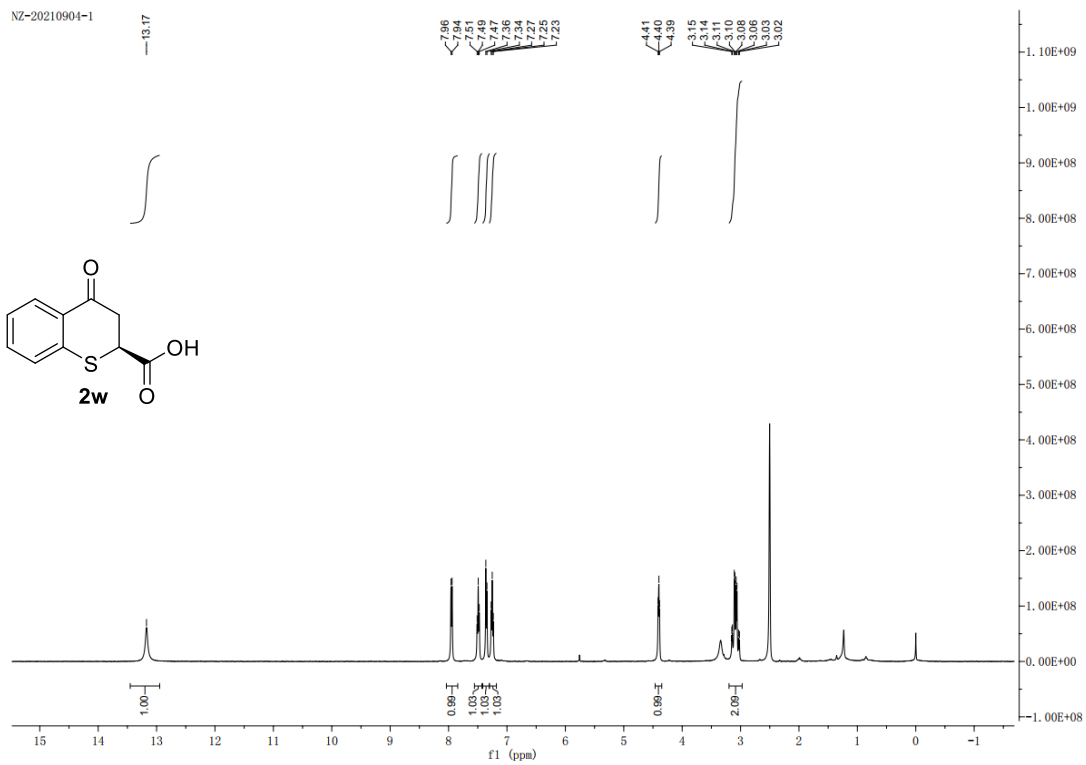

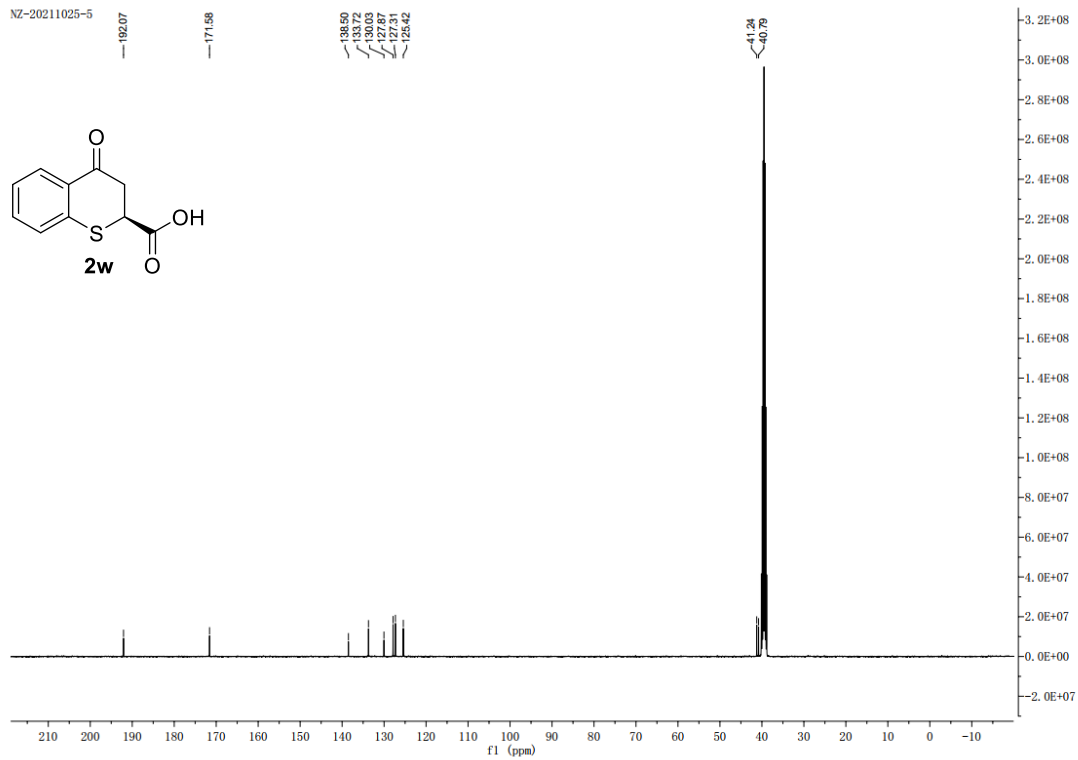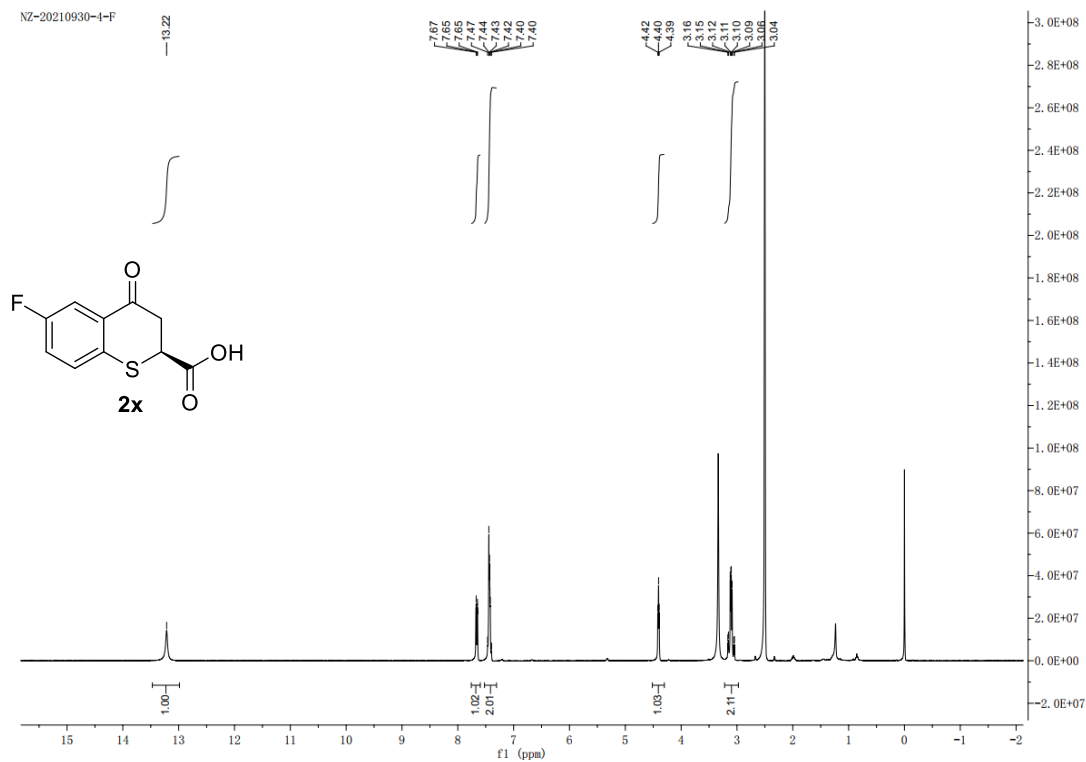

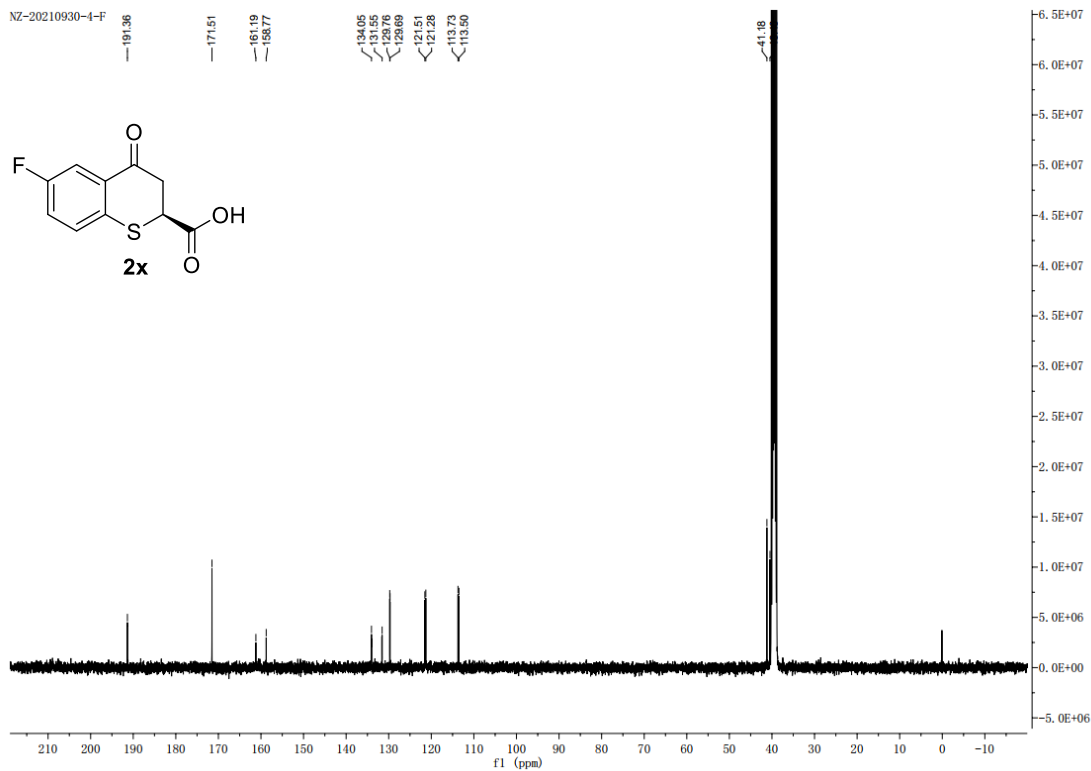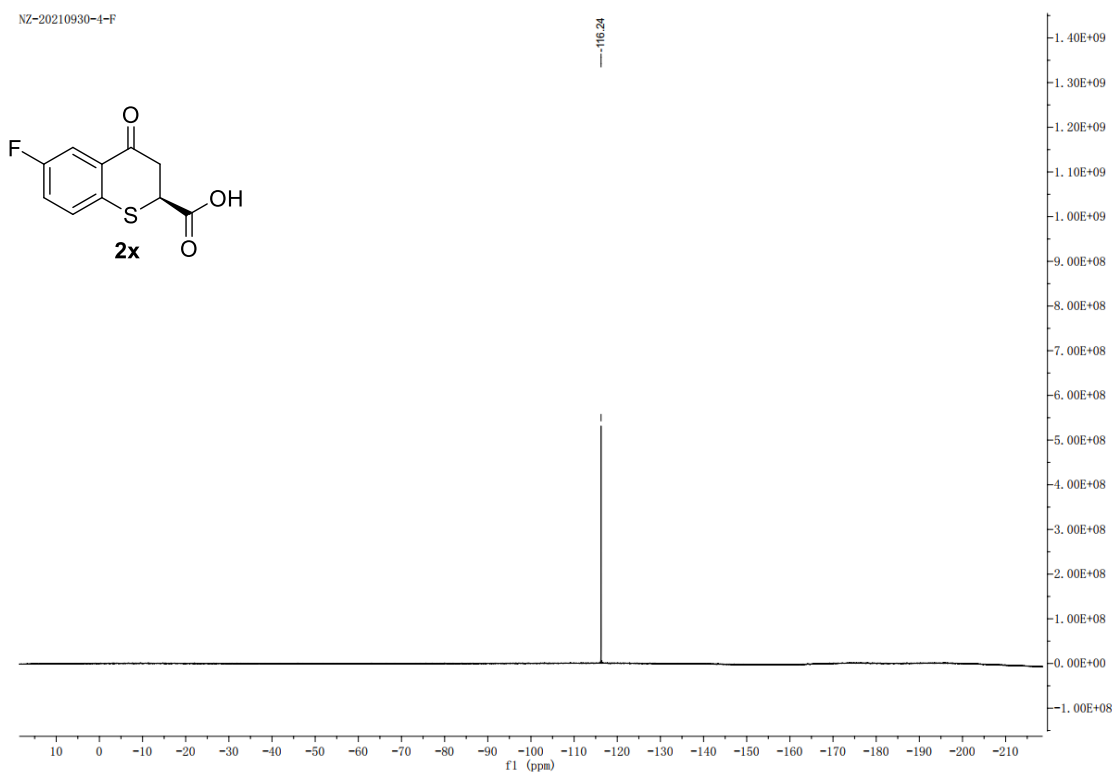

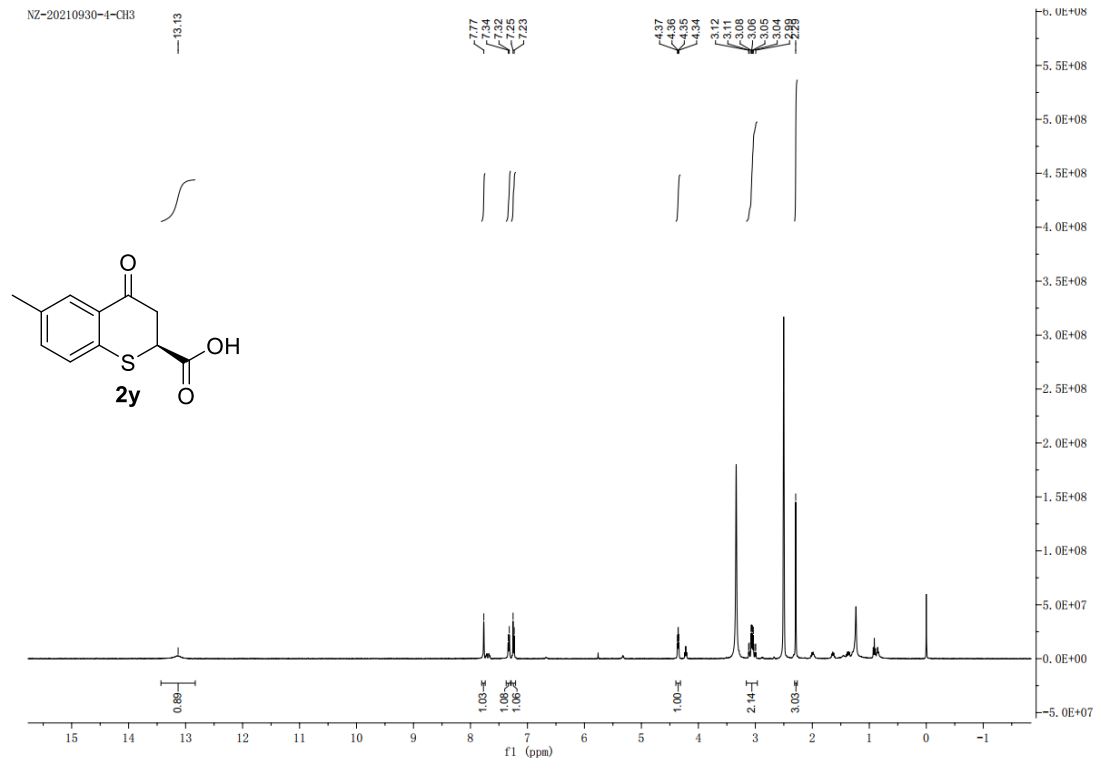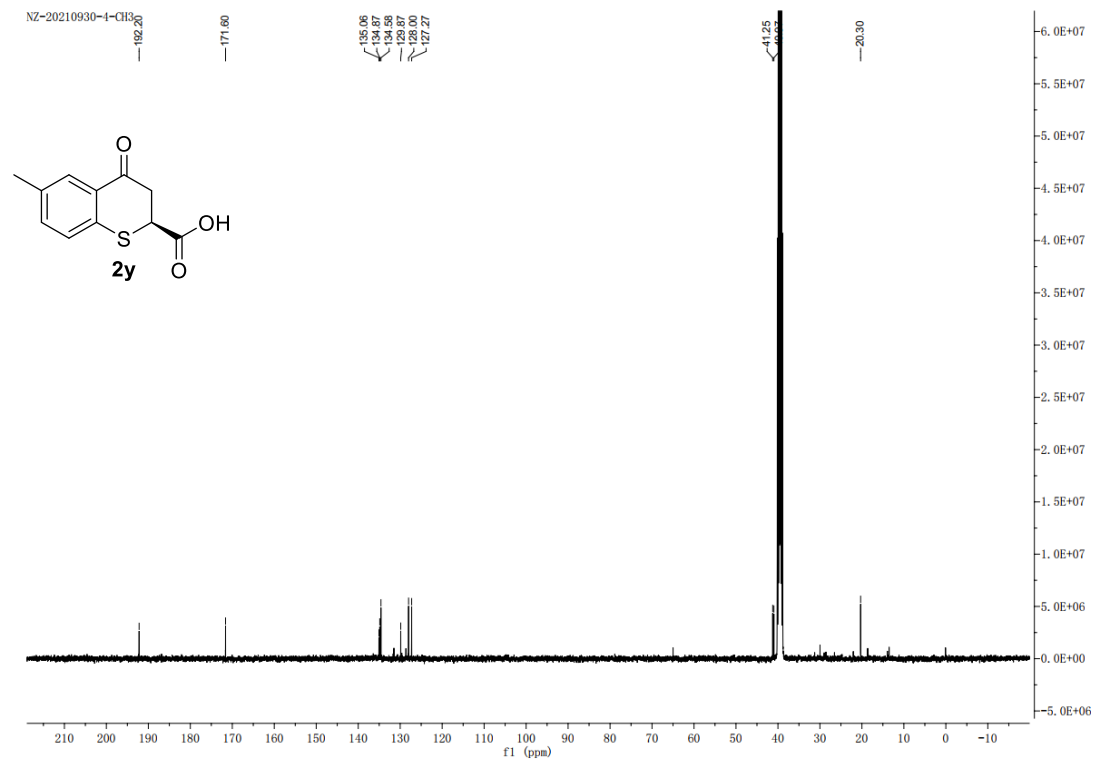

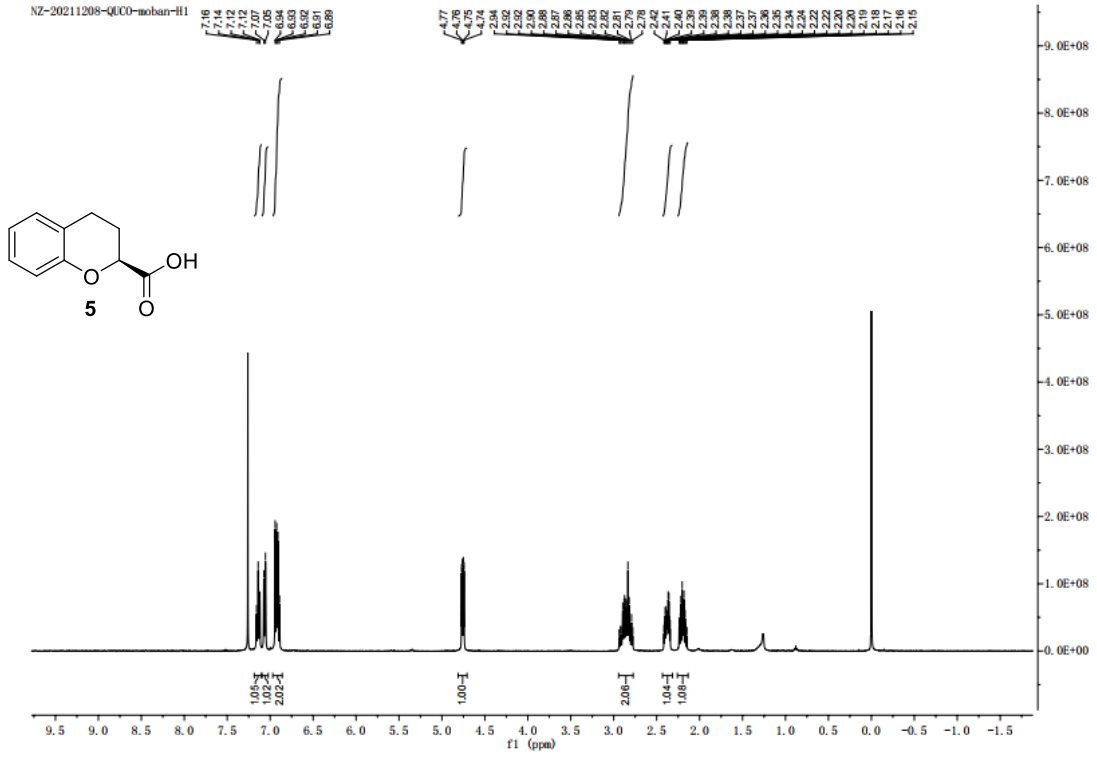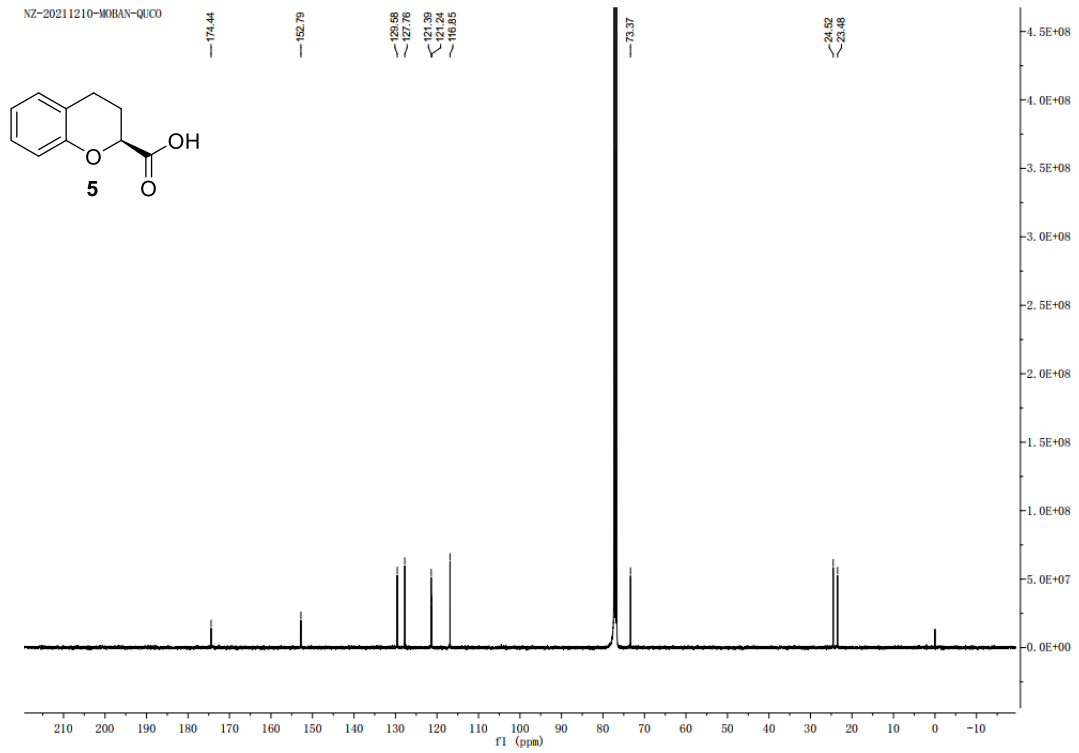

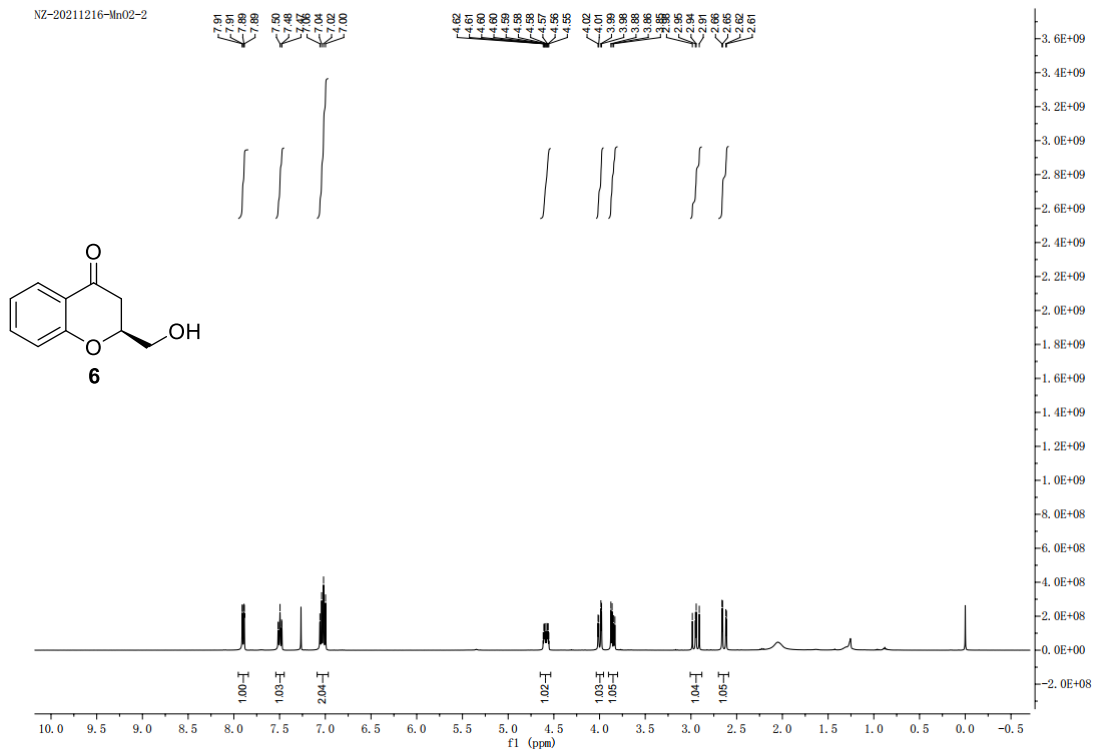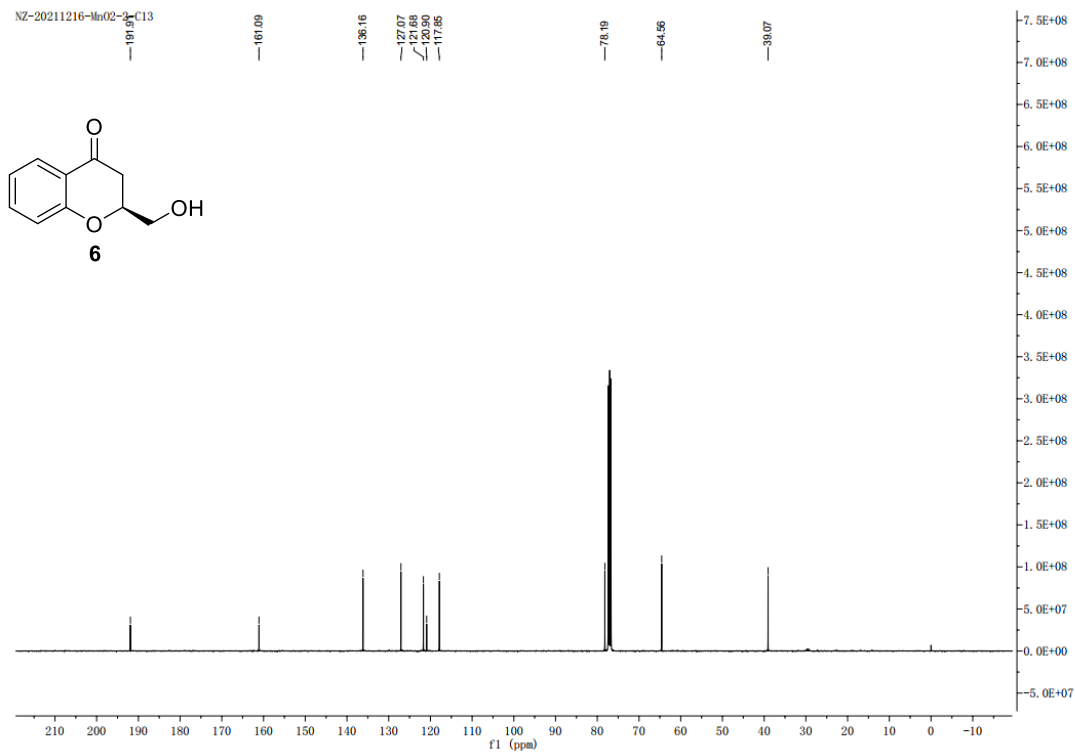

NZ-20211208-SHY-moban-H1

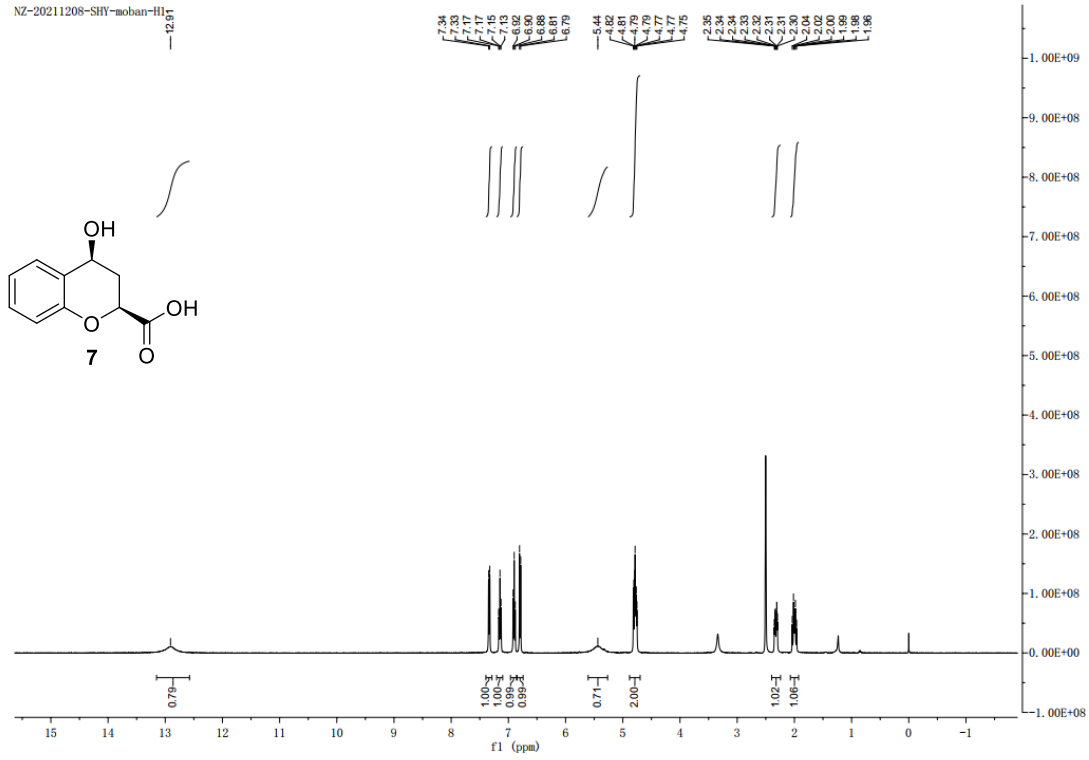

NZ-20211210-SHY-MOBAN

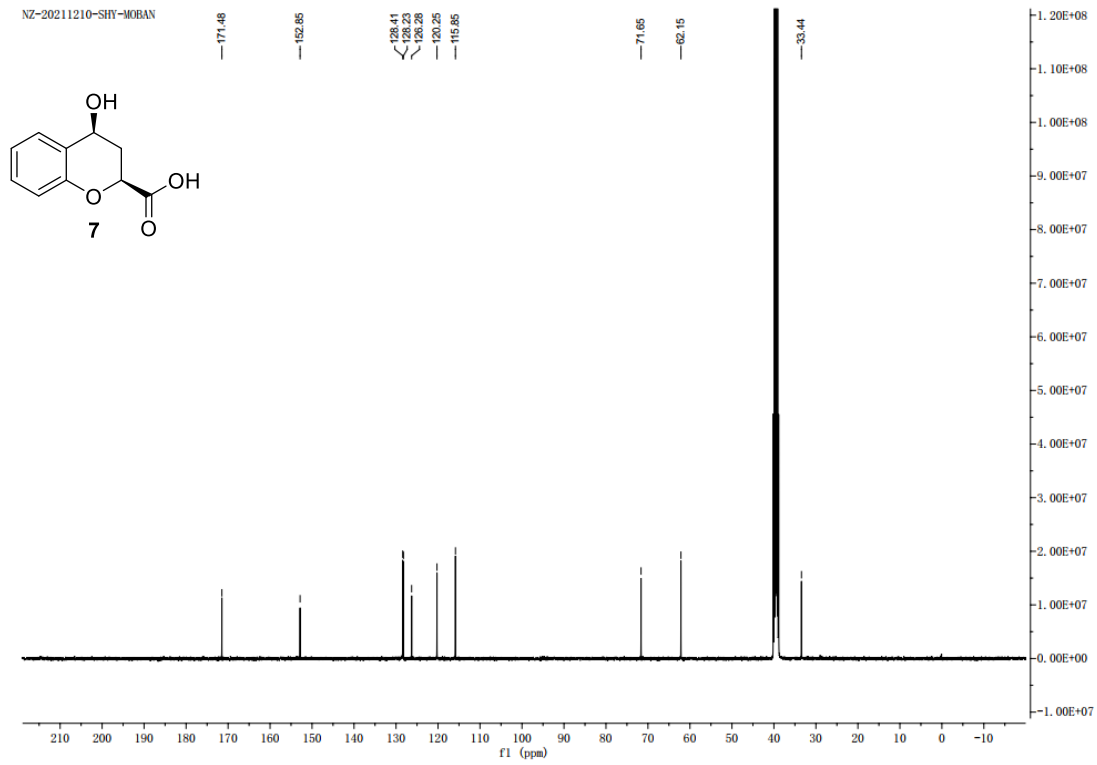



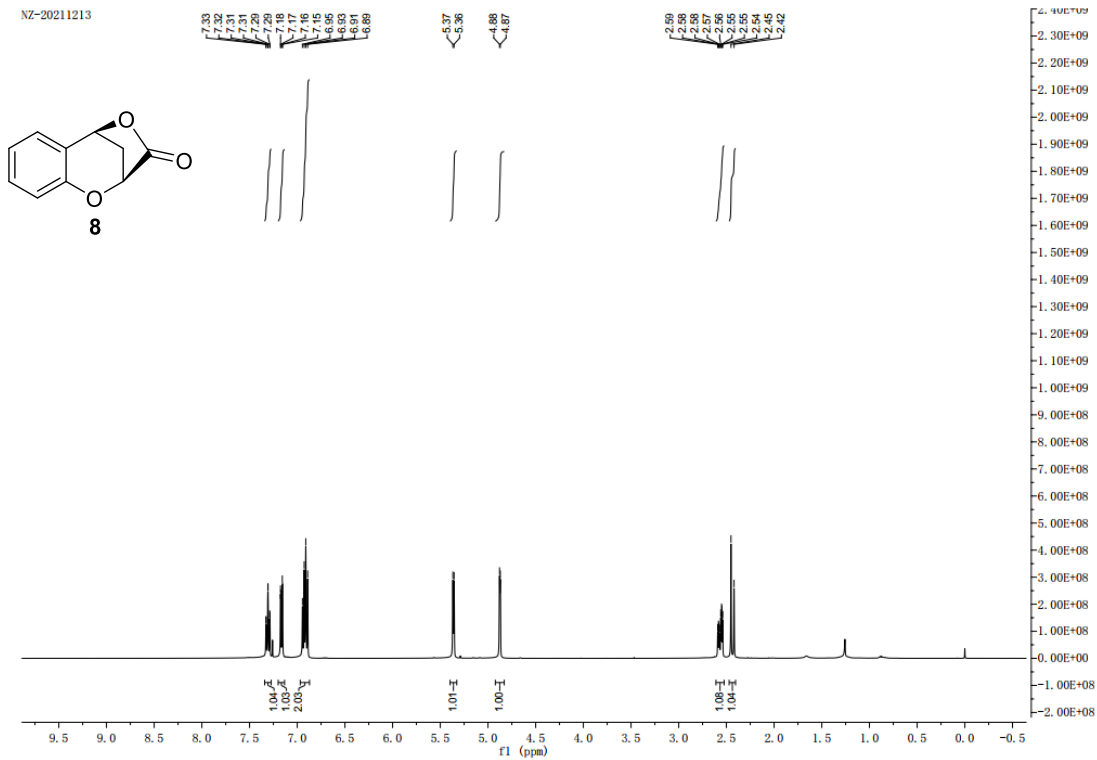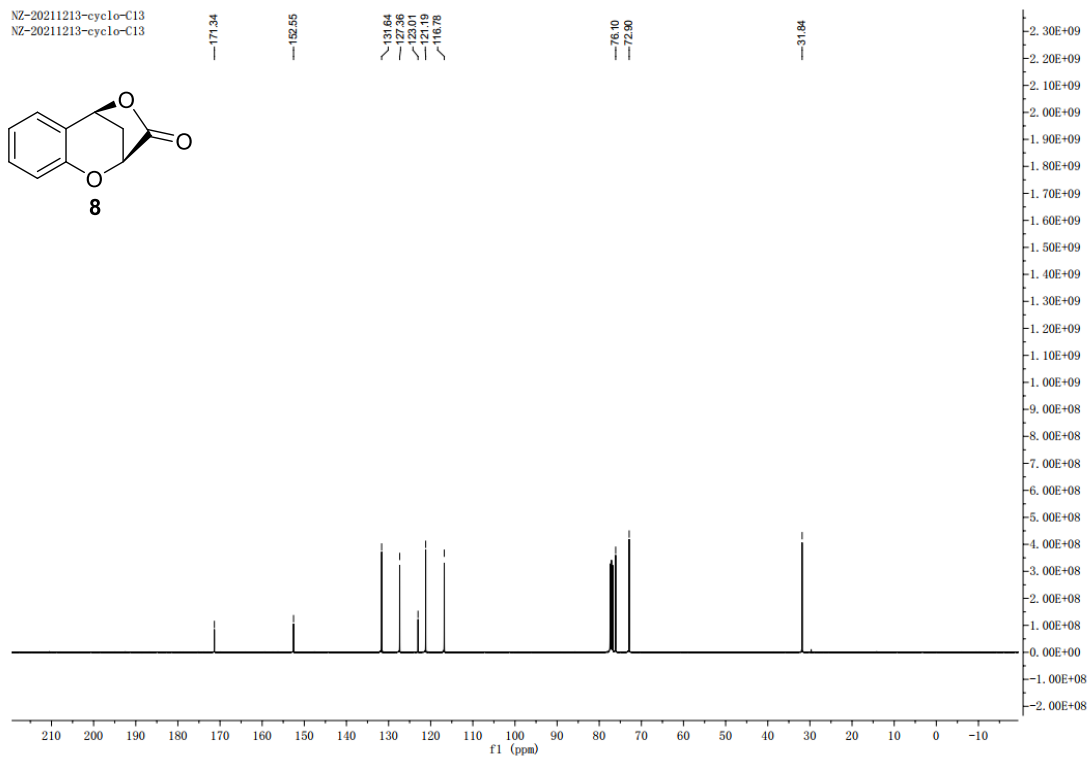

## 9. HPLC spectra

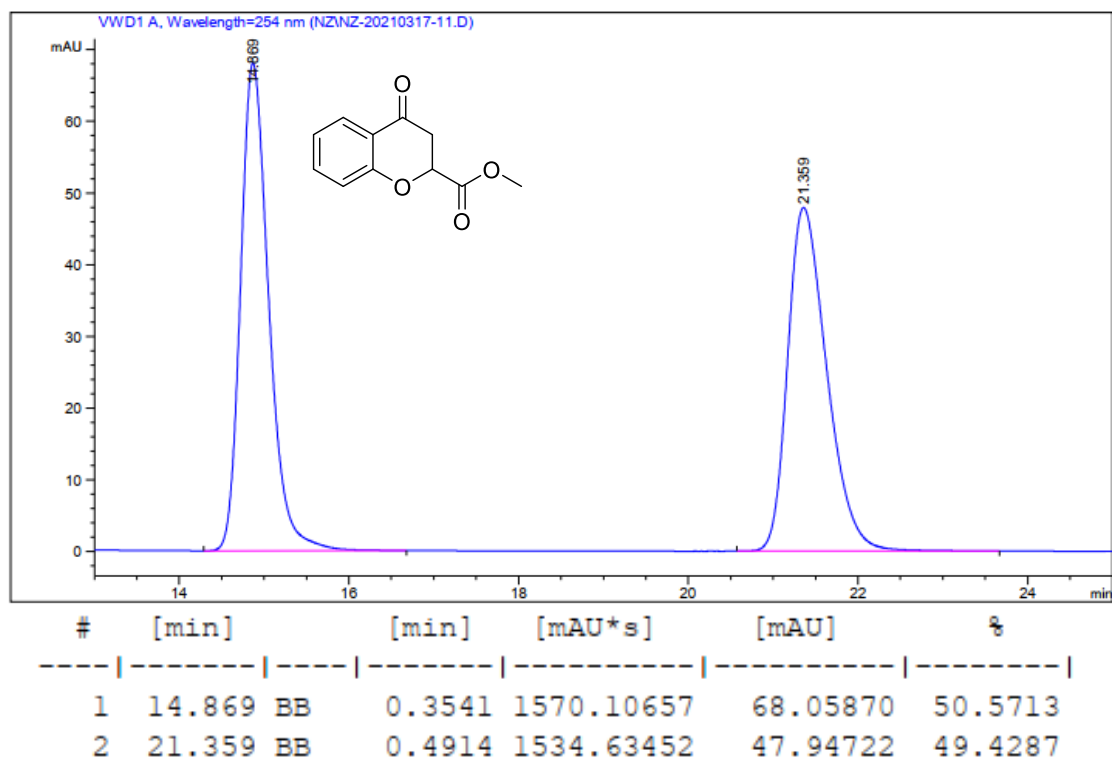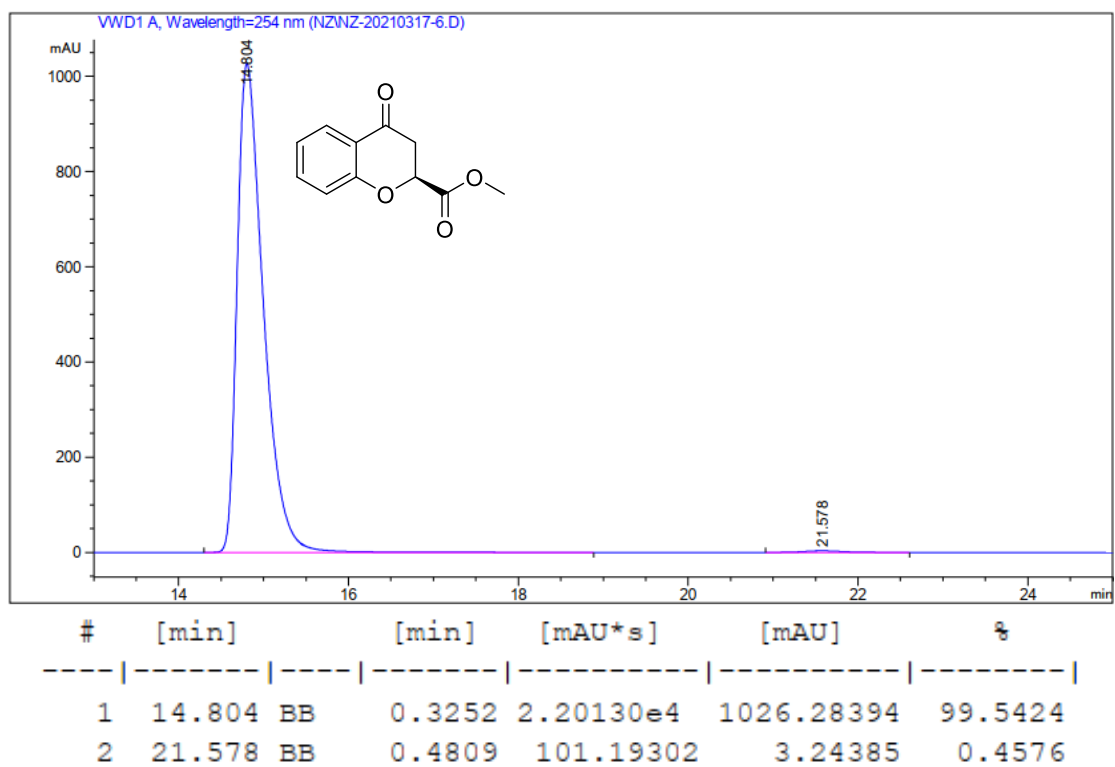

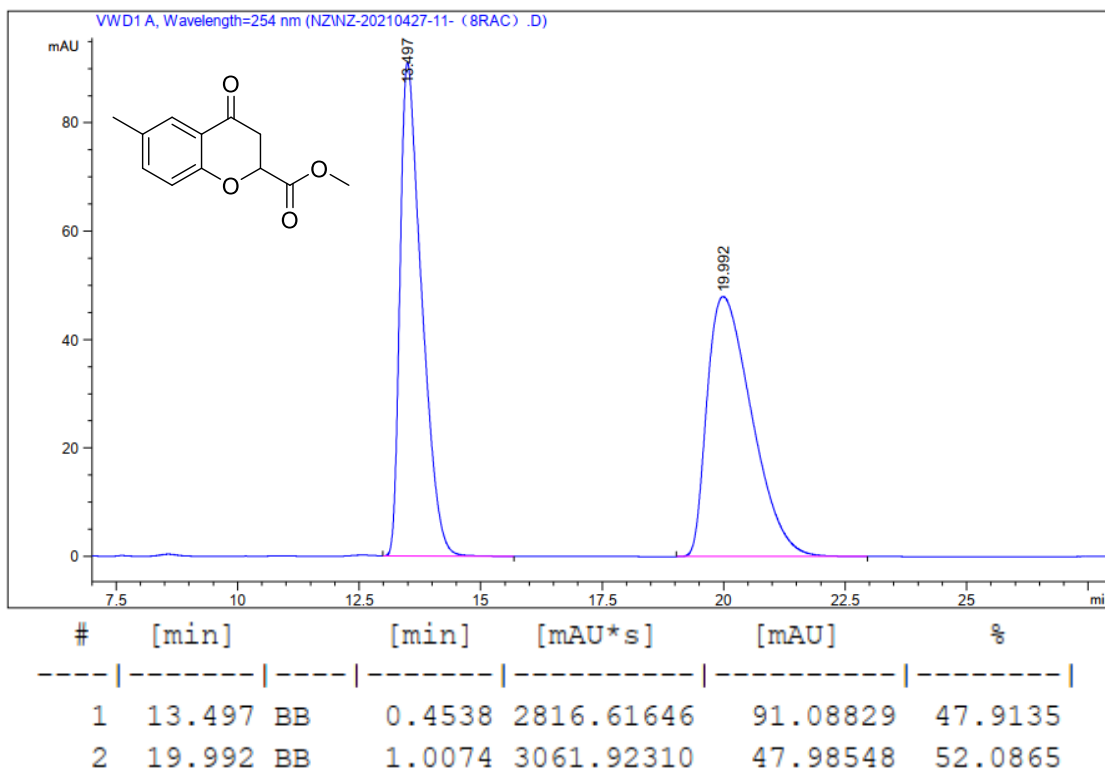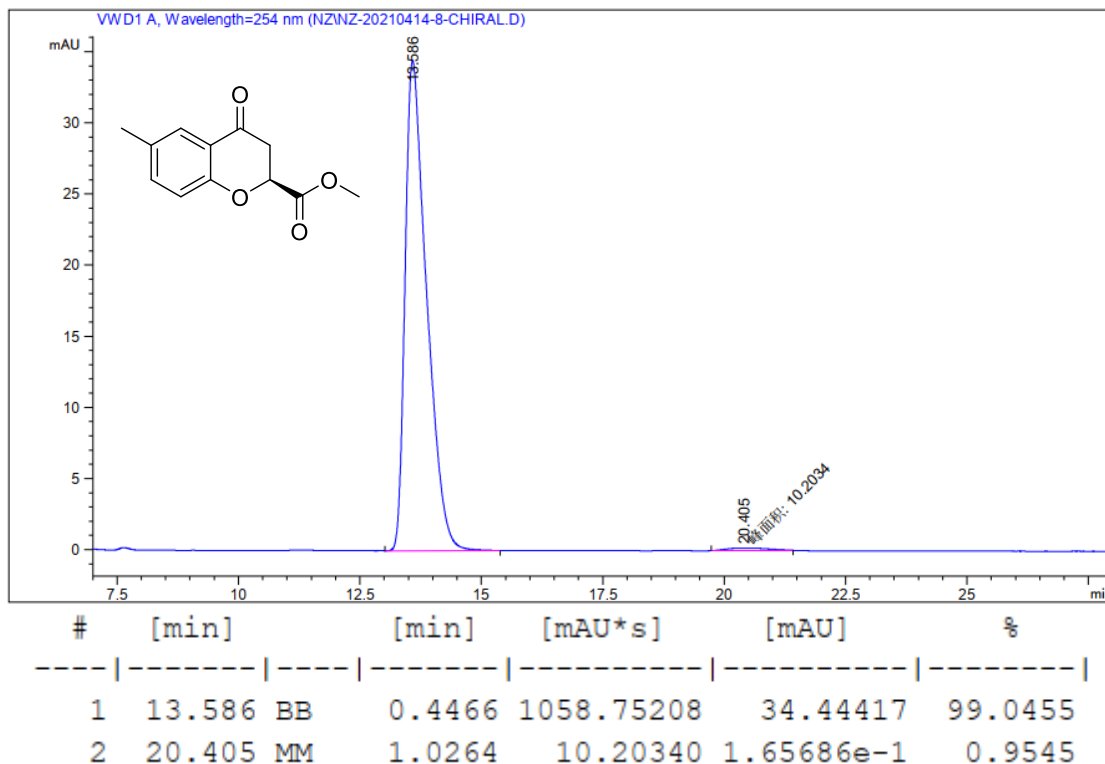

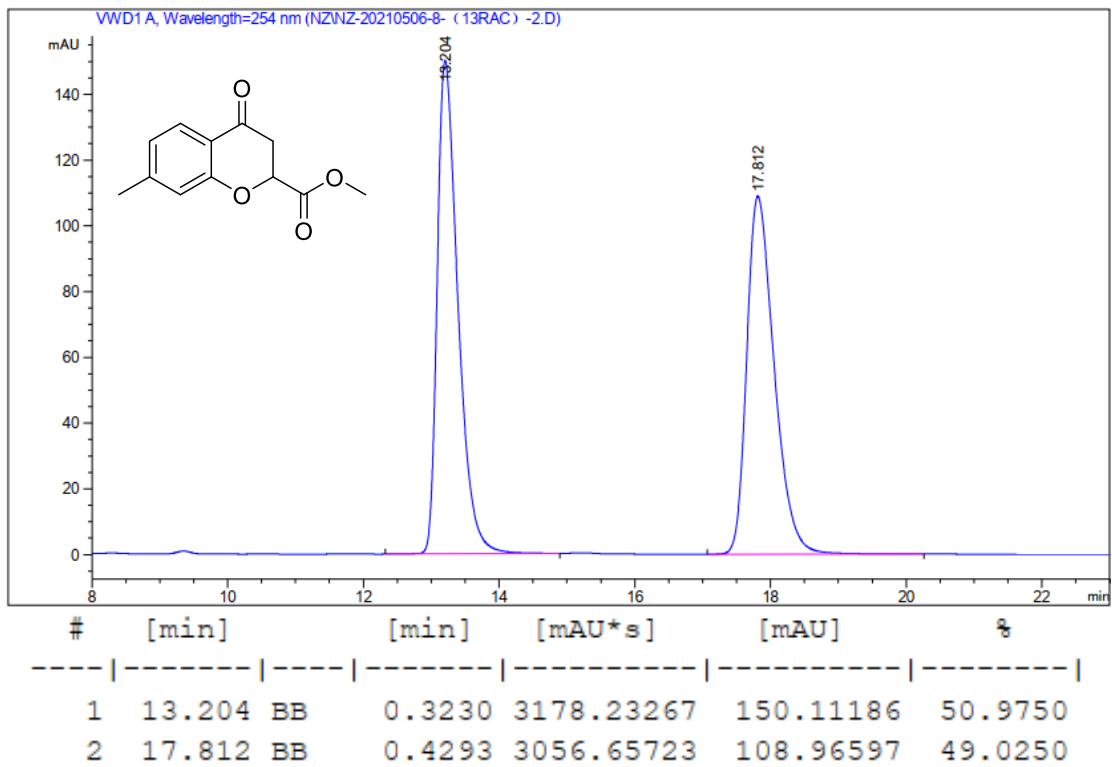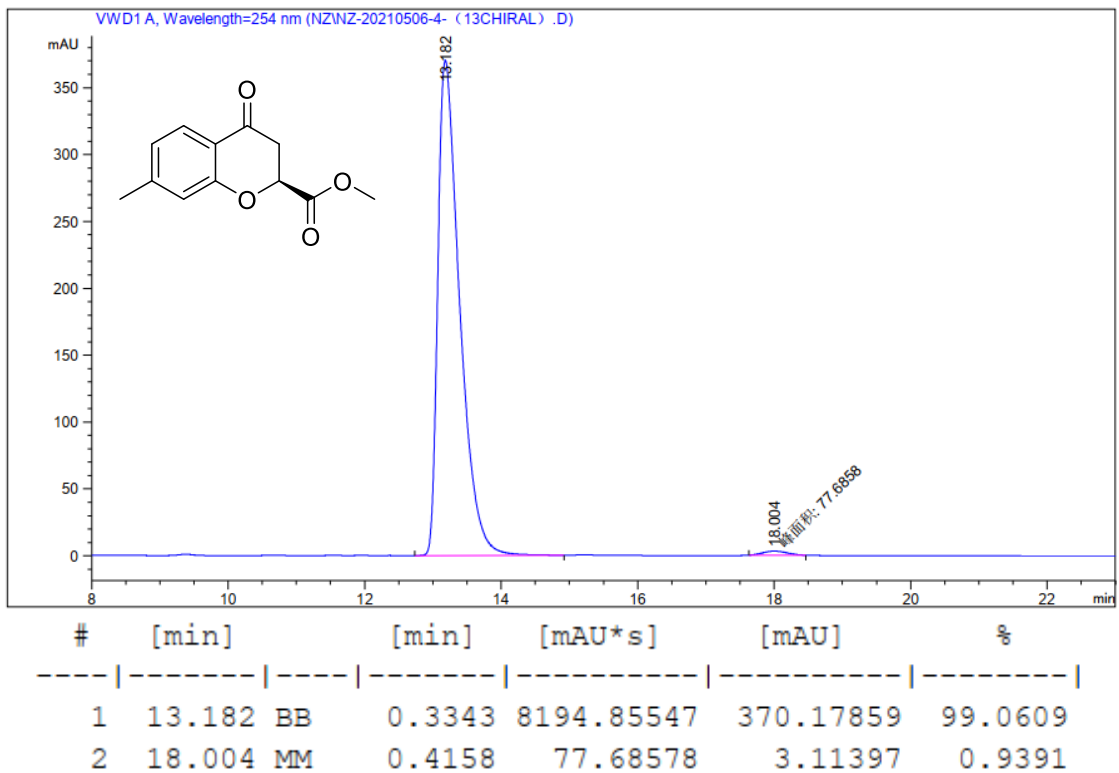

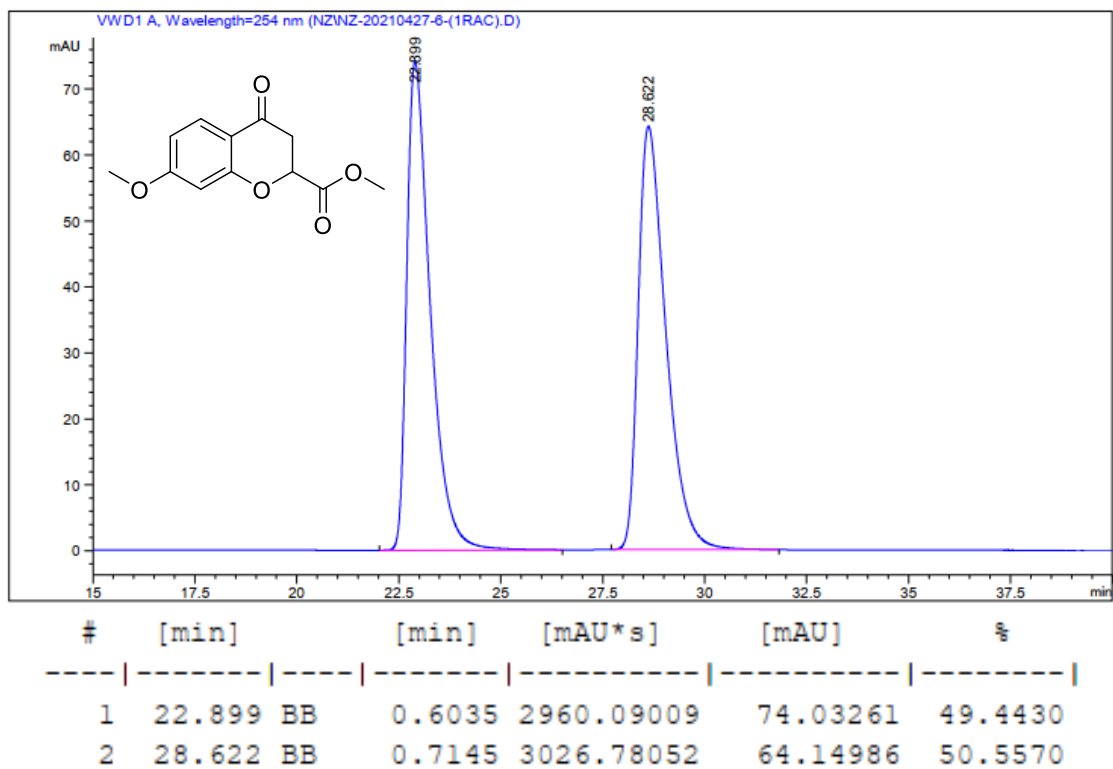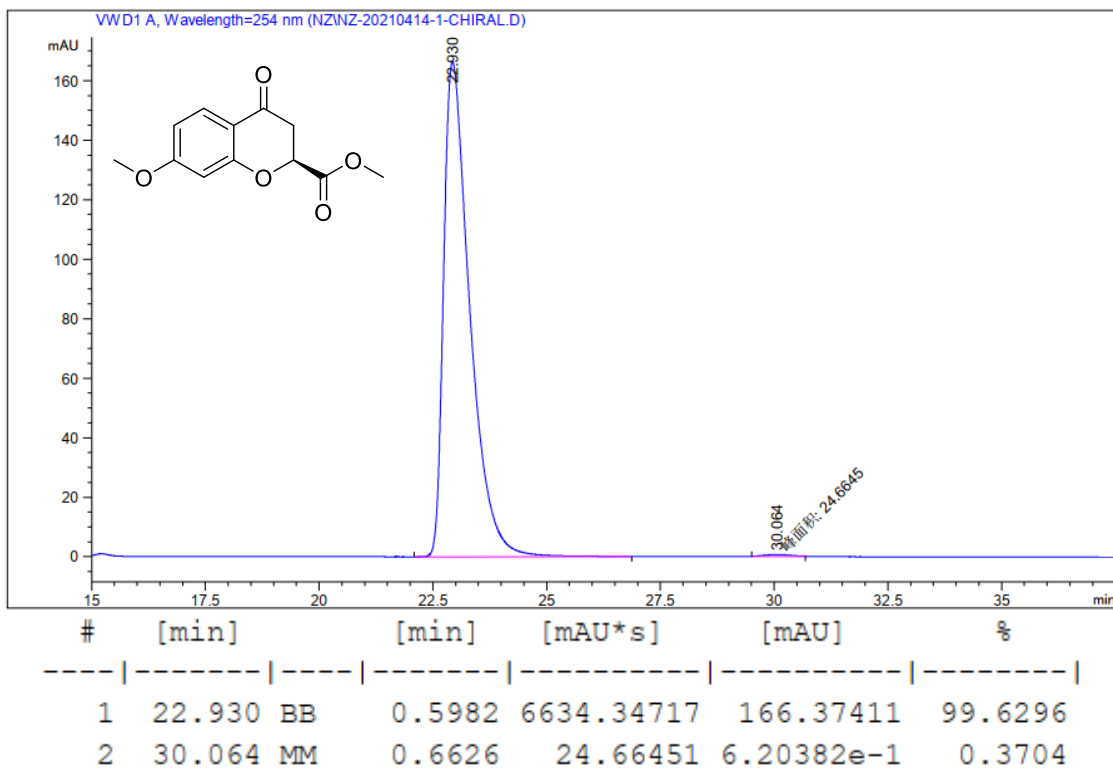

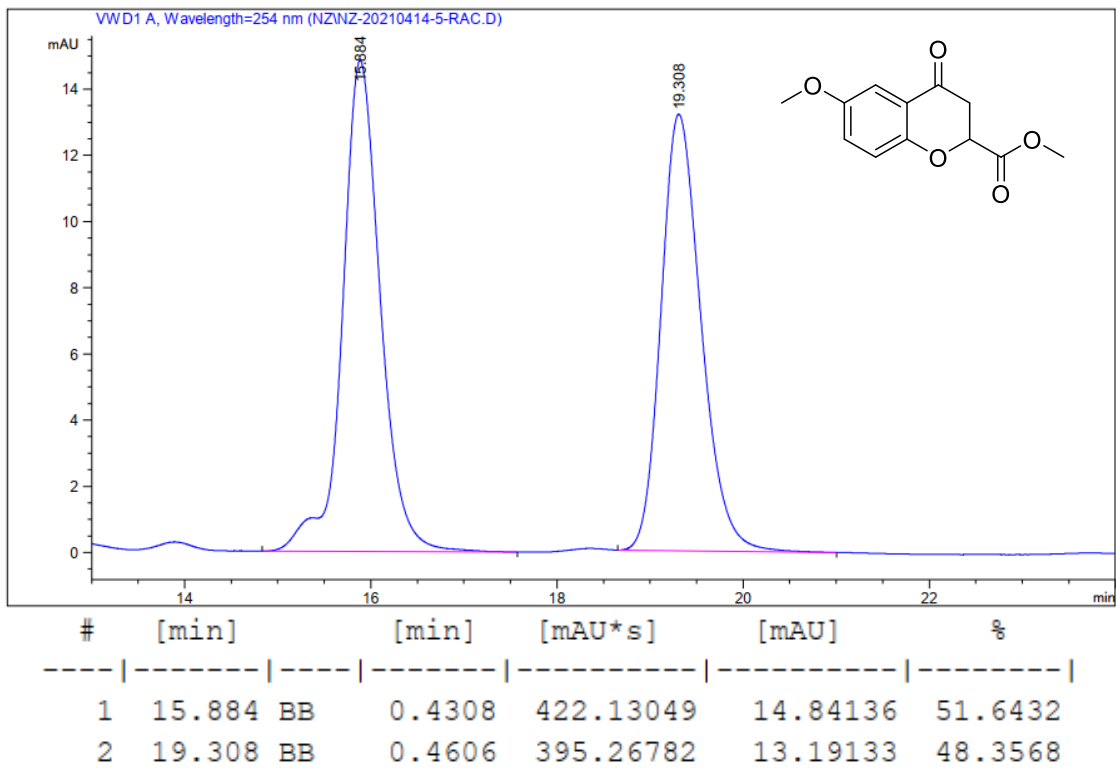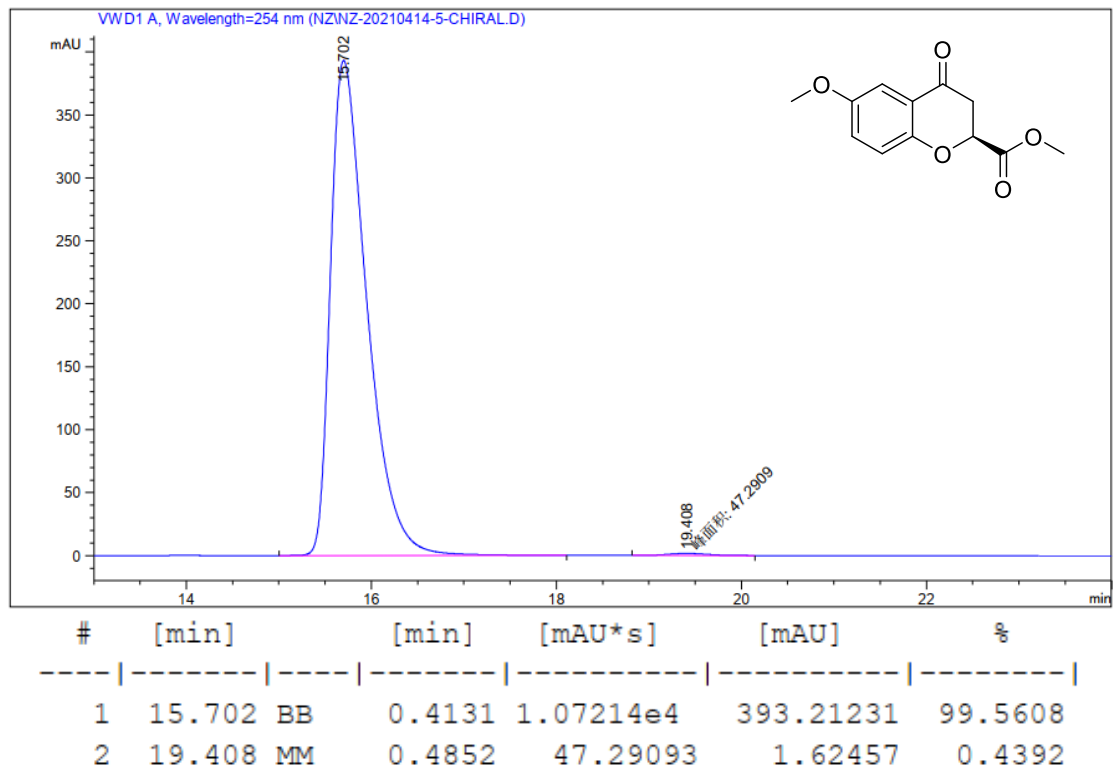

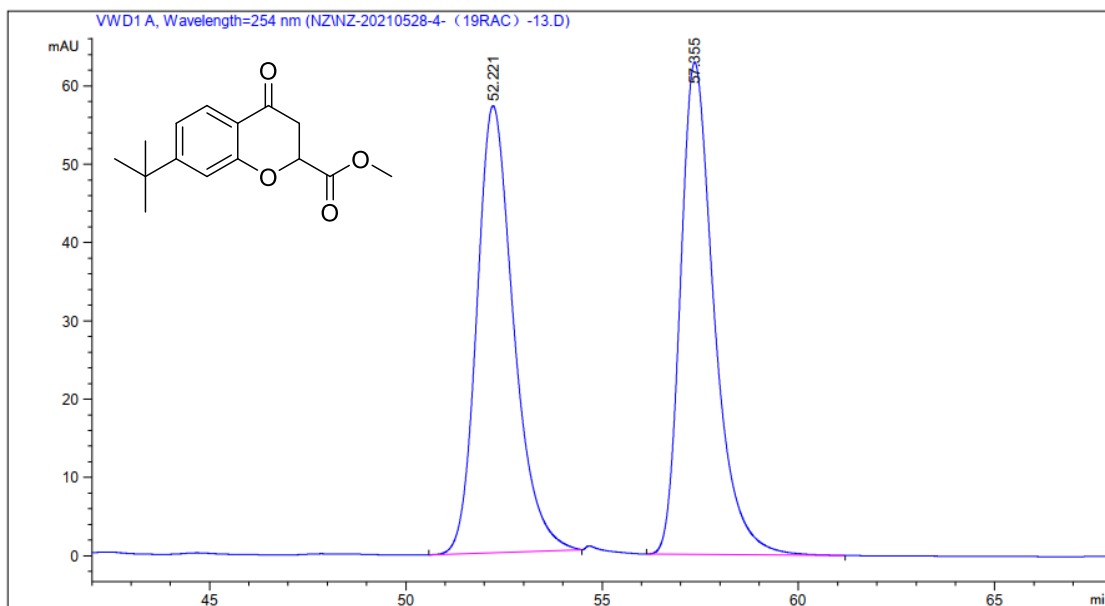

| # | [min]  | [min] | [mAU*s] | [mAU]      | %        |         |
|---|--------|-------|---------|------------|----------|---------|
| 1 | 52.221 | BB    | 0.9821  | 3713.38062 | 57.07147 | 49.7561 |
| 2 | 57.355 | BB    | 0.9012  | 3749.77930 | 62.84079 | 50.2439 |

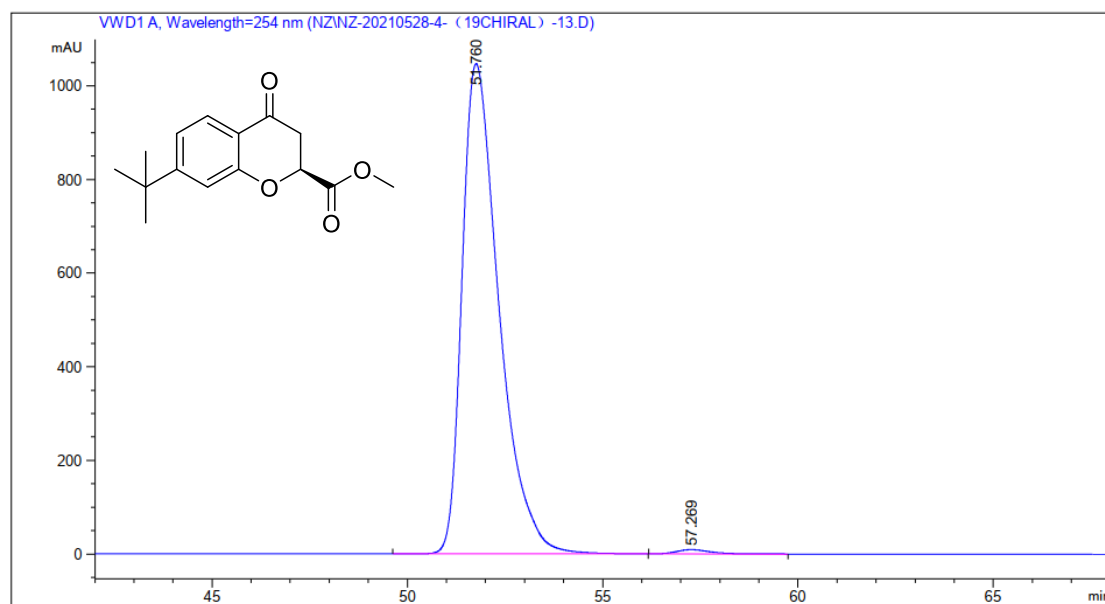

| # | [min]  | [min] | [mAU*s] | [mAU]     | %          |         |
|---|--------|-------|---------|-----------|------------|---------|
| 1 | 51.760 | BB    | 0.9980  | 6.86516e4 | 1047.04053 | 99.2298 |
| 2 | 57.269 | BB    | 0.8782  | 532.82947 | 9.00704    | 0.7702  |

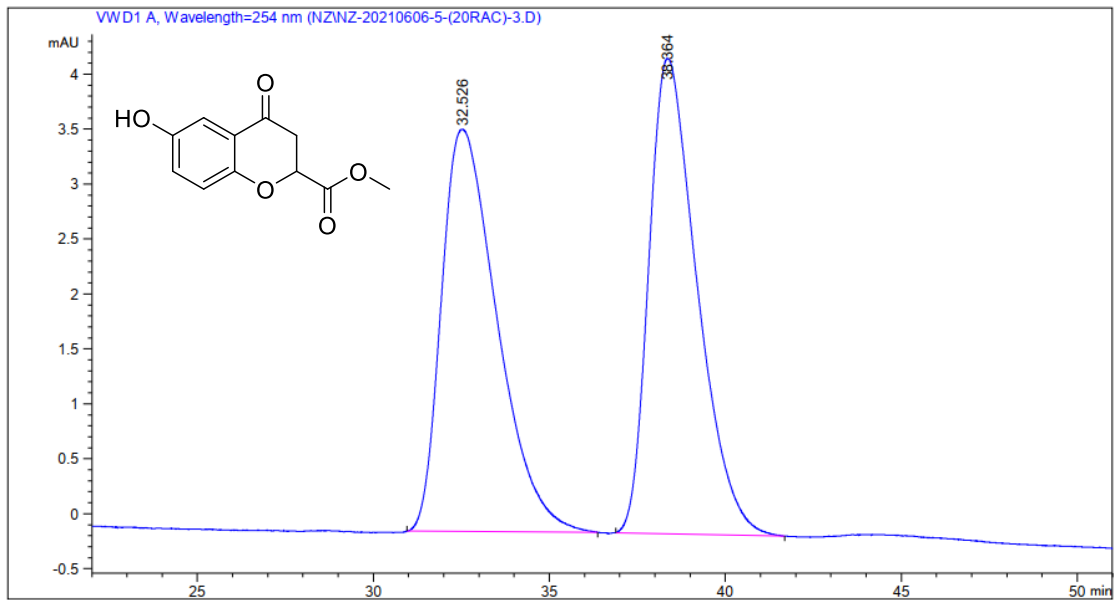

| # | [min]  | [min] | [mAU*s] | [mAU]     | %       |         |
|---|--------|-------|---------|-----------|---------|---------|
| 1 | 32.526 | BB    | 1.2894  | 401.59351 | 3.65931 | 49.4285 |
| 2 | 38.364 | BB    | 1.1446  | 410.87961 | 4.32415 | 50.5715 |

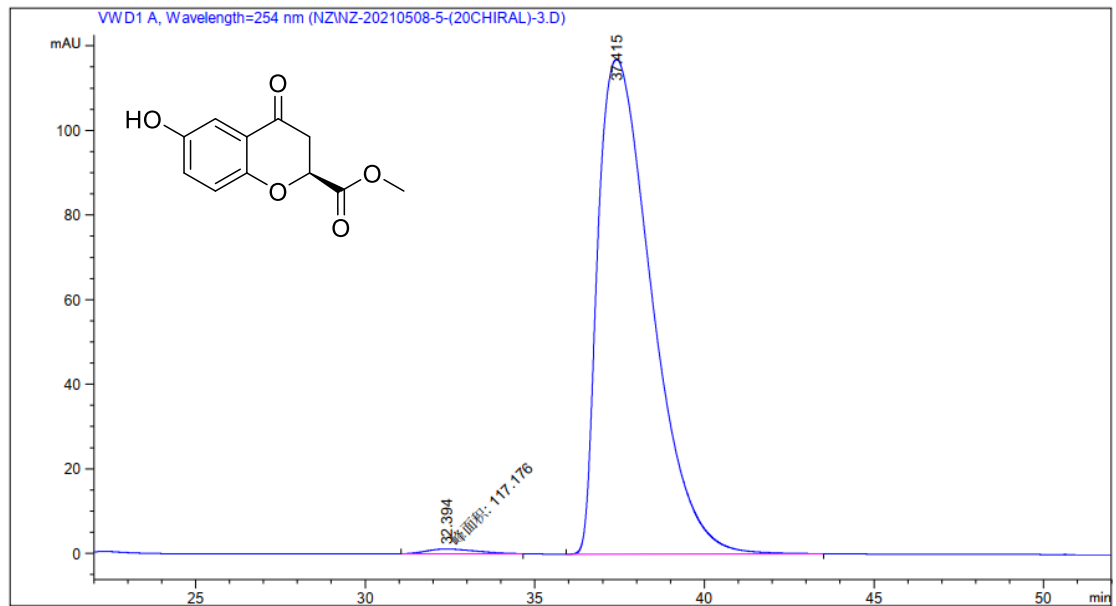

| # | [min]  | [min] | [mAU*s] | [mAU]     | %         |         |
|---|--------|-------|---------|-----------|-----------|---------|
| 1 | 32.394 | MM    | 1.7091  | 117.17614 | 1.14268   | 0.9043  |
| 2 | 37.415 | BB    | 1.7030  | 1.28400e4 | 116.93877 | 99.0957 |



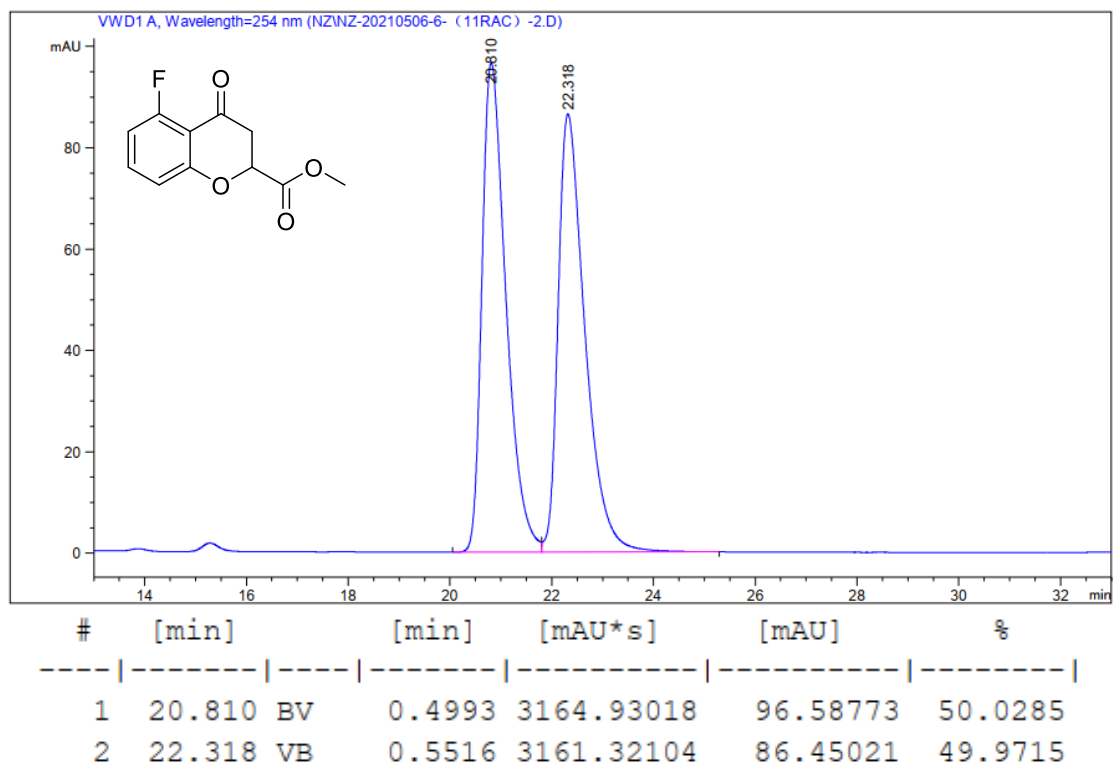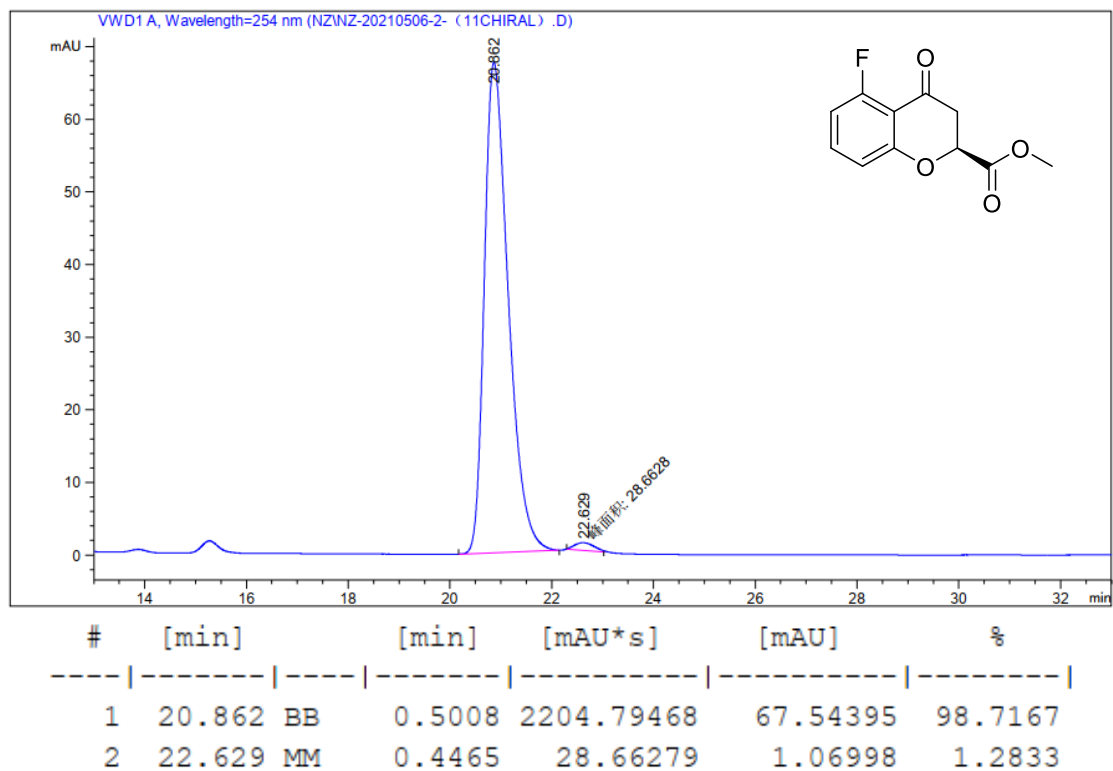

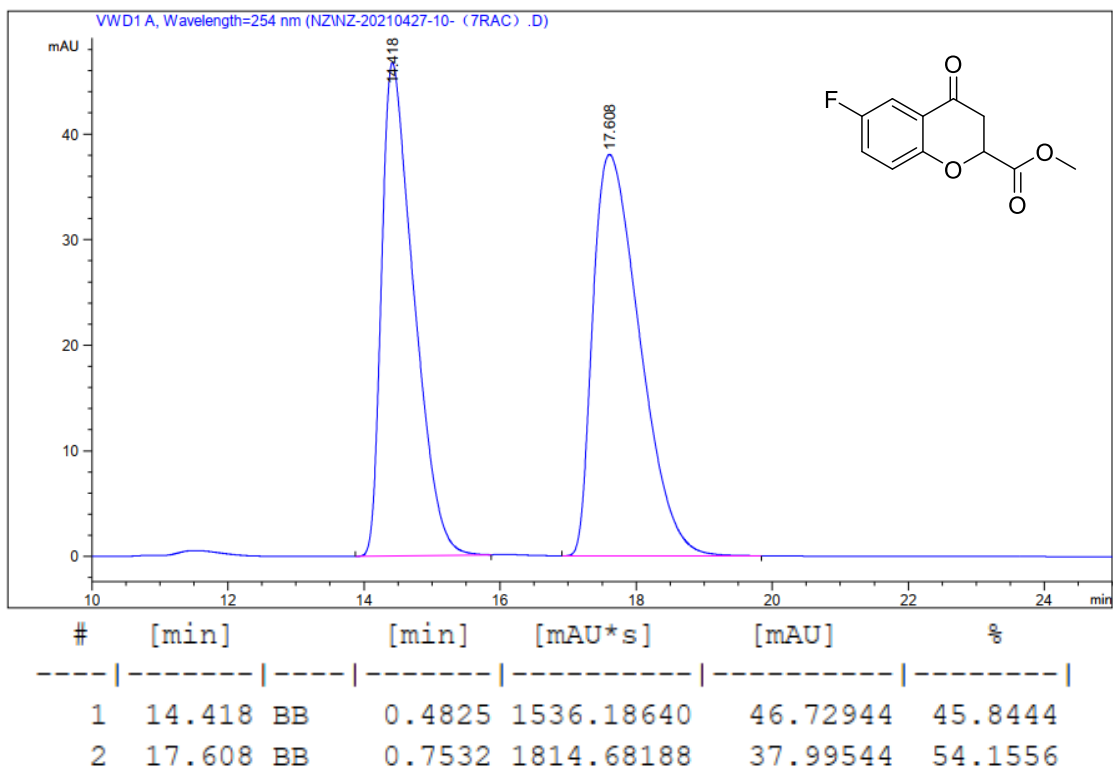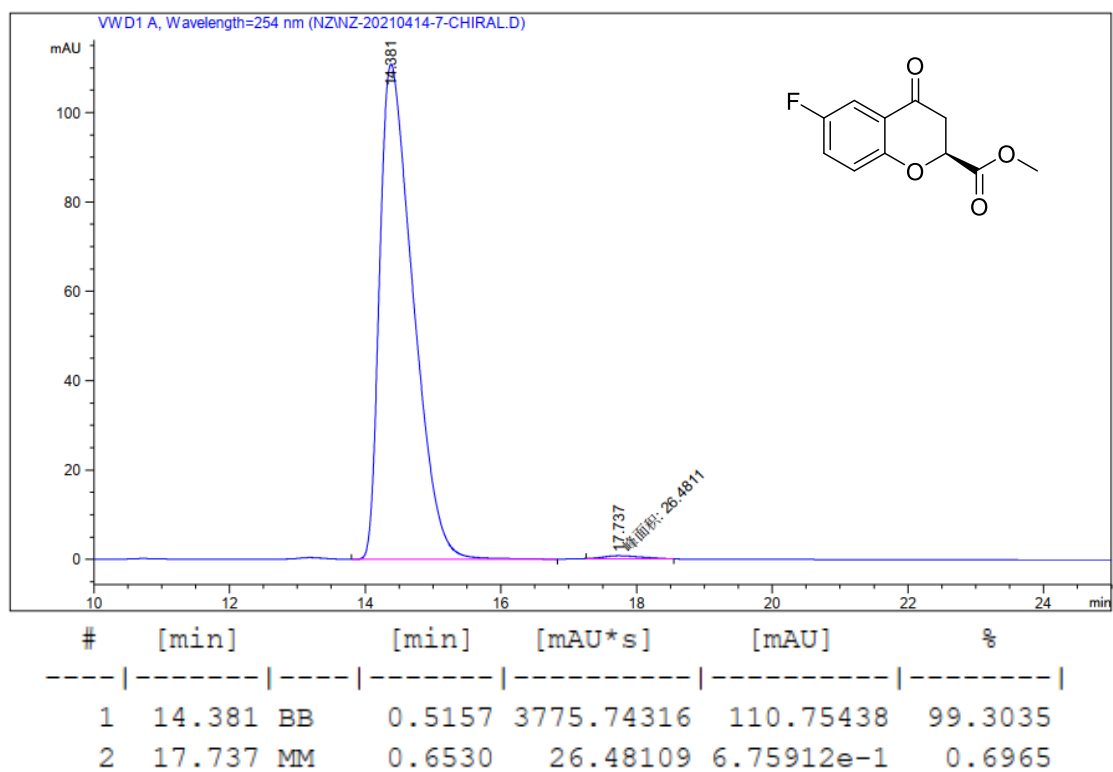

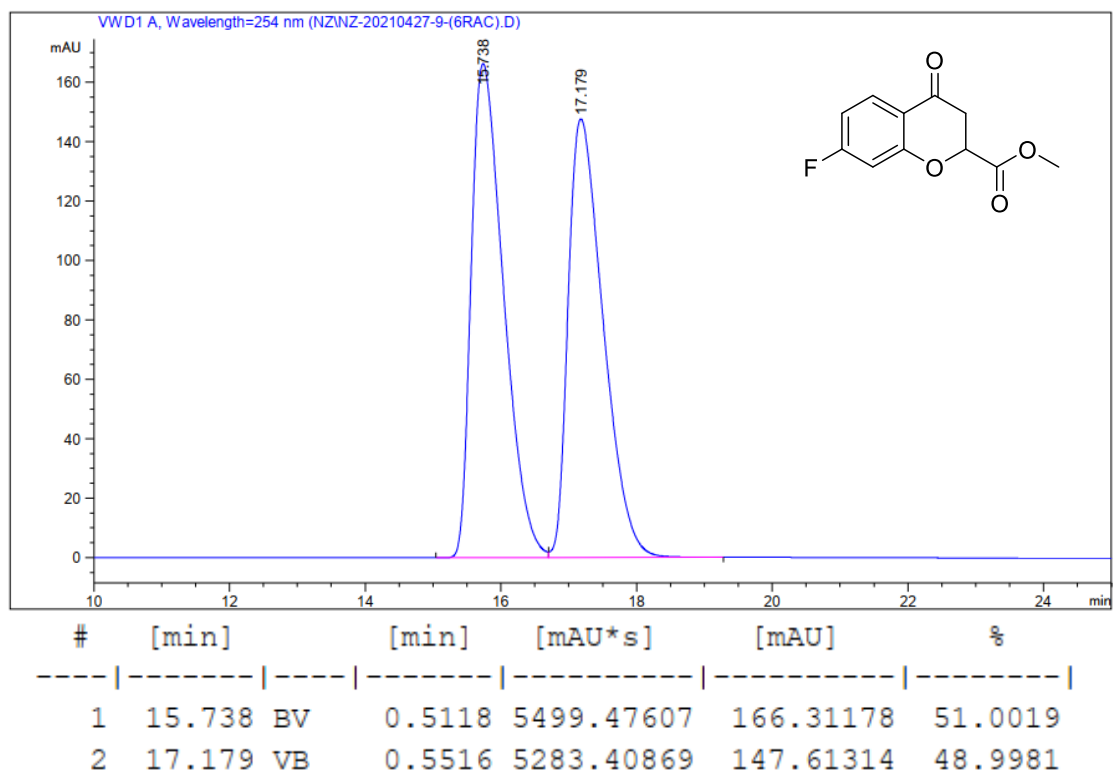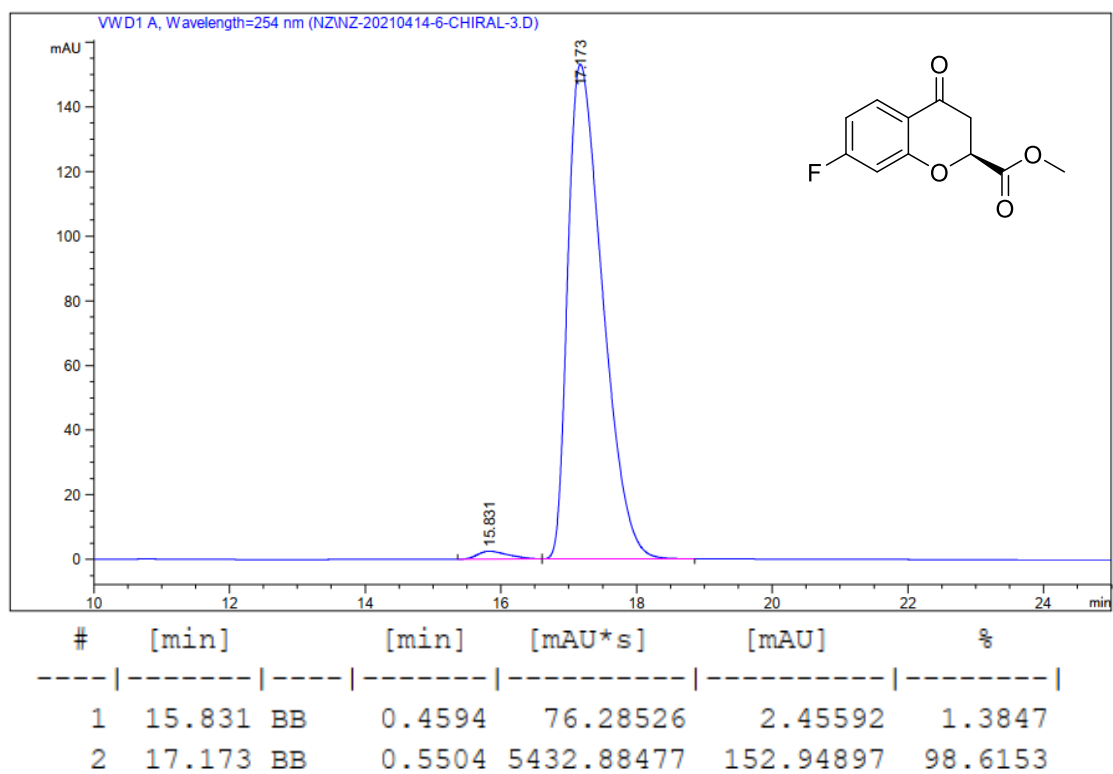

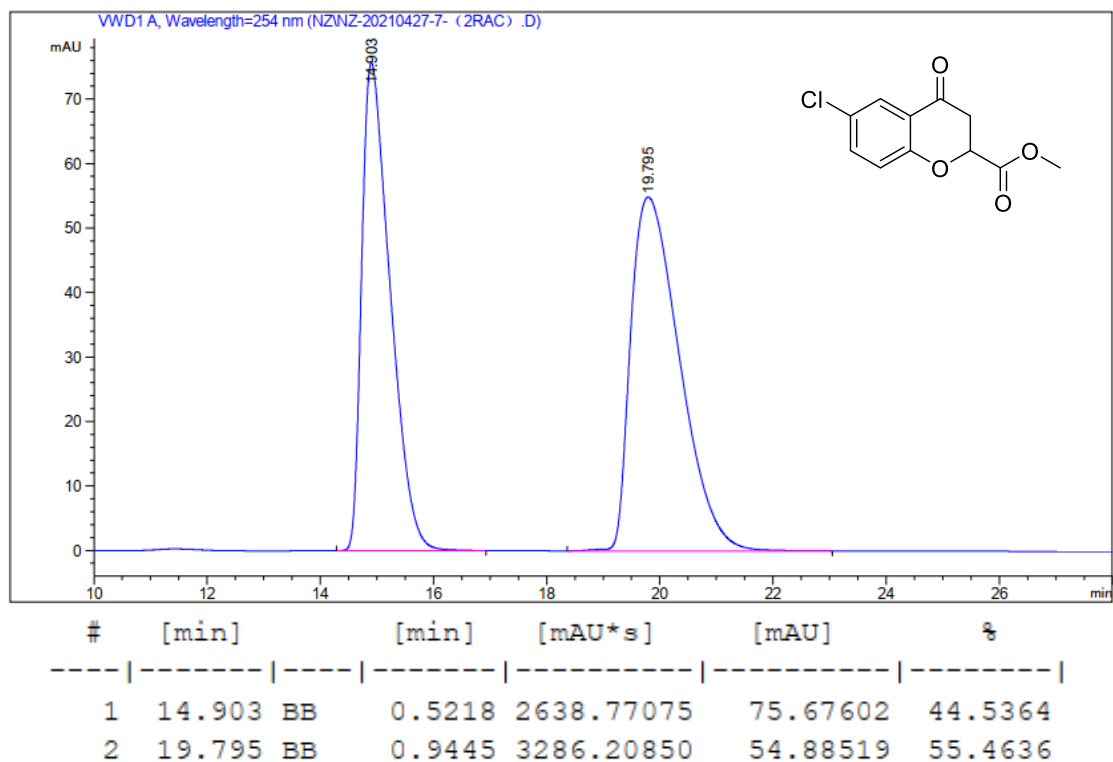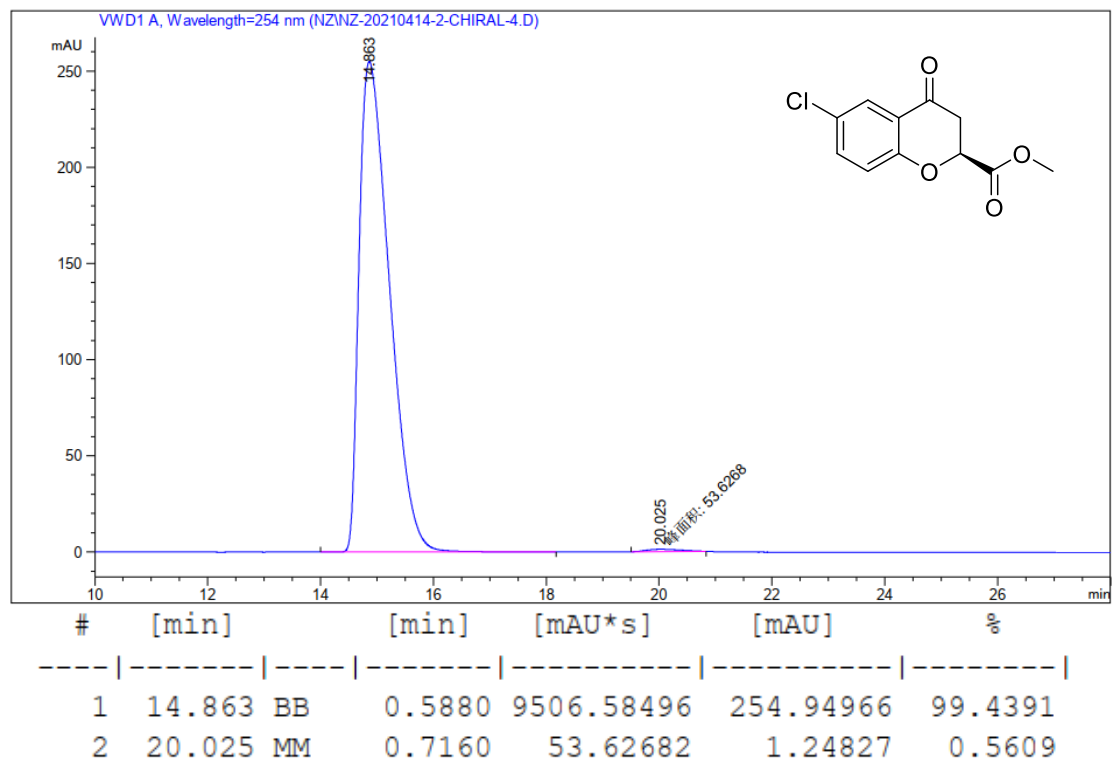

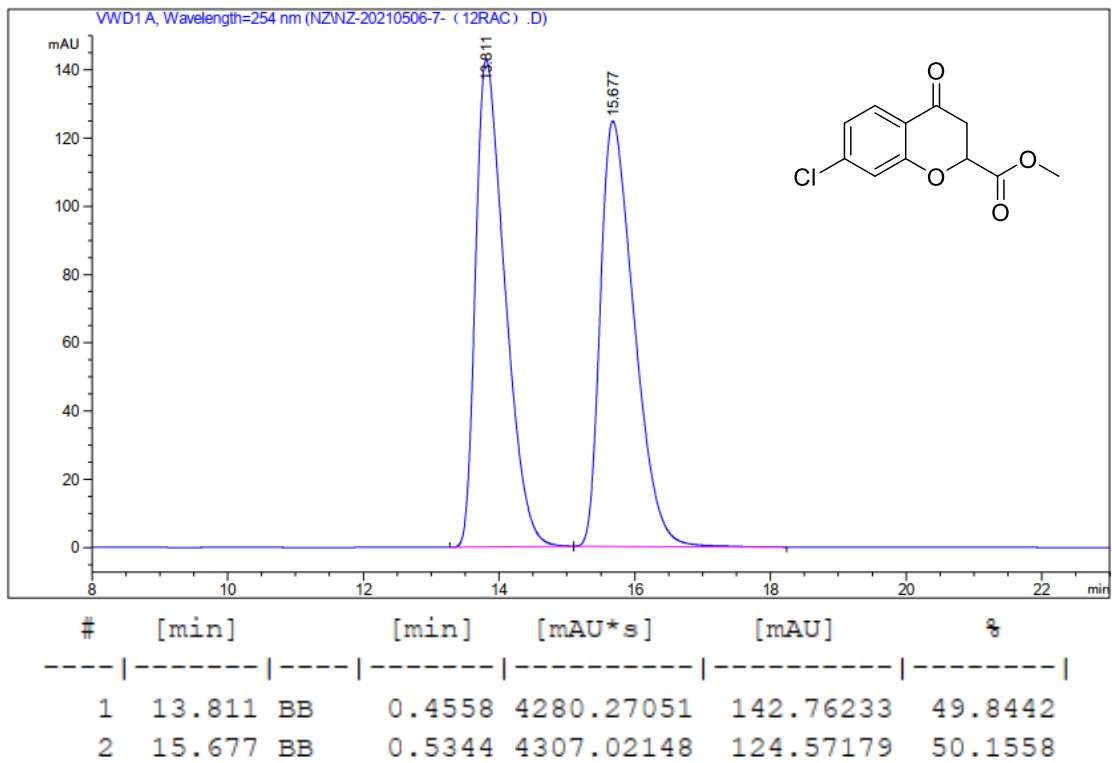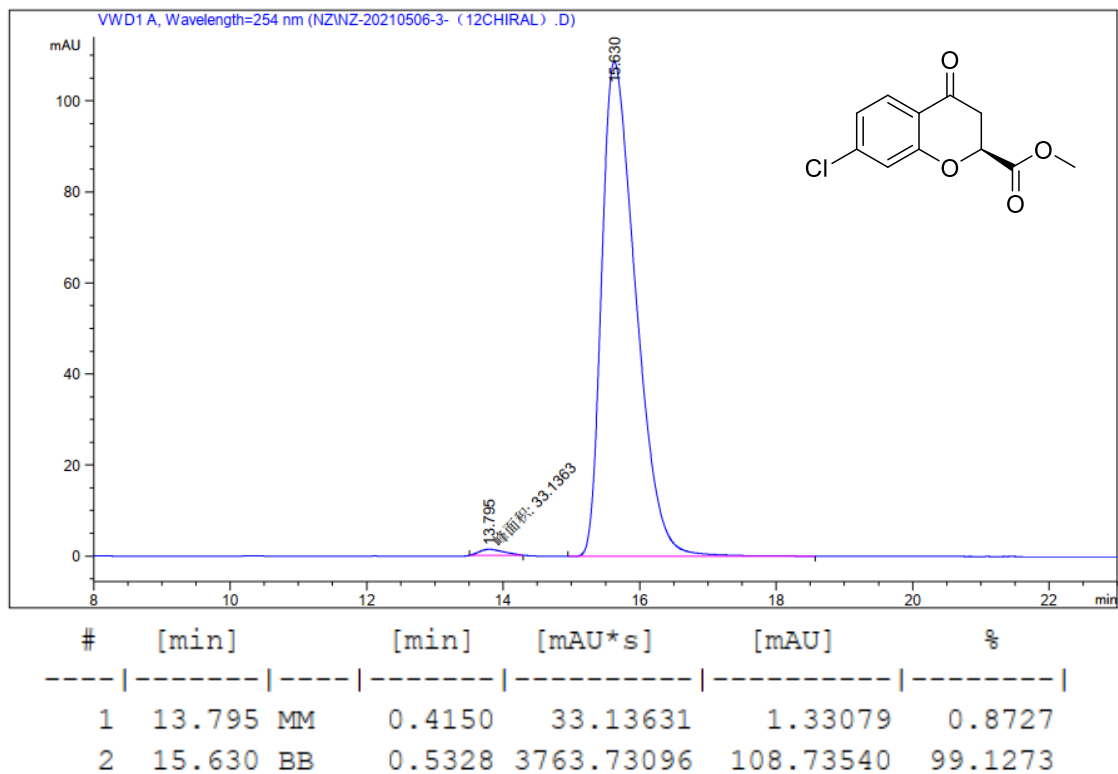

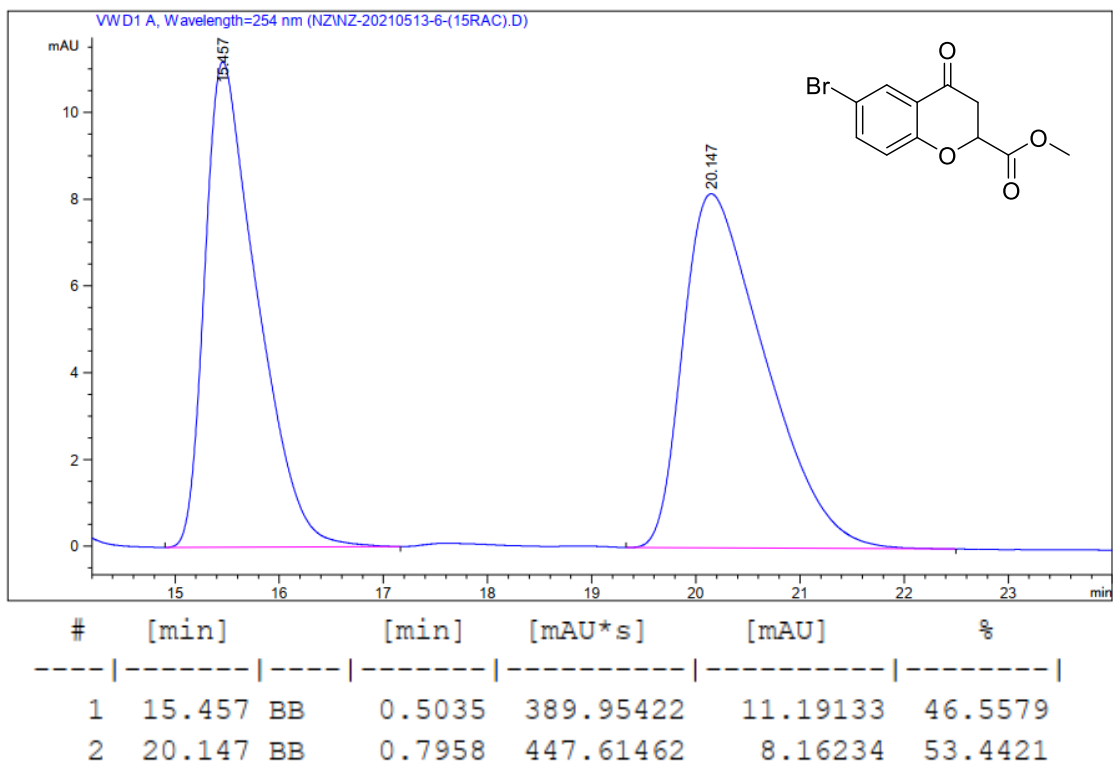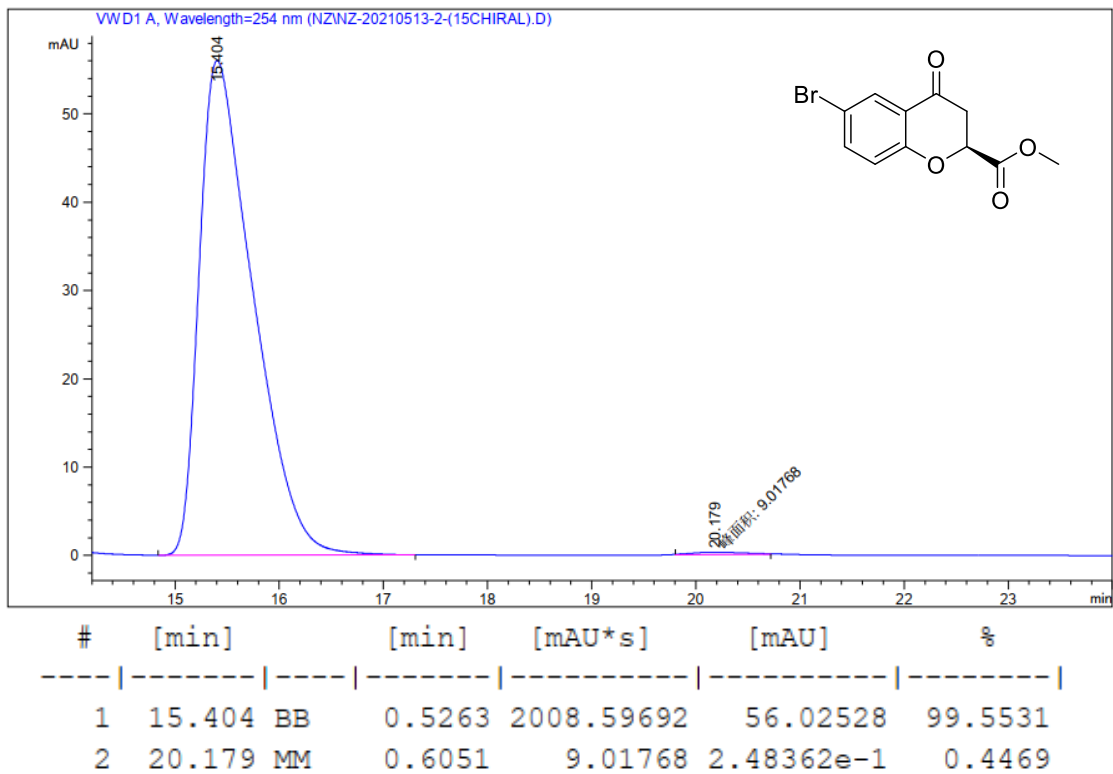

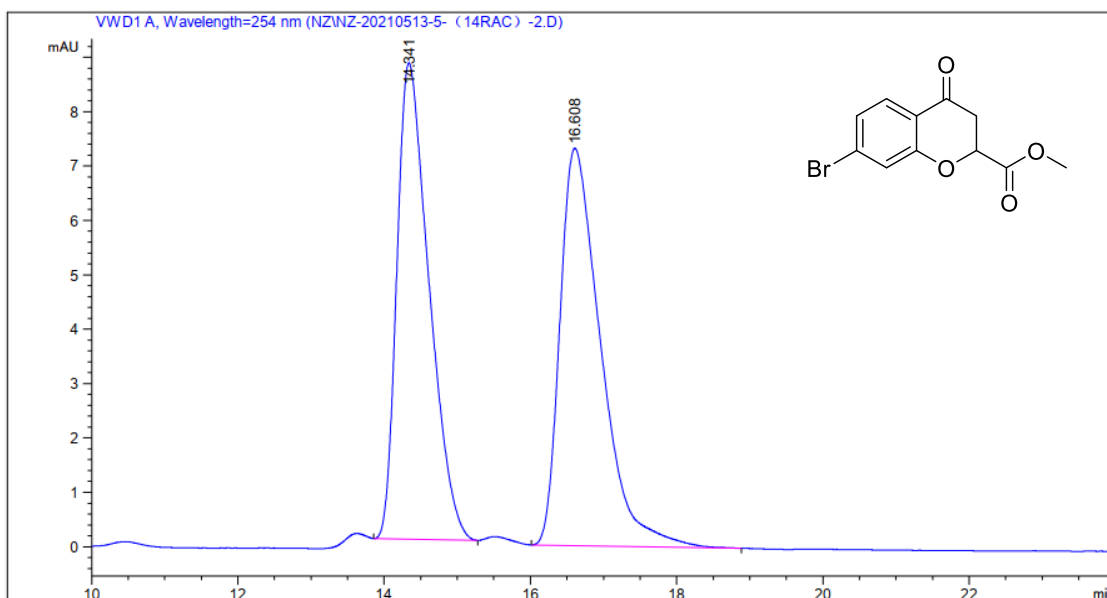

| # | [min]  |    | [min]  | [mAU*s]   | [mAU]   | %       |
|---|--------|----|--------|-----------|---------|---------|
| 1 | 14.341 | BB | 0.4536 | 266.96771 | 8.75865 | 48.6324 |
| 2 | 16.608 | BB | 0.5662 | 281.98279 | 7.30722 | 51.3676 |

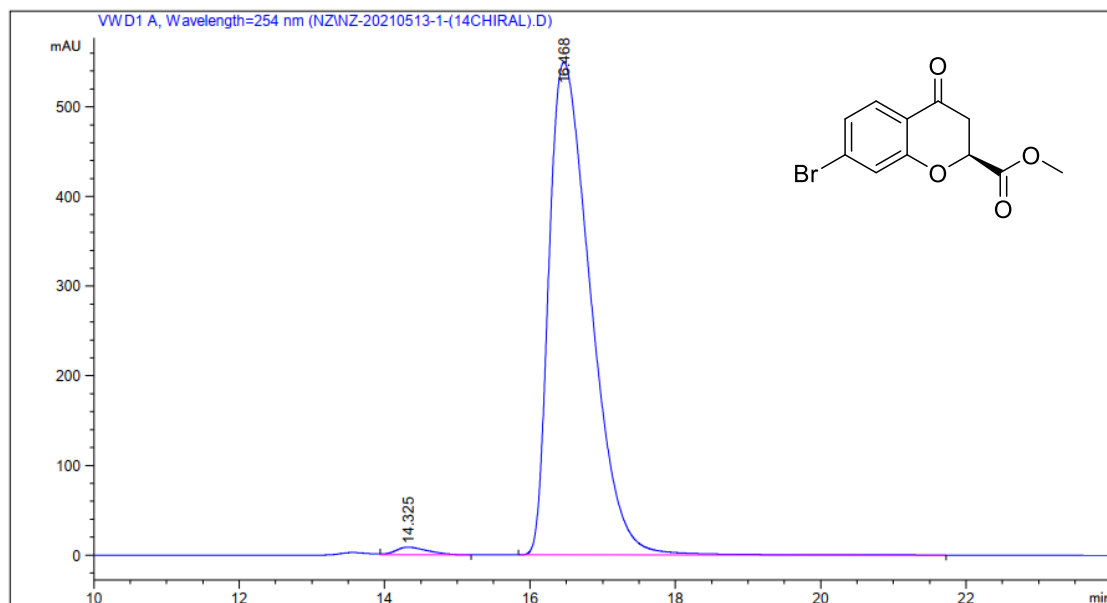

| # | [min]  |    | [min]  | [mAU*s]   | [mAU]     | %       |
|---|--------|----|--------|-----------|-----------|---------|
| 1 | 14.325 | VB | 0.4508 | 271.33249 | 8.79790   | 1.2326  |
| 2 | 16.468 | BB | 0.6165 | 2.17425e4 | 549.69641 | 98.7674 |

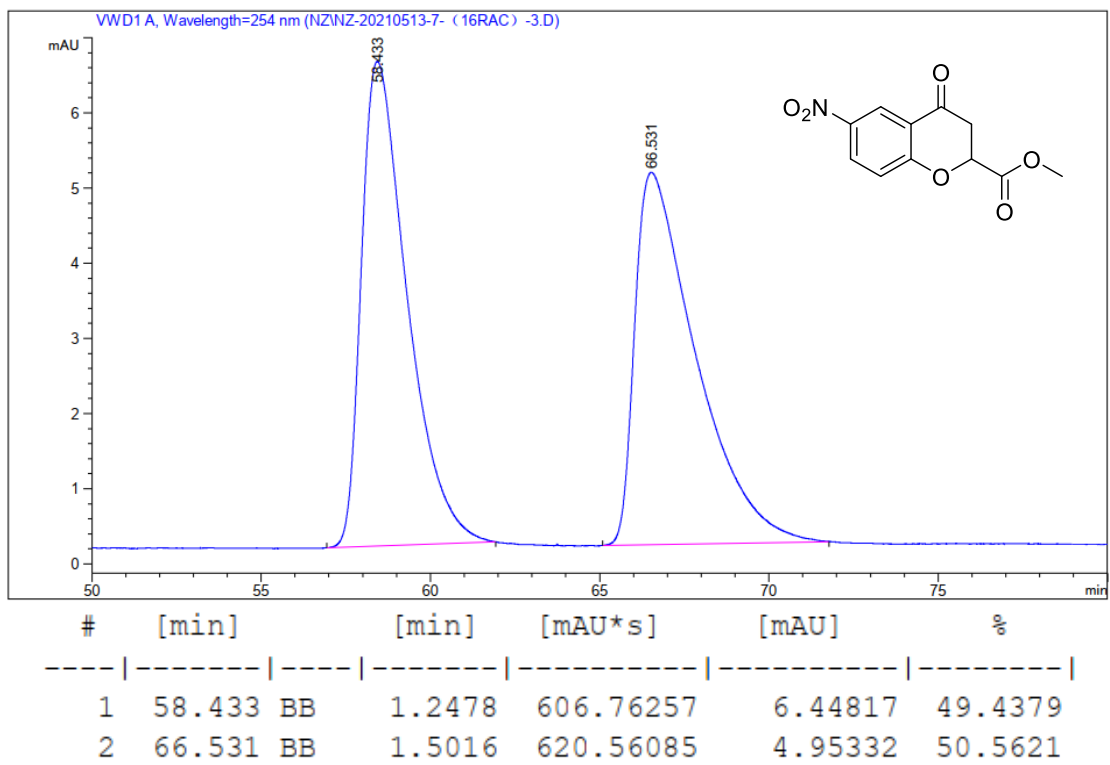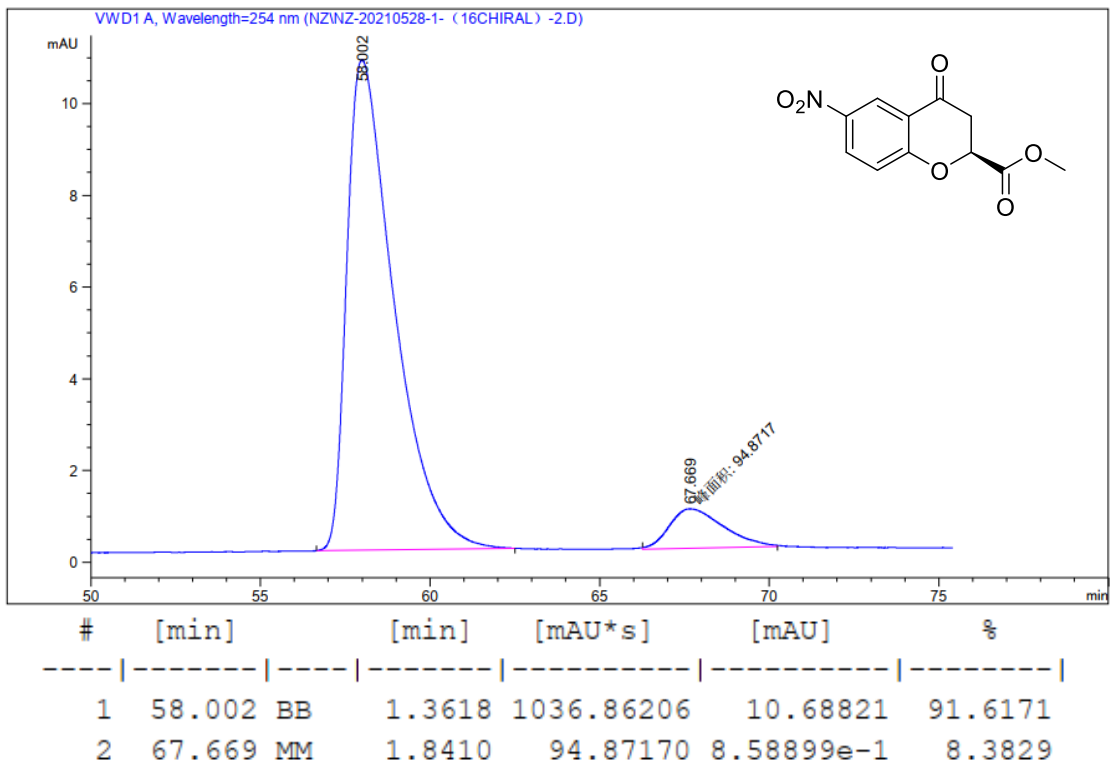



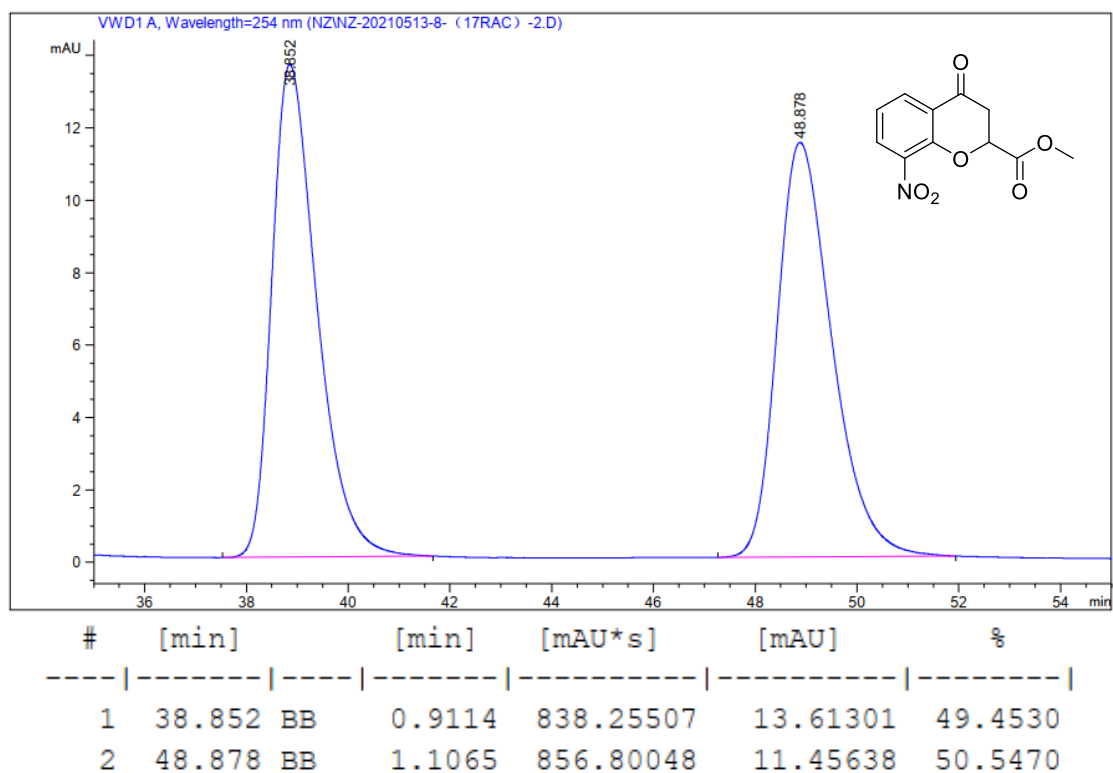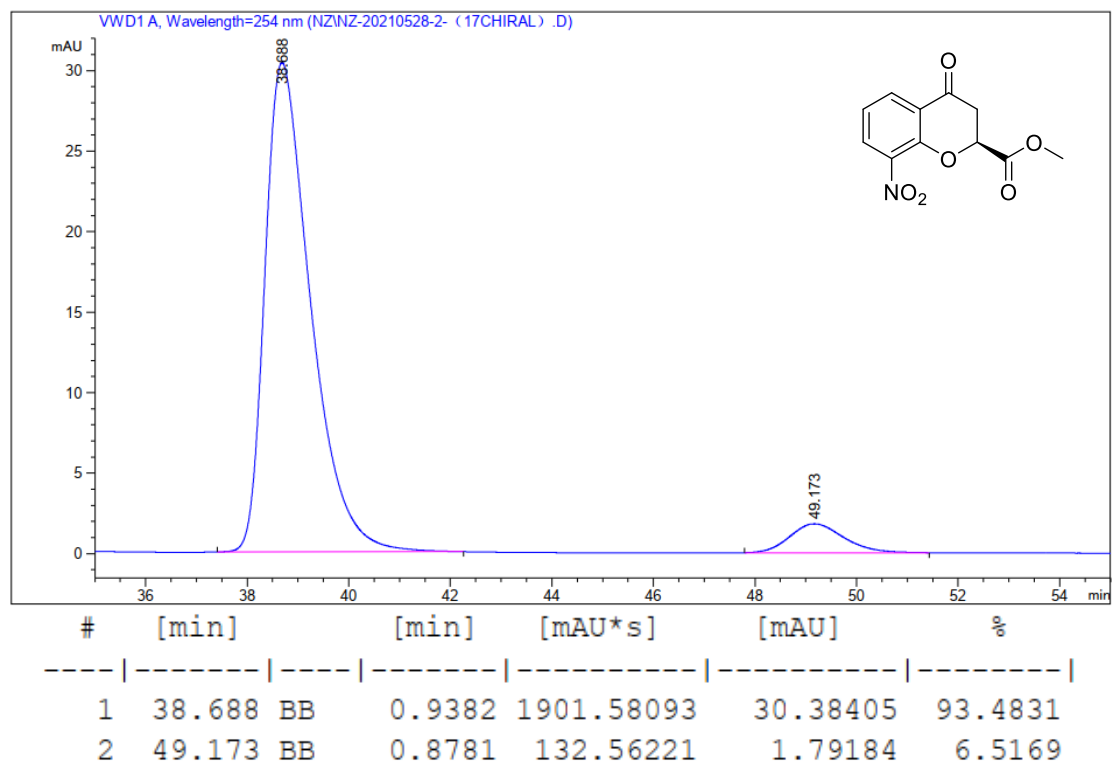

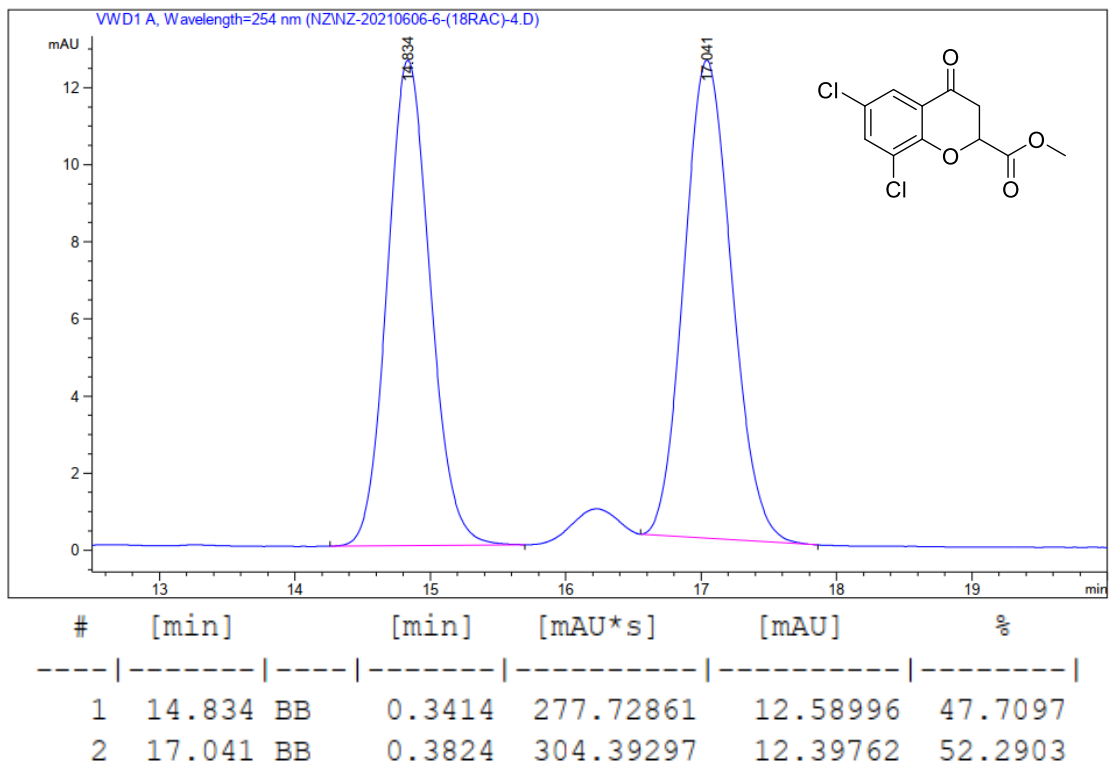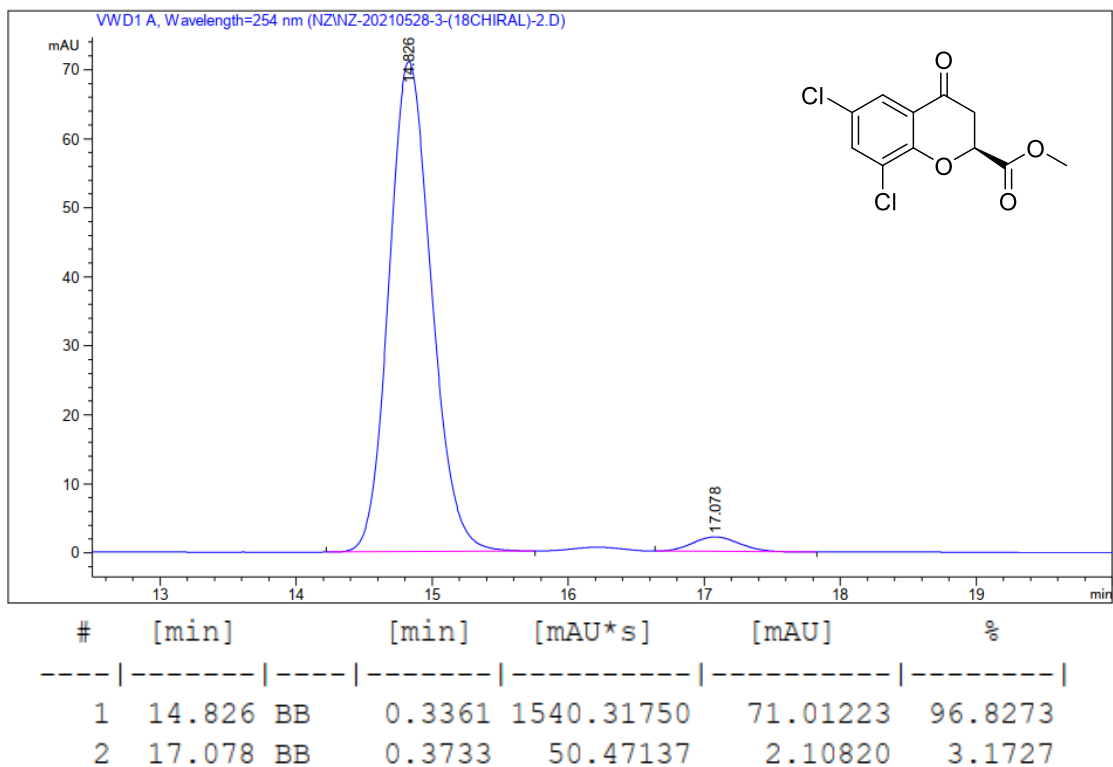

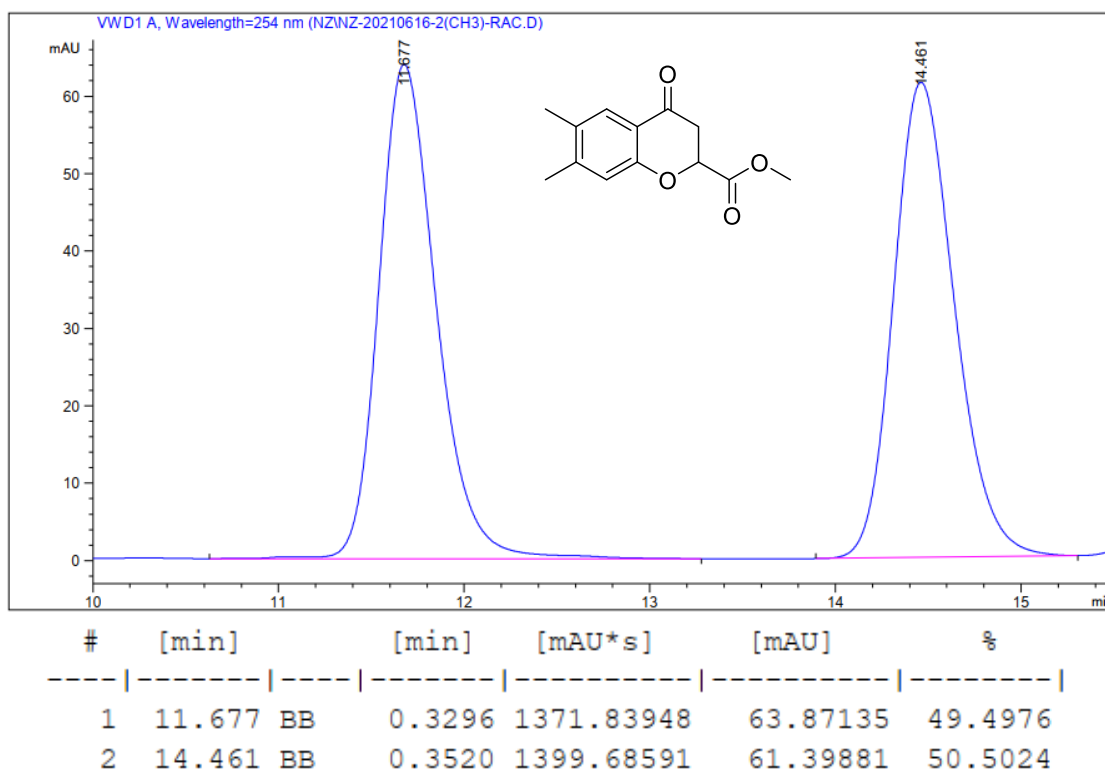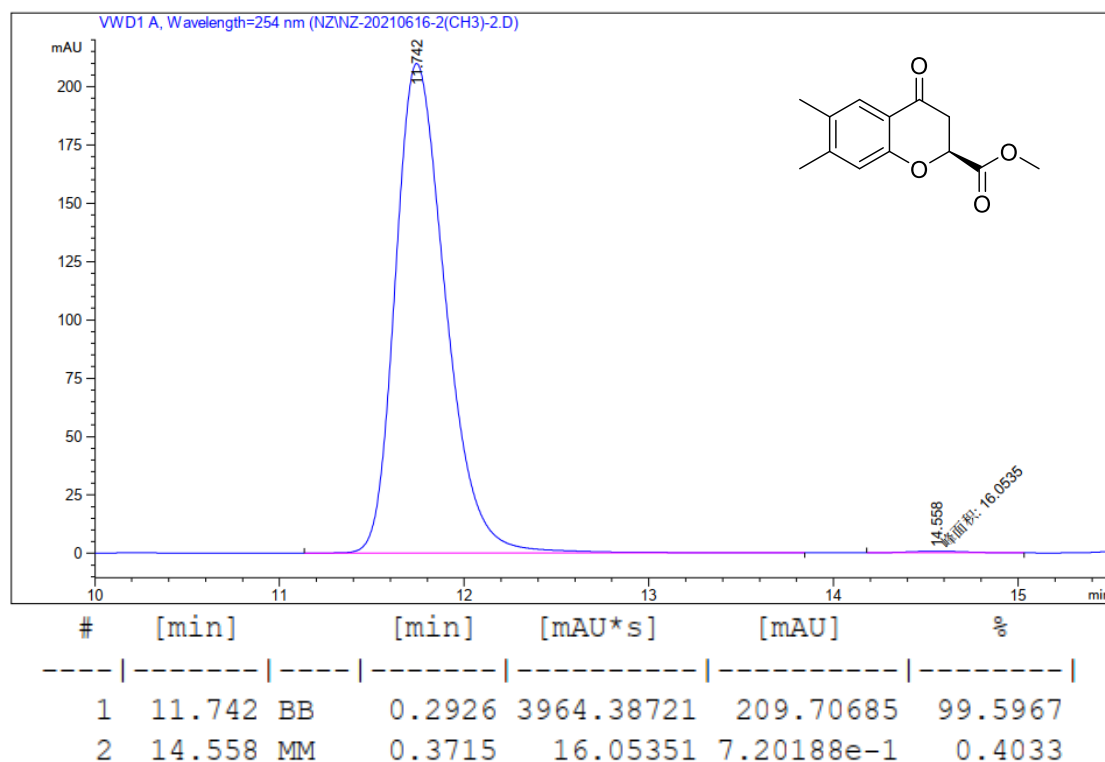

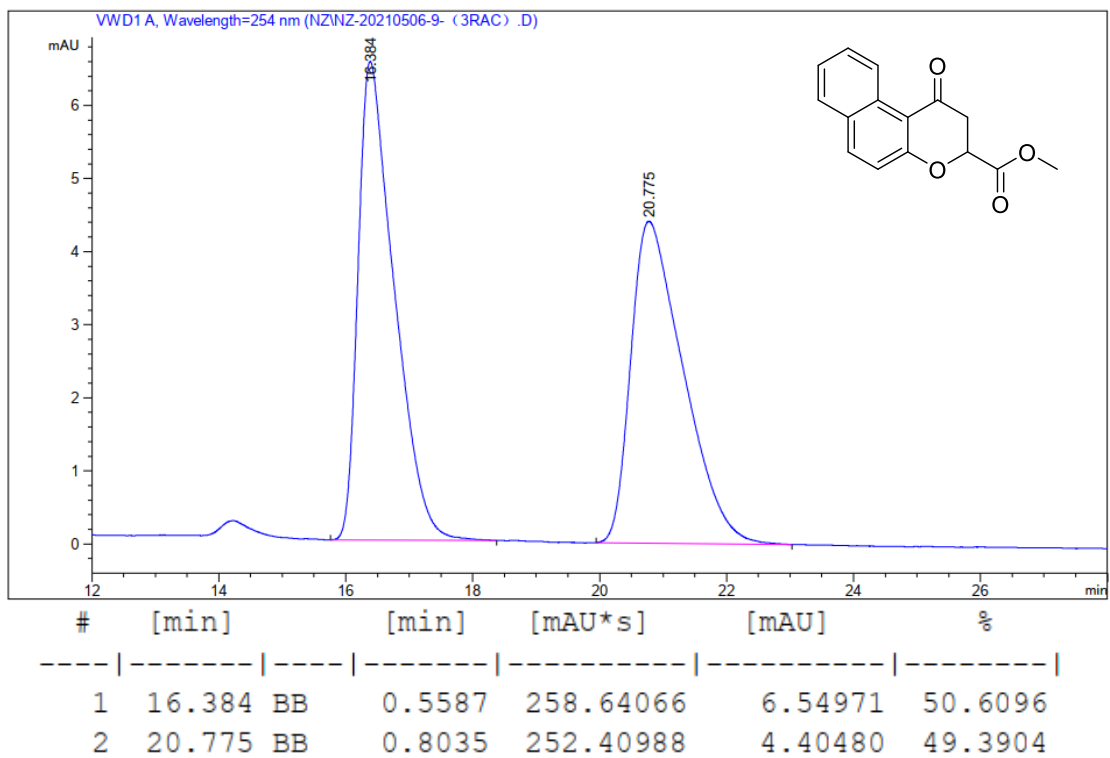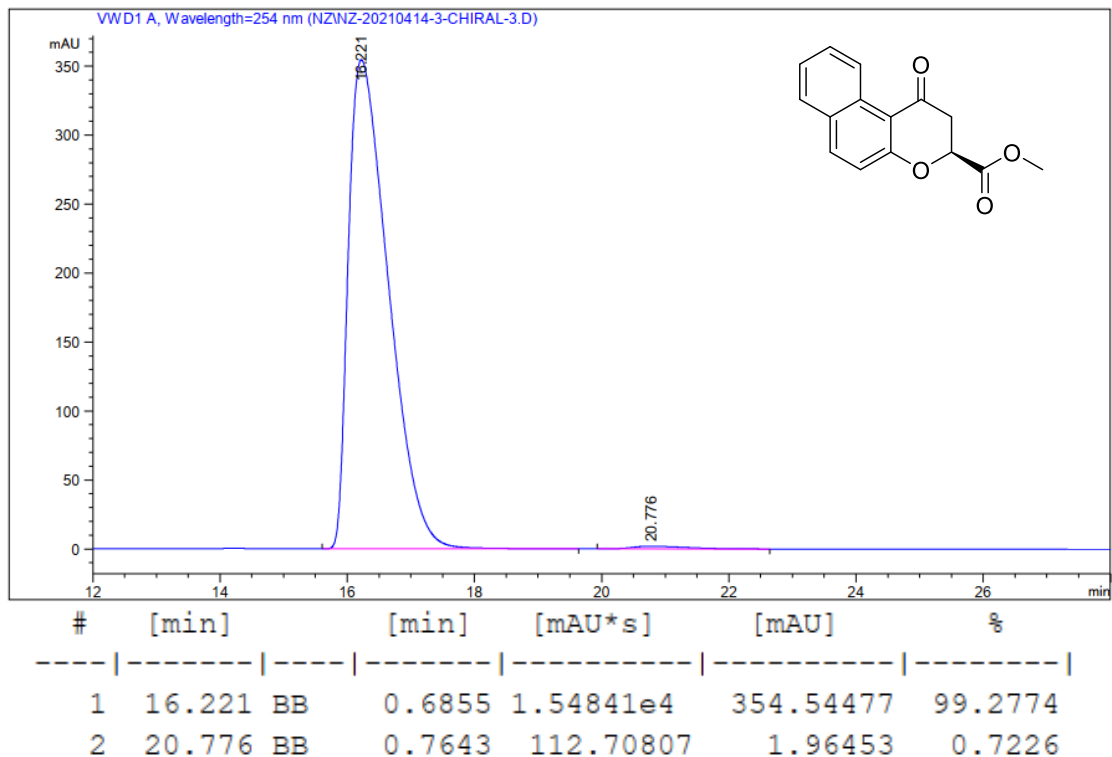

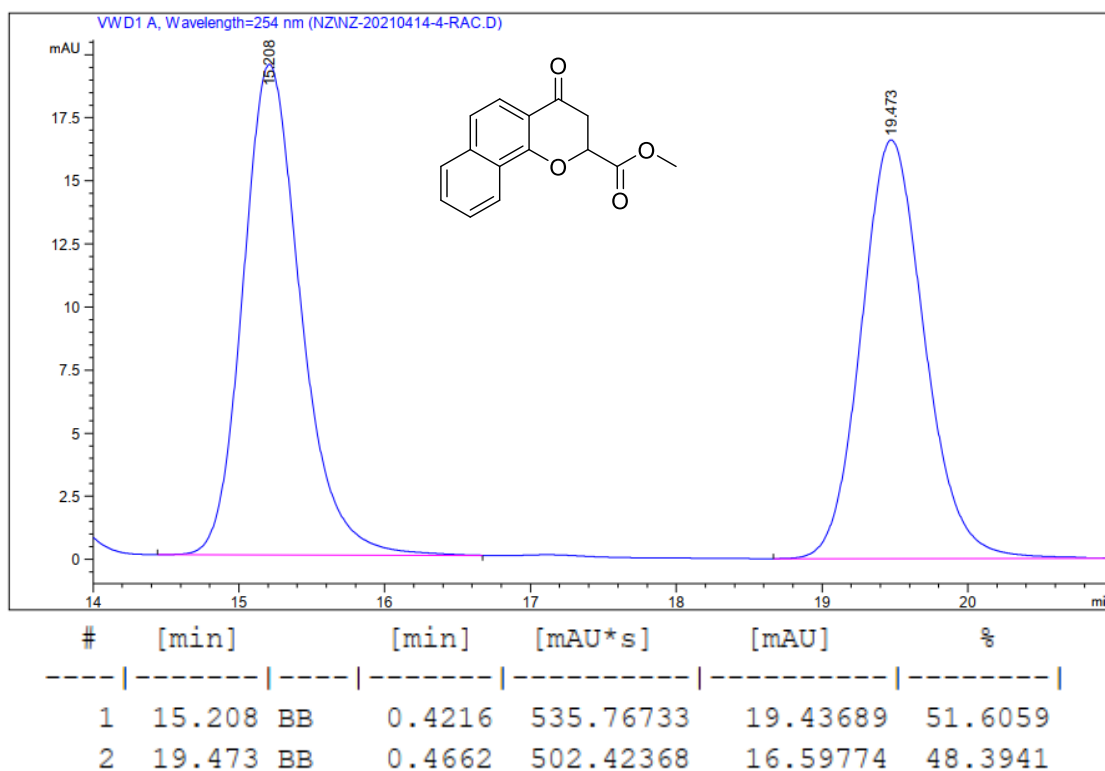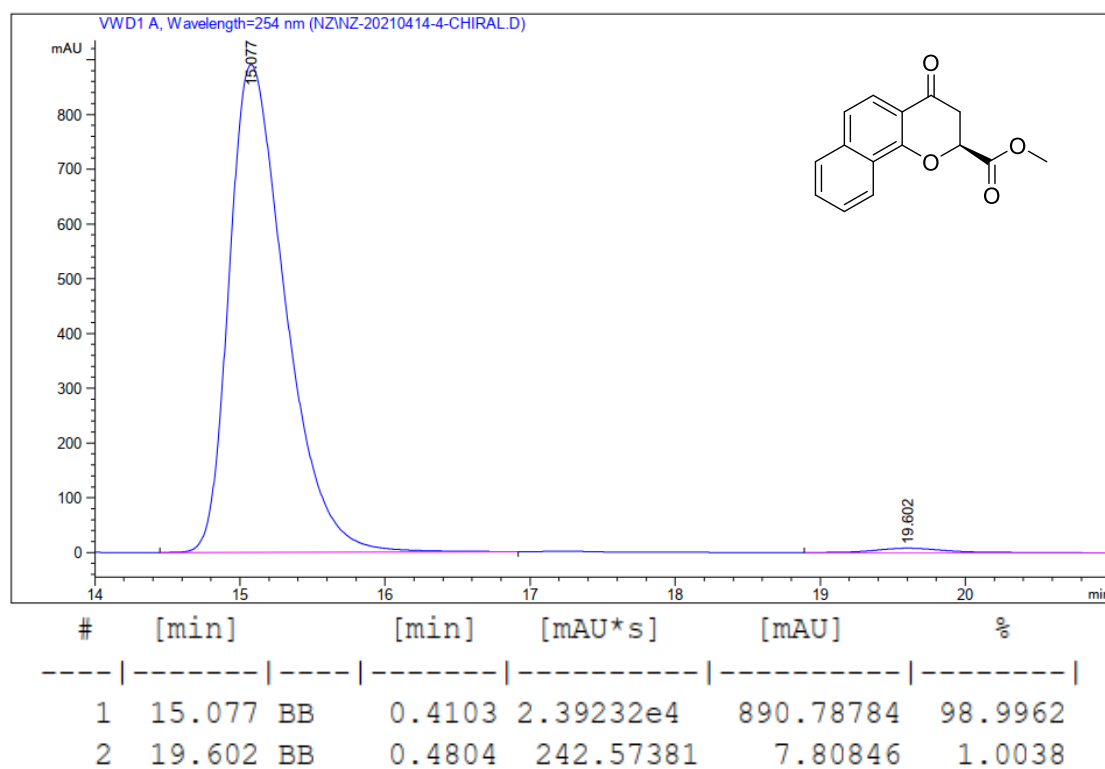

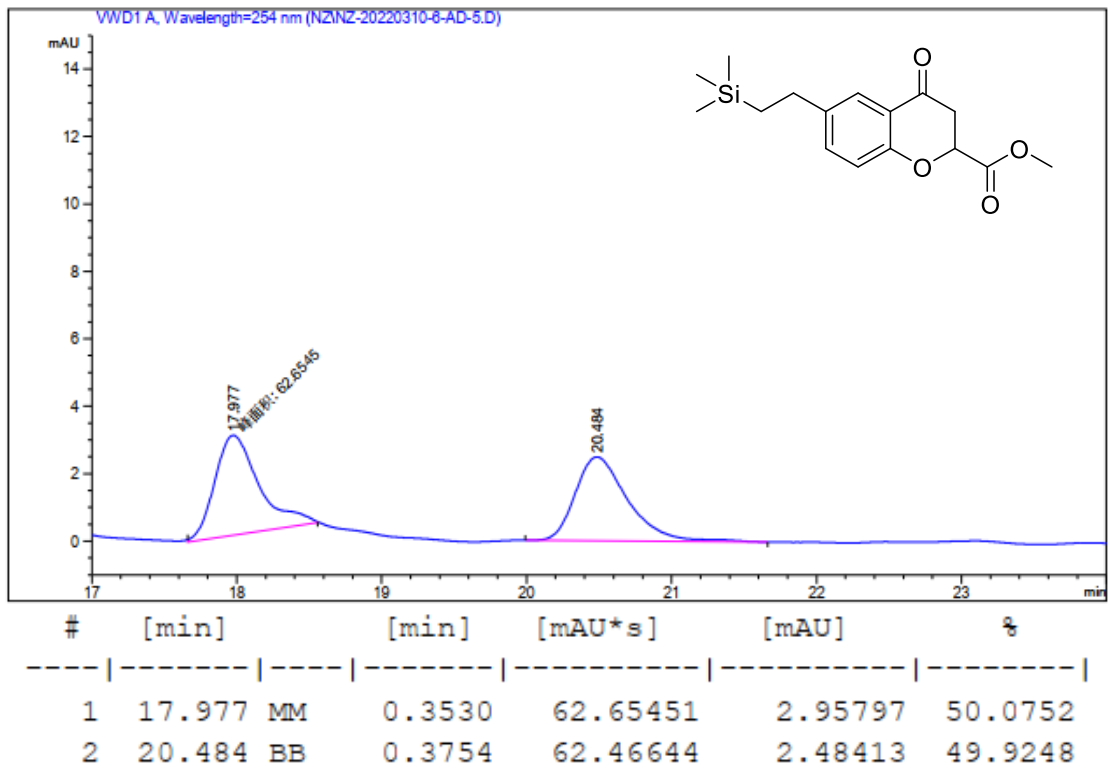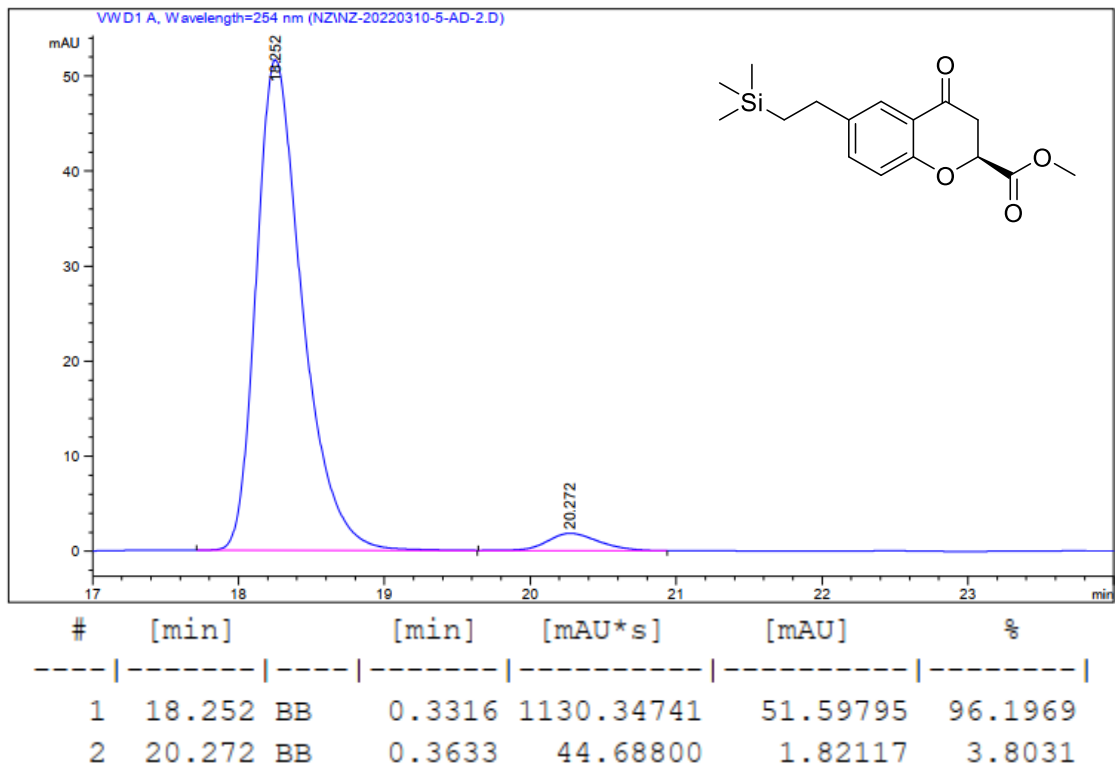

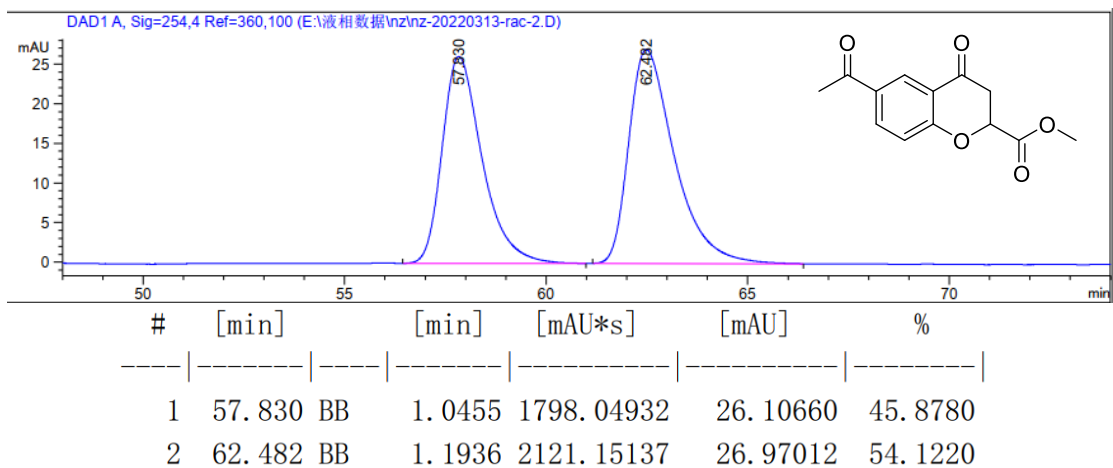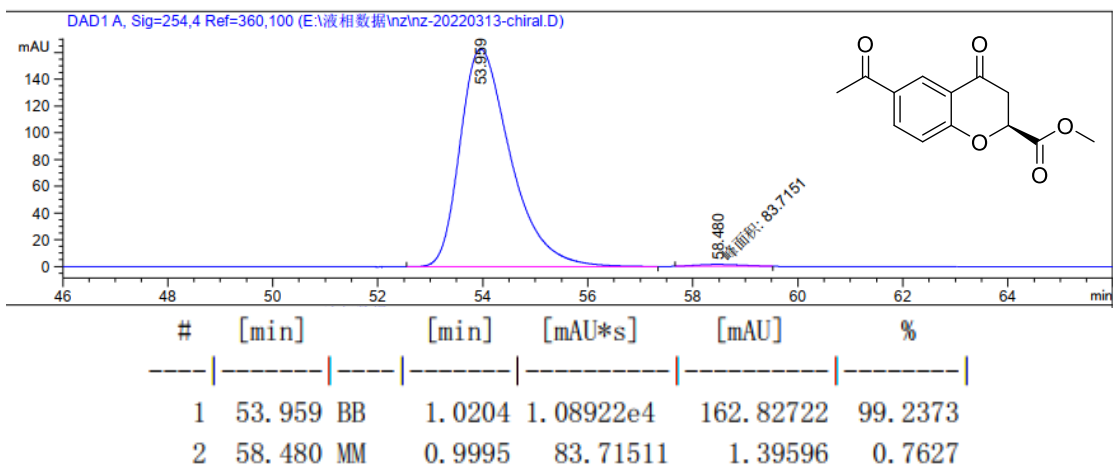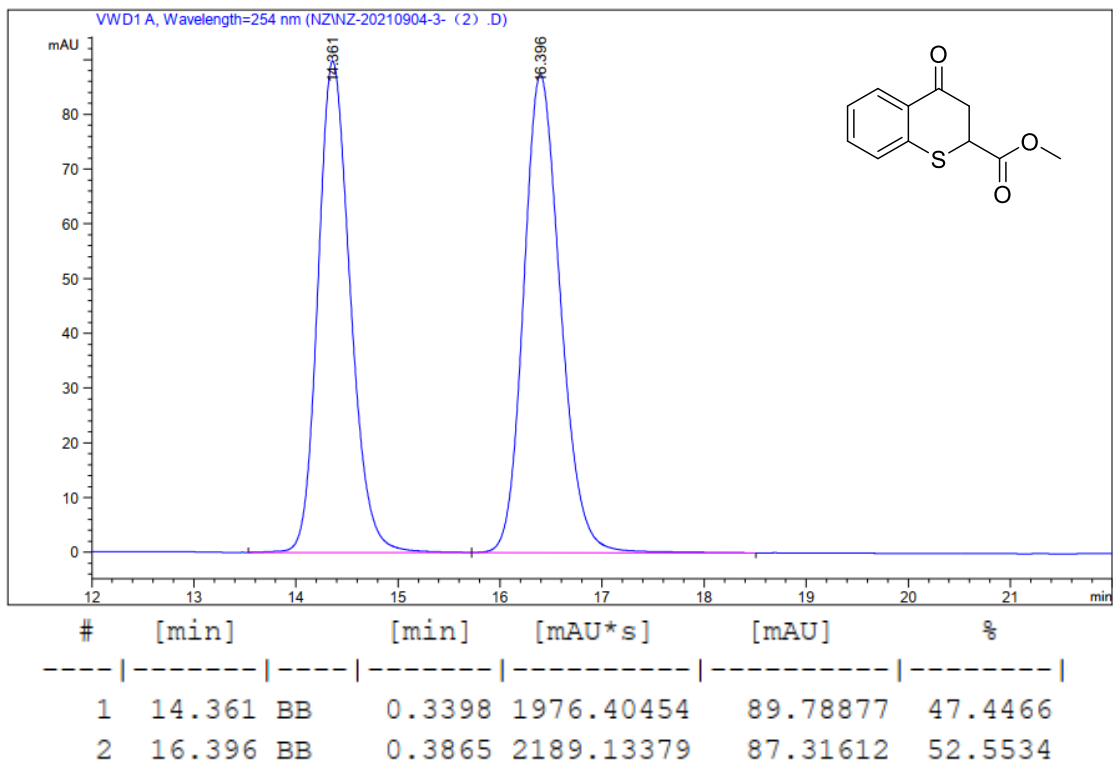

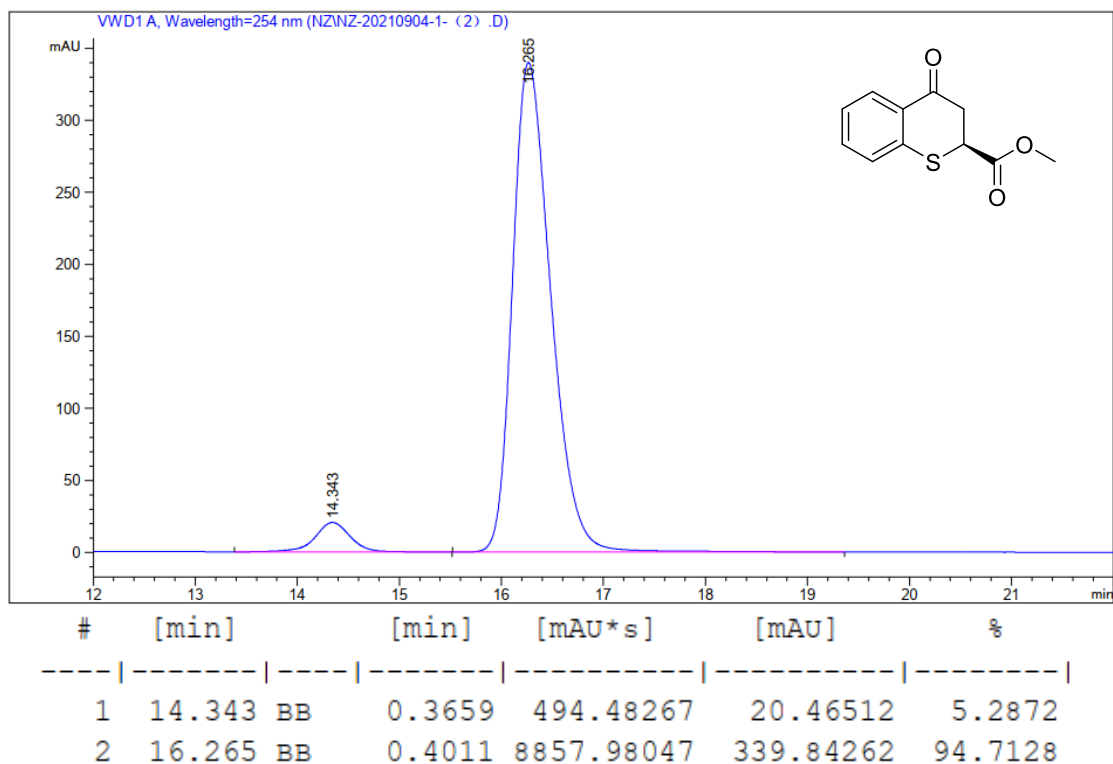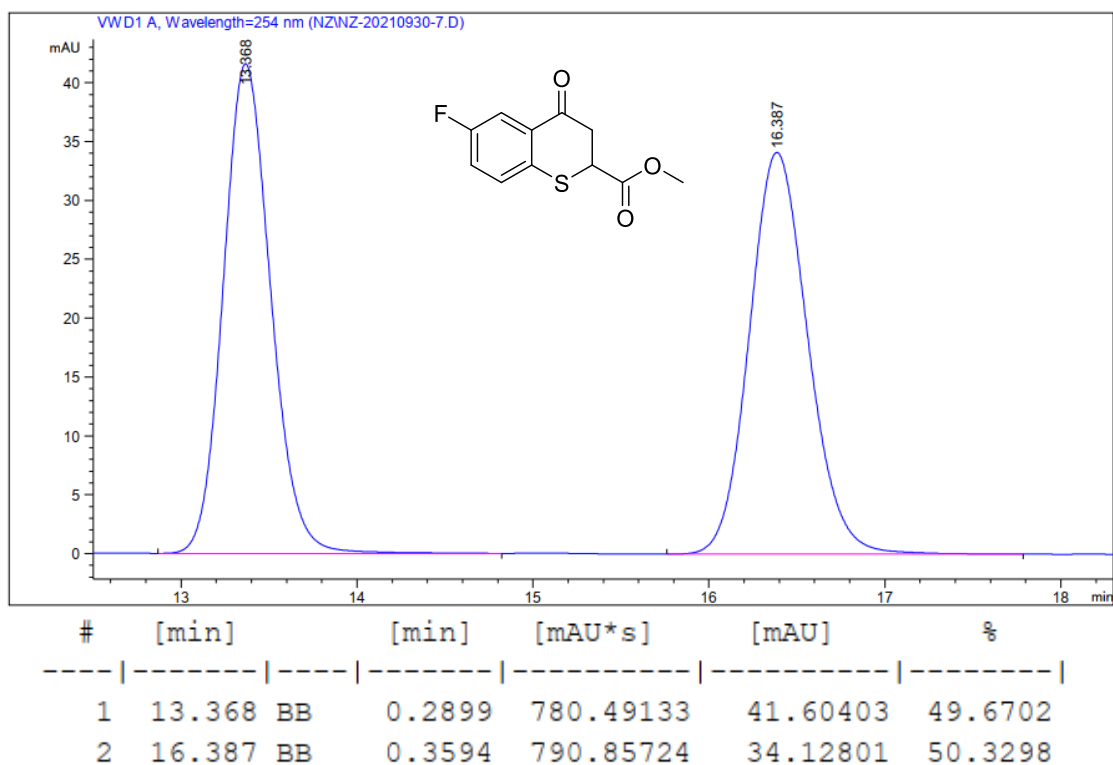



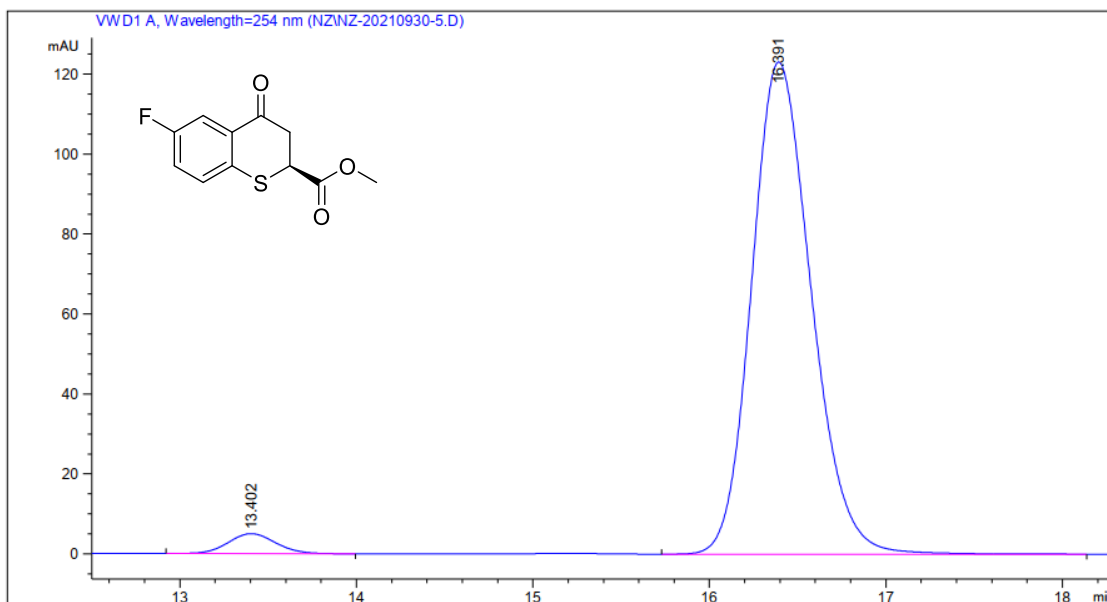

| # | [min]  | [min] | [mAU*s] | [mAU]      | %         |         |
|---|--------|-------|---------|------------|-----------|---------|
| 1 | 13.402 | BB    | 0.2898  | 92.99834   | 4.98139   | 3.1209  |
| 2 | 16.391 | BB    | 0.3637  | 2886.88770 | 123.05432 | 96.8791 |

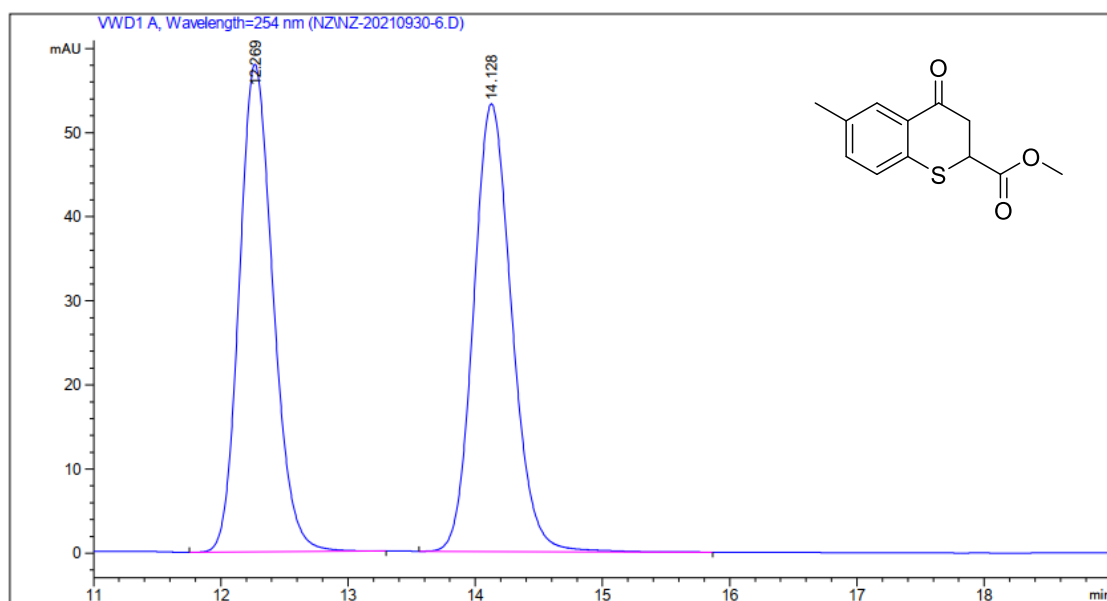

| # | [min]  | [min] | [mAU*s] | [mAU]      | %        |         |
|---|--------|-------|---------|------------|----------|---------|
| 1 | 12.269 | BB    | 0.2853  | 1069.34460 | 57.94813 | 49.1108 |
| 2 | 14.128 | BB    | 0.3230  | 1108.06982 | 53.20356 | 50.8892 |

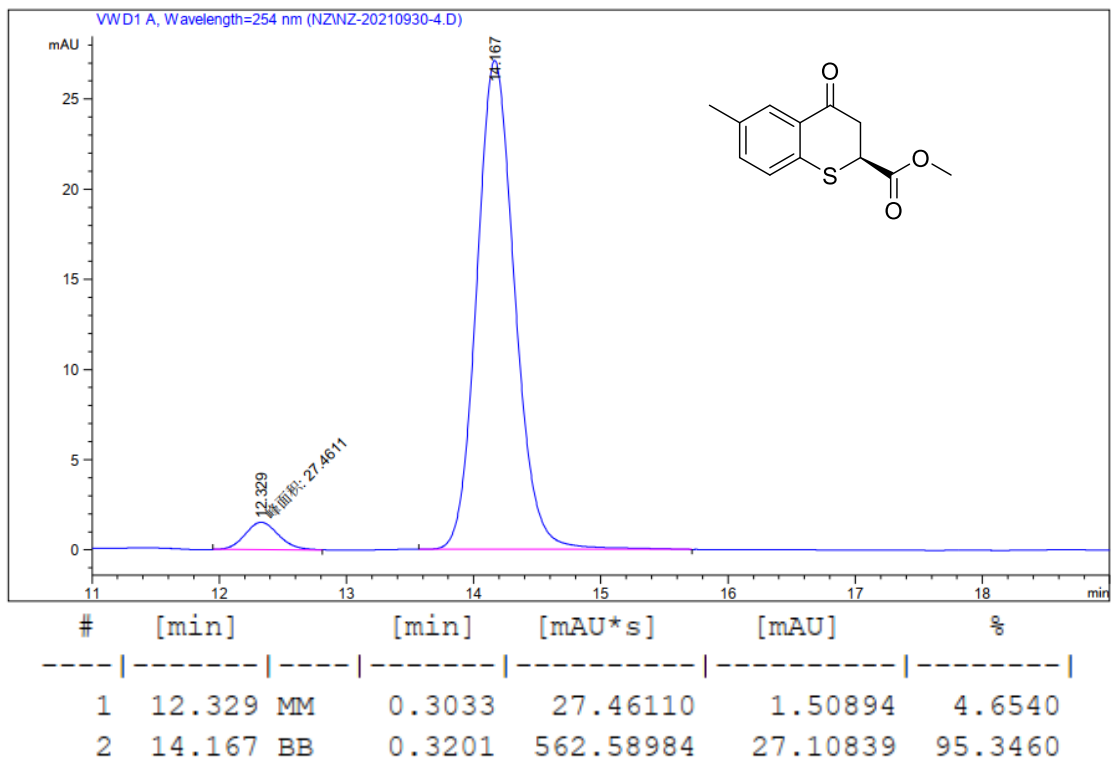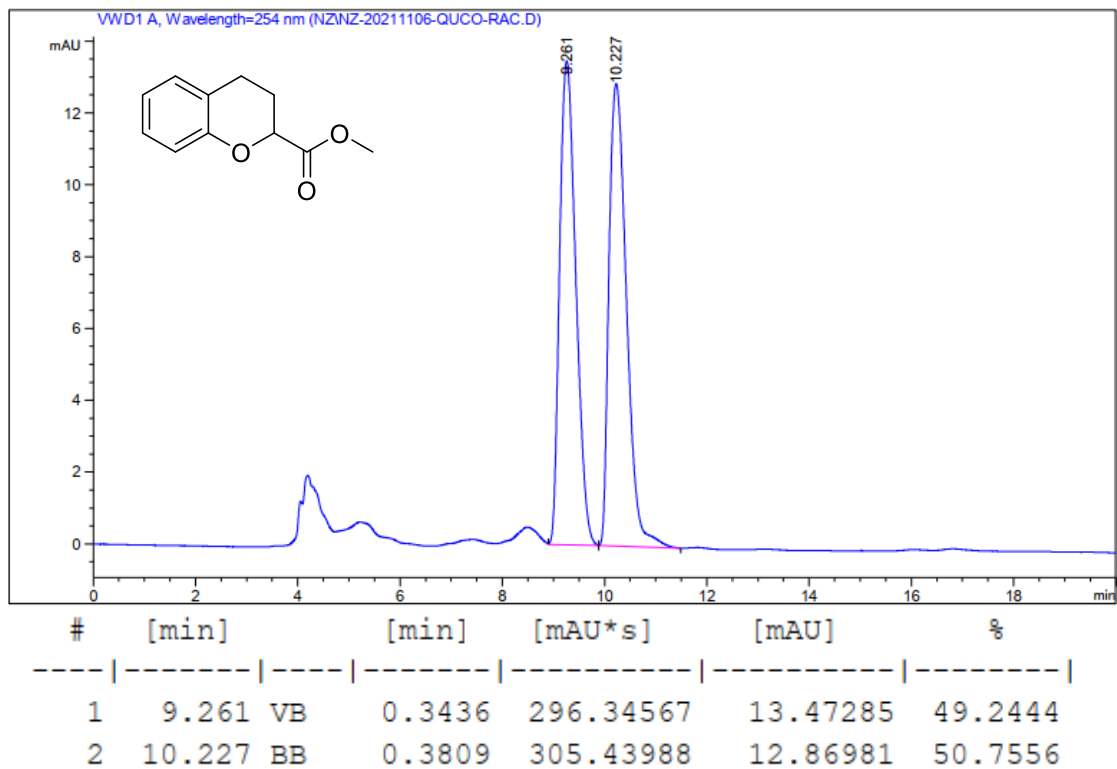

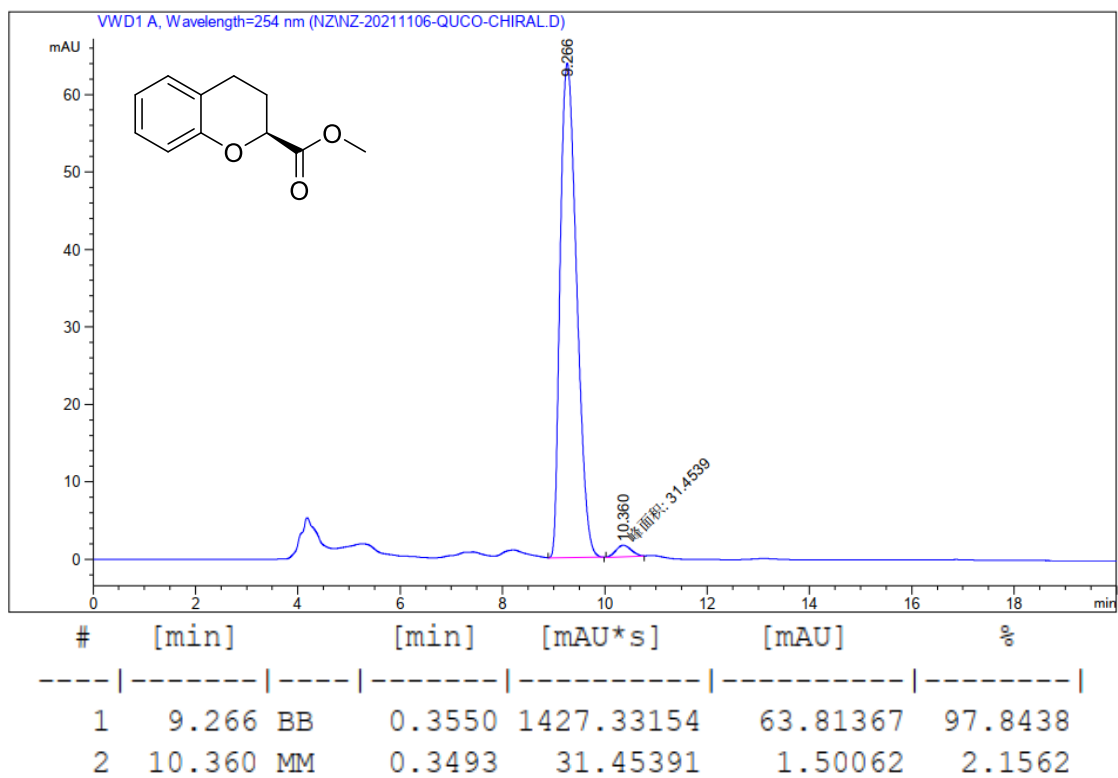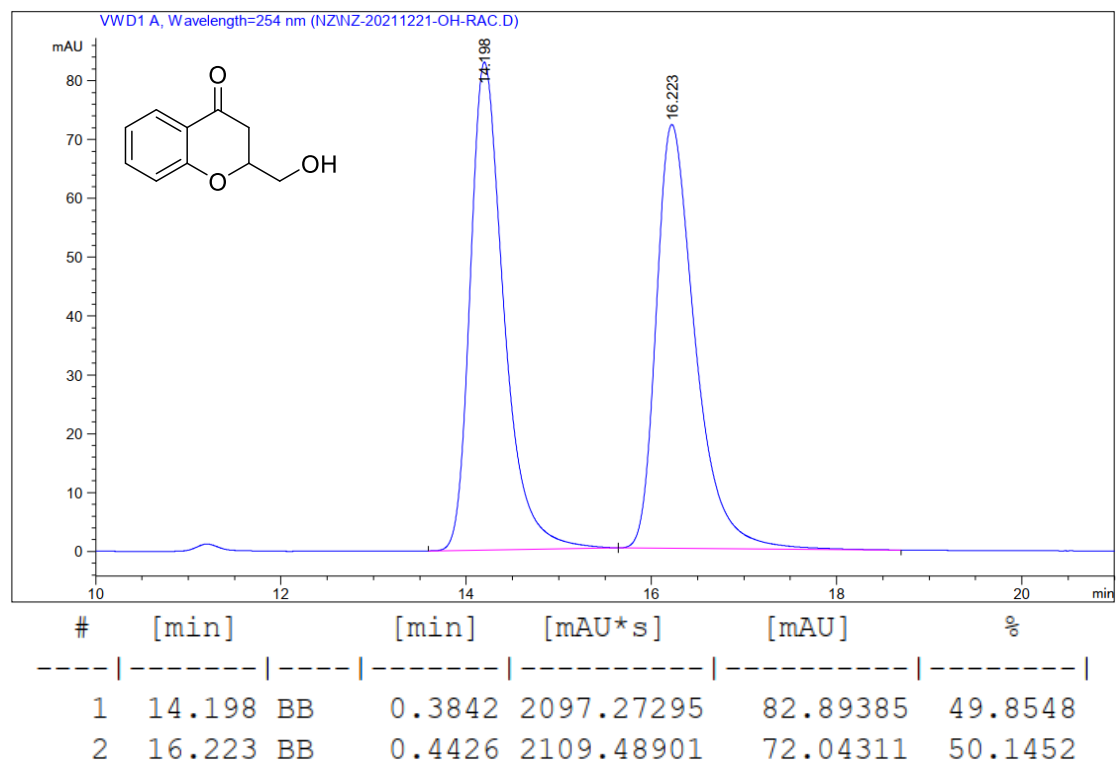

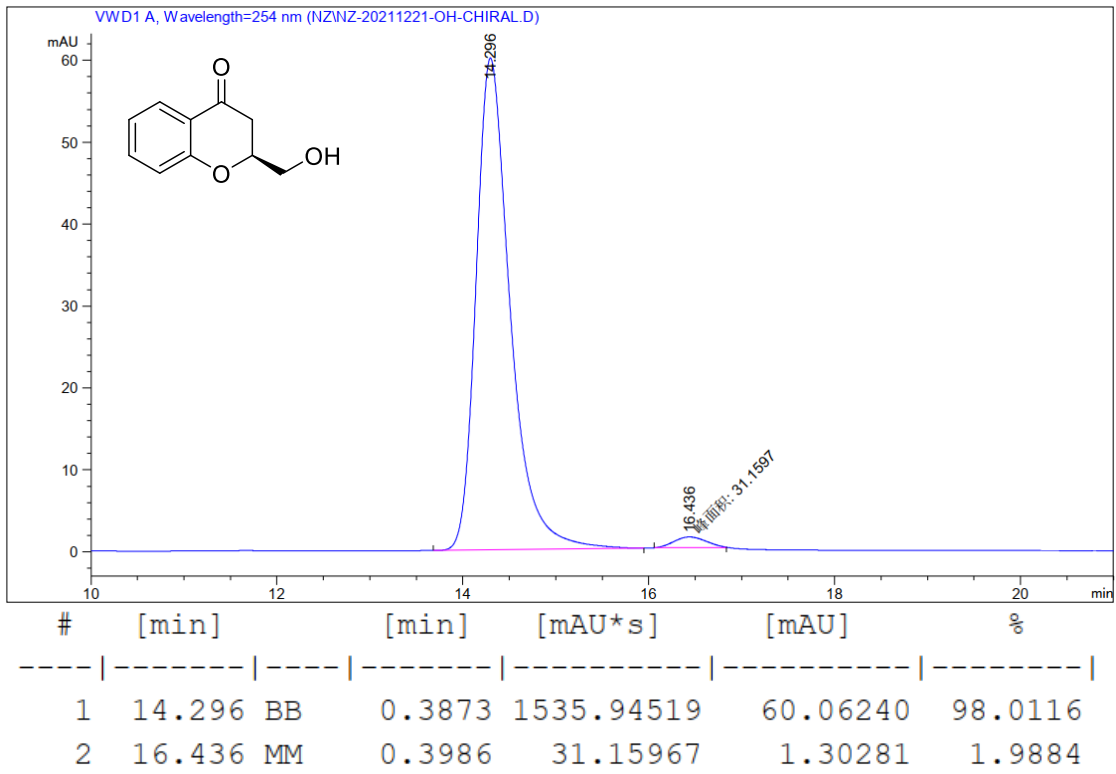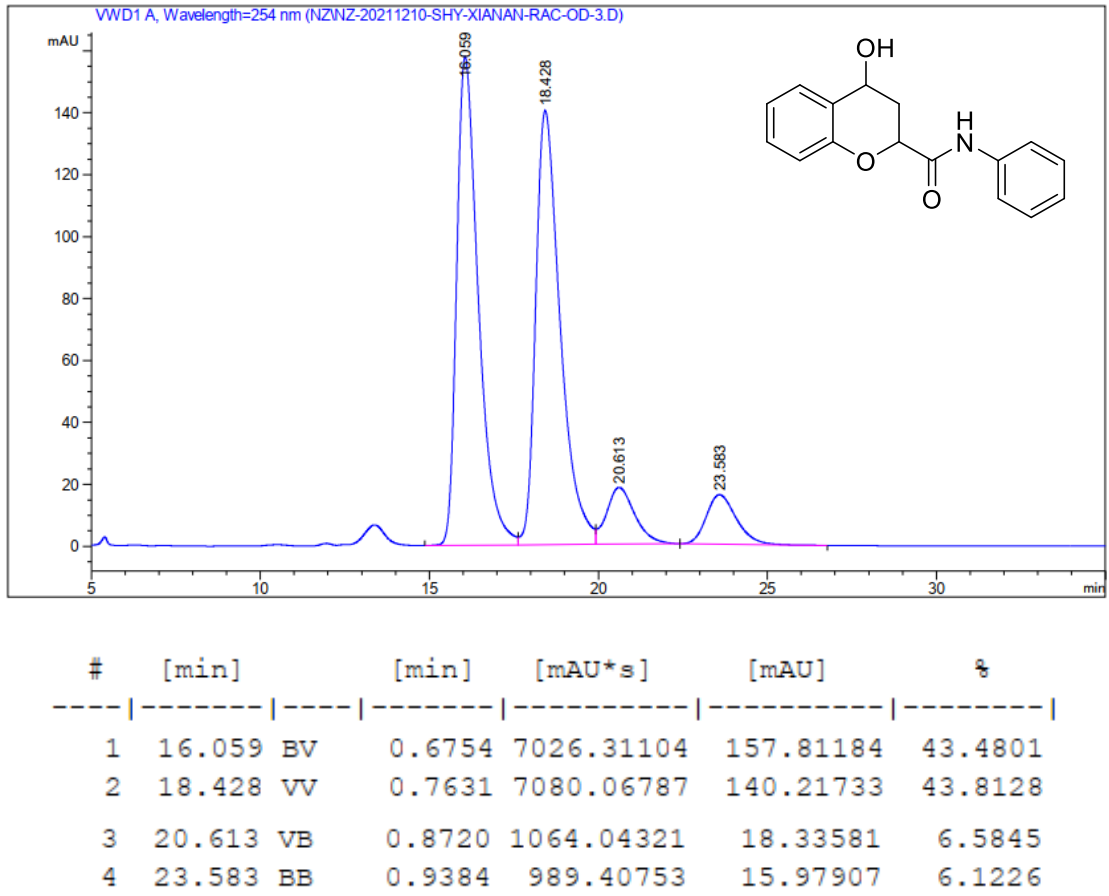

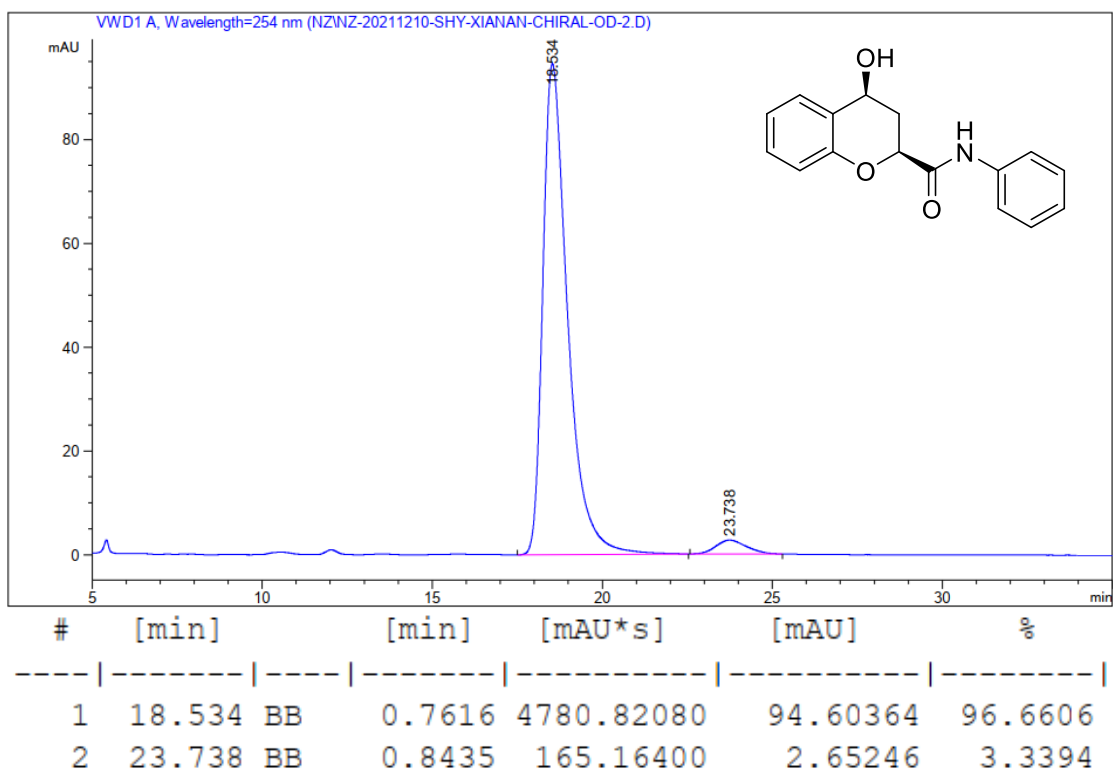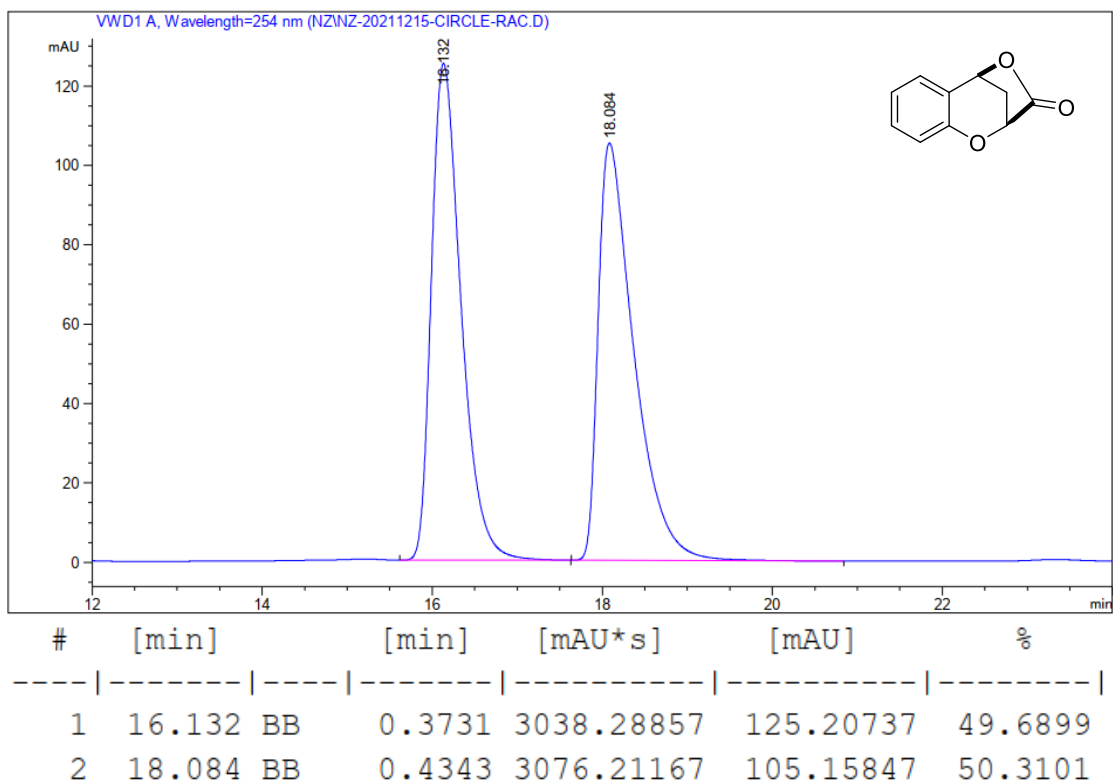

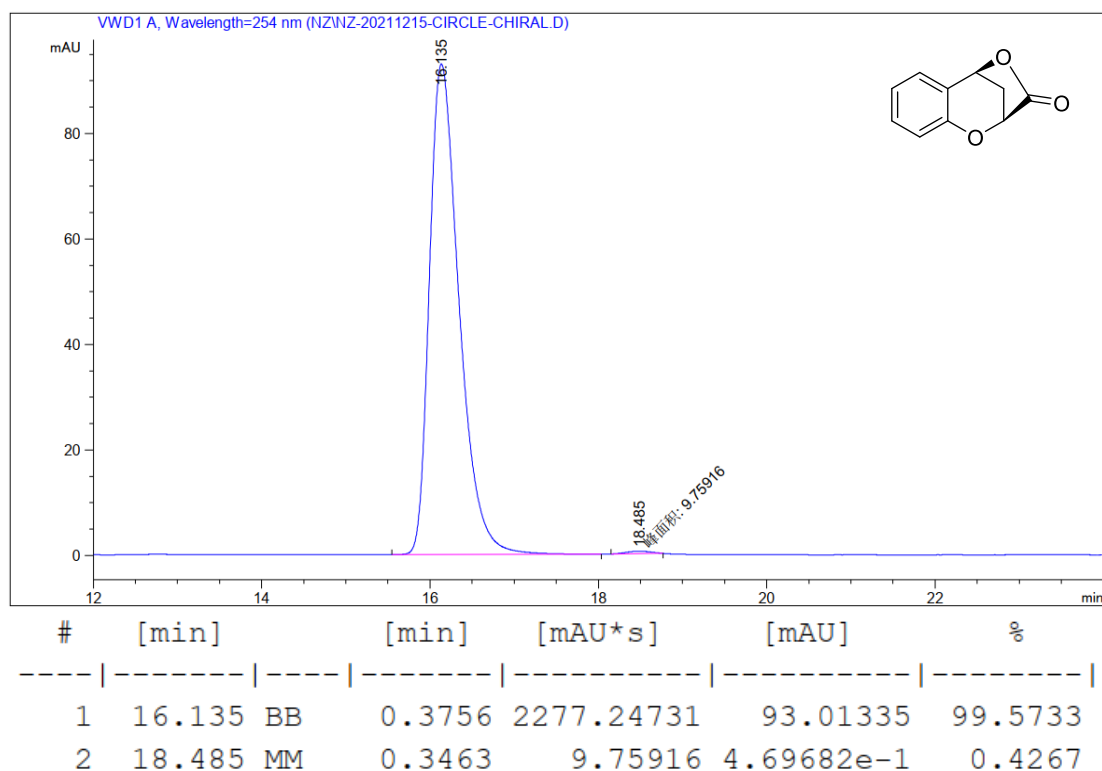

## 10. Reference

1. Cagide, F.; Oliveira, C.; Reis, J.; Borges, F. *Molecules*, **2019**, *24*, 4214.
2. Anderson, J.; Liepa, A. *Aust. J. Chem.*, **1987**, *40*, 1179.
3. Akram, M. O.; Bera, S.; a Patil, N. T. *Chem. Commun.*, **2016**, *52*, 12306.
4. a) Becke, A. D. *J. Chem. Phys.* **1993**, *98*, 5648-5652; b) Lee, C., Yang, W. & Parr, R. G. *Phys. Rev. B: Condens. Matter Mater. Phys.* **1988**, *37*, 785-789.
5. a) Hay, P. J.; Wadt, W. R. *J. Chem. Phys.* **1985**, *82*, 299-310; b) Wadt, W. R.; Hay, P. J. *J. Chem. Phys.* **1985**, *82*, 284-298; c) Roy, L. E.; Hay, P. J.; Martin, R. L. *J. Chem. Theory Comput.* **2008**, *4*, 1029-1031; d) Hay, P. J.; Wadt, W. R. *J. Chem. Phys.* **1985**, *82*, 270-283.
6. Zhao, Y. & Truhlar, D. G. *Theor. Chem. Acc.* **2008**, *120*, 215-241.
7. a) Cossi, M., Barone, V., Cammi, R. & Tomasi, J. *Chem. Phys. Lett.* **1996**, *255*, 327-335; b) Cancès, E., Mennucci, B. & Tomasi, J. *J. Chem. Phys.* **1997**, *107*, 3032-3041; c) Barone, V., Cossi, M. & Tomasi, J. *J. Comput. Chem.* **1998**, *19*, 404-417; d) Marenich, A. V., Cramer, C. J. & Truhlar, D. G. *J. Phys. Chem. B* **2009**, *113*, 6378-6396.
8. Fang, D.-C. THERMO; Beijing Normal University, Beijing, People's Republic of China, **2013**.
9. Legault, C. Y.; CYLView, 1.0b; Université de Sherbrooke, Canada, (**2009**). <http://www.cylview.org> (Date of access: 1/10/2017).
